# Supplementary material for: Age-related changes in cerebellar and hypothalamic function accompany non-microglial immune gene expression, altered synapse organization, and excitatory amino acid neurotransmission deficits
Source: publisher site journal article supplement (doi:10.18632/aging.101040), 2016-09-20
Supplement: Supplementary file 1 [file aging-v8i9-101040-supplementary-material-SD3.xls]

## Sheet: A. C57BL6
BEHAVIOR	link behavior	index	Avg Control	Avg Test	M3437	M3438	M3439	M3442	M3443	M3446	M3448	M3449	M3450	M3451	M3457	M3458	M3459	M3464	M3465	M3466	p (MW)	FDR (MW)	p (ttest)	FDR (ttest)	p (B)	B	Rank
AFL_avg_Chow_g	AFL_avg_Chow_g	1	3.31	3.5618	3.11333	3.26	3.76667	3.62667	3.40667	3.19333	3.1	3.01333	3.52667	3.38667	3.81333	3.46667	3.48667	3.40769	3.64667	3.76	0.981041	0.896577	0.03906	0.01372	0.03906	-0.105773	868
AFL_avg_DC_Chow_g	AFL_avg_DC_Chow_g	2	2.73911	3.09975	2.59148	2.6245	3.47941	3.31901	2.71665	2.21816	2.50409	2.4596	3.08824	2.9036	3.29779	3.05258	3.16721	2.87164	3.14173	3.27519	0.958508	0.946116	0.044417	0.015254	0.044417	-0.178441	865
AFL_avg_LC_Chow_gkg	AFL_avg_LC_Chow_gkg	3	22.6404	14.1138	21.0424	23.4936	9.99138	11.1267	28.6313	40.6321	23.7416	22.464	12.876	14.9325	15.298	12.9201	9.68053	17.4894	15.6814	14.0322	0.032479	0.106648	0.02971	0.011479	0.02971	0.681795	646
AFL_avg_Liquid_g	AFL_avg_Liquid_g	4	3.66917	4.17077	3.62	3.54667	3.84667	4.18667	3.76	3.53333	3.46667	3.39333	3.88	4.29333	3.88667	4.58	4.05333	4.24615	4.4	4.02667	0.999456	0.764737	0.001439	0.006488	0.001439	-0.184861	549
AFL_avg_DC_Liquid_g	AFL_avg_DC_Liquid_g	5	3.30414	3.75202	3.27191	3.18944	3.65821	3.9133	3.44472	2.82659	3.15323	2.97568	3.57032	3.7759	3.50853	4.17315	3.75148	3.5737	3.90578	3.75734	0.992618	0.832628	0.008806	0.007809	0.008806	-0.183396	632
AFL_avg_LC_Liquid_g	AFL_avg_LC_Liquid_g	6	0.365031	0.418745	0.348085	0.357226	0.188462	0.273371	0.315279	0.706748	0.313432	0.417648	0.309682	0.517429	0.37814	0.406847	0.301854	0.672457	0.494224	0.269328	0.747319	0.923117	0.470812	0.072349	0.470812	-0.198052	871
AFL_avg_Move_m	AFL_avg_Move_m	7	395.955	253.46	384.761	396.282	500.75	358.776	396.474	402.106	375.159	353.33	202.043	254.832	161.039	212.915	284.78	257.992	471.825	182.258	0.003497	0.046628	0.002204	0.007012	0.002204	0.643575	874
AFL_avg_DC_Move_m	AFL_avg_DC_Move_m	8	360.376	225.795	353.756	367.552	467.078	323.851	350.196	365.409	344.726	310.439	180.82	226.203	138.009	193.367	259.083	223.291	429.76	155.828	0.003497	0.045695	0.002376	0.006946	0.002376	0.674489	888
AFL_avg_LC_Move_m	AFL_avg_LC_Move_m	9	35.5789	27.6654	31.0052	28.7305	33.6722	34.925	46.2779	36.6966	30.4334	42.8904	21.2229	28.6288	23.03	19.548	25.6965	34.7013	42.0655	26.4303	0.010334	0.059234	0.036944	0.013367	0.036944	0.362939	885
TBA_DCLC_MeanPerAct	TBA_DCLC_MeanPerAct	10	30.2102	24.6465	27.8555	27.1456	32.7868	31.8652	26.7089	37.7386	29.7742	27.807	21.3335	25.9186	21.8963	18.21	23.4049	28.8112	29.2751	28.3225	0.018959	0.089126	0.013055	0.00856	0.013055	0.293653	881
TBA_DCLC_MeanPerInact	TBA_DCLC_MeanPerInact	11	69.7898	75.3535	72.1445	72.8544	67.2132	68.1348	73.2911	62.2614	70.2258	72.193	78.6665	74.0814	78.1037	81.79	76.5951	71.1888	70.7249	71.6775	0.985936	0.882536	0.013055	0.008665	0.013055	-0.110658	878
TBA_DCLC_MeanPerStop	TBA_DCLC_MeanPerStop	12	20.3182	13.947	18.5333	18.3452	22.2098	19.7744	14.5692	29.6336	20.5895	18.8906	10.5298	16.9522	12.514	9.87966	13.4431	16.6061	16.7037	14.9475	0.000932	0.050772	0.003707	0.006684	0.003707	0.542818	233
TBA_DCLC_MeanPerStopAtHomeBase	TBA_DCLC_MeanPerStopAtHomeBase	13	7.95322	7.14546	6.64509	7.97486	6.69682	9.16863	4.54399	13.2087	9.32073	6.06693	5.73598	9.09464	5.58044	4.45716	7.59477	10.5638	6.21426	7.92266	0.220901	0.428326	0.50557	0.074515	0.50557	0.154512	243
TBA_DCLC_MeanPerLongStopAtHomeBase	TBA_DCLC_MeanPerLongStopAtHomeBase	14	6.20927	6.02072	5.29034	5.97927	5.00812	6.90836	2.61915	11.4269	7.76649	4.67546	4.64709	7.69376	4.64433	3.26651	6.29741	9.61129	4.73374	7.27167	0.399223	0.658759	0.875415	0.111812	0.875415	0.044486	273
TBA_DCLC_MeanPerShortStopAtHomeBase	TBA_DCLC_MeanPerShortStopAtHomeBase	15	1.74395	1.12474	1.35475	1.9956	1.6887	2.26027	1.92484	1.78174	1.55424	1.39147	1.08889	1.40088	0.936113	1.19066	1.29736	0.952483	1.48052	0.650989	0.000932	0.046867	0.00086	0.00775	0.00086	0.632773	283
TBA_DCLC_MeanPerStopAtFeeder	TBA_DCLC_MeanPerStopAtFeeder	16	3.65261	1.7781	2.94772	3.86759	2.63986	2.62007	3.41307	5.03891	6.30558	2.38805	1.06752	2.70229	1.41746	1.18375	1.22364	1.38215	3.22272	2.02527	0.003497	0.044799	0.004921	0.006915	0.004921	1.03859	861
TBA_DCLC_MeanPerStopAtLickSpout	TBA_DCLC_MeanPerStopAtLickSpout	17	1.06076	1.139	1.04575	0.632897	2.40187	1.06443	0.792544	0.60804	0.848248	1.09233	0.734234	1.00688	0.809879	0.970406	0.995619	0.888181	2.6624	1.0444	0.560761	0.805329	0.797979	0.104135	0.797979	-0.102664	858
TBA_DCLC_MeanPerStopAtOther	TBA_DCLC_MeanPerStopAtOther	18	7.65161	3.88444	7.89478	5.86987	10.4713	6.92127	5.81955	10.778	4.11491	9.34325	2.99205	4.1484	4.70618	3.26834	3.62907	3.77199	4.60428	3.95518	0.000544	0.071081	0.000717	0.011074	0.000717	0.978059	338
TBA_DCLC_MeanPerGo	TBA_DCLC_MeanPerGo	19	3.81612	2.92971	3.37839	3.68533	4.52943	3.56382	3.61148	3.55405	4.33652	3.86993	2.7858	3.3962	1.96077	2.87412	2.74435	3.30438	4.01309	2.35898	0.003497	0.043938	0.005175	0.007087	0.005175	0.381348	441
TBA_DCLC_MeanPerFeed	TBA_DCLC_MeanPerFeed	20	5.59022	7.15258	5.18452	4.76513	5.58116	8.07339	8.01883	4.13394	4.46243	4.50237	7.37787	4.90449	6.71155	4.79761	6.63824	8.25477	7.99192	10.5442	0.958508	0.944689	0.092838	0.022519	0.092838	-0.355558	427
TBA_DCLC_MeanPerDrink	TBA_DCLC_MeanPerDrink	21	0.485676	0.617235	0.759233	0.349881	0.466429	0.453581	0.509381	0.41696	0.385821	0.544123	0.640072	0.66575	0.710044	0.65862	0.579194	0.645993	0.566384	0.471822	0.992618	0.831561	0.024472	0.010632	0.024472	-0.345825	469
TBA_DCLC_MeanPerAct_DC	TBA_DCLC_MeanPerAct_DC	22	48.5035	39.1246	44.3362	44.3071	55.6917	52.9264	41.6721	59.1838	47.593	42.3174	34.5251	40.2372	33.5964	30.2698	38.4423	44.839	46.4223	44.6649	0.018959	0.088489	0.009926	0.008135	0.009926	0.310011	328
TBA_DCLC_MeanPerInact_DC	TBA_DCLC_MeanPerInact_DC	23	51.4965	60.8754	55.6638	55.6929	44.3083	47.0736	58.3279	40.8162	52.407	57.6826	65.4749	59.7628	66.4036	69.7302	61.5577	55.161	53.5777	55.3351	0.985936	0.881329	0.009926	0.008014	0.009926	-0.241383	342
TBA_DCLC_MeanPerStop_DC	TBA_DCLC_MeanPerStop_DC	24	32.5319	21.829	29.2491	30.0576	37.4828	32.5671	22.3048	47.2195	32.9508	28.4239	17.0191	26.02	18.6695	16.447	21.6609	25.8374	25.9066	23.0717	0.000932	0.043519	0.002851	0.006426	0.002851	0.575609	447
TBA_DCLC_MeanPerStopAtHomeBase_DC	TBA_DCLC_MeanPerStopAtHomeBase_DC	25	11.8732	10.6608	9.59911	12.5262	10.8205	14.5531	6.19962	19.663	13.8277	7.79665	8.87605	13.4207	7.73771	7.11778	11.5144	16.2715	8.51119	11.8371	0.286869	0.513566	0.528781	0.076477	0.528781	0.155396	339
TBA_DCLC_MeanPerLongStopAtHomeBase_DC	TBA_DCLC_MeanPerLongStopAtHomeBase_DC	26	9.11209	8.8904	7.46952	9.19298	8.0259	10.901	3.24897	16.9216	11.3945	5.74225	7.17985	11.1339	6.30852	5.11517	9.37302	14.8218	6.30009	10.8909	0.439239	0.689943	0.906891	0.113161	0.906891	0.035532	442
TBA_DCLC_MeanPerShortStopAtHomeBase_DC	TBA_DCLC_MeanPerShortStopAtHomeBase_DC	27	2.76116	1.77041	2.1296	3.33323	2.79457	3.65215	2.95065	2.7414	2.43325	2.05441	1.6962	2.28682	1.4292	2.00262	2.14141	1.44971	2.2111	0.946229	0.002331	0.040083	0.00179	0.007173	0.00179	0.641189	433
TBA_DCLC_MeanPerStopAtFeeder_DC	TBA_DCLC_MeanPerStopAtFeeder_DC	28	6.20113	2.97648	4.89771	6.68515	4.55308	4.48466	5.84739	8.49042	10.7861	3.86454	1.79476	4.47381	2.35513	2.06958	2.10145	2.23363	5.53271	3.25074	0.001476	0.033265	0.004865	0.007018	0.004865	1.05892	473
TBA_DCLC_MeanPerStopAtLickSpout_DC	TBA_DCLC_MeanPerStopAtLickSpout_DC	29	1.81959	1.91586	1.76198	1.03986	4.33012	1.86522	1.34474	0.943324	1.46532	1.80617	1.2746	1.62159	1.2967	1.6815	1.77192	1.43666	4.47913	1.76478	0.560761	0.803563	0.858847	0.110742	0.858847	-0.074376	332
TBA_DCLC_MeanPerStopAtOther_DC	TBA_DCLC_MeanPerStopAtOther_DC	30	12.638	6.27588	12.9903	9.80636	17.7791	11.6641	8.913	18.1227	6.87162	14.9566	5.07364	6.50392	7.27995	5.57811	6.27308	5.89564	7.38357	6.21909	0.000311	0.101545	0.000731	0.008783	0.000731	1.00988	329
TBA_DCLC_MeanPerGo_DC	TBA_DCLC_MeanPerGo_DC	31	6.33078	4.7749	5.60398	6.34206	7.79258	5.84518	5.84631	5.86666	7.19036	6.15909	4.57799	5.4701	3.01442	4.86659	4.63897	5.2736	6.71456	3.64299	0.002331	0.039056	0.006148	0.007076	0.006148	0.406911	470
TBA_DCLC_MeanPerFeed_DC	TBA_DCLC_MeanPerFeed_DC	32	8.84775	11.5245	8.23762	7.33069	9.60027	13.7491	12.6772	5.50225	6.81296	6.872	11.8706	7.70454	10.7741	7.8639	11.1593	12.7534	12.901	17.1689	0.958508	0.943266	0.095112	0.022968	0.095112	-0.381318	428
TBA_DCLC_MeanPerDrink_DC	TBA_DCLC_MeanPerDrink_DC	33	0.792988	0.996221	1.24544	0.576746	0.816099	0.765112	0.843886	0.595343	0.638936	0.862342	1.05742	1.04256	1.13836	1.0923	0.98314	0.974547	0.90016	0.781276	0.989666	0.857677	0.033158	0.012586	0.033158	-0.329167	340
TBA_DCLC_MeanPerAct_LC	TBA_DCLC_MeanPerAct_LC	34	8.36793	7.25908	7.61975	7.33326	5.75157	7.04818	9.07851	11.5929	8.17014	10.3491	5.60808	8.40282	7.65225	3.91399	5.40462	9.602	8.8545	8.63437	0.252681	0.467739	0.277069	0.049219	0.277069	0.205083	443
TBA_DCLC_MeanPerInact_LC	TBA_DCLC_MeanPerInact_LC	35	91.6321	92.7409	92.3802	92.6667	94.2484	92.9518	90.9215	88.4071	91.8299	89.6509	94.3919	91.5972	92.3478	96.086	94.5954	90.398	91.1455	91.3656	0.779099	0.932408	0.277069	0.049058	0.277069	-0.017353	445
TBA_DCLC_MeanPerStop_LC	TBA_DCLC_MeanPerStop_LC	36	5.74726	4.51118	5.38131	4.90067	4.21655	4.80906	5.43911	8.14135	5.60837	7.48163	2.87809	5.86399	5.08032	2.12154	3.56485	5.56513	5.77231	5.24325	0.191142	0.380793	0.100063	0.023739	0.100063	0.349368	431
TBA_DCLC_MeanPerStopAtHomeBase_LC	TBA_DCLC_MeanPerStopAtHomeBase_LC	37	3.26169	2.91445	3.03064	2.78413	1.87283	2.82935	2.60434	5.10384	3.91915	3.94924	2.05102	3.77811	2.96306	1.34292	2.77007	3.69623	3.42103	3.29316	0.322688	0.569886	0.467836	0.072406	0.467836	0.162396	471
TBA_DCLC_MeanPerLongStopAtHomeBase_LC	TBA_DCLC_MeanPerLongStopAtHomeBase_LC	38	2.71263	2.55377	2.62796	2.30911	1.46478	2.21424	1.86749	4.44319	3.42991	3.34438	1.65795	3.44793	2.61129	1.10864	2.46196	3.33697	2.82496	2.9805	0.479565	0.733881	0.727366	0.097993	0.727366	0.087062	330
TBA_DCLC_MeanPerShortStopAtHomeBase_LC	TBA_DCLC_MeanPerShortStopAtHomeBase_LC	39	0.549058	0.360675	0.402677	0.475014	0.408052	0.615108	0.736859	0.660652	0.489236	0.604865	0.393072	0.330185	0.351772	0.234272	0.30812	0.359251	0.596069	0.312657	0.000932	0.040618	0.005414	0.006973	0.005414	0.60626	478
TBA_DCLC_MeanPerStopAtFeeder_LC	TBA_DCLC_MeanPerStopAtFeeder_LC	40	0.59702	0.353146	0.513059	0.615316	0.357967	0.427196	0.526347	0.882573	0.868238	0.58546	0.212478	0.575871	0.271312	0.136465	0.199906	0.375491	0.487021	0.566628	0.014064	0.076582	0.017987	0.009828	0.017987	0.757512	429
TBA_DCLC_MeanPerStopAtLickSpout_LC	TBA_DCLC_MeanPerStopAtLickSpout_LC	41	0.154692	0.208309	0.159899	0.140884	0.139664	0.112252	0.131144	0.189619	0.098274	0.265797	0.074524	0.243537	0.223309	0.120993	0.080116	0.241208	0.52054	0.162242	0.713131	0.89786	0.338128	0.056978	0.338128	-0.429329	444
TBA_DCLC_MeanPerStopAtOther_LC	TBA_DCLC_MeanPerStopAtOther_LC	42	1.73385	1.03528	1.67771	1.36035	1.84608	1.44027	2.17727	1.96532	0.722711	2.68113	0.540069	1.26647	1.62263	0.521163	0.514749	1.2522	1.34372	1.22122	0.003497	0.043109	0.01748	0.009798	0.01748	0.743965	479
TBA_DCLC_MeanPerGo_LC	TBA_DCLC_MeanPerGo_LC	43	0.829325	0.742447	0.640081	0.64231	0.690238	0.877014	0.989376	0.777337	0.874753	1.14349	0.677152	0.898767	0.69733	0.522781	0.517016	0.981193	0.829714	0.815626	0.252681	0.466418	0.333505	0.056908	0.333505	0.159649	480
TBA_DCLC_MeanPerFeed_LC	TBA_DCLC_MeanPerFeed_LC	44	1.67639	1.84796	1.43963	1.70983	0.796414	1.27913	2.54046	2.46914	1.60426	1.57223	1.92005	1.43919	1.69537	1.13445	1.22332	2.80652	2.08622	2.47852	0.677312	0.869515	0.569112	0.081225	0.569112	-0.140576	430
TBA_DCLC_MeanPerDrink_LC	TBA_DCLC_MeanPerDrink_LC	45	0.114958	0.157495	0.158736	0.080448	0.048368	0.082976	0.109563	0.20509	0.082757	0.151722	0.132792	0.200867	0.17923	0.135224	0.099436	0.249169	0.166263	0.096976	0.947552	0.949647	0.125128	0.027968	0.125128	-0.4542	350
TBA_DCLC_MeanPerActStop	TBA_DCLC_MeanPerActStop	46	66.6887	56.1711	66.5206	67.3573	67.7624	62.1456	54.5057	78.2274	69.0579	67.9326	49.1724	65.1441	56.9575	54.2112	57.1234	57.4006	56.9294	52.4299	0.002331	0.038079	0.002563	0.00711	0.002563	0.247615	459
TBA_DCLC_MeanPerActStopAtHomeBase	TBA_DCLC_MeanPerActStopAtHomeBase	47	25.8457	28.5413	23.958	29.1916	20.5568	28.8512	17.0821	34.1574	31.2772	21.6909	26.681	34.8334	25.2372	24.4745	32.111	36.3467	21.2354	27.4113	0.835897	0.956584	0.354238	0.058958	0.354238	-0.14313	457
TBA_DCLC_MeanPerActLongStopAtHomeBase	TBA_DCLC_MeanPerActLongStopAtHomeBase	48	20.0054	23.8521	19.1223	21.803	15.3911	21.7498	9.81137	29.3854	26.0734	16.7066	21.5832	29.4533	20.9663	17.8899	26.5839	33.0444	16.1832	25.1123	0.860684	0.963024	0.219155	0.042112	0.219155	-0.253728	108
TBA_DCLC_MeanPerActShortStopAtHomeBase	TBA_DCLC_MeanPerActShortStopAtHomeBase	49	5.84031	4.68924	4.83576	7.38861	5.16579	7.10146	7.27068	4.77196	5.20386	4.98431	5.09774	5.38013	4.27092	6.58461	5.52712	3.30228	5.05215	2.29899	0.139316	0.298475	0.091882	0.022438	0.091882	0.316689	42
TBA_DCLC_MeanPerActStopAtFeeder	TBA_DCLC_MeanPerActStopAtFeeder	50	12.1361	7.04958	10.4696	14.2855	8.028	8.14054	12.7751	13.6532	21.186	8.551	4.99918	10.4236	6.4703	6.50167	5.15426	4.83713	10.8828	7.12769	0.003497	0.04231	0.012595	0.008624	0.012595	0.783697	40
TBA_DCLC_MeanPerActStopAtLickSpout	TBA_DCLC_MeanPerActStopAtLickSpout	51	3.50771	4.57295	3.72996	2.31861	7.27924	3.36586	2.95325	1.60898	2.85223	3.95355	3.40659	3.94066	3.74246	5.28349	4.29596	3.10524	9.05273	3.75651	0.967521	0.928367	0.260298	0.047169	0.260298	-0.382597	106
TBA_DCLC_MeanPerActStopAtOther	TBA_DCLC_MeanPerActStopAtOther	52	25.1992	16.0072	28.363	21.5616	31.8983	21.7879	21.6953	28.8078	13.7424	33.7372	14.0856	15.9463	21.5076	17.9515	15.5621	13.1115	15.7585	14.1344	0.003497	0.041541	0.002731	0.006872	0.002731	0.654657	16
TBA_DCLC_MeanPerActGo	TBA_DCLC_MeanPerActGo	53	12.7572	12.023	12.0612	13.5301	13.7355	11.1867	13.5377	9.53715	14.5512	13.9183	13.0866	13.1053	9.02791	15.7949	11.6881	11.5267	13.642	8.31264	0.191142	0.379636	0.497744	0.073966	0.497744	0.085517	82
TBA_DCLC_MeanPerActFeed	TBA_DCLC_MeanPerActFeed	54	18.9089	29.1932	18.6875	17.807	17.0713	25.2483	30.0464	11.1237	15.0922	16.1946	34.7309	19.1395	30.771	26.3792	28.6843	28.8064	27.4693	37.5647	0.998524	0.772161	0.00313	0.00639	0.00313	-0.626568	94
TBA_DCLC_MeanPerActDrink	TBA_DCLC_MeanPerActDrink	55	1.64521	2.61276	2.73068	1.30565	1.43081	1.4194	1.9101	1.11183	1.29866	1.95454	3.01021	2.61112	3.24355	3.61469	2.50416	2.26628	1.95925	1.69283	0.997669	0.798919	0.005672	0.006895	0.005672	-0.667304	28
TBA_DCLC_MeanPerActStop_DC	TBA_DCLC_MeanPerActStop_DC	56	66.4536	55.4588	65.96	67.5372	67.273	61.544	53.5093	79.4728	69.1826	67.1497	49.0597	64.4546	55.3379	54.2828	56.0952	57.3509	55.6854	51.4043	0.003497	0.040799	0.002754	0.00662	0.002754	0.260929	519
TBA_DCLC_MeanPerActStopAtHomeBase_DC	TBA_DCLC_MeanPerActStopAtHomeBase_DC	57	23.8894	26.8469	21.6967	28.0155	19.4153	27.5459	14.9087	32.279	28.9505	18.3031	25.4604	33.0436	22.7414	23.5082	29.7012	35.959	18.3851	25.9759	0.835897	0.954912	0.336712	0.057095	0.336712	-0.168385	600
TBA_DCLC_MeanPerActLongStopAtHomeBase_DC	TBA_DCLC_MeanPerActLongStopAtHomeBase_DC	58	18.1491	22.2145	16.9075	20.5248	14.423	20.6159	7.78188	27.5794	23.8415	13.5188	20.5773	27.4101	18.4972	16.8589	24.141	32.7378	13.634	23.86	0.882751	0.967828	0.211698	0.041265	0.211698	-0.291606	735
TBA_DCLC_MeanPerActShortStopAtHomeBase_DC	TBA_DCLC_MeanPerActShortStopAtHomeBase_DC	59	5.74026	4.63232	4.78922	7.49076	4.9923	6.93005	7.12684	4.69956	5.10897	4.78438	4.88309	5.63348	4.24423	6.64927	5.56029	3.22113	4.75117	2.11592	0.097436	0.238459	0.117771	0.026936	0.117771	0.309381	255
TBA_DCLC_MeanPerActStopAtFeeder_DC	TBA_DCLC_MeanPerActStopAtFeeder_DC	60	12.8849	7.43882	10.9862	15.1025	8.18642	8.33948	14.0377	14.6028	22.7188	9.10509	5.17716	11.1119	6.99928	6.83947	5.37625	5.01462	11.7711	7.22077	0.005206	0.038222	0.014698	0.009035	0.014698	0.792532	265
TBA_DCLC_MeanPerActStopAtLickSpout_DC	TBA_DCLC_MeanPerActStopAtLickSpout_DC	61	3.72458	4.84397	3.97733	2.37418	7.70558	3.58381	3.22444	1.60305	3.09021	4.23806	3.67921	4.11231	3.89519	5.50066	4.65586	3.22671	9.64088	4.04091	0.958508	0.941847	0.267871	0.048058	0.267871	-0.37911	245
TBA_DCLC_MeanPerActStopAtOther_DC	TBA_DCLC_MeanPerActStopAtOther_DC	62	25.9548	16.3292	29.2997	22.045	31.9657	22.0748	21.3385	30.988	14.4231	35.5034	14.743	16.1868	21.702	18.4345	16.3619	13.1506	15.8883	14.1667	0.003497	0.040083	0.002871	0.006211	0.002871	0.668545	314
TBA_DCLC_MeanPerActGo_DC	TBA_DCLC_MeanPerActGo_DC	63	13.1814	12.2802	12.5815	14.198	13.8953	11.0626	14.0673	10.061	15.1092	14.4763	13.2692	13.5681	9.02795	16.0831	12.0212	11.7767	14.3607	8.13436	0.220901	0.427059	0.439436	0.069401	0.439436	0.102172	403
TBA_DCLC_MeanPerActFeed_DC	TBA_DCLC_MeanPerActFeed_DC	64	18.6713	29.6039	18.6235	16.9322	17.3512	25.9454	30.3901	9.45014	14.3605	16.3176	34.5825	19.3416	32.227	26.02	29.2993	28.6807	27.9938	38.6866	0.998524	0.771249	0.003394	0.00633	0.003394	-0.664965	408
TBA_DCLC_MeanPerActDrink_DC	TBA_DCLC_MeanPerActDrink_DC	65	1.69373	2.65708	2.83507	1.33266	1.48048	1.44806	2.03336	1.01612	1.34768	2.05639	3.08863	2.63569	3.40718	3.61417	2.58428	2.19179	1.96012	1.77476	0.994794	0.820757	0.008322	0.007828	0.008322	-0.649638	190
TBA_DCLC_MeanPerActStop_LC	TBA_DCLC_MeanPerActStop_LC	66	67.7616	59.9616	69.5069	65.58	72.7969	66.996	58.7386	69.2038	67.5775	71.6934	49.4729	68.1547	65.4082	51.8606	63.5906	56.3185	65.5269	59.3604	0.005206	0.037797	0.016827	0.009735	0.016827	0.17643	187
TBA_DCLC_MeanPerActStopAtHomeBase_LC	TBA_DCLC_MeanPerActStopAtHomeBase_LC	67	37.9085	38.6518	38.8294	36.5794	32.117	40.3231	27.888	43.0196	46.3433	38.1679	34.611	42.5129	38.5542	32.1878	49.0441	36.7197	39.2045	36.3806	0.520435	0.767661	0.792398	0.103908	0.792398	-0.028017	189
TBA_DCLC_MeanPerActLongStopAtHomeBase_LC	TBA_DCLC_MeanPerActLongStopAtHomeBase_LC	68	31.2623	33.4736	33.475	30.0633	25.0081	31.8922	19.8414	37.4535	40.1957	32.1692	27.9152	38.7773	34.1654	26.2814	43.1076	32.8231	32.4574	32.2617	0.808858	0.943823	0.472455	0.072499	0.472455	-0.098602	221
TBA_DCLC_MeanPerActShortStopAtHomeBase_LC	TBA_DCLC_MeanPerActShortStopAtHomeBase_LC	69	6.64616	5.17819	5.35436	6.51606	7.10894	8.43093	8.04659	5.5661	6.14759	5.99869	6.69577	3.73557	4.3888	5.90637	5.93644	3.89663	6.74708	4.11883	0.032479	0.106114	0.028423	0.011388	0.028423	0.360074	34
TBA_DCLC_MeanPerActStopAtFeeder_LC	TBA_DCLC_MeanPerActStopAtFeeder_LC	70	7.36226	4.631	6.94775	8.63034	6.29566	6.19298	6.06145	7.80592	11.3565	5.60744	3.79557	6.87401	3.43281	3.48702	3.66344	4.03357	5.18736	6.57421	0.005206	0.037382	0.005582	0.007022	0.005582	0.668825	100
TBA_DCLC_MeanPerActStopAtLickSpout_LC	TBA_DCLC_MeanPerActStopAtLickSpout_LC	71	1.88086	2.67719	2.0556	2.00705	2.47423	1.50486	1.50435	1.7043	1.25881	2.53771	1.28041	2.89933	2.88397	3.17398	1.45188	2.46107	5.35134	1.91551	0.902564	0.968428	0.121934	0.027654	0.121934	-0.509322	414
TBA_DCLC_MeanPerActStopAtOther_LC	TBA_DCLC_MeanPerActStopAtOther_LC	72	20.6101	14.0016	21.6742	18.3632	31.91	18.9751	23.2848	16.674	8.61888	25.3804	9.78595	15.8685	20.5372	13.0119	9.43125	13.1042	15.7837	14.4901	0.014064	0.075949	0.02941	0.011486	0.02941	0.557757	620
TBA_DCLC_MeanPerActGo_LC	TBA_DCLC_MeanPerActGo_LC	73	10.1931	10.6559	8.5498	8.77866	12.0308	12.392	10.7897	6.64683	11.1497	11.2076	12.1308	10.8783	9.10554	13.6661	9.8154	10.4344	9.28648	9.9299	0.600777	0.83526	0.612343	0.085921	0.612343	-0.064051	179
TBA_DCLC_MeanPerActFeed_LC	TBA_DCLC_MeanPerActFeed_LC	74	20.6924	27.023	19.8757	24.5329	14.3636	19.3412	29.1906	22.3252	20.2856	15.6245	35.9613	18.4815	22.981	30.8286	24.5636	30.5273	23.3135	29.5268	0.989666	0.856541	0.029142	0.011464	0.029142	-0.385083	211
TBA_DCLC_MeanPerActDrink_LC	TBA_DCLC_MeanPerActDrink_LC	75	1.3528	2.35956	2.06763	1.10844	0.808678	1.27076	1.28115	1.82413	0.987125	1.47448	2.43501	2.48553	2.50526	3.64466	2.03032	2.71974	1.8731	1.18287	0.997669	0.797941	0.004001	0.00666	0.004001	-0.802572	181
TBA_APIP_MeanPerAct	TBA_APIP_MeanPerAct	76	30.2102	24.6465	27.8555	27.1456	32.7868	31.8652	26.7089	37.7386	29.7742	27.807	21.3335	25.9186	21.8963	18.21	23.4049	28.8112	29.2751	28.3225	0.018959	0.087861	0.013055	0.008508	0.013055	0.293653	396
TBA_APIP_MeanPerInact	TBA_APIP_MeanPerInact	77	69.7898	75.3535	72.1445	72.8544	67.2132	68.1348	73.2911	62.2614	70.2258	72.193	78.6665	74.0814	78.1037	81.79	76.5951	71.1888	70.7249	71.6775	0.985936	0.880125	0.013055	0.008612	0.013055	-0.110658	213
TBA_APIP_MeanPerStop	TBA_APIP_MeanPerStop	78	20.3182	13.947	18.5333	18.3452	22.2098	19.7744	14.5692	29.6336	20.5895	18.8906	10.5298	16.9522	12.514	9.87966	13.4431	16.6061	16.7037	14.9475	0.000932	0.038079	0.003707	0.006574	0.003707	0.542818	308
TBA_APIP_MeanPerStopAtHomeBase	TBA_APIP_MeanPerStopAtHomeBase	79	7.95322	7.14546	6.64509	7.97486	6.69682	9.16863	4.54399	13.2087	9.32073	6.06693	5.73598	9.09464	5.58044	4.45716	7.59477	10.5638	6.21426	7.92266	0.220901	0.425799	0.50557	0.074414	0.50557	0.154512	3
TBA_APIP_MeanPerLongStopAtHomeBase	TBA_APIP_MeanPerLongStopAtHomeBase	80	6.20927	6.02072	5.29034	5.97927	5.00812	6.90836	2.61915	11.4269	7.76649	4.67546	4.64709	7.69376	4.64433	3.26651	6.29741	9.61129	4.73374	7.27167	0.399223	0.6571	0.875415	0.111681	0.875415	0.044486	454
TBA_APIP_MeanPerShortStopAtHomeBase	TBA_APIP_MeanPerShortStopAtHomeBase	81	1.74395	1.12474	1.35475	1.9956	1.6887	2.26027	1.92484	1.78174	1.55424	1.39147	1.08889	1.40088	0.936113	1.19066	1.29736	0.952483	1.48052	0.650989	0.000932	0.035839	0.00086	0.007154	0.00086	0.632773	440
TBA_APIP_MeanPerStopAtFeeder	TBA_APIP_MeanPerStopAtFeeder	82	3.65261	1.7781	2.94772	3.86759	2.63986	2.62007	3.41307	5.03891	6.30558	2.38805	1.06752	2.70229	1.41746	1.18375	1.22364	1.38215	3.22272	2.02527	0.003497	0.039392	0.004921	0.006826	0.004921	1.03859	449
TBA_APIP_MeanPerStopAtLickSpout	TBA_APIP_MeanPerStopAtLickSpout	83	1.06076	1.139	1.04575	0.632897	2.40187	1.06443	0.792544	0.60804	0.848248	1.09233	0.734234	1.00688	0.809879	0.970406	0.995619	0.888181	2.6624	1.0444	0.560761	0.801804	0.797979	0.104009	0.797979	-0.102664	344
TBA_APIP_MeanPerStopAtOther	TBA_APIP_MeanPerStopAtOther	84	7.65161	3.88444	7.89478	5.86987	10.4713	6.92127	5.81955	10.778	4.11491	9.34325	2.99205	4.1484	4.70618	3.26834	3.62907	3.77199	4.60428	3.95518	0.000544	0.059234	0.000717	0.00969	0.000717	0.978059	334
TBA_APIP_MeanPerGo	TBA_APIP_MeanPerGo	85	3.81612	2.92971	3.37839	3.68533	4.52943	3.56382	3.61148	3.55405	4.33652	3.86993	2.7858	3.3962	1.96077	2.87412	2.74435	3.30438	4.01309	2.35898	0.003497	0.038725	0.005175	0.006998	0.005175	0.381348	475
TBA_APIP_MeanPerFeed	TBA_APIP_MeanPerFeed	86	5.59022	7.15258	5.18452	4.76513	5.58116	8.07339	8.01883	4.13394	4.46243	4.50237	7.37787	4.90449	6.71155	4.79761	6.63824	8.25477	7.99192	10.5442	0.958508	0.940433	0.092838	0.022469	0.092838	-0.355558	435
TBA_APIP_MeanPerDrink	TBA_APIP_MeanPerDrink	87	0.485676	0.617235	0.759233	0.349881	0.466429	0.453581	0.509381	0.41696	0.385821	0.544123	0.640072	0.66575	0.710044	0.65862	0.579194	0.645993	0.566384	0.471822	0.992618	0.830496	0.024472	0.01059	0.024472	-0.345825	717
TBA_APIP_MeanPerAct_AP	TBA_APIP_MeanPerAct_AP	88	48.5035	39.1246	44.3362	44.3071	55.6917	52.9264	41.6721	59.1838	47.593	42.3174	34.5251	40.2372	33.5964	30.2698	38.4423	44.839	46.4223	44.6649	0.018959	0.087243	0.009926	0.008074	0.009926	0.310011	739
TBA_APIP_MeanPerInact_AP	TBA_APIP_MeanPerInact_AP	89	51.4965	60.8754	55.6638	55.6929	44.3083	47.0736	58.3279	40.8162	52.407	57.6826	65.4749	59.7628	66.4036	69.7302	61.5577	55.161	53.5777	55.3351	0.985936	0.878924	0.009926	0.007954	0.009926	-0.241383	780
TBA_APIP_MeanPerStop_AP	TBA_APIP_MeanPerStop_AP	90	32.5319	21.829	29.2491	30.0576	37.4828	32.5671	22.3048	47.2195	32.9508	28.4239	17.0191	26.02	18.6695	16.447	21.6609	25.8374	25.9066	23.0717	0.000932	0.033848	0.002851	0.006295	0.002851	0.575609	781
TBA_APIP_MeanPerStopAtHomeBase_AP	TBA_APIP_MeanPerStopAtHomeBase_AP	91	11.8732	10.6608	9.59911	12.5262	10.8205	14.5531	6.19962	19.663	13.8277	7.79665	8.87605	13.4207	7.73771	7.11778	11.5144	16.2715	8.51119	11.8371	0.286869	0.512163	0.528781	0.076375	0.528781	0.155396	465
TBA_APIP_MeanPerLongStopAtHomeBase_AP	TBA_APIP_MeanPerLongStopAtHomeBase_AP	92	9.11209	8.8904	7.46952	9.19298	8.0259	10.901	3.24897	16.9216	11.3945	5.74225	7.17985	11.1339	6.30852	5.11517	9.37302	14.8218	6.30009	10.8909	0.439239	0.688289	0.906891	0.11303	0.906891	0.035532	398
TBA_APIP_MeanPerShortStopAtHomeBase_AP	TBA_APIP_MeanPerShortStopAtHomeBase_AP	93	2.76116	1.77041	2.1296	3.33323	2.79457	3.65215	2.95065	2.7414	2.43325	2.05441	1.6962	2.28682	1.4292	2.00262	2.14141	1.44971	2.2111	0.946229	0.002331	0.037151	0.00179	0.006917	0.00179	0.641189	370
TBA_APIP_MeanPerStopAtFeeder_AP	TBA_APIP_MeanPerStopAtFeeder_AP	94	6.20113	2.97648	4.89771	6.68515	4.55308	4.48466	5.84739	8.49042	10.7861	3.86454	1.79476	4.47381	2.35513	2.06958	2.10145	2.23363	5.53271	3.25074	0.001476	0.032156	0.004865	0.006926	0.004865	1.05892	426
TBA_APIP_MeanPerStopAtLickSpout_AP	TBA_APIP_MeanPerStopAtLickSpout_AP	95	1.81959	1.91586	1.76198	1.03986	4.33012	1.86522	1.34474	0.943324	1.46532	1.80617	1.2746	1.62159	1.2967	1.6815	1.77192	1.43666	4.47913	1.76478	0.560761	0.800054	0.858847	0.11061	0.858847	-0.074376	425
TBA_APIP_MeanPerStopAtOther_AP	TBA_APIP_MeanPerStopAtOther_AP	96	12.638	6.27588	12.9903	9.80636	17.7791	11.6641	8.913	18.1227	6.87162	14.9566	5.07364	6.50392	7.27995	5.57811	6.27308	5.89564	7.38357	6.21909	0.000311	0.067697	0.000731	0.007905	0.000731	1.00988	384
TBA_APIP_MeanPerGo_AP	TBA_APIP_MeanPerGo_AP	97	6.33078	4.7749	5.60398	6.34206	7.79258	5.84518	5.84631	5.86666	7.19036	6.15909	4.57799	5.4701	3.01442	4.86659	4.63897	5.2736	6.71456	3.64299	0.002331	0.036266	0.006148	0.007001	0.006148	0.406911	383
TBA_APIP_MeanPerFeed_AP	TBA_APIP_MeanPerFeed_AP	98	8.84775	11.5245	8.23762	7.33069	9.60027	13.7491	12.6772	5.50225	6.81296	6.872	11.8706	7.70454	10.7741	7.8639	11.1593	12.7534	12.901	17.1689	0.958508	0.939023	0.095112	0.022917	0.095112	-0.381318	385
TBA_APIP_MeanPerDrink_AP	TBA_APIP_MeanPerDrink_AP	99	0.792988	0.996221	1.24544	0.576746	0.816099	0.765112	0.843886	0.595343	0.638936	0.862342	1.05742	1.04256	1.13836	1.0923	0.98314	0.974547	0.90016	0.781276	0.989666	0.855408	0.033158	0.012542	0.033158	-0.329167	299
TBA_APIP_MeanPerAct_IP	TBA_APIP_MeanPerAct_IP	100	8.36793	7.25908	7.61975	7.33326	5.75157	7.04818	9.07851	11.5929	8.17014	10.3491	5.60808	8.40282	7.65225	3.91399	5.40462	9.602	8.8545	8.63437	0.252681	0.465104	0.277069	0.049138	0.277069	0.205083	369
TBA_APIP_MeanPerInact_IP	TBA_APIP_MeanPerInact_IP	101	91.6321	92.7409	92.3802	92.6667	94.2484	92.9518	90.9215	88.4071	91.8299	89.6509	94.3919	91.5972	92.3478	96.086	94.5954	90.398	91.1455	91.3656	0.779099	0.930704	0.277069	0.048977	0.277069	-0.017353	424
TBA_APIP_MeanPerStop_IP	TBA_APIP_MeanPerStop_IP	102	5.74726	4.51118	5.38131	4.90067	4.21655	4.80906	5.43911	8.14135	5.60837	7.48163	2.87809	5.86399	5.08032	2.12154	3.56485	5.56513	5.77231	5.24325	0.191142	0.378485	0.100063	0.023687	0.100063	0.349368	289
TBA_APIP_MeanPerStopAtHomeBase_IP	TBA_APIP_MeanPerStopAtHomeBase_IP	103	3.26169	2.91445	3.03064	2.78413	1.87283	2.82935	2.60434	5.10384	3.91915	3.94924	2.05102	3.77811	2.96306	1.34292	2.77007	3.69623	3.42103	3.29316	0.322688	0.56835	0.467836	0.072303	0.467836	0.162396	417
TBA_APIP_MeanPerLongStopAtHomeBase_IP	TBA_APIP_MeanPerLongStopAtHomeBase_IP	104	2.71263	2.55377	2.62796	2.30911	1.46478	2.21424	1.86749	4.44319	3.42991	3.34438	1.65795	3.44793	2.61129	1.10864	2.46196	3.33697	2.82496	2.9805	0.479565	0.732167	0.727366	0.097872	0.727366	0.087062	371
TBA_APIP_MeanPerShortStopAtHomeBase_IP	TBA_APIP_MeanPerShortStopAtHomeBase_IP	105	0.549058	0.360675	0.402677	0.475014	0.408052	0.615108	0.736859	0.660652	0.489236	0.604865	0.393072	0.330185	0.351772	0.234272	0.30812	0.359251	0.596069	0.312657	0.000932	0.032067	0.005414	0.006891	0.005414	0.60626	19
TBA_APIP_MeanPerStopAtFeeder_IP	TBA_APIP_MeanPerStopAtFeeder_IP	106	0.59702	0.353146	0.513059	0.615316	0.357967	0.427196	0.526347	0.882573	0.868238	0.58546	0.212478	0.575871	0.271312	0.136465	0.199906	0.375491	0.487021	0.566628	0.014064	0.075326	0.017987	0.009778	0.017987	0.757512	85
TBA_APIP_MeanPerStopAtLickSpout_IP	TBA_APIP_MeanPerStopAtLickSpout_IP	107	0.154692	0.208309	0.159899	0.140884	0.139664	0.112252	0.131144	0.189619	0.098274	0.265797	0.074524	0.243537	0.223309	0.120993	0.080116	0.241208	0.52054	0.162242	0.713131	0.896133	0.338128	0.056889	0.338128	-0.429329	97
TBA_APIP_MeanPerStopAtOther_IP	TBA_APIP_MeanPerStopAtOther_IP	108	1.73385	1.03528	1.67771	1.36035	1.84608	1.44027	2.17727	1.96532	0.722711	2.68113	0.540069	1.26647	1.62263	0.521163	0.514749	1.2522	1.34372	1.22122	0.003497	0.038079	0.01748	0.009748	0.01748	0.743965	31
TBA_APIP_MeanPerGo_IP	TBA_APIP_MeanPerGo_IP	109	0.829325	0.742447	0.640081	0.64231	0.690238	0.877014	0.989376	0.777337	0.874753	1.14349	0.677152	0.898767	0.69733	0.522781	0.517016	0.981193	0.829714	0.815626	0.252681	0.463797	0.333505	0.056818	0.333505	0.159649	180
TBA_APIP_MeanPerFeed_IP	TBA_APIP_MeanPerFeed_IP	110	1.67639	1.84796	1.43963	1.70983	0.796414	1.27913	2.54046	2.46914	1.60426	1.57223	1.92005	1.43919	1.69537	1.13445	1.22332	2.80652	2.08622	2.47852	0.677312	0.86781	0.569112	0.081118	0.569112	-0.140576	212
TBA_APIP_MeanPerDrink_IP	TBA_APIP_MeanPerDrink_IP	111	0.114958	0.157495	0.158736	0.080448	0.048368	0.082976	0.109563	0.20509	0.082757	0.151722	0.132792	0.200867	0.17923	0.135224	0.099436	0.249169	0.166263	0.096976	0.947552	0.948192	0.125128	0.027911	0.125128	-0.4542	9
TBA_APIP_MeanPerActStop	TBA_APIP_MeanPerActStop	112	66.6887	56.1711	66.5206	67.3573	67.7624	62.1456	54.5057	78.2274	69.0579	67.9326	49.1724	65.1441	56.9575	54.2112	57.1234	57.4006	56.9294	52.4299	0.002331	0.035423	0.002563	0.006932	0.002563	0.247615	563
TBA_APIP_MeanPerActStopAtHomeBase	TBA_APIP_MeanPerActStopAtHomeBase	113	25.8457	28.5413	23.958	29.1916	20.5568	28.8512	17.0821	34.1574	31.2772	21.6909	26.681	34.8334	25.2372	24.4745	32.111	36.3467	21.2354	27.4113	0.835897	0.953245	0.354238	0.058867	0.354238	-0.14313	612
TBA_APIP_MeanPerActLongStopAtHomeBase	TBA_APIP_MeanPerActLongStopAtHomeBase	114	20.0054	23.8521	19.1223	21.803	15.3911	21.7498	9.81137	29.3854	26.0734	16.7066	21.5832	29.4533	20.9663	17.8899	26.5839	33.0444	16.1832	25.1123	0.860684	0.961378	0.219155	0.042037	0.219155	-0.253728	483
TBA_APIP_MeanPerActShortStopAtHomeBase	TBA_APIP_MeanPerActShortStopAtHomeBase	115	5.84031	4.68924	4.83576	7.38861	5.16579	7.10146	7.27068	4.77196	5.20386	4.98431	5.09774	5.38013	4.27092	6.58461	5.52712	3.30228	5.05215	2.29899	0.139316	0.2975	0.091882	0.022387	0.091882	0.316689	565
TBA_APIP_MeanPerActStopAtFeeder	TBA_APIP_MeanPerActStopAtFeeder	116	12.1361	7.04958	10.4696	14.2855	8.028	8.14054	12.7751	13.6532	21.186	8.551	4.99918	10.4236	6.4703	6.50167	5.15426	4.83713	10.8828	7.12769	0.003497	0.037455	0.012595	0.008569	0.012595	0.783697	605
TBA_APIP_MeanPerActStopAtLickSpout	TBA_APIP_MeanPerActStopAtLickSpout	117	3.50771	4.57295	3.72996	2.31861	7.27924	3.36586	2.95325	1.60898	2.85223	3.95355	3.40659	3.94066	3.74246	5.28349	4.29596	3.10524	9.05273	3.75651	0.967521	0.927006	0.260298	0.04709	0.260298	-0.382597	489
TBA_APIP_MeanPerActStopAtOther	TBA_APIP_MeanPerActStopAtOther	118	25.1992	16.0072	28.363	21.5616	31.8983	21.7879	21.6953	28.8078	13.7424	33.7372	14.0856	15.9463	21.5076	17.9515	15.5621	13.1115	15.7585	14.1344	0.003497	0.036851	0.002731	0.006716	0.002731	0.654657	321
TBA_APIP_MeanPerActGo	TBA_APIP_MeanPerActGo	119	12.7572	12.023	12.0612	13.5301	13.7355	11.1867	13.5377	9.53715	14.5512	13.9183	13.0866	13.1053	9.02791	15.7949	11.6881	11.5267	13.642	8.31264	0.191142	0.377342	0.497744	0.073865	0.497744	0.085517	499
TBA_APIP_MeanPerActFeed	TBA_APIP_MeanPerActFeed	120	18.9089	29.1932	18.6875	17.807	17.0713	25.2483	30.0464	11.1237	15.0922	16.1946	34.7309	19.1395	30.771	26.3792	28.6843	28.8064	27.4693	37.5647	0.998524	0.770338	0.00313	0.006272	0.00313	-0.626568	577
TBA_APIP_MeanPerActDrink	TBA_APIP_MeanPerActDrink	121	1.64521	2.61276	2.73068	1.30565	1.43081	1.4194	1.9101	1.11183	1.29866	1.95454	3.01021	2.61112	3.24355	3.61469	2.50416	2.26628	1.95925	1.69283	0.997669	0.796966	0.005672	0.006818	0.005672	-0.667304	579
TBA_APIP_MeanPerActStop_AP	TBA_APIP_MeanPerActStop_AP	122	66.4536	55.4588	65.96	67.5372	67.273	61.544	53.5093	79.4728	69.1826	67.1497	49.0597	64.4546	55.3379	54.2828	56.0952	57.3509	55.6854	51.4043	0.003497	0.036266	0.002754	0.006476	0.002754	0.260929	564
TBA_APIP_MeanPerActStopAtHomeBase_AP	TBA_APIP_MeanPerActStopAtHomeBase_AP	123	23.8894	26.8469	21.6967	28.0155	19.4153	27.5459	14.9087	32.279	28.9505	18.3031	25.4604	33.0436	22.7414	23.5082	29.7012	35.959	18.3851	25.9759	0.835897	0.951585	0.336712	0.057005	0.336712	-0.168385	614
TBA_APIP_MeanPerActLongStopAtHomeBase_AP	TBA_APIP_MeanPerActLongStopAtHomeBase_AP	124	18.1491	22.2145	16.9075	20.5248	14.423	20.6159	7.78188	27.5794	23.8415	13.5188	20.5773	27.4101	18.4972	16.8589	24.141	32.7378	13.634	23.86	0.882751	0.966207	0.211698	0.041191	0.211698	-0.291606	613
TBA_APIP_MeanPerActShortStopAtHomeBase_AP	TBA_APIP_MeanPerActShortStopAtHomeBase_AP	125	5.74026	4.63232	4.78922	7.49076	4.9923	6.93005	7.12684	4.69956	5.10897	4.78438	4.88309	5.63348	4.24423	6.64927	5.56029	3.22113	4.75117	2.11592	0.097436	0.237569	0.117771	0.026879	0.117771	0.309381	578
TBA_APIP_MeanPerActStopAtFeeder_AP	TBA_APIP_MeanPerActStopAtFeeder_AP	126	12.8849	7.43882	10.9862	15.1025	8.18642	8.33948	14.0377	14.6028	22.7188	9.10509	5.17716	11.1119	6.99928	6.83947	5.37625	5.01462	11.7711	7.22077	0.005206	0.036976	0.014698	0.008984	0.014698	0.792532	220
TBA_APIP_MeanPerActStopAtLickSpout_AP	TBA_APIP_MeanPerActStopAtLickSpout_AP	127	3.72458	4.84397	3.97733	2.37418	7.70558	3.58381	3.22444	1.60305	3.09021	4.23806	3.67921	4.11231	3.89519	5.50066	4.65586	3.22671	9.64088	4.04091	0.958508	0.937617	0.267871	0.047979	0.267871	-0.37911	219
TBA_APIP_MeanPerActStopAtOther_AP	TBA_APIP_MeanPerActStopAtOther_AP	128	25.9548	16.3292	29.2997	22.045	31.9657	22.0748	21.3385	30.988	14.4231	35.5034	14.743	16.1868	21.702	18.4345	16.3619	13.1506	15.8883	14.1667	0.003497	0.035699	0.002871	0.00609	0.002871	0.668545	109
TBA_APIP_MeanPerActGo_AP	TBA_APIP_MeanPerActGo_AP	129	13.1814	12.2802	12.5815	14.198	13.8953	11.0626	14.0673	10.061	15.1092	14.4763	13.2692	13.5681	9.02795	16.0831	12.0212	11.7767	14.3607	8.13436	0.220901	0.424547	0.439436	0.0693	0.439436	0.102172	43
TBA_APIP_MeanPerActFeed_AP	TBA_APIP_MeanPerActFeed_AP	130	18.6713	29.6039	18.6235	16.9322	17.3512	25.9454	30.3901	9.45014	14.3605	16.3176	34.5825	19.3416	32.227	26.02	29.2993	28.6807	27.9938	38.6866	0.998524	0.76943	0.003394	0.006223	0.003394	-0.664965	813
TBA_APIP_MeanPerActDrink_AP	TBA_APIP_MeanPerActDrink_AP	131	1.69373	2.65708	2.83507	1.33266	1.48048	1.44806	2.03336	1.01612	1.34768	2.05639	3.08863	2.63569	3.40718	3.61417	2.58428	2.19179	1.96012	1.77476	0.994794	0.819722	0.008322	0.007761	0.008322	-0.649638	806
TBA_APIP_MeanPerActStop_IP	TBA_APIP_MeanPerActStop_IP	132	67.7616	59.9616	69.5069	65.58	72.7969	66.996	58.7386	69.2038	67.5775	71.6934	49.4729	68.1547	65.4082	51.8606	63.5906	56.3185	65.5269	59.3604	0.005206	0.036578	0.016827	0.009683	0.016827	0.17643	763
TBA_APIP_MeanPerActStopAtHomeBase_IP	TBA_APIP_MeanPerActStopAtHomeBase_IP	133	37.9085	38.6518	38.8294	36.5794	32.117	40.3231	27.888	43.0196	46.3433	38.1679	34.611	42.5129	38.5542	32.1878	49.0441	36.7197	39.2045	36.3806	0.520435	0.765932	0.792398	0.103782	0.792398	-0.028017	778
TBA_APIP_MeanPerActLongStopAtHomeBase_IP	TBA_APIP_MeanPerActLongStopAtHomeBase_IP	134	31.2623	33.4736	33.475	30.0633	25.0081	31.8922	19.8414	37.4535	40.1957	32.1692	27.9152	38.7773	34.1654	26.2814	43.1076	32.8231	32.4574	32.2617	0.808858	0.942141	0.472455	0.072396	0.472455	-0.098602	705
TBA_APIP_MeanPerActShortStopAtHomeBase_IP	TBA_APIP_MeanPerActShortStopAtHomeBase_IP	135	6.64616	5.17819	5.35436	6.51606	7.10894	8.43093	8.04659	5.5661	6.14759	5.99869	6.69577	3.73557	4.3888	5.90637	5.93644	3.89663	6.74708	4.11883	0.032479	0.105586	0.028423	0.011346	0.028423	0.360074	694
TBA_APIP_MeanPerActStopAtFeeder_IP	TBA_APIP_MeanPerActStopAtFeeder_IP	136	7.36226	4.631	6.94775	8.63034	6.29566	6.19298	6.06145	7.80592	11.3565	5.60744	3.79557	6.87401	3.43281	3.48702	3.66344	4.03357	5.18736	6.57421	0.005206	0.036189	0.005582	0.006941	0.005582	0.668825	683
TBA_APIP_MeanPerActStopAtLickSpout_IP	TBA_APIP_MeanPerActStopAtLickSpout_IP	137	1.88086	2.67719	2.0556	2.00705	2.47423	1.50486	1.50435	1.7043	1.25881	2.53771	1.28041	2.89933	2.88397	3.17398	1.45188	2.46107	5.35134	1.91551	0.902564	0.96684	0.121934	0.027597	0.121934	-0.509322	706
TBA_APIP_MeanPerActStopAtOther_IP	TBA_APIP_MeanPerActStopAtOther_IP	138	20.6101	14.0016	21.6742	18.3632	31.91	18.9751	23.2848	16.674	8.61888	25.3804	9.78595	15.8685	20.5372	13.0119	9.43125	13.1042	15.7837	14.4901	0.014064	0.074714	0.02941	0.011445	0.02941	0.557757	695
TBA_APIP_MeanPerActGo_IP	TBA_APIP_MeanPerActGo_IP	139	10.1931	10.6559	8.5498	8.77866	12.0308	12.392	10.7897	6.64683	11.1497	11.2076	12.1308	10.8783	9.10554	13.6661	9.8154	10.4344	9.28648	9.9299	0.600777	0.833487	0.612343	0.08581	0.612343	-0.064051	684
TBA_APIP_MeanPerActFeed_IP	TBA_APIP_MeanPerActFeed_IP	140	20.6924	27.023	19.8757	24.5329	14.3636	19.3412	29.1906	22.3252	20.2856	15.6245	35.9613	18.4815	22.981	30.8286	24.5636	30.5273	23.3135	29.5268	0.989666	0.854278	0.029142	0.011423	0.029142	-0.385083	737
TBA_APIP_MeanPerActDrink_IP	TBA_APIP_MeanPerActDrink_IP	141	1.3528	2.35956	2.06763	1.10844	0.808678	1.27076	1.28115	1.82413	0.987125	1.47448	2.43501	2.48553	2.50526	3.64466	2.03032	2.71974	1.8731	1.18287	0.997669	0.795992	0.004001	0.006559	0.004001	-0.802572	715
SA_DCLC_InactThresh_ms	SA_DCLC_InactThresh_ms	142	441096	591651	400312	488511	400312	487775	199474	501453	715731	335203	442413	660030	597196	296464	595830	758653	490959	891664	0.958508	0.936216	0.096012	0.02298	0.096012	-0.423653	726
SA_DCLC_MeanActPhaseOnsetCumCT_ms	SA_DCLC_MeanActPhaseOnsetCumCT_ms	143	4.33795e+07	4.36831e+07	4.3409e+07	43335529	43423568	43690627	4.31528e+07	4.34229e+07	43049055	43552485	4.37421e+07	4.36688e+07	43894214	4.36474e+07	43542728	4.34507e+07	4.36856e+07	4.3833e+07	0.997669	0.795022	0.004095	0.006612	0.004095	-0.010061	33
SA_DCLC_MeanActPhaseOffsetCumCT_ms	SA_DCLC_MeanActPhaseOffsetCumCT_ms	144	8.60319e+07	8.5426e+07	8.62588e+07	85932865	8.58398e+07	86105079	86580762	8.65457e+07	8.43125e+07	86679565	8.50494e+07	8.53733e+07	8.45994e+07	8.49423e+07	8.59137e+07	8.591e+07	8.57701e+07	8.58502e+07	0.014064	0.074111	0.082515	0.021305	0.082515	0.010195	99
SA_DCLC_MeanActPhaseDur_ms	SA_DCLC_MeanActPhaseDur_ms	145	42652379	4.1743e+07	4.28499e+07	42597336	4.24162e+07	42414452	4.34279e+07	43122724	4.12634e+07	43127080	41307312	4.17045e+07	4.07052e+07	41294904	4.23709e+07	42459260	4.20845e+07	4.20172e+07	0.007382	0.045504	0.012838	0.008573	0.012838	0.031093	575
SA_DCLC_MeanInactPhaseDur_ms	SA_DCLC_MeanInactPhaseDur_ms	146	3.73611e+07	3.81794e+07	3.65716e+07	3.79101e+07	3.80912e+07	3.7867e+07	3.68535e+07	3.67207e+07	3.858e+07	3.62944e+07	3.85361e+07	3.77169e+07	3.87163e+07	3.92125e+07	3.79105e+07	3.73193e+07	3.81969e+07	3.78262e+07	0.958508	0.934819	0.043802	0.015139	0.043802	-0.031257	498
SA_DCLC_MeanTotActDur_ms	SA_DCLC_MeanTotActDur_ms	147	2.4033e+07	1.96096e+07	2.19449e+07	2.18388e+07	26250199	2.544e+07	2.13745e+07	2.98459e+07	2.3579e+07	2.19907e+07	1.69887e+07	20453502	1.7279e+07	1.45742e+07	1.87013e+07	2.29139e+07	23395914	2.257e+07	0.018959	0.086633	0.012747	0.008619	0.012747	0.29346	319
SA_DCLC_MeanTotActMove_cm	SA_DCLC_MeanTotActMove_cm	148	38653.1	24233.2	37668.9	38812.6	49250.1	34673.2	38300.8	39291.8	36671.5	34555.9	19237.5	24361.6	15059.5	19960.2	27158.9	24650.9	46134	17303	0.003497	0.03515	0.002022	0.006629	0.002022	0.6736	603
SA_DCLC_MeanTotActChow_mg	SA_DCLC_MeanTotActChow_mg	149	3310	3561.79	3113.33	3260	3766.67	3626.67	3406.67	3193.33	3100	3013.33	3526.67	3386.67	3813.33	3466.67	3486.67	3407.69	3646.67	3760	0.981041	0.895325	0.03906	0.013764	0.03906	-0.105773	561
SA_DCLC_MeanTotActLiquid_mg	SA_DCLC_MeanTotActLiquid_mg	150	3669.17	4170.77	3620	3546.67	3846.67	4186.67	3760	3533.33	3466.67	3393.33	3880	4293.33	3886.67	4580	4053.33	4246.15	4400	4026.67	0.999456	0.763843	0.001439	0.00677	0.001439	-0.184861	488
SA_DCLC_MeanTotInactDur_ms	SA_DCLC_MeanTotInactDur_ms	151	5.59804e+07	6.03128e+07	5.74765e+07	5.86687e+07	5.42572e+07	5.48415e+07	5.8907e+07	49997510	5.62644e+07	5.74307e+07	6.28548e+07	5.89679e+07	6.21424e+07	6.59332e+07	6.15802e+07	5.68647e+07	5.68855e+07	5.72734e+07	0.985936	0.877726	0.015336	0.009017	0.015336	-0.107541	481
SA_DCLC_MeanTotInactMove_cm	SA_DCLC_MeanTotInactMove_cm	152	942.44	1113.05	807.177	815.744	824.906	1204.44	1346.75	918.855	844.567	777.088	966.825	1121.64	1044.41	1331.47	1319.26	1148.77	1049.16	922.863	0.975058	0.915435	0.085355	0.021575	0.085355	-0.240045	87
SA_DCLC_MeanActNum	SA_DCLC_MeanActNum	153	20.8167	17.4006	20.4667	18.1333	21.7333	19.5333	24.8	26.1333	13.4667	22.2667	21.3333	18.6	16.5333	18.5333	15.4	19.5385	15.9333	13.3333	0.032479	0.105064	0.060143	0.017537	0.060143	0.258599	21
SA_DCLC_MeanActRate_onhr	SA_DCLC_MeanActRate_onhr	154	0.939861	0.784689	0.928977	0.814081	0.972049	0.882055	1.11515	1.17813	0.613201	1.01524	0.965619	0.843374	0.750895	0.825015	0.692535	0.881323	0.718884	0.599869	0.024942	0.09531	0.057702	0.017197	0.057702	0.260325	235
SA_DCLC_MeanActDur_ms	SA_DCLC_MeanActDur_ms	155	1.19116e+06	1.15946e+06	1.07223e+06	1.20434e+06	1.20783e+06	1.30239e+06	861874	1.14206e+06	1.75092e+06	987607	796344	1.09965e+06	1.0451e+06	786378	1.21437e+06	1.17276e+06	1.46836e+06	1.69275e+06	0.399223	0.655449	0.829129	0.10768	0.829129	0.038905	74
SA_DCLC_MeanActMove_cm	SA_DCLC_MeanActMove_cm	156	1918.13	1427.22	1840.5	2140.4	2266.11	1775.08	1544.39	1503.51	2723.13	1551.91	901.759	1309.76	910.855	1076.99	1763.57	1261.66	2895.44	1297.73	0.014064	0.073518	0.097614	0.02326	0.097614	0.426493	140
SA_DCLC_MeanActChow_mg	SA_DCLC_MeanActChow_mg	157	164.495	209.597	152.117	179.779	173.313	185.666	137.366	122.194	230.198	135.329	165.312	182.079	230.645	187.05	226.407	174.409	228.87	282	0.985936	0.876532	0.029562	0.011463	0.029562	-0.34957	346
SA_DCLC_MeanActLiquid_mg	SA_DCLC_MeanActLiquid_mg	158	182.553	244.197	176.873	195.588	176.994	214.334	151.613	135.204	257.426	152.395	181.875	230.824	235.081	247.122	263.203	217.323	276.151	302	0.997669	0.794053	0.006203	0.006918	0.006203	-0.419729	451
SA_DCLC_MeanInactNum	SA_DCLC_MeanInactNum	159	21.6	18.1705	21.2667	19	22.4667	20.2667	25.6667	26.7333	14.2667	23.1333	22.0667	19.4	17.3333	19.4	16.1333	20.2308	16.6	14.2	0.024942	0.094755	0.057596	0.017212	0.057596	0.249432	336
SA_DCLC_MeanInactRate_onhr	SA_DCLC_MeanInactRate_onhr	160	0.975423	0.819755	0.966009	0.853039	1.0053	0.914779	1.15467	1.20503	0.649436	1.05512	0.999181	0.880079	0.787669	0.863712	0.72648	0.912703	0.748484	0.639729	0.024942	0.094208	0.055368	0.016969	0.055368	0.250835	477
SA_DCLC_MeanInactDur_ms	SA_DCLC_MeanInactDur_ms	161	2.68789e+06	3.36996e+06	2.70266e+06	3.08782e+06	2.41501e+06	2.70599e+06	2.29508e+06	1.87023e+06	3.94377e+06	2.4826e+06	2.8484e+06	3.03958e+06	3.58514e+06	3.39862e+06	3.81695e+06	2.8108e+06	3.42684e+06	4.03334e+06	0.992618	0.829434	0.023904	0.01047	0.023904	-0.326255	437
SA_DCLC_MeanInactMove_cm	SA_DCLC_MeanInactMove_cm	162	44.5834	62.1582	37.955	42.9339	36.7169	59.4294	52.4707	34.3712	59.1986	33.5917	43.8138	57.8165	60.2545	68.6325	81.7724	56.7831	63.2025	64.9904	0.997669	0.793087	0.005997	0.007052	0.005997	-0.479437	450
SA_DCLC_DC_MeanTotActDur_ms	SA_DCLC_DC_MeanTotActDur_ms	163	2.09841e+07	1.69265e+07	1.91817e+07	1.91684e+07	2.40935e+07	2.28996e+07	1.80299e+07	25602896	2.05887e+07	1.83081e+07	1.49355e+07	1.74081e+07	1.45351e+07	13095286	1.66325e+07	1.93984e+07	2.00849e+07	1.9322e+07	0.018959	0.086031	0.009921	0.00832	0.009921	0.310014	345
SA_DCLC_DC_MeanTotActMove_cm	SA_DCLC_DC_MeanTotActMove_cm	164	35427.1	21881.6	34809.6	36256.6	46149	31599.1	34177	35988.1	33970.5	30466.7	17462.3	21924.5	13101.1	18510.2	25058.8	21618.4	42317.9	15059.2	0.003497	0.034618	0.002275	0.007033	0.002275	0.695136	436
SA_DCLC_DC_MeanTotActChow_mg	SA_DCLC_DC_MeanTotActChow_mg	165	2739.11	3099.75	2591.48	2624.5	3479.41	3319.01	2716.65	2218.16	2504.09	2459.6	3088.24	2903.6	3297.79	3052.58	3167.21	2871.64	3141.73	3275.19	0.958508	0.933425	0.044417	0.015303	0.044417	-0.178441	476
SA_DCLC_DC_MeanTotActLiquid_mg	SA_DCLC_DC_MeanTotActLiquid_mg	166	3304.14	3752.02	3271.92	3189.44	3658.2	3913.3	3444.72	2826.59	3153.23	2975.69	3570.32	3775.9	3508.53	4173.15	3751.48	3573.7	3905.78	3757.34	0.992618	0.828375	0.008806	0.007873	0.008806	-0.183396	335
SA_DCLC_DC_MeanTotInactDur_ms	SA_DCLC_DC_MeanTotInactDur_ms	167	2.22789e+07	2.63365e+07	2.40823e+07	2.40936e+07	1.91685e+07	2.03664e+07	2.52361e+07	17657104	2.26713e+07	2.49559e+07	2.83245e+07	2.58559e+07	2.87289e+07	30166714	2.66335e+07	23863870	2.31811e+07	2.3938e+07	0.985936	0.875341	0.009928	0.007898	0.009928	-0.241388	464
SA_DCLC_DC_MeanTotInactMove_cm	SA_DCLC_DC_MeanTotInactMove_cm	168	609.765	697.4	565.227	497.931	558.33	785.347	841.41	552.054	501.537	576.284	619.342	695.064	699.458	826.083	848.738	710.284	657.322	522.906	0.947552	0.946742	0.16026	0.03315	0.16026	-0.193732	410
SA_DCLC_DC_MeanActNum	SA_DCLC_DC_MeanActNum	169	14.7083	12.1071	15	13.2	16	14.7333	17.2667	15.6	8.2	17.6667	15.1333	12.4	11.6	14	11.1333	12.9231	10.6	9.06667	0.018959	0.085438	0.057748	0.017163	0.057748	0.280786	356
SA_DCLC_DC_MeanActRate_onhr	SA_DCLC_DC_MeanActRate_onhr	170	1.23774	1.04626	1.26063	1.114	1.35796	1.25023	1.42952	1.30354	0.715847	1.47022	1.32229	1.07155	1.02686	1.22403	0.944354	1.0971	0.906529	0.777399	0.024942	0.093666	0.088261	0.0219	0.088261	0.242465	728
SA_DCLC_DC_MeanActDur_ms	SA_DCLC_DC_MeanActDur_ms	171	1.44445e+06	1.42619e+06	1.26528e+06	1.38488e+06	1.49017e+06	1.55284e+06	1.04033e+06	1.58951e+06	2.17181e+06	1.06077e+06	985451	1.38344e+06	1.25611e+06	931634	1.4542e+06	1.48821e+06	1.83627e+06	2.07424e+06	0.322688	0.566822	0.923895	0.11449	0.923895	0.018348	731
SA_DCLC_DC_MeanActMove_cm	SA_DCLC_DC_MeanActMove_cm	172	2373.56	1826.08	2253.45	2568.75	2829.82	2143.57	1916.54	2184.37	3344.8	1747.16	1143.24	1757.47	1125.13	1316	2167.75	1663.97	3788.91	1646.18	0.018959	0.084853	0.147618	0.031252	0.147618	0.378301	738
SA_DCLC_DC_MeanActChow_mg	SA_DCLC_DC_MeanActChow_mg	173	188.396	257.746	169.298	189.429	214.295	223.39	156.468	139.089	275.643	139.556	202.469	228.486	282.931	215.691	277.939	220.166	286.273	348.015	0.996503	0.806885	0.012469	0.008592	0.012469	-0.452183	699
SA_DCLC_DC_MeanActLiquid_mg	SA_DCLC_DC_MeanActLiquid_mg	174	225.485	310.338	213.552	227.494	225.599	262.267	196.43	174.698	336.556	167.28	234.339	298.503	300.111	294.014	324.528	275.588	354.132	401.487	0.997669	0.792124	0.00601	0.006991	0.00601	-0.46081	697
SA_DCLC_DC_MeanInactNum	SA_DCLC_DC_MeanInactNum	175	14.675	12.1545	14.9333	13.2	15.9333	14.5333	17.2	15.6	8.66667	17.3333	15.2667	12.4	11.8	14.0667	11.2	12.7692	10.7333	9	0.018959	0.084275	0.054803	0.017036	0.054803	0.271871	803
SA_DCLC_DC_MeanInactRate_onhr	SA_DCLC_DC_MeanInactRate_onhr	176	1.23589	1.0509	1.25568	1.11444	1.35299	1.23413	1.42467	1.30398	0.756956	1.44426	1.33431	1.07309	1.04397	1.23033	0.950635	1.08432	0.917901	0.772642	0.024942	0.093131	0.085869	0.021604	0.085869	0.233923	69
SA_DCLC_DC_MeanInactDur_ms	SA_DCLC_DC_MeanInactDur_ms	177	1.81288e+06	2.58368e+06	1.77543e+06	2.05977e+06	1.48689e+06	1.56301e+06	1.53443e+06	1.16727e+06	3.40878e+06	1.50742e+06	2.10968e+06	2.26743e+06	2.77636e+06	2.69386e+06	2.72309e+06	2.18143e+06	2.67636e+06	3.24125e+06	0.996503	0.805886	0.015284	0.009035	0.015284	-0.511149	135
SA_DCLC_DC_MeanInactMove_cm	SA_DCLC_DC_MeanInactMove_cm	178	44.1208	62.0256	38.5338	39.9979	35.9943	55.2075	49.337	36.1079	64.5054	33.2827	42.839	57.908	61.3584	65.397	81.125	58.9237	64.8491	63.805	0.997669	0.791162	0.005215	0.006965	0.005215	-0.491406	63
SA_DCLC_LC_MeanTotActDur_ms	SA_DCLC_LC_MeanTotActDur_ms	179	3.0489e+06	2.68306e+06	2.76323e+06	2.6704e+06	2.15671e+06	2.54039e+06	3.34452e+06	4.24303e+06	2.99031e+06	3.68262e+06	2.05312e+06	3.04537e+06	2.74388e+06	1.47892e+06	2.06882e+06	3.51545e+06	3.311e+06	3.24796e+06	0.220901	0.423302	0.317103	0.054801	0.317103	0.184407	129
SA_DCLC_LC_MeanTotActMove_cm	SA_DCLC_LC_MeanTotActMove_cm	180	3224.47	2350.53	2857.73	2554.67	3100.11	3072.79	4121.26	3302.04	2699.8	4087.34	1774.43	2435.62	1957.69	1449.19	2098.55	3031.57	3814.66	2242.51	0.007382	0.045078	0.021934	0.010141	0.021934	0.456076	119
SA_DCLC_LC_MeanTotActChow_mg	SA_DCLC_LC_MeanTotActChow_mg	181	570.886	462.048	521.851	635.501	287.252	307.652	690.014	975.17	595.914	553.737	438.427	483.066	515.543	414.088	319.457	536.051	504.941	484.812	0.06519	0.175301	0.201456	0.039626	0.201456	0.305161	53
SA_DCLC_LC_MeanTotActLiquid_mg	SA_DCLC_LC_MeanTotActLiquid_mg	182	365.031	418.745	348.085	357.226	188.462	273.371	315.279	706.748	313.432	417.648	309.682	517.429	378.14	406.847	301.854	672.457	494.224	269.328	0.747319	0.921376	0.470812	0.072452	0.470812	-0.198052	139
SA_DCLC_LC_MeanTotInactDur_ms	SA_DCLC_LC_MeanTotInactDur_ms	183	3.37015e+07	3.39762e+07	3.33942e+07	3.4575e+07	35088727	3.44751e+07	3.36709e+07	32340406	3.35931e+07	3.24748e+07	3.45303e+07	3.31121e+07	3.34136e+07	3.57665e+07	3.49466e+07	3.30008e+07	33704438	33335482	0.639549	0.858127	0.587463	0.083076	0.587463	-0.011711	73
SA_DCLC_LC_MeanTotInactMove_cm	SA_DCLC_LC_MeanTotInactMove_cm	184	332.709	415.677	241.97	317.84	266.642	419.09	505.328	366.912	343.084	200.81	347.519	426.557	345.027	505.418	470.531	438.523	391.883	399.954	0.981041	0.894076	0.058578	0.017315	0.058578	-0.321199	400
SA_DCLC_LC_MeanActNum	SA_DCLC_LC_MeanActNum	185	6.10833	5.29359	5.46667	4.93333	5.73333	4.8	7.53333	10.5333	5.26667	4.6	6.2	6.2	4.93333	4.53333	4.26667	6.61538	5.33333	4.26667	0.220901	0.422064	0.316508	0.054785	0.316508	0.206532	310
SA_DCLC_LC_MeanActRate_onhr	SA_DCLC_LC_MeanActRate_onhr	186	0.587879	0.490631	0.537358	0.462796	0.530929	0.457931	0.735366	1.0288	0.496727	0.453125	0.574114	0.580884	0.459892	0.401544	0.395892	0.623346	0.499719	0.389653	0.220901	0.420834	0.233665	0.043963	0.233665	0.260882	770
SA_DCLC_LC_MeanActDur_ms	SA_DCLC_LC_MeanActDur_ms	187	618978	564737	542515	721285	419898	533636	452854	479394	1.0956e+06	706639	334760	532073	548955	337794	588561	556522	737157	882076	0.520435	0.76421	0.603008	0.084831	0.603008	0.132309	771
SA_DCLC_LC_MeanActMove_cm	SA_DCLC_LC_MeanActMove_cm	188	847.811	541.77	707.411	994.279	692.951	644.013	691.395	495.156	1755.23	802.053	312.346	414.338	407.022	338.866	708.906	475.746	1119.67	557.267	0.024942	0.092602	0.089494	0.022155	0.089494	0.64606	760
SA_DCLC_LC_MeanActChow_mg	SA_DCLC_LC_MeanActChow_mg	189	107.131	100.457	104.976	153.961	58.9438	69.8719	93.5826	97.1718	159.442	119.096	74.619	89.2638	107.702	98.6021	91.9396	85.025	114.783	141.719	0.360451	0.607044	0.657267	0.090465	0.657267	0.092795	749
SA_DCLC_LC_MeanActLiquid_mg	SA_DCLC_LC_MeanActLiquid_mg	190	81.2574	94.0254	76.2305	110.218	41.3511	67.2068	48.8894	76.7127	134.223	95.2274	53.8171	95.4664	82.1716	102.308	103.184	103.503	121.163	90.5895	0.882751	0.964591	0.342907	0.057604	0.342907	-0.210552	761
SA_DCLC_LC_MeanInactNum	SA_DCLC_LC_MeanInactNum	191	6.925	6.01603	6.33333	5.8	6.53333	5.73333	8.46667	11.1333	5.6	5.8	6.8	7	5.53333	5.33333	4.93333	7.46154	5.86667	5.2	0.164103	0.338269	0.252832	0.046125	0.252832	0.203003	750
SA_DCLC_LC_MeanInactRate_onhr	SA_DCLC_LC_MeanInactRate_onhr	192	0.672185	0.563729	0.629703	0.552851	0.604779	0.554471	0.832092	1.08827	0.524522	0.590798	0.638645	0.664229	0.517378	0.477125	0.465258	0.711375	0.548947	0.486879	0.097436	0.236686	0.176169	0.035294	0.176169	0.253856	812
SA_DCLC_LC_MeanInactDur_ms	SA_DCLC_LC_MeanInactDur_ms	193	4.68281e+06	4.98424e+06	4.88895e+06	5.42753e+06	4.6785e+06	5.60332e+06	3.84034e+06	2.85522e+06	4.77171e+06	5396921	4.50692e+06	4.4074e+06	5.30988e+06	5.25744e+06	6.30032e+06	3.88786e+06	4.79987e+06	5.40427e+06	0.600777	0.831721	0.485172	0.072396	0.485172	-0.09	790
SA_DCLC_LC_MeanInactMove_cm	SA_DCLC_LC_MeanInactMove_cm	194	46.3865	62.7897	36.5902	49.6158	38.4792	70.1314	58.8369	31.9377	50.9858	34.5151	46.0023	57.6543	57.9005	77.1662	83.242	53.1198	60.1901	67.042	0.985936	0.874154	0.023534	0.010349	0.023534	-0.436822	801
SA_APIP_AP_MeanTotActDur_ms	SA_APIP_AP_MeanTotActDur_ms	195	2.14865e+07	1.722e+07	1.96232e+07	19471108	24385272	2.33721e+07	1.87604e+07	2.61653e+07	2.09301e+07	1.91843e+07	1.50842e+07	17856808	1.47578e+07	1.31964e+07	1.70428e+07	1.96547e+07	2.04076e+07	1.97602e+07	0.018959	0.083706	0.007417	0.007361	0.007417	0.319339	207
SA_APIP_AP_MeanTotActMove_cm	SA_APIP_AP_MeanTotActMove_cm	196	36067.1	22150.3	35352.4	36492.4	46527.2	32284.2	35438.3	36489.6	34326	31626.8	17573.3	22450.6	13221.2	18617.4	25500.5	21818.2	42737.9	15283.5	0.003497	0.034101	0.001876	0.006546	0.001876	0.703357	169
SA_APIP_AP_MeanTotActChow_mg	SA_APIP_AP_MeanTotActChow_mg	197	2788.66	3134.15	2639.19	2671.27	3502.21	3337.76	2780.34	2265.73	2596.01	2516.78	3101.42	2942.38	3348.81	3075.39	3228.05	2898.66	3177.7	3300.76	0.967521	0.925649	0.04724	0.015773	0.04724	-0.1685	208
SA_APIP_AP_MeanTotActLiquid_mg	SA_APIP_AP_MeanTotActLiquid_mg	198	3352.27	3794.52	3324.46	3236.24	3682.24	3943.49	3526.94	2887.52	3200.22	3017.08	3605.86	3850.31	3551.96	4177.19	3816.71	3602.8	3951.85	3799.49	0.994794	0.818689	0.008281	0.007858	0.008281	-0.178779	170
SA_APIP_AP_MeanTotInactDur_ms	SA_APIP_AP_MeanTotInactDur_ms	199	2.11659e+07	2.45229e+07	2.32267e+07	23126228	1.8031e+07	1.90423e+07	2.46675e+07	1.69574e+07	20333364	2.39427e+07	2.62231e+07	2.38477e+07	2.59473e+07	2.80985e+07	25328184	2.28046e+07	2.16769e+07	2.2257e+07	0.975058	0.914122	0.022382	0.010131	0.022382	-0.212388	201
SA_APIP_AP_MeanTotInactMove_cm	SA_APIP_AP_MeanTotInactMove_cm	200	579.446	643.087	545.498	467.925	534.055	734.831	822.605	529.69	446.555	554.41	572	648.322	636.168	746.81	785.873	679.444	595.121	480.957	0.93481	0.957434	0.287932	0.050404	0.287932	-0.150339	175
SA_APIP_AP_MeanActNum	SA_APIP_AP_MeanActNum	201	15.0583	12.3929	15.3333	13.5333	16.2	14.9333	17.8	16	8.73333	17.9333	15.4	12.7333	11.8667	14.2	11.5333	13.0769	11	9.33333	0.018959	0.083144	0.048985	0.015772	0.048985	0.281043	202
SA_APIP_AP_MeanActRate_onhr	SA_APIP_AP_MeanActRate_onhr	202	1.2672	1.07062	1.28843	1.14204	1.37479	1.26683	1.47342	1.33671	0.762509	1.49286	1.34539	1.10044	1.04929	1.24143	0.978111	1.10998	0.939794	0.800552	0.024942	0.092079	0.075435	0.019953	0.075435	0.243192	176
SA_APIP_AP_MeanActDur_ms	SA_APIP_AP_MeanActDur_ms	203	1.49306e+06	1.43849e+06	1.27977e+06	1.43875e+06	1.50526e+06	1.5651e+06	1.05395e+06	1.63533e+06	2.39657e+06	1.06976e+06	979491	1.40237e+06	1.24364e+06	929325	1.4777e+06	1.503e+06	1.85523e+06	2.11716e+06	0.322688	0.565302	0.796395	0.104054	0.796395	0.05372	227
SA_APIP_AP_MeanActMove_cm	SA_APIP_AP_MeanActMove_cm	204	2500.19	1841.47	2305.59	2696.48	2872.05	2161.89	1990.92	2280.6	3930.45	1763.58	1141.12	1763.13	1114.15	1311.08	2211.03	1668.45	3885.26	1637.51	0.010334	0.058719	0.12103	0.027507	0.12103	0.441185	232
SA_APIP_AP_MeanActChow_mg	SA_APIP_AP_MeanActChow_mg	205	193.075	259.417	172.121	197.385	216.186	223.511	156.199	141.608	297.253	140.341	201.391	231.077	282.203	216.577	279.889	221.662	288.882	353.653	0.989666	0.853151	0.022779	0.010183	0.022779	-0.426107	252
SA_APIP_AP_MeanActLiquid_mg	SA_APIP_AP_MeanActLiquid_mg	206	232.575	312.85	216.813	239.131	227.299	264.073	198.142	180.47	366.437	168.239	234.147	302.38	299.323	294.168	330.929	275.508	359.259	407.088	0.994794	0.817659	0.014895	0.008952	0.014895	-0.427774	247
SA_APIP_AP_MeanInactNum	SA_APIP_AP_MeanInactNum	207	14.0583	11.3929	14.3333	12.5333	15.2	13.9333	16.8	15	7.73333	16.9333	14.4	11.7333	10.8667	13.2	10.5333	12.0769	10	8.33333	0.018959	0.08259	0.048985	0.015725	0.048985	0.303284	160
SA_APIP_AP_MeanInactRate_onhr	SA_APIP_AP_MeanInactRate_onhr	208	1.18269	0.984249	1.20434	1.05747	1.28984	1.18183	1.39045	1.25318	0.675178	1.40922	1.25816	1.01393	0.96061	1.15413	0.893067	1.02516	0.854131	0.714799	0.024942	0.091561	0.073572	0.019799	0.073572	0.264976	159
SA_APIP_AP_MeanInactDur_ms	SA_APIP_AP_MeanInactDur_ms	209	1.58258e+06	2.18767e+06	1.62047e+06	1.84518e+06	1.18625e+06	1.36667e+06	1.46831e+06	1.1305e+06	2.62931e+06	1.41394e+06	1.82105e+06	2.03247e+06	2.38779e+06	2.12867e+06	2.40457e+06	1.88828e+06	2.16769e+06	2.67085e+06	0.996503	0.80489	0.008462	0.007824	0.008462	-0.46712	153
SA_APIP_AP_MeanInactMove_cm	SA_APIP_AP_MeanInactMove_cm	210	42.2536	57.2739	38.058	37.3344	35.1352	52.739	48.9646	35.3127	57.7442	32.7408	39.7222	55.2547	58.5431	56.5765	74.6082	56.2597	59.5121	57.7148	0.997669	0.790203	0.006642	0.006843	0.006642	-0.438803	154
SA_APIP_IP_MeanTotActDur_ms	SA_APIP_IP_MeanTotActDur_ms	211	2.54654e+06	2.38951e+06	2.32176e+06	2.36766e+06	1864927	2.06785e+06	2.61408e+06	3.68065e+06	2.64897e+06	2.80639e+06	1.9045e+06	2596694	2.52117e+06	1.3778e+06	1.65851e+06	3.25921e+06	2.98834e+06	2.80983e+06	0.439239	0.686642	0.617381	0.086292	0.617381	0.091822	218
SA_APIP_IP_MeanTotActMove_cm	SA_APIP_IP_MeanTotActMove_cm	212	2585.99	2082.88	2316.56	2320.25	2722.86	2388.95	2862.47	2802.24	2345.55	2929.02	1664.27	1910.99	1838.24	1342.77	1658.42	2832.69	3396.13	2019.55	0.032479	0.104546	0.073361	0.019791	0.073361	0.312133	217
SA_APIP_IP_MeanTotActChow_mg	SA_APIP_IP_MeanTotActChow_mg	213	521.34	427.649	474.146	588.728	264.457	288.91	626.327	927.606	503.992	496.553	425.246	444.29	464.527	391.279	258.612	509.03	468.968	459.242	0.06519	0.174582	0.25221	0.046089	0.25221	0.285795	186
SA_APIP_IP_MeanTotActLiquid_mg	SA_APIP_IP_MeanTotActLiquid_mg	214	316.895	376.248	295.539	310.427	164.427	243.179	233.065	645.817	266.449	376.255	274.139	443.025	334.706	402.814	236.625	643.351	448.147	227.175	0.835897	0.94993	0.42019	0.067545	0.42019	-0.247678	185
SA_APIP_IP_MeanTotInactDur_ms	SA_APIP_IP_MeanTotInactDur_ms	215	3.48145e+07	3.57898e+07	3.42498e+07	3.55424e+07	3.62263e+07	3.57991e+07	3.42394e+07	3.30401e+07	3.5931e+07	3.3488e+07	3.66316e+07	3.51203e+07	3.61951e+07	3.78347e+07	3.6252e+07	3.40601e+07	3.52086e+07	3.50164e+07	0.919736	0.967783	0.12445	0.027874	0.12445	-0.039861	192
SA_APIP_IP_MeanTotInactMove_cm	SA_APIP_IP_MeanTotInactMove_cm	216	362.994	469.963	261.678	347.82	290.851	469.604	524.143	389.165	398.012	222.677	394.825	473.318	408.244	584.661	533.388	469.322	454.041	441.906	0.985936	0.872969	0.025345	0.010837	0.025345	-0.372602	191
SA_APIP_IP_MeanActNum	SA_APIP_IP_MeanActNum	217	5.75833	5.00769	5.13333	4.6	5.53333	4.6	7	10.1333	4.73333	4.33333	5.93333	5.86667	4.66667	4.33333	3.86667	6.46154	4.93333	4	0.252681	0.462498	0.348192	0.05813	0.348192	0.201505	224
SA_APIP_IP_MeanActRate_onhr	SA_APIP_IP_MeanActRate_onhr	218	0.551545	0.462144	0.50319	0.431451	0.506324	0.438128	0.680002	0.986724	0.441057	0.425484	0.551471	0.547025	0.432409	0.384047	0.354656	0.606942	0.457351	0.363248	0.220901	0.41961	0.263736	0.047474	0.263736	0.255137	223
SA_APIP_IP_MeanActDur_ms	SA_APIP_IP_MeanActDur_ms	219	462187	482917	452291	514709	337035	449532	373440	363222	559641	647629	320984	442618	540251	317954	428926	504401	605745	702458	0.520435	0.762497	0.737124	0.097846	0.737124	-0.063298	817
SA_APIP_IP_MeanActMove_cm	SA_APIP_IP_MeanActMove_cm	220	478.004	421.325	451.278	504.402	492.083	519.338	408.924	276.537	495.539	675.927	280.494	325.737	393.909	309.871	428.903	438.393	688.404	504.887	0.164103	0.337205	0.369209	0.060336	0.369209	0.182088	819
SA_APIP_IP_MeanActChow_mg	SA_APIP_IP_MeanActChow_mg	221	91.629	86.5964	92.366	127.984	47.7934	62.8064	89.4753	91.5401	106.477	114.589	71.6707	75.7313	99.5415	90.2951	66.8824	78.7785	95.061	114.811	0.360451	0.605484	0.651701	0.090042	0.651701	0.081497	800
SA_APIP_IP_MeanActLiquid_mg	SA_APIP_IP_MeanActLiquid_mg	222	55.9731	74.3494	57.5725	67.4842	29.7157	52.8651	33.295	63.7319	56.2921	86.8282	46.2031	75.5156	71.7226	92.957	61.196	99.5663	90.8407	56.7937	0.967521	0.924295	0.069553	0.019097	0.069553	-0.409588	789
SA_APIP_IP_MeanInactNum	SA_APIP_IP_MeanInactNum	223	7.54167	6.77756	6.93333	6.46667	7.26667	6.33333	8.86667	11.7333	6.53333	6.2	7.66667	7.66667	6.46667	6.2	5.6	8.15385	6.6	5.86667	0.252681	0.461206	0.324519	0.055904	0.324519	0.154117	811
SA_APIP_IP_MeanInactRate_onhr	SA_APIP_IP_MeanInactRate_onhr	224	0.731465	0.636527	0.690005	0.615384	0.677139	0.607831	0.871411	1.14874	0.616797	0.62442	0.720855	0.727805	0.608473	0.560052	0.529347	0.776486	0.61835	0.550852	0.164103	0.336148	0.224523	0.042464	0.224523	0.200567	769
SA_APIP_IP_MeanInactDur_ms	SA_APIP_IP_MeanInactDur_ms	225	4.83154e+06	5.37657e+06	4.93988e+06	5.49625e+06	4.98527e+06	5.6525e+06	3.86159e+06	2.81591e+06	5.49965e+06	5.40128e+06	4.77804e+06	4.5809e+06	5.59718e+06	6.10238e+06	6.47357e+06	4.17718e+06	5.33463e+06	5.9687e+06	0.835897	0.948281	0.248771	0.045692	0.248771	-0.154203	856
SA_APIP_IP_MeanInactMove_cm	SA_APIP_IP_MeanInactMove_cm	226	49.3524	70.949	37.7421	53.7865	40.0254	74.1481	59.1139	33.1675	60.9202	35.9157	51.4989	61.7371	63.1305	94.3001	95.2478	57.5583	68.794	75.3249	0.992618	0.827318	0.014885	0.008996	0.014885	-0.523661	859
SA_NumActStates_Eat_Drink	SA_NumActStates_Eat_Drink	227	12.325	11.2353	13.9333	10.9333	11.8667	11.9333	12.7333	14.2667	7.93333	15	13.3333	12.6	10.9333	10.7333	9.93333	12.6154	11.3333	8.4	0.097436	0.23581	0.283754	0.049914	0.283754	0.133555	870
SA_NumActStates_Eat_NoDrink	SA_NumActStates_Eat_NoDrink	228	6.11667	2.36346	3.73333	4.2	7.86667	5.73333	8.06667	10.4	4.46667	4.46667	4.66667	1.6	2.46667	2.4	1.8	1.30769	1.33333	3.33333	0.000932	0.030463	0.001336	0.006882	0.001336	1.37184	873
SA_NumActStates_NoEat_Drink	SA_NumActStates_NoEat_Drink	229	1.025	1.55577	0.666667	1.06667	1	0.6	2	1.33333	0.133333	1.4	1.2	1.2	0.866667	1.66667	1.73333	3.84615	1.26667	0.666667	0.860684	0.959737	0.211086	0.04122	0.211086	-0.602004	887
SA_NumActStates_NoEat_NoDrink	SA_NumActStates_NoEat_NoDrink	230	1.35	2.24615	2.13333	1.93333	1	1.26667	2	0.133333	0.933333	1.4	2.13333	3.2	2.26667	3.73333	1.93333	1.76923	2	0.933333	0.975058	0.912812	0.036441	0.013318	0.036441	-0.734497	884
SA_NumActStates_NoEat_NoDrink_SmallMove	SA_NumActStates_NoEat_NoDrink_SmallMove	231	0.05	0.016667	0	0	0	0	0.2	0	0.066667	0.133333	0	0.066667	0	0	0	0	0.066667	0	0.286869	0.510768	0.278219	0.0491	0.278219	1.58496	382
SA_NumActStates_LargeEat_LargeDrink	SA_NumActStates_LargeEat_LargeDrink	232	11.45	10.5686	13.3333	10.5333	10.6	11.1333	11.3333	12.8667	7.86667	13.9333	12.7333	12.4	10.2667	10.1333	9.4	11.6154	10.0667	7.93333	0.117249	0.273627	0.338068	0.057057	0.338068	0.115565	298
SA_NumActStates_LargeEat_SmallDrink	SA_NumActStates_LargeEat_SmallDrink	233	4.69167	1.41731	2.46667	2.13333	5.66667	4.4	6.73333	8.73333	3.33333	4.06667	3.66667	0.466667	1.66667	1.4	1.33333	0.538462	0.333333	1.93333	0.000544	0.050772	0.00231	0.006943	0.00231	1.72695	704
SA_NumActStates_SmallEat_LargeDrink	SA_NumActStates_SmallEat_LargeDrink	234	1.65833	2.02564	1.06667	1.33333	2	1.13333	2.73333	2.6	0.2	2.2	1.66667	1.4	1.33333	2.06667	1.93333	4.53846	2.2	1.06667	0.639549	0.856368	0.468149	0.072248	0.468149	-0.288645	682
SA_NumActStates_SmallEat_SmallDrink	SA_NumActStates_SmallEat_SmallDrink	235	3.01667	3.3891	3.6	4.13333	3.46667	2.86667	4	1.93333	2.06667	2.06667	3.26667	4.33333	3.26667	4.93333	2.73333	2.84615	3.33333	2.4	0.713131	0.894413	0.410033	0.066207	0.410033	-0.167948	693
SA_NumActStates_SmallEat_SmallDrink_SmallMove	SA_NumActStates_SmallEat_SmallDrink_SmallMove	236	0.133333	0.016667	0	0	0	0	0.266667	0.6	0.066667	0.133333	0	0.066667	0	0	0	0	0.066667	0	0.139316	0.296531	0.143748	0.030673	0.143748	3	197
SA_PerActStates_Eat_Drink	SA_PerActStates_Eat_Drink	237	59.5347	64.6854	68.0782	60.2941	54.6012	61.0921	51.3441	54.5918	58.9109	67.3653	62.5	67.7419	66.129	57.9137	64.5022	64.5669	71.1297	63	0.958508	0.932036	0.06165	0.017644	0.06165	-0.11971	165
SA_PerActStates_Eat_NoDrink	SA_PerActStates_Eat_NoDrink	238	29.0627	13.7619	18.241	23.1618	36.1963	29.3515	32.5269	39.7959	33.1683	20.0599	21.875	8.60215	14.9194	12.9496	11.6883	6.69291	8.3682	25	0.001476	0.031119	0.000837	0.008235	0.000837	1.07848	2
SA_PerActStates_NoEat_Drink	SA_PerActStates_NoEat_Drink	239	4.65708	8.7752	3.25733	5.88235	4.60123	3.07167	8.06452	5.10204	0.990099	6.28742	5.625	6.45161	5.24193	8.99281	11.2554	19.685	7.94979	5	0.985936	0.871788	0.047787	0.015619	0.047787	-0.914005	877
SA_PerActStates_NoEat_NoDrink	SA_PerActStates_NoEat_NoDrink	240	6.74549	12.7774	10.4235	10.6618	4.60123	6.48464	8.06452	0.510204	6.93069	6.28742	10	17.2043	13.7097	20.1439	12.5541	9.05512	12.5523	7	0.997669	0.789247	0.006966	0.007109	0.006966	-0.921602	880
SA_PerActStates_NoEat_NoDrink_SmallMove	SA_PerActStates_NoEat_NoDrink_SmallMove	241	0.237538	0.097104	0	0	0	0	0.806452	0	0.49505	0.598802	0	0.358423	0	0	0	0	0.41841	0	0.252681	0.459922	0.318155	0.054895	0.318155	1.29055	747
SA_PerActStates_LargeEat_LargeDrink	SA_PerActStates_LargeEat_LargeDrink	242	55.6161	60.7869	65.1466	58.0882	48.773	56.9966	45.6989	49.2347	58.4158	62.5748	59.6875	66.6667	62.0968	54.6763	61.039	59.4488	63.1799	59.5	0.958508	0.930652	0.081548	0.021105	0.081548	-0.128257	758
SA_PerActStates_LargeEat_SmallDrink	SA_PerActStates_LargeEat_SmallDrink	243	22.0001	8.16713	12.0521	11.7647	26.0736	22.5256	27.1505	33.4184	24.7525	18.2635	17.1875	2.50896	10.0806	7.55396	8.65801	2.75591	2.09205	14.5	0.000932	0.029013	0.000987	0.007624	0.000987	1.42961	23
SA_PerActStates_SmallEat_LargeDrink	SA_PerActStates_SmallEat_LargeDrink	244	7.48813	11.5181	5.21173	7.35294	9.20245	5.80205	11.0215	9.94898	1.48515	9.88024	7.8125	7.52688	8.06452	11.1511	12.5541	23.2283	13.8075	8	0.958508	0.929271	0.087165	0.021728	0.087165	-0.621228	89
SA_PerActStates_SmallEat_SmallDrink	SA_PerActStates_SmallEat_SmallDrink	245	14.8957	19.5279	17.5896	22.7941	15.9509	14.6758	16.129	7.39796	15.3465	9.28144	15.3125	23.2975	19.7581	26.6187	17.7489	14.5669	20.9205	18	0.967521	0.922946	0.055167	0.017052	0.055167	-0.390643	167
SA_PerActStates_SmallEat_SmallDrink_SmallMove	SA_PerActStates_SmallEat_SmallDrink_SmallMove	246	0.55813	0.097104	0	0	0	0	1.07527	2.29592	0.49505	0.598802	0	0.358423	0	0	0	0	0.41841	0	0.117249	0.272653	0.136401	0.029454	0.136401	2.523	199
SA_AP_NumActStates_Eat_Drink	SA_AP_NumActStates_Eat_Drink	247	10.1667	8.97308	11.8	8.93333	9.8	9.73333	11.3333	10.8	6.66667	12.2667	11.3333	9.46667	9.26667	8.8	8.33333	9.38462	8.33333	6.86667	0.041492	0.127289	0.149438	0.03115	0.149438	0.180172	200
SA_AP_NumActStates_Eat_NoDrink	SA_AP_NumActStates_Eat_NoDrink	248	3.34167	1.13654	1.93333	2.4	5.06667	3.93333	4.26667	4.4	1.53333	3.2	2.53333	0.666667	0.933333	1.26667	0.8	0.692308	0.733333	1.46667	0.000544	0.044426	0.000644	0.013925	0.000644	1.55592	168
SA_AP_NumActStates_NoEat_Drink	SA_AP_NumActStates_NoEat_Drink	249	0.758333	1.25897	0.533333	0.866667	0.933333	0.6	1.06667	0.8	0.066667	1.2	1.13333	1	0.733333	1.6	1.46667	2.53846	1	0.6	0.958508	0.927894	0.066522	0.01879	0.066522	-0.731345	152
SA_AP_NumActStates_NoEat_NoDrink	SA_AP_NumActStates_NoEat_NoDrink	250	0.791667	1.02436	1.06667	1.33333	0.4	0.666667	1.13333	0	0.466667	1.26667	0.4	1.6	0.933333	2.53333	0.933333	0.461538	0.933333	0.4	0.560761	0.79831	0.463711	0.072077	0.463711	-0.371756	733
SA_AP_NumActStates_NoEat_NoDrink_SmallMove	SA_AP_NumActStates_NoEat_NoDrink_SmallMove	251	0.016667	0	0	0	0	0	0.066667	0	0	0.066667	0	0	0	0	0	0	0	0	0.220901	0.418394	0.148904	0.031158	0.148904	Inf	748
SA_AP_NumActStates_LargeEat_LargeDrink	SA_AP_NumActStates_LargeEat_LargeDrink	252	9.61667	8.59744	11.3333	8.8	9.33333	9.2	10.0667	10.0667	6.66667	11.4667	10.8667	9.33333	8.86667	8.46667	8.2	8.84615	7.66667	6.53333	0.052448	0.150313	0.168052	0.034498	0.168052	0.16163	759
SA_AP_NumActStates_LargeEat_SmallDrink	SA_AP_NumActStates_LargeEat_SmallDrink	253	2.425	0.678846	1	0.866667	3.46667	3.2	3.66667	3.26667	1.13333	2.8	2.2	0.133333	0.666667	0.6	0.666667	0.230769	0	0.933333	0.000932	0.027694	0.003201	0.006295	0.003201	1.83683	850
SA_AP_NumActStates_SmallEat_LargeDrink	SA_AP_NumActStates_SmallEat_LargeDrink	254	1.225	1.575	0.866667	0.866667	1.4	1.06667	2.06667	1.53333	0.066667	1.93333	1.53333	1.13333	1.06667	1.86667	1.46667	3	1.6	0.933333	0.835897	0.946637	0.301267	0.052568	0.301267	-0.36257	594
SA_AP_NumActStates_SmallEat_SmallDrink	SA_AP_NumActStates_SmallEat_SmallDrink	255	1.79167	1.54167	2.13333	3	2	1.46667	2	1.13333	0.866667	1.73333	0.8	2.13333	1.26667	3.26667	1.2	1	1.73333	0.933333	0.220901	0.417185	0.514637	0.075135	0.514637	0.216811	510
SA_AP_NumActStates_SmallEat_SmallDrink_SmallMove	SA_AP_NumActStates_SmallEat_SmallDrink_SmallMove	256	0.041667	0	0	0	0	0	0.066667	0.2	0	0.066667	0	0	0	0	0	0	0	0	0.117249	0.271686	0.117787	0.026826	0.117787	Inf	777
SA_AP_PerActStates_Eat_Drink	SA_AP_PerActStates_Eat_Drink	257	68.0683	72.6685	76.9565	66.0099	60.4938	65.1786	63.6704	67.5	76.3359	68.4015	73.5931	74.3456	78.0899	61.9718	72.2543	71.7647	75.7576	73.5714	0.919736	0.966227	0.105583	0.024724	0.105583	-0.094348	775
SA_AP_PerActStates_Eat_NoDrink	SA_AP_PerActStates_Eat_NoDrink	258	21.8536	9.13533	12.6087	17.734	31.2757	26.3393	23.97	27.5	17.5573	17.8439	16.4502	5.2356	7.86517	8.92019	6.93642	5.29412	6.66667	15.7143	0.000311	0.050772	0.000386	0.02086	0.000386	1.25834	828
SA_AP_PerActStates_NoEat_Drink	SA_AP_PerActStates_NoEat_Drink	259	4.76359	10.0385	3.47826	6.40394	5.76132	4.01786	5.99251	5	0.763359	6.69145	7.35931	7.8534	6.17978	11.2676	12.7168	19.4118	9.09091	6.42857	0.999689	0.758697	0.008186	0.007837	0.008186	-1.07543	839
SA_AP_PerActStates_NoEat_NoDrink	SA_AP_PerActStates_NoEat_NoDrink	260	5.31449	8.15761	6.95652	9.85222	2.46914	4.46429	6.36704	0	5.34351	7.0632	2.5974	12.5654	7.86517	17.8404	8.09249	3.52941	8.48485	4.28571	0.882751	0.962981	0.195749	0.038573	0.195749	-0.618215	56
SA_AP_PerActStates_NoEat_NoDrink_SmallMove	SA_AP_PerActStates_NoEat_NoDrink_SmallMove	261	0.093285	0	0	0	0	0	0.374532	0	0	0.371747	0	0	0	0	0	0	0	0	0.220901	0.415983	0.148907	0.031099	0.148907	Inf	122
SA_AP_PerActStates_LargeEat_LargeDrink	SA_AP_PerActStates_LargeEat_LargeDrink	262	64.7382	69.5809	73.913	65.0246	57.6132	61.6071	56.5543	62.9167	76.3359	63.9405	70.5628	73.2984	74.7191	59.6244	71.0983	67.6471	69.697	70	0.919736	0.964676	0.126269	0.027992	0.126269	-0.104074	112
SA_AP_PerActStates_LargeEat_SmallDrink	SA_AP_PerActStates_LargeEat_SmallDrink	263	15.67	5.34015	6.52174	6.40394	21.3992	21.4286	20.5993	20.4167	12.9771	15.6134	14.2857	1.04712	5.61798	4.22535	5.78035	1.76471	0	10	0.001476	0.030146	0.002712	0.007156	0.002712	1.55305	46
SA_AP_PerActStates_SmallEat_LargeDrink	SA_AP_PerActStates_SmallEat_LargeDrink	264	7.57235	12.6494	5.65217	6.40394	8.64198	7.14286	11.6105	9.58333	0.763359	10.7807	9.95671	8.90052	8.98876	13.1455	12.7168	22.9412	14.5455	10	0.992618	0.826264	0.026519	0.010908	0.026519	-0.740252	132
SA_AP_PerActStates_SmallEat_SmallDrink	SA_AP_PerActStates_SmallEat_SmallDrink	265	12.0195	12.4296	13.913	22.1675	12.3457	9.82143	11.236	7.08333	9.92366	9.66543	5.1948	16.7539	10.6742	23.0047	10.4046	7.64706	15.7576	10	0.639549	0.854617	0.876559	0.111695	0.876559	-0.048403	66
SA_AP_PerActStates_SmallEat_SmallDrink_SmallMove	SA_AP_PerActStates_SmallEat_SmallDrink_SmallMove	266	0.249535	0	0	0	0	0	0.374532	1.25	0	0.371747	0	0	0	0	0	0	0	0	0.117249	0.270726	0.129391	0.028222	0.129391	Inf	703
SA_IP_NumActStates_Eat_Drink	SA_IP_NumActStates_Eat_Drink	267	2.15833	2.26218	2.13333	2	2.06667	2.2	1.4	3.46667	1.26667	2.73333	2	3.13333	1.66667	1.93333	1.6	3.23077	3	1.53333	0.479565	0.73046	0.776221	0.102034	0.776221	-0.067796	681
SA_IP_NumActStates_Eat_NoDrink	SA_IP_NumActStates_Eat_NoDrink	268	2.775	1.22692	1.8	1.8	2.8	1.8	3.8	6	2.93333	1.26667	2.13333	0.933333	1.53333	1.13333	1	0.615385	0.6	1.86667	0.007382	0.044661	0.018342	0.009872	0.018342	1.17744	692
SA_IP_NumActStates_NoEat_Drink	SA_IP_NumActStates_NoEat_Drink	269	0.266667	0.296795	0.133333	0.2	0.066667	0	0.933333	0.533333	0.066667	0.2	0.066667	0.2	0.133333	0.066667	0.266667	1.30769	0.266667	0.066667	0.600777	0.829963	0.872809	0.111611	0.872809	-0.154429	740
SA_IP_NumActStates_NoEat_NoDrink	SA_IP_NumActStates_NoEat_NoDrink	270	0.558333	1.22179	1.06667	0.6	0.6	0.6	0.866667	0.133333	0.466667	0.133333	1.73333	1.6	1.33333	1.2	1	1.30769	1.06667	0.533333	0.997669	0.788292	0.001923	0.006501	0.001923	-1.1298	718
SA_IP_NumActStates_NoEat_NoDrink_SmallMove	SA_IP_NumActStates_NoEat_NoDrink_SmallMove	271	0.033333	0.016667	0	0	0	0	0.133333	0	0.066667	0.066667	0	0.066667	0	0	0	0	0.066667	0	0.322688	0.563791	0.438353	0.069331	0.438353	1	729
SA_IP_NumActStates_LargeEat_LargeDrink	SA_IP_NumActStates_LargeEat_LargeDrink	272	1.83333	1.97115	2	1.73333	1.26667	1.93333	1.26667	2.8	1.2	2.46667	1.86667	3.06667	1.4	1.66667	1.2	2.76923	2.4	1.4	0.600777	0.828212	0.674945	0.092544	0.674945	-0.104571	804
SA_IP_NumActStates_LargeEat_SmallDrink	SA_IP_NumActStates_LargeEat_SmallDrink	273	2.26667	0.738462	1.46667	1.26667	2.2	1.2	3.06667	5.46667	2.2	1.26667	1.46667	0.333333	1	0.8	0.666667	0.307692	0.333333	1	0.000544	0.03949	0.012306	0.008534	0.012306	1.61798	793
SA_IP_NumActStates_SmallEat_LargeDrink	SA_IP_NumActStates_SmallEat_LargeDrink	274	0.433333	0.450641	0.2	0.466667	0.6	0.066667	0.666667	1.06667	0.133333	0.266667	0.133333	0.266667	0.266667	0.2	0.466667	1.53846	0.6	0.133333	0.439239	0.685003	0.933566	0.115161	0.933566	-0.056501	815
SA_IP_NumActStates_SmallEat_SmallDrink	SA_IP_NumActStates_SmallEat_SmallDrink	275	1.225	1.84744	1.46667	1.13333	1.46667	1.4	2	0.8	1.2	0.333333	2.46667	2.2	2	1.66667	1.53333	1.84615	1.6	1.46667	0.997669	0.78734	0.011923	0.00843	0.011923	-0.592743	818
SA_IP_NumActStates_SmallEat_SmallDrink_SmallMove	SA_IP_NumActStates_SmallEat_SmallDrink_SmallMove	276	0.091667	0.016667	0	0	0	0	0.2	0.4	0.066667	0.066667	0	0.066667	0	0	0	0	0.066667	0	0.164103	0.335098	0.167109	0.03437	0.167109	2.45943	721
SA_IP_PerActStates_Eat_Drink	SA_IP_PerActStates_Eat_Drink	277	39.2825	44.7463	41.5584	43.4783	37.3494	47.8261	20	34.2105	26.7606	63.0769	33.7079	53.4091	35.7143	44.6154	41.3793	50	60.8108	38.3333	0.808858	0.940464	0.356242	0.059109	0.356242	-0.187879	730
SA_IP_PerActStates_Eat_NoDrink	SA_IP_PerActStates_Eat_NoDrink	278	46.0784	25.6362	35.0649	39.1304	50.6024	39.1304	54.2857	59.2105	61.9718	29.2308	35.9551	15.9091	32.8571	26.1538	25.8621	9.52381	12.1622	46.6667	0.003497	0.033599	0.005284	0.006971	0.005284	0.845906	291
SA_IP_PerActStates_NoEat_Drink	SA_IP_PerActStates_NoEat_Drink	279	4.0963	5.39188	2.5974	4.34783	1.20482	0	13.3333	5.26316	1.40845	4.61538	1.1236	3.40909	2.85714	1.53846	6.89655	20.2381	5.40541	1.66667	0.713131	0.8927	0.636013	0.088553	0.636013	-0.396467	419
SA_IP_PerActStates_NoEat_NoDrink	SA_IP_PerActStates_NoEat_NoDrink	280	10.5428	24.2256	20.7792	13.0435	10.8434	13.0435	12.381	1.31579	9.85915	3.07692	29.2135	27.2727	28.5714	27.6923	25.8621	20.2381	21.6216	13.3333	0.999845	0.75618	0.00033	0.035734	0.00033	-1.20028	373
SA_IP_PerActStates_NoEat_NoDrink_SmallMove	SA_IP_PerActStates_NoEat_NoDrink_SmallMove	281	0.606459	0.310964	0	0	0	0	1.90476	0	1.40845	1.53846	0	1.13636	0	0	0	0	1.35135	0	0.252681	0.458644	0.42929	0.068398	0.42929	0.963661	215
SA_IP_PerActStates_LargeEat_LargeDrink	SA_IP_PerActStates_LargeEat_LargeDrink	282	33.6956	38.7169	38.961	37.6812	22.8916	42.029	18.0952	27.6316	25.3521	56.9231	31.4607	52.2727	30	38.4615	31.0345	42.8571	48.6486	35	0.860684	0.958102	0.366361	0.059961	0.366361	-0.200404	883
SA_IP_PerActStates_LargeEat_SmallDrink	SA_IP_PerActStates_LargeEat_SmallDrink	283	36.9275	15.5064	28.5714	27.5362	39.759	26.087	43.8095	53.9474	46.4789	29.2308	24.7191	5.68182	21.4286	18.4615	17.2414	4.7619	6.75676	25	7.8e-05	0.050772	0.000521	0.018772	0.000521	1.25183	869
SA_IP_PerActStates_SmallEat_LargeDrink	SA_IP_PerActStates_SmallEat_LargeDrink	284	6.91932	8.56204	3.8961	10.1449	10.8434	1.44928	9.52381	10.5263	2.8169	6.15385	2.24719	4.54545	5.71429	4.61538	12.069	23.8095	12.1622	3.33333	0.677312	0.866112	0.57841	0.082226	0.57841	-0.307324	876
SA_IP_PerActStates_SmallEat_SmallDrink	SA_IP_PerActStates_SmallEat_SmallDrink	285	22.4576	37.2147	28.5714	24.6377	26.506	30.4348	28.5714	7.89474	25.3521	7.69231	41.573	37.5	42.8571	38.4615	39.6552	28.5714	32.4324	36.6667	0.999845	0.755306	0.001263	0.006833	0.001263	-0.72867	401
SA_IP_PerActStates_SmallEat_SmallDrink_SmallMove	SA_IP_PerActStates_SmallEat_SmallDrink_SmallMove	286	1.21893	0.310964	0	0	0	0	2.85714	3.94737	1.40845	1.53846	0	1.13636	0	0	0	0	1.35135	0	0.117249	0.269773	0.137016	0.029528	0.137016	1.97079	311
BA_PE_APIP_Large_MeanTotalBoutDur_ms	BA_PE_APIP_Large_MeanTotalBoutDur_ms	287	4.15636e+06	5.56224e+06	3.56982e+06	3.6232e+06	4.33869e+06	6.21805e+06	6271241	2.78168e+06	3.31503e+06	3133182	5.76402e+06	3.76677e+06	5.20764e+06	3.77069e+06	5.17784e+06	6.45505e+06	6.06595e+06	8.28997e+06	0.975058	0.911506	0.067861	0.018921	0.067861	-0.420345	581
BA_PE_APIP_Large_MeanTotalBoutIntake_mg	BA_PE_APIP_Large_MeanTotalBoutIntake_mg	288	3153.74	3479.89	2910.97	3185.81	3682.43	3538.5	3311.06	2846.62	3002.33	2752.17	3437.13	3308.46	3758.51	3412.15	3407.53	3338.99	3490.83	3685.55	0.981041	0.892831	0.026674	0.01093	0.026674	-0.141982	501
BA_PE_APIP_Large_BoutNumber	BA_PE_APIP_Large_BoutNumber	289	44.1167	32.2154	33.4	23.3333	68.8	56.6	45.8667	36.5333	43.4	45	40.7333	36.4	27.5333	34.1333	29.7333	30.9231	29.6667	28.6	0.018959	0.082043	0.038299	0.01354	0.038299	0.453574	485
BA_PE_APIP_Large_BoutProbability	BA_PE_APIP_Large_BoutProbability	290	0.425667	0.524315	0.381279	0.348259	0.554541	0.489055	0.502557	0.2751	0.50426	0.350285	0.582459	0.553191	0.591691	0.591908	0.495556	0.580087	0.259324	0.540302	0.981041	0.891589	0.083358	0.021219	0.083358	-0.300708	567
BA_PE_APIP_Large_BoutPerCumIntake	BA_PE_APIP_Large_BoutPerCumIntake	291	95.1344	97.7003	93.5002	97.7242	97.7637	97.5689	97.1934	89.1427	96.8493	91.333	97.4612	97.6909	98.5624	98.4273	97.7302	97.9839	95.7267	98.02	0.989666	0.852027	0.056299	0.017157	0.056299	-0.038396	607
BA_PE_APIP_Large_BoutMeanDur_ms	BA_PE_APIP_Large_BoutMeanDur_ms	292	99245.1	177727	106881	155280	63062.4	109860	136728	76140.8	76383.1	69626.3	141506	103483	189139	110469	174143	208745	204470	289859	0.997669	0.786391	0.00643	0.006754	0.00643	-0.840594	491
BA_PE_APIP_Large_BoutMeanSize_mg	BA_PE_APIP_Large_BoutMeanSize_mg	293	77.5219	110.108	87.1548	136.535	53.5237	62.5177	72.1887	77.9185	69.1781	61.1593	84.3813	90.8919	136.508	99.9653	114.603	107.977	117.669	128.865	0.994794	0.816632	0.011345	0.008182	0.011345	-0.506237	323
BA_PE_APIP_Large_BoutMeanIntensity_mgs	BA_PE_APIP_Large_BoutMeanIntensity_mgs	294	0.847434	0.687806	0.876126	0.929566	0.911306	0.607293	0.540114	1.03883	0.966645	0.909598	0.626341	0.946629	0.749916	0.920269	0.671674	0.538258	0.589938	0.459424	0.080264	0.205678	0.090439	0.022186	0.090439	0.301099	820
BA_PE_APIP_Large_BoutRatioIntensity_mgs	BA_PE_APIP_Large_BoutRatioIntensity_mgs	295	0.80599	0.662088	0.81544	0.879281	0.848743	0.569069	0.527975	1.02335	0.905672	0.878394	0.596308	0.87833	0.721731	0.904913	0.658098	0.517268	0.57548	0.44458	0.080264	0.204875	0.107681	0.025052	0.107681	0.283738	732
BA_PE_APIP_Large_BoutSlopeIntensity_mgs	BA_PE_APIP_Large_BoutSlopeIntensity_mgs	296	0.678008	0.591823	0.549824	0.761059	0.753922	0.473459	0.480395	0.890282	0.780017	0.735105	0.526275	0.75149	0.636098	0.826699	0.617093	0.486137	0.492156	0.398634	0.191142	0.376205	0.269528	0.048037	0.269528	0.196137	143
BA_PE_APIP_Large_AP_MeanTotalBoutDur_ms	BA_PE_APIP_Large_AP_MeanTotalBoutDur_ms	297	3.60873e+06	4.93388e+06	3.09439e+06	3.0412e+06	4.07818e+06	5803047	5.45907e+06	1.94794e+06	2.8149e+06	2.63112e+06	5.08127e+06	3.28758e+06	4.65366e+06	3.36408e+06	4.80605e+06	5.51337e+06	5.36542e+06	7.39964e+06	0.967521	0.921601	0.068678	0.018905	0.068678	-0.451232	144
BA_PE_APIP_Large_AP_MeanTotalBoutIntake_mg	BA_PE_APIP_Large_AP_MeanTotalBoutIntake_mg	298	2643.19	3067.85	2444.32	2602.69	3427.07	3260.22	2694.03	1937.96	2509.02	2270.23	3028.93	2878.44	3304.05	3025.31	3155.62	2857.51	3047.64	3245.3	0.967521	0.920259	0.03579	0.013125	0.03579	-0.214947	145
BA_PE_APIP_Large_AP_BoutNumber	BA_PE_APIP_Large_AP_BoutNumber	299	39.2	28.9628	29.3333	19.8667	64.5333	51.9333	41.3333	28.2667	39.1333	39.2	36	32.5333	24.8667	31.3333	27.4667	27.7692	26.0667	25.6667	0.032479	0.104034	0.068501	0.018905	0.068501	0.436652	783
BA_PE_APIP_Large_AP_BoutProbability	BA_PE_APIP_Large_AP_BoutProbability	300	0.413983	0.526489	0.364842	0.329646	0.559861	0.491483	0.493238	0.239683	0.49788	0.335234	0.576307	0.553288	0.594896	0.5875	0.492823	0.59571	0.25016	0.561224	0.989666	0.850906	0.068386	0.019018	0.068386	-0.346829	816
BA_PE_APIP_Large_AP_BoutPerCumIntake	BA_PE_APIP_Large_AP_BoutPerCumIntake	301	94.3578	97.886	92.6163	97.4327	97.8544	97.6771	96.8956	85.5336	96.6491	90.2038	97.6626	97.827	98.6634	98.3717	97.7561	98.5804	95.9071	98.3199	0.994794	0.815608	0.047706	0.015687	0.047706	-0.052961	708
BA_PE_APIP_Large_AP_BoutMeanDur_ms	BA_PE_APIP_Large_AP_BoutMeanDur_ms	302	96693.1	175545	105491	153081	63195	111740	132074	68912.9	71930.9	67120.4	141146	101053	187144	107364	174978	198542	205834	288298	0.996503	0.803897	0.006295	0.006949	0.006295	-0.860356	710
BA_PE_APIP_Large_AP_BoutMeanSize_mg	BA_PE_APIP_Large_AP_BoutMeanSize_mg	303	73.2483	107.898	83.329	131.008	53.1054	62.7771	65.1781	68.5599	64.1146	57.914	84.1369	88.4766	132.87	96.5525	114.889	102.902	116.917	126.44	0.997669	0.785443	0.006377	0.006969	0.006377	-0.558803	719
BA_PE_APIP_Large_AP_BoutMeanIntensity_mgs	BA_PE_APIP_Large_AP_BoutMeanIntensity_mgs	304	0.833176	0.684363	0.860819	0.912594	0.902466	0.598861	0.514735	1.02201	0.959073	0.894851	0.624384	0.949306	0.740956	0.916361	0.669364	0.540504	0.579738	0.454288	0.117249	0.268827	0.115019	0.026475	0.115019	0.283859	862
BA_PE_APIP_Large_AP_BoutRatioIntensity_mgs	BA_PE_APIP_Large_AP_BoutRatioIntensity_mgs	305	0.786304	0.657801	0.789919	0.855811	0.840341	0.561812	0.493496	0.994877	0.891337	0.862838	0.596096	0.875549	0.709989	0.899299	0.656593	0.518288	0.568015	0.438576	0.164103	0.334054	0.146917	0.031165	0.146917	0.257436	183
BA_PE_APIP_Large_AP_BoutSlopeIntensity_mgs	BA_PE_APIP_Large_AP_BoutSlopeIntensity_mgs	306	0.624447	0.587392	0.49797	0.727685	0.756261	0.47179	0.421786	0.682607	0.735039	0.702442	0.529858	0.742922	0.625033	0.796666	0.621003	0.488935	0.501809	0.392909	0.399223	0.653806	0.594261	0.083819	0.594261	0.088257	101
BA_PE_APIP_Large_IP_MeanTotalBoutDur_ms	BA_PE_APIP_Large_IP_MeanTotalBoutDur_ms	307	547631	628356	475427	581995	260511	415008	812175	833739	500131	502061	682753	479188	553979	406614	371784	941677	700531	890325	0.747319	0.91964	0.441021	0.069247	0.441021	-0.198379	35
BA_PE_APIP_Large_IP_MeanTotalBoutIntake_mg	BA_PE_APIP_Large_IP_MeanTotalBoutIntake_mg	308	510.544	412.045	466.655	583.115	255.369	278.276	617.029	908.665	493.308	481.937	408.205	430.026	454.467	386.835	251.906	481.476	443.196	440.249	0.041492	0.126694	0.221744	0.04216	0.221744	0.309235	146
BA_PE_APIP_Large_IP_BoutNumber	BA_PE_APIP_Large_IP_BoutNumber	309	4.91667	3.25256	4.06667	3.46667	4.26667	4.66667	4.53333	8.26667	4.26667	5.8	4.73333	3.86667	2.66667	2.8	2.26667	3.15385	3.6	2.93333	0.005206	0.035808	0.015029	0.008983	0.015029	0.596103	595
BA_PE_APIP_Large_IP_BoutProbability	BA_PE_APIP_Large_IP_BoutProbability	310	0.533201	0.519838	0.564815	0.514851	0.484848	0.463576	0.607143	0.556054	0.571429	0.50289	0.633929	0.552381	0.56338	0.646154	0.53125	0.471264	0.352941	0.407407	0.439239	0.683373	0.746265	0.098938	0.746265	0.036616	511
BA_PE_APIP_Large_IP_BoutPerCumIntake	BA_PE_APIP_Large_IP_BoutPerCumIntake	311	97.72	96.4804	98.4201	99.0467	96.5636	96.3194	98.5155	97.9581	97.8802	97.0565	95.9925	96.7893	97.8345	98.8643	97.407	94.5869	94.5047	95.8641	0.041492	0.126105	0.075128	0.01992	0.075128	0.018418	779
BA_PE_APIP_Large_IP_BoutMeanDur_ms	BA_PE_APIP_Large_IP_BoutMeanDur_ms	312	114821	197731	116908	167883	61057.2	88930.2	179156	100855	117218	86562.2	144243	123928	207742	145219	164022	298581	194592	303520	0.996503	0.802905	0.011223	0.008316	0.011223	-0.784147	616
BA_PE_APIP_Large_IP_BoutStdDur_ms	BA_PE_APIP_Large_IP_BoutStdDur_ms	313	47606.8	79497.1	45430.7	70305.7	26971.1	43107.7	74786	29308.7	55686.4	35257.8	69688.8	46494.5	85701.9	52330.3	71584.6	79468.7	78819.5	151888	0.994794	0.814585	0.028287	0.011376	0.028287	-0.739735	794
BA_PE_APIP_Large_IP_BoutStdSize_mg	BA_PE_APIP_Large_IP_BoutStdSize_mg	314	43.9906	50.9256	49.6855	73.662	21.611	31.5813	59.9346	34.831	49.2167	31.4025	39.9659	41.7284	68.7803	52.1065	42.0821	43.4391	43.6133	75.6895	0.835897	0.944999	0.389668	0.063202	0.389668	-0.211197	257
BA_PE_APIP_Large_IP_BoutStdIntensity_mgs	BA_PE_APIP_Large_IP_BoutStdIntensity_mgs	315	0.208857	0.150197	0.205539	0.211214	0.219375	0.201853	0.207119	0.178071	0.206279	0.241409	0.19284	0.195901	0.152763	0.191567	0.122219	0.093697	0.155219	0.097365	0.000544	0.035541	0.002722	0.00701	0.002722	0.475666	262
BA_PE_APIP_Large_IP_BoutSlopeIntensity_mgs	BA_PE_APIP_Large_IP_BoutSlopeIntensity_mgs	316	0.799518	0.590712	0.951191	0.941736	0.689404	0.616885	0.626989	1.0256	0.808896	0.735442	0.495223	0.80124	0.737626	0.860073	0.54877	0.41111	0.43188	0.439776	0.024942	0.09105	0.027497	0.0111	0.027497	0.436675	237
BA_PE_APIP_AP_BoutThresh_mg	BA_PE_APIP_AP_BoutThresh_mg	317	17.2565	16.7861	31.3259	15.1374	7.09646	6.54557	10.6295	31.3259	13.5456	22.446	14.3919	11.5241	15.9216	19.486	21.5571	12.8785	22.446	16.0832	0.639549	0.852873	0.9036	0.113011	0.9036	0.03988	242
BA_PE_APIP_IP_BoutThresh_mg	BA_PE_APIP_IP_BoutThresh_mg	318	21.9966	36.8371	21.5571	24.9712	12.749	13.1413	21.9971	31.3259	26.3832	23.8484	25.8555	32.9486	38.7281	34.6554	29.1874	59.1933	39.1213	35.0073	0.999689	0.757817	0.003376	0.006522	0.003376	-0.743877	322
BA_PE_APIP_Large_TotalDur_ms	BA_PE_APIP_Large_TotalDur_ms	319	381599	485631	592000	278000	367661	358875	398765	327537	305081	424877	506827	525742	552063	517504	452121	510743	446068	373981	0.992618	0.825213	0.02114	0.010164	0.02114	-0.347802	490
BA_PE_APIP_Large_TotalIntake_mg	BA_PE_APIP_Large_TotalIntake_mg	320	3642.88	4139.31	3611.8	3529.03	3790.44	4165.68	3699.37	3512.07	3462.29	3372.4	3872.86	4291.85	3853.33	4528.42	3991.6	4208.56	4350.17	4017.73	0.999456	0.76295	0.001233	0.007411	0.001233	-0.184311	606
BA_PE_APIP_Large_Number	BA_PE_APIP_Large_Number	321	35.3167	31.8032	35.9333	27.9333	43.4667	36.9333	32.2667	35.8667	23.0667	47.0667	27.8	33.8	21.1333	25.4	26.7333	36.6923	57.2667	25.6	0.117249	0.267887	0.483291	0.07292	0.483291	0.151177	566
BA_PE_APIP_Large_Probability	BA_PE_APIP_Large_Probability	322	0.88617	0.897716	0.942308	0.891489	0.870494	0.884984	0.721311	0.927586	0.940217	0.910968	0.926667	0.982558	0.854447	0.850446	0.821721	0.886617	0.884655	0.974619	0.399223	0.652172	0.729487	0.098035	0.729487	-0.018677	484
BA_PE_APIP_Large_PerCumIntake	BA_PE_APIP_Large_PerCumIntake	323	99.2944	99.2543	99.7735	99.5026	98.5382	99.4987	98.3876	99.3982	99.8737	99.383	99.816	99.9654	99.1423	98.8738	98.4769	99.1146	98.8675	99.7781	0.479565	0.728761	0.88411	0.112524	0.88411	0.000583	500
BA_PE_APIP_Large_Dur_ms	BA_PE_APIP_Large_Dur_ms	324	11043.3	16689.1	16474.9	9952.25	8458.45	9716.84	12358.4	9132.06	13226.1	9027.14	18231.2	15554.5	26122.8	20374.2	16912.3	13919.6	7789.31	14608.7	0.989666	0.849787	0.018386	0.009847	0.018386	-0.595736	580
BA_PE_APIP_Large_Size_mg	BA_PE_APIP_Large_Size_mg	325	107.646	140.478	100.514	126.337	87.2033	112.789	114.65	97.9202	150.099	71.6515	139.311	126.978	182.334	178.284	149.312	114.699	75.9634	156.943	0.985936	0.87061	0.046255	0.015637	0.046255	-0.384055	821
BA_PE_APIP_Large_MeanIntensity_mgs	BA_PE_APIP_Large_MeanIntensity_mgs	326	11.0593	9.23232	7.27212	13.1088	12.8167	12.5517	10.2974	11.4175	12.0558	8.95456	8.17911	8.75172	7.52797	8.95036	9.46936	8.95488	10.5758	11.4494	0.041492	0.125521	0.051313	0.016184	0.051313	0.260499	707
BA_PE_APIP_Large_RatioIntensity_mgs	BA_PE_APIP_Large_RatioIntensity_mgs	327	9.9998	8.6374	6.10101	12.6944	10.3096	11.6076	9.27707	10.7227	11.3487	7.93735	7.64138	8.1634	6.97988	8.75051	8.82859	8.24007	9.75226	10.7431	0.080264	0.204077	0.138473	0.029782	0.138473	0.211302	762
BA_PE_APIP_Small_MeanTotalBoutDur_ms	BA_PE_APIP_Small_MeanTotalBoutDur_ms	328	293725	125598	526144	188187	112140	215525	154865	500762	232587	419594	100302	105763	80828.4	63756.9	121268	98790.3	321276	112799	0.003497	0.033112	0.020495	0.009987	0.020495	1.22566	751
BA_PE_APIP_Small_MeanTotalBoutIntake_mg	BA_PE_APIP_Small_MeanTotalBoutIntake_mg	329	156.264	81.9003	202.362	74.1906	84.2327	88.167	95.611	346.709	97.672	261.166	89.5347	78.202	54.8205	54.5192	79.1407	68.704	155.832	74.4488	0.014064	0.072935	0.069777	0.019062	0.069777	0.932042	773
BA_PE_APIP_Small_BoutNumber	BA_PE_APIP_Small_BoutNumber	330	60.0083	32.8564	54.2	43.6667	55.2667	59.1333	45.4	96.2667	42.6667	83.4667	29.2	29.4	19	23.5333	30.2667	22.3846	84.7333	24.3333	0.003497	0.032639	0.019102	0.009702	0.019102	0.868988	805
BA_PE_APIP_Small_BoutProbability	BA_PE_APIP_Small_BoutProbability	331	0.574333	0.475685	0.618721	0.651741	0.445459	0.510945	0.497443	0.7249	0.49574	0.649715	0.417541	0.446809	0.408309	0.408092	0.504444	0.419913	0.740676	0.459698	0.024942	0.090544	0.083358	0.021169	0.083358	0.27188	678
BA_PE_APIP_Small_BoutPerCumIntake	BA_PE_APIP_Small_BoutPerCumIntake	332	4.86557	2.29968	6.49984	2.27578	2.23626	2.43107	2.80659	10.8573	3.15071	8.667	2.53879	2.30911	1.4376	1.57267	2.26981	2.01614	4.27328	1.98002	0.014064	0.072361	0.056299	0.017109	0.056299	1.08118	689
BA_PE_APIP_Small_BoutMeanDur_ms	BA_PE_APIP_Small_BoutMeanDur_ms	333	4847.77	3855.36	9707.45	4309.63	2029.07	3644.72	3411.12	5201.82	5451.25	5027.09	3434.99	3597.39	4254.13	2709.22	4006.64	4413.31	3791.61	4635.58	0.164103	0.333017	0.251499	0.046115	0.251499	0.330457	11
BA_PE_APIP_Small_BoutMeanSize_mg	BA_PE_APIP_Small_BoutMeanSize_mg	334	2.44668	2.68885	3.73361	1.69902	1.52411	1.49099	2.10597	3.60155	2.28919	3.12898	3.06626	2.65993	2.88529	2.31668	2.61478	3.06925	1.83909	3.05954	0.747319	0.917912	0.511861	0.075237	0.511861	-0.136167	77
BA_PE_APIP_Small_BoutMeanIntensity_mgs	BA_PE_APIP_Small_BoutMeanIntensity_mgs	335	1.0486	1.25825	0.95027	1.02047	1.25047	0.715013	1.07278	1.03134	1.19466	1.15381	1.64613	1.37384	1.21522	1.24371	1.04554	1.42764	0.866281	1.24763	0.975058	0.910204	0.060283	0.017438	0.060283	-0.26295	151
BA_PE_APIP_Small_BoutRatioIntensity_mgs	BA_PE_APIP_Small_BoutRatioIntensity_mgs	336	0.536397	0.707316	0.384613	0.394238	0.751137	0.409081	0.617384	0.692364	0.419938	0.622424	0.892655	0.739407	0.678234	0.855111	0.652613	0.695452	0.485042	0.660013	0.985936	0.869435	0.027493	0.01114	0.027493	-0.399052	387
BA_PE_APIP_Small_BoutSlopeIntensity_mgs	BA_PE_APIP_Small_BoutSlopeIntensity_mgs	337	0.247841	0.348988	0.248886	0.128447	0.190274	0.156274	0.302141	0.484763	0.137514	0.334428	0.35408	0.174069	0.323768	0.358614	0.441273	0.466756	0.319381	0.35396	0.975058	0.908906	0.078765	0.020483	0.078765	-0.493763	301
BA_PE_APIP_Small_AP_MeanTotalBoutDur_ms	BA_PE_APIP_Small_AP_MeanTotalBoutDur_ms	338	278381	102272	516510	174328	103435	191396	143289	477434	218672	401985	83088.7	90600.9	58738.7	58982.6	112765	55326.6	275025	83648.7	0.002331	0.034618	0.013771	0.008712	0.013771	1.44465	855
BA_PE_APIP_Small_AP_MeanTotalBoutIntake_mg	BA_PE_APIP_Small_AP_MeanTotalBoutIntake_mg	339	145.468	66.2959	194.871	68.5783	75.1448	77.5335	86.3132	327.769	86.9884	246.55	72.4932	63.9373	44.761	50.0756	72.435	41.1495	130.061	55.4551	0.003497	0.03218	0.046879	0.01575	0.046879	1.13371	149
BA_PE_APIP_Small_AP_BoutNumber	BA_PE_APIP_Small_AP_BoutNumber	340	55.6583	29.6224	51.0667	40.4	50.7333	53.7333	42.4667	89.6667	39.4667	77.7333	26.4667	26.2667	16.9333	22	28.2667	18.8462	78.1333	20.0667	0.003497	0.031733	0.016887	0.009666	0.016887	0.909907	1
BA_PE_APIP_Small_AP_BoutProbability	BA_PE_APIP_Small_AP_BoutProbability	341	0.586017	0.473511	0.635158	0.670354	0.440139	0.508517	0.506762	0.760317	0.50212	0.664766	0.423693	0.446712	0.405104	0.4125	0.507177	0.40429	0.74984	0.438776	0.014064	0.071795	0.068386	0.01897	0.068386	0.307542	320
BA_PE_APIP_Small_AP_BoutPerCumIntake	BA_PE_APIP_Small_AP_BoutPerCumIntake	342	5.64218	2.11398	7.38374	2.56725	2.14564	2.32292	3.10441	14.4664	3.35085	9.79624	2.33742	2.17298	1.33662	1.62827	2.24392	1.4196	4.09292	1.68007	0.007382	0.044251	0.047706	0.015639	0.047706	1.41629	482
BA_PE_APIP_Small_AP_BoutMeanDur_ms	BA_PE_APIP_Small_AP_BoutMeanDur_ms	343	4930.12	3419	10114.4	4315.05	2038.8	3561.96	3374.14	5324.54	5540.69	5171.33	3139.37	3449.27	3468.82	2681.03	3989.32	2935.7	3519.94	4168.54	0.041492	0.124942	0.103841	0.024421	0.103841	0.528048	604
BA_PE_APIP_Small_AP_BoutMeanSize_mg	BA_PE_APIP_Small_AP_BoutMeanSize_mg	344	2.43767	2.40836	3.81601	1.69748	1.48117	1.44293	2.03249	3.65541	2.2041	3.17174	2.73904	2.43416	2.64337	2.27617	2.56256	2.18344	1.6646	2.76354	0.677312	0.86442	0.937425	0.115505	0.937425	0.01745	562
BA_PE_APIP_Small_AP_BoutMeanIntensity_mgs	BA_PE_APIP_Small_AP_BoutMeanIntensity_mgs	345	1.04218	1.25698	0.943766	1.02445	1.25145	0.71093	1.07058	1.02489	1.16865	1.14271	1.65511	1.36748	1.22338	1.24063	1.0385	1.42015	0.864468	1.24611	0.975058	0.907611	0.055325	0.017052	0.055325	-0.270356	150
BA_PE_APIP_Small_AP_BoutRatioIntensity_mgs	BA_PE_APIP_Small_AP_BoutRatioIntensity_mgs	346	0.525286	0.713897	0.377284	0.393386	0.726491	0.405094	0.602373	0.686522	0.397803	0.613332	0.872479	0.705703	0.762035	0.84899	0.642355	0.743756	0.472906	0.662953	0.994794	0.813566	0.015519	0.009075	0.015519	-0.442614	4
BA_PE_APIP_Small_AP_BoutSlopeIntensity_mgs	BA_PE_APIP_Small_AP_BoutSlopeIntensity_mgs	347	0.241214	0.289231	0.248113	0.124053	0.18334	0.145553	0.282404	0.487534	0.127305	0.331409	0.265723	0.142231	0.279403	0.353711	0.413861	0.288885	0.294606	0.27543	0.882751	0.961376	0.372196	0.06064	0.372196	-0.261912	198
BA_PE_APIP_Small_IP_MeanTotalBoutDur_ms	BA_PE_APIP_Small_IP_MeanTotalBoutDur_ms	348	15344.3	23325.9	9633.73	13859.3	8704.87	24128.3	11576.1	23328.1	13914.3	17609.9	17212.9	15162.3	22089.7	4774.33	8502.87	43463.7	46251.1	29150.3	0.808858	0.938794	0.189485	0.037544	0.189485	-0.604227	5
BA_PE_APIP_Small_IP_MeanTotalBoutIntake_mg	BA_PE_APIP_Small_IP_MeanTotalBoutIntake_mg	349	10.7953	15.6043	7.49088	5.61232	9.08789	10.6335	9.29774	18.9406	10.6836	14.6158	17.0415	14.2647	10.0595	4.44363	6.70575	27.5545	25.7713	18.9937	0.860684	0.956473	0.170364	0.034644	0.170364	-0.531546	166
BA_PE_APIP_Small_IP_BoutNumber	BA_PE_APIP_Small_IP_BoutNumber	350	4.35	3.23397	3.13333	3.26667	4.53333	5.4	2.93333	6.6	3.2	5.73333	2.73333	3.13333	2.06667	1.53333	2	3.53846	6.6	4.26667	0.06519	0.17387	0.165771	0.034159	0.165771	0.427707	576
BA_PE_APIP_Small_IP_BoutProbability	BA_PE_APIP_Small_IP_BoutProbability	351	0.466799	0.480162	0.435185	0.485149	0.515152	0.536424	0.392857	0.443946	0.428571	0.49711	0.366071	0.447619	0.43662	0.353846	0.46875	0.528736	0.647059	0.592593	0.600777	0.826468	0.746265	0.098817	0.746265	-0.040718	288
BA_PE_APIP_Small_IP_BoutPerCumIntake	BA_PE_APIP_Small_IP_BoutPerCumIntake	352	2.27997	3.51958	1.57987	0.953296	3.43644	3.68055	1.48449	2.04188	2.11979	2.94346	4.00745	3.21067	2.16555	1.13567	2.59298	5.41313	5.49533	4.13588	0.967521	0.918922	0.075128	0.019969	0.075128	-0.626389	416
BA_PE_APIP_Small_IP_BoutMeanDur_ms	BA_PE_APIP_Small_IP_BoutMeanDur_ms	353	3575.79	6914.15	3074.6	4242.63	1920.19	4468.21	3946.41	3534.56	4348.23	3071.49	6297.39	4839.02	10688.5	3113.7	4251.43	12283.2	7007.75	6832.11	0.997669	0.784498	0.011788	0.00839	0.011788	-0.951289	368
BA_PE_APIP_Small_IP_BoutStdDur_ms	BA_PE_APIP_Small_IP_BoutStdDur_ms	354	5367.59	13079.6	4810.02	7578.46	1702.62	6244.28	4922.63	5534.66	7682.1	4465.93	7567.73	7240.78	24247.6	3435.27	8197.82	27307.6	15094	11546.1	0.989666	0.848672	0.02637	0.010889	0.02637	-1.28497	863
BA_PE_APIP_Small_IP_BoutStdSize_mg	BA_PE_APIP_Small_IP_BoutStdSize_mg	355	2.83392	6.63226	3.33241	2.17189	1.39872	2.04548	3.58001	3.02277	3.83617	3.28395	5.12383	5.10002	8.56324	1.82652	5.53991	14.0984	6.32715	6.47903	0.997669	0.783555	0.010822	0.008245	0.010822	-1.2267	866
BA_PE_APIP_Small_IP_BoutStdIntensity_mgs	BA_PE_APIP_Small_IP_BoutStdIntensity_mgs	356	0.446971	0.494115	0.377837	0.549462	0.40984	0.372749	0.428275	0.329203	0.638144	0.470258	0.702056	0.461458	0.511993	0.365113	0.424118	0.569583	0.354839	0.563763	0.779099	0.929005	0.406042	0.065759	0.406042	-0.144667	685
BA_PE_APIP_Small_IP_BoutSlopeIntensity_mgs	BA_PE_APIP_Small_IP_BoutSlopeIntensity_mgs	357	0.449503	0.459847	0.626145	0.215465	0.597386	0.220652	0.667438	0.355041	0.387764	0.526133	0.575959	0.357411	0.345639	0.44513	0.651153	0.487768	0.353449	0.462265	0.479565	0.72707	0.891804	0.112053	0.891804	-0.032822	696
BA_LE_APIP_Small_TotalDur_ms	BA_LE_APIP_Small_TotalDur_ms	358	3177.49	4727.87	3147.67	1419.8	4164.33	2585.33	8569	1861.4	527.133	3145.27	563	58.4	6215.53	7543.87	10673.6	4966.92	7144.4	657.2	0.747319	0.91619	0.358547	0.059401	0.358547	-0.573301	700
BA_LE_APIP_Small_TotalIntake_mg	BA_LE_APIP_Small_TotalIntake_mg	359	26.2833	31.455	8.20086	17.6405	56.231	20.9896	60.6269	21.2634	4.37828	20.9356	7.14045	1.48494	33.3353	51.5815	61.7378	37.5936	49.8303	8.93613	0.639549	0.851136	0.644539	0.08951	0.644539	-0.259145	67
BA_LE_APIP_Small_Number	BA_LE_APIP_Small_Number	360	4.775	3.68654	2.2	3.4	6.46667	4.8	12.4667	2.8	1.46667	4.6	2.2	0.6	3.6	4.46667	5.8	4.69231	7.46667	0.666667	0.322688	0.562288	0.481142	0.073209	0.481142	0.373234	133
BA_LE_APIP_Small_Probability	BA_LE_APIP_Small_Probability	361	0.11383	0.102284	0.057692	0.108511	0.129506	0.115016	0.278689	0.072414	0.059783	0.089032	0.073333	0.017442	0.145553	0.149554	0.178279	0.113383	0.115345	0.025381	0.639549	0.849406	0.729487	0.09743	0.729487	0.15431	351
BA_LE_APIP_Small_PerCumIntake	BA_LE_APIP_Small_PerCumIntake	362	0.705569	0.745682	0.226543	0.497382	1.46181	0.501343	1.61242	0.601795	0.126297	0.616962	0.184032	0.034587	0.857683	1.12623	1.52314	0.885357	1.13251	0.221924	0.560761	0.796575	0.88411	0.111605	0.88411	-0.079775	460
BA_LE_APIP_Small_Dur_ms	BA_LE_APIP_Small_Dur_ms	363	678.278	1076.27	1430.76	417.588	643.969	538.611	687.353	664.786	359.409	683.754	255.909	97.3333	1726.54	1688.93	1840.28	1058.52	956.839	985.8	0.919736	0.96313	0.148473	0.031372	0.148473	-0.666088	432
BA_LE_APIP_Small_Size_mg	BA_LE_APIP_Small_Size_mg	364	5.24725	8.15782	3.72766	5.18838	8.69552	4.37283	4.86312	7.59407	2.98519	4.55121	3.24566	2.47491	9.2598	11.5481	10.6444	8.01175	6.6737	13.4042	0.93481	0.955936	0.078103	0.020558	0.078103	-0.636623	472
BA_LE_APIP_Small_MeanIntensity_mgs	BA_LE_APIP_Small_MeanIntensity_mgs	365	43.6287	25.5205	23.2727	53.7449	52.1928	61.5997	35.1501	27.8596	70.1206	25.089	31.2824	45.7337	19.0651	26.0736	26.6723	16.0706	21.959	17.3073	0.014064	0.071239	0.025374	0.010807	0.025374	0.77362	331
BA_LE_APIP_Small_RatioIntensity_mgs	BA_LE_APIP_Small_RatioIntensity_mgs	366	8.76403	10.5295	2.60538	12.4246	13.503	8.11871	7.07514	11.4233	8.30583	6.65622	12.6829	25.4271	5.36322	6.83754	5.78416	7.56879	6.97474	13.5973	0.520435	0.760791	0.52418	0.076425	0.52418	-0.264765	341
BA_PE_DCLC_Large_MeanTotalBoutDur_ms	BA_PE_DCLC_Large_MeanTotalBoutDur_ms	367	4.15519e+06	5.56127e+06	3.56982e+06	3.6232e+06	4.33869e+06	6.21424e+06	6.26565e+06	2.78168e+06	3.31503e+06	3133182	5.76402e+06	3.76335e+06	5.20764e+06	3.77069e+06	5.17784e+06	6.45505e+06	6.06162e+06	8.28997e+06	0.975058	0.90632	0.06769	0.018971	0.06769	-0.420502	446
BA_PE_DCLC_Large_MeanTotalBoutIntake_mg	BA_PE_DCLC_Large_MeanTotalBoutIntake_mg	368	3153.37	3479.34	2910.97	3185.81	3682.43	3537.3	3309.31	2846.62	3002.33	2752.17	3437.13	3306.13	3758.51	3412.15	3407.53	3338.99	3488.71	3685.55	0.981041	0.890351	0.026701	0.0109	0.026701	-0.141919	453
BA_PE_DCLC_Large_BoutRate_onperms	BA_PE_DCLC_Large_BoutRate_onperms	369	1e-06	0	0	0	1e-06	1e-06	1e-06	0	1e-06	1e-06	1e-06	0	0	0	0	0	0	0	0.018959	0.081503	0.037636	0.013482	0.037636	0.451265	439
BA_PE_DCLC_Large_BoutRate_onperactms	BA_PE_DCLC_Large_BoutRate_onperactms	370	2e-06	2e-06	2e-06	1e-06	3e-06	2e-06	2e-06	1e-06	2e-06	2e-06	2e-06	2e-06	2e-06	2e-06	2e-06	1e-06	1e-06	1e-06	0.399223	0.650545	0.583854	0.082891	0.583854	0.112726	711
BA_PE_DCLC_Large_BoutNumber	BA_PE_DCLC_Large_BoutNumber	371	44.0833	32.1904	33.4	23.3333	68.8	56.4667	45.7333	36.5333	43.4	45	40.7333	36.2667	27.5333	34.1333	29.7333	30.9231	29.6	28.6	0.018959	0.08097	0.038168	0.013583	0.038168	0.453604	722
BA_PE_DCLC_Large_BoutProbability	BA_PE_DCLC_Large_BoutProbability	372	0.42534	0.523989	0.381279	0.348259	0.554541	0.487903	0.501096	0.2751	0.50426	0.350285	0.582459	0.551165	0.591691	0.591908	0.495556	0.580087	0.258741	0.540302	0.981041	0.889116	0.083204	0.02133	0.083204	-0.300918	725
BA_PE_DCLC_Large_BoutPerCumIntake	BA_PE_DCLC_Large_BoutPerCumIntake	373	95.1239	97.6844	93.5002	97.7242	97.7637	97.5358	97.1421	89.1427	96.8493	91.333	97.4612	97.6218	98.5624	98.4273	97.7302	97.9839	95.6685	98.02	0.989666	0.84756	0.056584	0.017004	0.056584	-0.038321	714
BA_PE_DCLC_Large_BoutMeanDur_ms	BA_PE_DCLC_Large_BoutMeanDur_ms	374	99303.6	177802	106881	155280	63062.4	110052	137004	76140.8	76383.1	69626.3	141506	103769	189139	110469	174143	208745	204785	289859	0.997669	0.782614	0.006421	0.006878	0.006421	-0.840353	155
BA_PE_DCLC_Large_BoutMeanSize_mg	BA_PE_DCLC_Large_BoutMeanSize_mg	375	77.5593	110.165	87.1548	136.535	53.5237	62.644	72.361	77.9185	69.1781	61.1593	84.3813	91.1616	136.508	99.9653	114.603	107.977	117.862	128.865	0.994794	0.812549	0.011243	0.008274	0.011243	-0.5063	171
BA_PE_DCLC_Large_BoutMeanIntensity_mgs	BA_PE_DCLC_Large_BoutMeanIntensity_mgs	376	0.847557	0.687759	0.876126	0.929566	0.911306	0.60769	0.540699	1.03883	0.966645	0.909598	0.626341	0.946024	0.749916	0.920269	0.671674	0.538258	0.590162	0.459424	0.080264	0.203286	0.089825	0.022186	0.089825	0.301408	203
BA_PE_DCLC_Large_BoutRatioIntensity_mgs	BA_PE_DCLC_Large_BoutRatioIntensity_mgs	377	0.806034	0.662118	0.81544	0.879281	0.848743	0.569224	0.528166	1.02335	0.905672	0.878394	0.596308	0.878506	0.721731	0.904913	0.658098	0.517268	0.575541	0.44458	0.097436	0.23494	0.107604	0.025142	0.107604	0.283751	10
BA_PE_DCLC_Large_BoutSlopeIntensity_mgs	BA_PE_DCLC_Large_BoutSlopeIntensity_mgs	378	0.677866	0.591575	0.549824	0.761059	0.753922	0.472957	0.47976	0.890282	0.780017	0.735105	0.526275	0.750306	0.636098	0.826699	0.617093	0.486137	0.491363	0.398634	0.191142	0.375075	0.269143	0.048047	0.269143	0.196438	76
BA_PE_DCLC_Large_BoutMeanSize_evtnum	BA_PE_DCLC_Large_BoutMeanSize_evtnum	379	19.4979	44.2432	15.4052	17.0343	13.3343	41.4451	31.9329	8.69161	14.8879	13.2519	36.5646	18.2426	30.9298	27.4746	52.1659	57.2065	48.8041	82.5571	0.997669	0.781676	0.009382	0.00812	0.009382	-1.18214	615
BA_PE_DCLC_Large_BoutMeanSize_evtdur	BA_PE_DCLC_Large_BoutMeanSize_evtdur	380	55880	70546.8	66707.7	91724.3	35137.1	60991.8	54216.9	61998.4	36771.7	39491.9	38986.3	53953.4	90116	67348.7	81165.4	57993.7	98750.3	76060.3	0.919736	0.961589	0.153634	0.03184	0.153634	-0.336249	409
BA_PE_DCLC_Large_DC_MeanTotalBoutDur_ms	BA_PE_DCLC_Large_DC_MeanTotalBoutDur_ms	381	3.55653e+06	4.88395e+06	3.04994e+06	2.99729e+06	4.05099e+06	5.77249e+06	5.36444e+06	1.90378e+06	2.72819e+06	2.58514e+06	5.05239e+06	3.24513e+06	4.5976e+06	3.34319e+06	4.71233e+06	5.47115e+06	5305360	7.34443e+06	0.967521	0.917588	0.067518	0.018972	0.067518	-0.457576	147
BA_PE_DCLC_Large_DC_MeanTotalBoutIntake_mg	BA_PE_DCLC_Large_DC_MeanTotalBoutIntake_mg	382	2597.51	3033.96	2398.8	2556.13	3404.87	3247.39	2644.53	1890.48	2416.62	2221.29	3016.24	2841.47	3248.7	3002.68	3093.42	2837.97	3011.07	3220.15	0.967521	0.916258	0.034821	0.012945	0.034821	-0.224073	195
BA_PE_DCLC_Large_DC_BoutRate_onperms	BA_PE_DCLC_Large_DC_BoutRate_onperms	383	1e-06	1e-06	1e-06	0	1e-06	1e-06	1e-06	1e-06	1e-06	1e-06	1e-06	1e-06	1e-06	1e-06	1e-06	1e-06	1e-06	1e-06	0.032479	0.103526	0.074299	0.019798	0.074299	0.431501	163
BA_PE_DCLC_Large_DC_BoutRate_onperactms	BA_PE_DCLC_Large_DC_BoutRate_onperactms	384	2e-06	2e-06	2e-06	1e-06	3e-06	2e-06	2e-06	1e-06	2e-06	2e-06	2e-06	2e-06	2e-06	2e-06	2e-06	1e-06	1e-06	1e-06	0.399223	0.648927	0.710906	0.096255	0.710906	0.079201	413
BA_PE_DCLC_Large_DC_BoutNumber	BA_PE_DCLC_Large_DC_BoutNumber	385	38.675	28.6769	29.0667	19.6667	64.2	51.5333	40.5333	27.6667	38.3333	38.4	35.8667	32.0667	24.6	31.2	26.8667	27.6154	25.6667	25.5333	0.032479	0.103024	0.074295	0.019846	0.074295	0.431511	619
BA_PE_DCLC_Large_DC_BoutProbability	BA_PE_DCLC_Large_DC_BoutProbability	386	0.414445	0.526507	0.365159	0.328142	0.559558	0.492985	0.497138	0.238918	0.494836	0.338824	0.577253	0.552874	0.594203	0.587202	0.492063	0.598333	0.248547	0.561584	0.985936	0.868263	0.070378	0.019082	0.070378	-0.345273	88
BA_PE_DCLC_Large_DC_BoutPerCumIntake	BA_PE_DCLC_Large_DC_BoutPerCumIntake	387	94.3354	97.8824	92.5423	97.3949	97.8576	97.7007	96.9446	85.3785	96.5534	90.3111	97.6686	97.8553	98.644	98.3653	97.7357	98.5871	95.8841	98.3195	0.994794	0.811535	0.047958	0.01558	0.047958	-0.053251	22
BA_PE_DCLC_Large_DC_BoutMeanDur_ms	BA_PE_DCLC_Large_DC_BoutMeanDur_ms	388	96512.2	175497	104929	152405	63099.5	112015	132346	68811.5	71170.2	67321.3	140866	101200	186894	107154	175397	198120	206702	287641	0.996503	0.801917	0.006161	0.006943	0.006161	-0.862661	584
BA_PE_DCLC_Large_DC_BoutMeanSize_mg	BA_PE_DCLC_Large_DC_BoutMeanSize_mg	389	72.8766	107.793	82.5274	129.973	53.0354	63.0153	65.2434	68.3305	63.0422	57.846	84.0959	88.6114	132.061	96.2397	115.14	102.768	117.314	126.115	0.997669	0.78074	0.005638	0.006931	0.005638	-0.564739	506
BA_PE_DCLC_Large_DC_BoutMeanIntensity_mgs	BA_PE_DCLC_Large_DC_BoutMeanIntensity_mgs	390	0.831782	0.683871	0.859402	0.910555	0.902806	0.600135	0.514501	1.02064	0.955506	0.890713	0.625038	0.949254	0.738382	0.915563	0.669217	0.540296	0.578963	0.454251	0.117249	0.266953	0.115815	0.026601	0.115815	0.282482	570
BA_PE_DCLC_Large_DC_BoutRatioIntensity_mgs	BA_PE_DCLC_Large_DC_BoutRatioIntensity_mgs	391	0.784177	0.657316	0.786506	0.852812	0.840504	0.562563	0.492975	0.99301	0.885795	0.859254	0.596993	0.875611	0.706609	0.898147	0.656452	0.518715	0.567553	0.438448	0.164103	0.331986	0.149886	0.031183	0.149886	0.254593	610
BA_PE_DCLC_Large_DC_BoutSlopeIntensity_mgs	BA_PE_DCLC_Large_DC_BoutSlopeIntensity_mgs	392	0.61809	0.58696	0.476843	0.72169	0.756686	0.471183	0.421423	0.678893	0.715002	0.702998	0.531692	0.741183	0.622445	0.792183	0.621763	0.492017	0.502013	0.392383	0.439239	0.681749	0.652267	0.090005	0.652267	0.074554	487
BA_PE_DCLC_Large_DC_BoutMeanSize_evtnum	BA_PE_DCLC_Large_DC_BoutMeanSize_evtnum	393	19.5668	43.7667	15.2844	16.9864	13.6864	43.6184	31.6694	8.92771	13.4261	12.9358	36.4796	18.4615	31.1626	27.1218	53.4963	55.8914	49.8104	77.7102	0.997669	0.779806	0.008752	0.00789	0.008752	-1.16142	496
BA_PE_DCLC_Large_DC_BoutMeanSize_evtdur	BA_PE_DCLC_Large_DC_BoutMeanSize_evtdur	394	52697.8	69052.5	63231.7	87285.4	34855.5	61676.5	48863.5	54612.4	33482.1	37575.6	38899.4	52415.2	87146.4	64829.6	81587.9	55254.2	98165.7	74121.7	0.958508	0.926521	0.107813	0.025029	0.107813	-0.38995	326
BA_PE_DCLC_Large_LC_MeanTotalBoutDur_ms	BA_PE_DCLC_Large_LC_MeanTotalBoutDur_ms	395	598654	677324	519876	625904	287704	441754	901217	877893	586835	548046	711632	518218	610041	427497	465508	983896	756263	945539	0.747319	0.914474	0.46381	0.071989	0.46381	-0.178124	598
BA_PE_DCLC_Large_LC_MeanTotalBoutIntake_mg	BA_PE_DCLC_Large_LC_MeanTotalBoutIntake_mg	396	555.855	445.373	512.175	629.682	277.563	289.91	664.777	956.148	585.71	530.879	420.891	464.654	509.81	409.469	314.105	501.018	477.64	465.402	0.052448	0.149657	0.188297	0.037377	0.188297	0.319694	516
BA_PE_DCLC_Large_LC_BoutRate_onperms	BA_PE_DCLC_Large_LC_BoutRate_onperms	397	0	0	0	0	0	0	0	0	0	0	0	0	0	0	0	0	0	0	0.001476	0.029233	0.010877	0.008228	0.010877	0.619861	599
BA_PE_DCLC_Large_LC_BoutRate_onperactms	BA_PE_DCLC_Large_LC_BoutRate_onperactms	398	2e-06	1e-06	2e-06	1e-06	2e-06	2e-06	2e-06	2e-06	2e-06	2e-06	2e-06	1e-06	1e-06	2e-06	1e-06	1e-06	1e-06	1e-06	0.052448	0.149006	0.101282	0.023923	0.101282	0.329209	518
BA_PE_DCLC_Large_LC_BoutNumber	BA_PE_DCLC_Large_LC_BoutNumber	399	5.40833	3.51346	4.33333	3.66667	4.6	4.93333	5.2	8.86667	5.06667	6.6	4.86667	4.2	2.93333	2.93333	2.86667	3.30769	3.93333	3.06667	0.001476	0.028373	0.009653	0.008223	0.009653	0.622291	327
BA_PE_DCLC_Large_LC_BoutProbability	BA_PE_DCLC_Large_LC_BoutProbability	400	0.509369	0.517265	0.541667	0.518868	0.492857	0.440476	0.534247	0.521569	0.589147	0.436123	0.623932	0.538462	0.571429	0.647059	0.530864	0.462366	0.353293	0.410714	0.677312	0.862735	0.848102	0.109881	0.848102	-0.022191	497
BA_PE_DCLC_Large_LC_BoutPerCumIntake	BA_PE_DCLC_Large_LC_BoutPerCumIntake	401	97.4067	96.4818	98.2636	99.0843	96.6268	95.7258	97.9361	97.6556	98.0894	95.8721	96.0001	96.2181	98.0453	98.8846	97.6763	94.7017	94.3316	95.9964	0.164103	0.330961	0.212844	0.041339	0.212844	0.013765	611
BA_PE_DCLC_Large_LC_BoutMeanDur_ms	BA_PE_DCLC_Large_LC_BoutMeanDur_ms	402	114243	197970	119971	170701	62544.4	89544.8	173311	99010.5	115823	83037.3	146226	123385	207968	145738	162386	297457	192270	308328	0.996503	0.80093	0.010913	0.008199	0.010913	-0.793176	571
BA_PE_DCLC_Large_LC_BoutMeanSize_mg	BA_PE_DCLC_Large_LC_BoutMeanSize_mg	403	105.093	130.593	118.194	171.731	60.3397	58.7656	127.842	107.836	115.601	80.4363	86.4844	110.632	173.799	139.592	109.571	151.47	121.434	151.762	0.93481	0.954442	0.150116	0.031171	0.150116	-0.313408	585
BA_PE_DCLC_Large_LC_BoutMeanIntensity_mgs	BA_PE_DCLC_Large_LC_BoutMeanIntensity_mgs	404	0.955909	0.719495	0.9883	1.03154	1.02994	0.686608	0.744916	1.09557	1.05092	1.01947	0.635939	0.921367	0.846651	0.97032	0.694704	0.521246	0.663239	0.502493	0.003497	0.031298	0.012248	0.008549	0.012248	0.409888	517
BA_PE_DCLC_Large_LC_BoutRatioIntensity_mgs	BA_PE_DCLC_Large_LC_BoutRatioIntensity_mgs	405	0.925723	0.698671	0.985185	1.00604	0.96475	0.65627	0.737643	1.08914	0.998083	0.968677	0.591444	0.896637	0.835698	0.957829	0.674757	0.509218	0.631579	0.492208	0.003497	0.030875	0.014743	0.008961	0.014743	0.405966	507
BA_PE_DCLC_Large_LC_BoutSlopeIntensity_mgs	BA_PE_DCLC_Large_LC_BoutSlopeIntensity_mgs	406	0.802415	0.586144	0.977797	0.938778	0.663929	0.603146	0.639112	1.02872	0.824753	0.743084	0.481848	0.803836	0.753132	0.858465	0.545926	0.374123	0.4349	0.436926	0.024942	0.090044	0.028926	0.011421	0.028926	0.453092	736
BA_PE_DCLC_Large_LC_BoutMeanSize_evtnum	BA_PE_DCLC_Large_LC_BoutMeanSize_evtnum	407	17.9563	48.3752	16.2154	17.2909	8.42029	18.7432	33.9872	7.95489	25.9474	15.0909	37.1918	16.5714	28.9773	31.2273	39.6977	68.186	42.2373	122.913	0.998524	0.768523	0.026223	0.010869	0.026223	-1.42978	691
BA_PE_DCLC_Large_LC_BoutMeanSize_evtdur	BA_PE_DCLC_Large_LC_BoutMeanSize_evtdur	408	73969.4	83415.4	90023.5	115533	39067.8	53839.2	95945.6	85044.9	61659.8	50641	39626.3	65697.9	115020	94142.4	77205.7	80865.3	102565	92201.2	0.779099	0.927313	0.462219	0.071949	0.462219	-0.173386	680
BA_PE_DCLC_ActProb	BA_PE_DCLC_ActProb	409	0.300347	0.245396	0.276311	0.271265	0.32606	0.316885	0.266245	0.373806	0.295317	0.276887	0.212775	0.257532	0.217562	0.18103	0.232946	0.287219	0.291424	0.282679	0.018959	0.080445	0.013228	0.008569	0.013228	0.29152	702
BA_PE_DCLC_MeanFeedingCoeff_mgs	BA_PE_DCLC_MeanFeedingCoeff_mgs	410	1.44108	1.64777	1.31248	1.49386	1.54341	1.06449	1.36889	1.26171	1.91729	1.56652	2.23026	1.69601	1.51975	1.49116	1.42195	1.87945	1.20813	1.73545	0.882751	0.959776	0.169415	0.034646	0.169415	-0.193363	68
BA_PE_DCLC_LC_BoutThresh_mg	BA_PE_DCLC_LC_BoutThresh_mg	411	21.9966	36.8371	21.5571	24.9712	12.749	13.1413	21.9971	31.3259	26.3832	23.8484	25.8555	32.9486	38.7281	34.6554	29.1874	59.1933	39.1213	35.0073	0.999689	0.756938	0.003376	0.006408	0.003376	-0.743877	134
BA_PE_DCLC_DC_BoutThresh_mg	BA_PE_DCLC_DC_BoutThresh_mg	412	17.2565	16.7861	31.3259	15.1374	7.09646	6.54557	10.6295	31.3259	13.5456	22.446	14.3919	11.5241	15.9216	19.486	21.5571	12.8785	22.446	16.0832	0.639549	0.847683	0.9036	0.11288	0.9036	0.03988	47
BA_PE_DCLC_DC_ActProb	BA_PE_DCLC_DC_ActProb	413	0.485037	0.391246	0.443364	0.443076	0.55692	0.529274	0.416723	0.591838	0.47593	0.423172	0.345251	0.40237	0.335964	0.302697	0.384423	0.448391	0.464219	0.446649	0.018959	0.079926	0.009924	0.008259	0.009924	0.310021	113
BA_PE_DCLC_LC_ActProb	BA_PE_DCLC_LC_ActProb	414	0.083073	0.073291	0.076423	0.071697	0.057905	0.06863	0.090355	0.115982	0.081739	0.10185	0.056121	0.084225	0.075887	0.039707	0.05589	0.096269	0.089448	0.088782	0.220901	0.414787	0.335539	0.057075	0.335539	0.180734	123
BA_PE_DCLC_Large_TotalDur_ms	BA_PE_DCLC_Large_TotalDur_ms	415	4.15519e+06	5.56127e+06	3.56982e+06	3.6232e+06	4.33869e+06	6.21424e+06	6.26565e+06	2.78168e+06	3.31503e+06	3133182	5.76402e+06	3.76335e+06	5.20764e+06	3.77069e+06	5.17784e+06	6.45505e+06	6.06162e+06	8.28997e+06	0.975058	0.905033	0.06769	0.018922	0.06769	-0.420502	57
BA_PE_DCLC_Large_TotalIntake_mg	BA_PE_DCLC_Large_TotalIntake_mg	416	3153.37	3479.34	2910.97	3185.81	3682.43	3537.3	3309.31	2846.62	3002.33	2752.17	3437.13	3306.13	3758.51	3412.15	3407.53	3338.99	3488.71	3685.55	0.981041	0.887884	0.026701	0.010859	0.026701	-0.141919	25
BA_PE_DCLC_Large_Number	BA_PE_DCLC_Large_Number	417	44.0833	32.1904	33.4	23.3333	68.8	56.4667	45.7333	36.5333	43.4	45	40.7333	36.2667	27.5333	34.1333	29.7333	30.9231	29.6	28.6	0.018959	0.079413	0.038168	0.013538	0.038168	0.453604	91
BA_PE_DCLC_Large_Probability	BA_PE_DCLC_Large_Probability	418	0.42534	0.523989	0.381279	0.348259	0.554541	0.487903	0.501096	0.2751	0.50426	0.350285	0.582459	0.551165	0.591691	0.591908	0.495556	0.580087	0.258741	0.540302	0.981041	0.886656	0.083204	0.02128	0.083204	-0.300918	79
BA_PE_DCLC_Large_PerCumIntake	BA_PE_DCLC_Large_PerCumIntake	419	95.1239	97.6844	93.5002	97.7242	97.7637	97.5358	97.1421	89.1427	96.8493	91.333	97.4612	97.6218	98.5624	98.4273	97.7302	97.9839	95.6685	98.02	0.989666	0.846451	0.056584	0.016957	0.056584	-0.038321	13
BA_PE_DCLC_Large_Dur_ms	BA_PE_DCLC_Large_Dur_ms	420	99303.6	177802	106881	155280	63062.4	110052	137004	76140.8	76383.1	69626.3	141506	103769	189139	110469	174143	208745	204785	289859	0.997669	0.778874	0.006421	0.006811	0.006421	-0.840353	24
BA_PE_DCLC_Large_Size_mg	BA_PE_DCLC_Large_Size_mg	421	77.5593	110.165	87.1548	136.535	53.5237	62.644	72.361	77.9185	69.1781	61.1593	84.3813	91.1616	136.508	99.9653	114.603	107.977	117.862	128.865	0.994794	0.810523	0.011243	0.008219	0.011243	-0.5063	90
BA_PE_DCLC_Large_MeanIntensity_mgs	BA_PE_DCLC_Large_MeanIntensity_mgs	422	0.847557	0.687759	0.876126	0.929566	0.911306	0.60769	0.540699	1.03883	0.966645	0.909598	0.626341	0.946024	0.749916	0.920269	0.671674	0.538258	0.590162	0.459424	0.080264	0.202502	0.089825	0.022136	0.089825	0.301408	78
BA_PE_DCLC_Large_RatioIntensity_mgs	BA_PE_DCLC_Large_RatioIntensity_mgs	423	0.806034	0.662118	0.81544	0.879281	0.848743	0.569224	0.528166	1.02335	0.905672	0.878394	0.596308	0.878506	0.721731	0.904913	0.658098	0.517268	0.575541	0.44458	0.097436	0.234076	0.107604	0.025088	0.107604	0.283751	12
BA_PE_DCLC_Large_Rate_onperms	BA_PE_DCLC_Large_Rate_onperms	424	1e-06	0	0	0	1e-06	1e-06	1e-06	0	1e-06	1e-06	1e-06	0	0	0	0	0	0	0	0.018959	0.078907	0.037636	0.013438	0.037636	0.451265	309
BA_PE_DCLC_Large_Rate_onperactms	BA_PE_DCLC_Large_Rate_onperactms	425	2e-06	2e-06	2e-06	1e-06	3e-06	2e-06	2e-06	1e-06	2e-06	2e-06	2e-06	2e-06	2e-06	2e-06	2e-06	1e-06	1e-06	1e-06	0.399223	0.647317	0.583854	0.082783	0.583854	0.112726	397
BA_PE_DCLC_Large_ActProb	BA_PE_DCLC_Large_ActProb	426	2e-06	2e-06	2e-06	1e-06	3e-06	2e-06	2e-06	1e-06	2e-06	2e-06	2e-06	2e-06	2e-06	2e-06	2e-06	1e-06	1e-06	1e-06	0.399223	0.645715	0.583854	0.082674	0.583854	0.112726	399
BA_PE_DCLC_Small_MeanTotalBoutDur_ms	BA_PE_DCLC_Small_MeanTotalBoutDur_ms	427	294900	126566	526144	188187	112140	219336	160452	500762	232587	419594	100302	109181	80828.4	63756.9	121268	98790.3	325601	112799	0.003497	0.030463	0.020248	0.009957	0.020248	1.22034	52
BA_PE_DCLC_Small_MeanTotalBoutIntake_mg	BA_PE_DCLC_Small_MeanTotalBoutIntake_mg	428	156.632	82.458	202.362	74.1906	84.2327	89.3682	97.3584	346.709	97.672	261.166	89.5347	80.5406	54.8205	54.5192	79.1407	68.704	157.955	74.4488	0.014064	0.070691	0.070305	0.019158	0.070305	0.92565	118
BA_PE_DCLC_Small_BoutRate_onperms	BA_PE_DCLC_Small_BoutRate_onperms	429	1e-06	0	1e-06	1e-06	1e-06	1e-06	1e-06	1e-06	1e-06	1e-06	0	0	0	0	0	0	1e-06	0	0.003497	0.030063	0.019092	0.009789	0.019092	0.869716	128
BA_PE_DCLC_Small_BoutRate_onperactms	BA_PE_DCLC_Small_BoutRate_onperactms	430	2e-06	2e-06	2e-06	2e-06	2e-06	2e-06	2e-06	3e-06	2e-06	4e-06	2e-06	1e-06	1e-06	2e-06	2e-06	1e-06	4e-06	1e-06	0.003497	0.029672	0.047318	0.015702	0.047318	0.592428	62
BA_PE_DCLC_Small_BoutNumber	BA_PE_DCLC_Small_BoutNumber	431	60.0417	32.8814	54.2	43.6667	55.2667	59.2667	45.5333	96.2667	42.6667	83.4667	29.2	29.5333	19	23.5333	30.2667	22.3846	84.8	24.3333	0.003497	0.029292	0.019088	0.00988	0.019088	0.868692	315
BA_PE_DCLC_Small_BoutProbability	BA_PE_DCLC_Small_BoutProbability	432	0.57466	0.476011	0.618721	0.651741	0.445459	0.512097	0.498904	0.7249	0.49574	0.649715	0.417541	0.448835	0.408309	0.408092	0.504444	0.419913	0.741259	0.459698	0.024942	0.089549	0.083204	0.021432	0.083204	0.271711	406
BA_PE_DCLC_Small_BoutPerCumIntake	BA_PE_DCLC_Small_BoutPerCumIntake	433	4.87612	2.31559	6.49984	2.27578	2.23626	2.4642	2.85788	10.8573	3.15071	8.667	2.53879	2.37817	1.4376	1.57267	2.26981	2.01614	4.3315	1.98002	0.014064	0.070151	0.056584	0.017099	0.056584	1.07435	316
BA_PE_DCLC_Small_BoutMeanDur_ms	BA_PE_DCLC_Small_BoutMeanDur_ms	434	4868.87	3873.8	9707.45	4309.63	2029.07	3700.83	3523.83	5201.82	5451.25	5027.09	3434.99	3696.89	4254.13	2709.22	4006.64	4413.31	3839.64	4635.58	0.139316	0.295568	0.247378	0.045591	0.247378	0.329839	405
BA_PE_DCLC_Small_BoutMeanSize_mg	BA_PE_DCLC_Small_BoutMeanSize_mg	435	2.45282	2.7002	3.73361	1.69902	1.52411	1.5079	2.13818	3.60155	2.28919	3.12898	3.06626	2.72711	2.88529	2.31668	2.61478	3.06925	1.86268	3.05954	0.747319	0.912765	0.500254	0.074136	0.500254	-0.138626	404
BA_PE_DCLC_Small_BoutMeanIntensity_mgs	BA_PE_DCLC_Small_BoutMeanIntensity_mgs	436	1.04826	1.25806	0.95027	1.02047	1.25047	0.714392	1.07063	1.03134	1.19466	1.15381	1.64613	1.37265	1.21522	1.24371	1.04554	1.42764	0.865986	1.24763	0.975058	0.903749	0.060162	0.017496	0.060162	-0.263213	376
BA_PE_DCLC_Small_BoutRatioIntensity_mgs	BA_PE_DCLC_Small_BoutRatioIntensity_mgs	437	0.534867	0.707109	0.384613	0.394238	0.751137	0.407449	0.606776	0.692364	0.419938	0.622424	0.892655	0.737676	0.678234	0.855111	0.652613	0.695452	0.485119	0.660013	0.985936	0.867094	0.026187	0.010938	0.026187	-0.402751	422
BA_PE_DCLC_Small_BoutSlopeIntensity_mgs	BA_PE_DCLC_Small_BoutSlopeIntensity_mgs	438	0.247687	0.352094	0.248886	0.128447	0.190274	0.16006	0.297126	0.484763	0.137514	0.334428	0.35408	0.19006	0.323768	0.358614	0.441273	0.466756	0.32824	0.35396	0.975058	0.902469	0.065031	0.018417	0.065031	-0.507442	294
BA_PE_DCLC_Small_BoutMeanSize_evtnum	BA_PE_DCLC_Small_BoutMeanSize_evtnum	439	2.68259	2.31094	3.96679	2.72061	1.84801	2.37345	2.06442	2.41344	3.51406	2.5599	2.14155	1.94808	2.18596	1.84419	2.51101	2.72509	2.57547	2.55616	0.220901	0.413599	0.203143	0.039885	0.203143	0.215144	304
BA_PE_DCLC_Small_BoutMeanSize_evtdur	BA_PE_DCLC_Small_BoutMeanSize_evtdur	440	1787.94	1663.08	2819.04	1136.84	995.856	1486.31	1595.71	2919.82	1255.33	2094.65	1388.73	1608.6	1920.63	1562.35	1839.33	1593.52	1555.15	1836.32	0.639549	0.845967	0.652865	0.089973	0.652865	0.104445	390
BA_PE_DCLC_Small_DC_MeanTotalBoutDur_ms	BA_PE_DCLC_Small_DC_MeanTotalBoutDur_ms	441	274658	101578	514623	174109	102303	186391	140281	473319	218257	387978	82837.6	88463.1	58662.2	58864.6	111857	54983.3	274110	82842.2	0.002331	0.033848	0.014427	0.009021	0.014427	1.43505	377
BA_PE_DCLC_Small_DC_MeanTotalBoutIntake_mg	BA_PE_DCLC_Small_DC_MeanTotalBoutIntake_mg	442	143.041	65.6834	193.311	68.3713	74.5431	76.4234	83.3489	323.755	86.2633	238.308	71.9981	62.2772	44.6568	49.9004	71.6684	40.6733	129.254	55.0387	0.003497	0.028921	0.047902	0.015609	0.047902	1.12282	423
BA_PE_DCLC_Small_DC_BoutRate_onperms	BA_PE_DCLC_Small_DC_BoutRate_onperms	443	1e-06	1e-06	1e-06	1e-06	1e-06	1e-06	1e-06	2e-06	1e-06	2e-06	1e-06	1e-06	0	1e-06	1e-06	0	2e-06	0	0.003497	0.028559	0.017594	0.009761	0.017594	0.89837	295
BA_PE_DCLC_Small_DC_BoutRate_onperactms	BA_PE_DCLC_Small_DC_BoutRate_onperactms	444	3e-06	2e-06	3e-06	2e-06	2e-06	2e-06	2e-06	3e-06	2e-06	4e-06	2e-06	1e-06	1e-06	2e-06	2e-06	1e-06	4e-06	1e-06	0.003497	0.028207	0.051207	0.016293	0.051207	0.61719	305
BA_PE_DCLC_Small_DC_BoutNumber	BA_PE_DCLC_Small_DC_BoutNumber	445	54.6917	29.3423	50.5333	40.2667	50.5333	53	41	88.1333	39.1333	74.9333	26.2667	25.9333	16.8	21.9333	27.7333	18.5385	77.6	19.9333	0.003497	0.027863	0.017598	0.009714	0.017598	0.898339	391
BA_PE_DCLC_Small_DC_BoutProbability	BA_PE_DCLC_Small_DC_BoutProbability	446	0.585555	0.473493	0.634841	0.671858	0.440442	0.507015	0.502862	0.761082	0.505164	0.661176	0.422747	0.447126	0.405797	0.412798	0.507937	0.401667	0.751453	0.438416	0.018959	0.078408	0.070378	0.019034	0.070378	0.306463	296
BA_PE_DCLC_Small_DC_BoutPerCumIntake	BA_PE_DCLC_Small_DC_BoutPerCumIntake	447	5.66462	2.11755	7.45767	2.60512	2.14241	2.29927	3.05545	14.6215	3.44656	9.68891	2.33136	2.14472	1.35596	1.6347	2.26434	1.41293	4.11595	1.68048	0.007382	0.043849	0.047958	0.015534	0.047958	1.41958	378
BA_PE_DCLC_Small_DC_BoutMeanDur_ms	BA_PE_DCLC_Small_DC_BoutMeanDur_ms	448	4949.49	3428.5	10183.8	4323.91	2024.47	3516.8	3421.49	5370.48	5577.27	5177.64	3153.72	3411.17	3491.8	2683.8	4033.31	2965.9	3532.35	4155.96	0.041492	0.124369	0.10496	0.024631	0.10496	0.529701	306
BA_PE_DCLC_Small_DC_BoutMeanSize_mg	BA_PE_DCLC_Small_DC_BoutMeanSize_mg	449	2.44143	2.41009	3.82541	1.69796	1.47513	1.44195	2.0329	3.67347	2.20434	3.18027	2.74105	2.40144	2.65814	2.27509	2.58419	2.19399	1.66565	2.76114	0.677312	0.861057	0.93354	0.115289	0.93354	0.018641	392
BA_PE_DCLC_Small_DC_BoutMeanIntensity_mgs	BA_PE_DCLC_Small_DC_BoutMeanIntensity_mgs	450	1.04108	1.25588	0.942016	1.0238	1.25424	0.712795	1.06638	1.02193	1.16182	1.14567	1.65108	1.36886	1.223	1.23989	1.03701	1.41747	0.862647	1.24707	0.975058	0.901192	0.054867	0.017008	0.054867	-0.270616	572
BA_PE_DCLC_Small_DC_BoutRatioIntensity_mgs	BA_PE_DCLC_Small_DC_BoutRatioIntensity_mgs	451	0.524329	0.71231	0.375636	0.392692	0.728649	0.410018	0.594156	0.684011	0.395237	0.614231	0.869148	0.703991	0.761253	0.847715	0.640713	0.739739	0.471541	0.66438	0.994794	0.809513	0.015524	0.009029	0.015524	-0.442034	586
BA_PE_DCLC_Small_DC_BoutSlopeIntensity_mgs	BA_PE_DCLC_Small_DC_BoutSlopeIntensity_mgs	452	0.24084	0.288582	0.248001	0.123998	0.182062	0.146632	0.281284	0.486062	0.127423	0.331256	0.265743	0.138455	0.278634	0.353824	0.413222	0.288494	0.294514	0.275772	0.882751	0.958182	0.374969	0.061	0.374969	-0.260908	508
BA_PE_DCLC_Small_DC_BoutMeanSize_evtnum	BA_PE_DCLC_Small_DC_BoutMeanSize_evtnum	453	2.72058	2.22959	4.10026	2.72185	1.83773	2.35472	2.04228	2.46445	3.63032	2.61299	2.09137	1.97172	2.05159	1.86018	2.59615	2.29875	2.51546	2.45151	0.097436	0.233218	0.112431	0.02599	0.112431	0.287132	467
BA_PE_DCLC_Small_DC_BoutMeanSize_evtdur	BA_PE_DCLC_Small_DC_BoutMeanSize_evtdur	454	1785.07	1494.17	2891.71	1137.01	963.66	1432.69	1522.51	2988.16	1209.39	2135.47	1247.14	1428.96	1755.27	1535.14	1815.36	1152.29	1380.78	1638.42	0.479565	0.725387	0.337414	0.057035	0.337414	0.256638	20
BA_PE_DCLC_Small_LC_MeanTotalBoutDur_ms	BA_PE_DCLC_Small_LC_MeanTotalBoutDur_ms	455	20242.6	24988.3	11520.9	14077.7	9836.87	32945.1	20170.8	27443.1	14329.5	31616.5	17464	20718.4	22166.2	4892.33	9410.33	43807	51491.4	29956.8	0.677312	0.859385	0.481377	0.072733	0.481377	-0.303862	86
BA_PE_DCLC_Small_LC_MeanTotalBoutIntake_mg	BA_PE_DCLC_Small_LC_MeanTotalBoutIntake_mg	456	13.5918	16.7746	9.0508	5.81923	9.68951	12.9447	14.0095	22.9542	11.4087	22.8575	17.5366	18.2633	10.1638	4.61883	7.47238	28.0307	28.7014	19.4101	0.747319	0.911062	0.422743	0.067854	0.422743	-0.303548	367
BA_PE_DCLC_Small_LC_BoutRate_onperms	BA_PE_DCLC_Small_LC_BoutRate_onperms	457	0	0	0	0	0	0	0	0	0	0	0	0	0	0	0	0	0	0	0.032479	0.102526	0.080209	0.020809	0.080209	0.595271	415
BA_PE_DCLC_Small_LC_BoutRate_onperactms	BA_PE_DCLC_Small_LC_BoutRate_onperactms	458	2e-06	1e-06	1e-06	1e-06	2e-06	2e-06	1e-06	2e-06	1e-06	2e-06	1e-06	1e-06	1e-06	1e-06	1e-06	1e-06	2e-06	1e-06	0.032479	0.102033	0.069649	0.019076	0.069649	0.440225	287
BA_PE_DCLC_Small_LC_BoutNumber	BA_PE_DCLC_Small_LC_BoutNumber	459	5.35	3.5391	3.66667	3.4	4.73333	6.26667	4.53333	8.13333	3.53333	8.53333	2.93333	3.6	2.2	1.6	2.53333	3.84615	7.2	4.4	0.032479	0.101545	0.078246	0.020397	0.078246	0.596155	98
BA_PE_DCLC_Small_LC_BoutProbability	BA_PE_DCLC_Small_LC_BoutProbability	460	0.490631	0.482735	0.458333	0.481132	0.507143	0.559524	0.465753	0.478431	0.410853	0.563877	0.376068	0.461538	0.428571	0.352941	0.469136	0.537634	0.646707	0.589286	0.360451	0.603931	0.848102	0.109749	0.848102	0.023406	32
BA_PE_DCLC_Small_LC_BoutPerCumIntake	BA_PE_DCLC_Small_LC_BoutPerCumIntake	461	2.59329	3.51823	1.73645	0.915693	3.37317	4.27423	2.06391	2.34442	1.91062	4.12786	3.99989	3.78188	1.95467	1.11542	2.32367	5.29832	5.66838	4.00363	0.860684	0.954849	0.212844	0.041265	0.212844	-0.440066	290
BA_PE_DCLC_Small_LC_BoutMeanDur_ms	BA_PE_DCLC_Small_LC_BoutMeanDur_ms	462	3775.27	6738.3	3142.05	4140.51	2078.21	5257.19	4449.44	3374.16	4055.53	3705.05	5953.64	5755.11	10075.5	3057.71	3714.61	11389.8	7151.58	6808.36	0.989666	0.845344	0.014695	0.009084	0.014695	-0.835805	418
BA_PE_DCLC_Small_LC_BoutMeanSize_mg	BA_PE_DCLC_Small_LC_BoutMeanSize_mg	463	2.51409	4.64919	2.4684	1.71154	2.04708	2.06565	3.09034	2.82224	3.22886	2.67861	5.97839	5.07315	4.61989	2.88677	2.94963	7.28798	3.9863	4.41139	0.999456	0.76206	0.00185	0.006671	0.00185	-0.886942	372
BA_PE_DCLC_Small_LC_BoutMeanIntensity_mgs	BA_PE_DCLC_Small_LC_BoutMeanIntensity_mgs	464	1.12617	1.27766	1.06404	0.980962	1.21022	0.727906	1.1091	1.13335	1.55847	1.22534	1.60188	1.39996	1.15581	1.29599	1.1389	1.47665	0.901972	1.25015	0.947552	0.945297	0.203944	0.03997	0.203944	-0.18208	300
BA_PE_DCLC_Small_LC_BoutRatioIntensity_mgs	BA_PE_DCLC_Small_LC_BoutRatioIntensity_mgs	465	0.703375	0.740944	0.785601	0.413364	0.98502	0.392919	0.694545	0.836429	0.796164	0.722962	1.00416	0.881504	0.458525	0.944096	0.794062	0.639868	0.557401	0.647936	0.639549	0.844258	0.71249	0.096349	0.71249	-0.075069	386
BA_PE_DCLC_Small_LC_BoutSlopeIntensity_mgs	BA_PE_DCLC_Small_LC_BoutSlopeIntensity_mgs	466	0.398008	0.462423	0.647927	0.216022	0.539258	0.201	0.357705	0.441004	0.388681	0.392465	0.581404	0.354048	0.346275	0.443513	0.653116	0.488762	0.371324	0.460945	0.808858	0.937129	0.344772	0.057827	0.344772	-0.216418	601
BA_PE_DCLC_Small_LC_BoutMeanSize_evtnum	BA_PE_DCLC_Small_LC_BoutMeanSize_evtnum	467	2.22104	2.72716	2.12727	2.70588	1.95775	2.53192	2.26471	1.86066	2.22641	2.09375	2.59091	1.77778	3.21212	1.625	1.57895	4.78	3.22222	3.0303	0.779099	0.925627	0.222395	0.042135	0.222395	-0.296162	574
BA_PE_DCLC_Small_LC_BoutMeanSize_evtdur	BA_PE_DCLC_Small_LC_BoutMeanSize_evtdur	468	1771.13	2833.41	1817.42	1134.78	1339.59	1939.87	2257.72	2179.31	1764.17	1736.21	2656.57	2902.69	3183.33	1935.38	2101.76	3720.2	3434.48	2732.85	0.999068	0.768037	0.000998	0.0072	0.000998	-0.677864	588
BA_PE_DCLC_Small_TotalDur_ms	BA_PE_DCLC_Small_TotalDur_ms	469	294900	126566	526144	188187	112140	219336	160452	500762	232587	419594	100302	109181	80828.4	63756.9	121268	98790.3	325601	112799	0.003497	0.027527	0.020248	0.009912	0.020248	1.22034	582
BA_PE_DCLC_Small_TotalIntake_mg	BA_PE_DCLC_Small_TotalIntake_mg	470	156.632	82.458	202.362	74.1906	84.2327	89.3682	97.3584	346.709	97.672	261.166	89.5347	80.5406	54.8205	54.5192	79.1407	68.704	157.955	74.4488	0.014064	0.06962	0.070305	0.01911	0.070305	0.92565	502
BA_PE_DCLC_Small_Number	BA_PE_DCLC_Small_Number	471	60.0417	32.8814	54.2	43.6667	55.2667	59.2667	45.5333	96.2667	42.6667	83.4667	29.2	29.5333	19	23.5333	30.2667	22.3846	84.8	24.3333	0.003497	0.0272	0.019088	0.009833	0.019088	0.868692	492
BA_PE_DCLC_Small_Probability	BA_PE_DCLC_Small_Probability	472	0.57466	0.476011	0.618721	0.651741	0.445459	0.512097	0.498904	0.7249	0.49574	0.649715	0.417541	0.448835	0.408309	0.408092	0.504444	0.419913	0.741259	0.459698	0.024942	0.08906	0.083204	0.021381	0.083204	0.271711	486
BA_PE_DCLC_Small_PerCumIntake	BA_PE_DCLC_Small_PerCumIntake	473	4.87612	2.31559	6.49984	2.27578	2.23626	2.4642	2.85788	10.8573	3.15071	8.667	2.53879	2.37817	1.4376	1.57267	2.26981	2.01614	4.3315	1.98002	0.014064	0.069096	0.056584	0.017051	0.056584	1.07435	568
BA_PE_DCLC_Small_Dur_ms	BA_PE_DCLC_Small_Dur_ms	474	4868.87	3873.8	9707.45	4309.63	2029.07	3700.83	3523.83	5201.82	5451.25	5027.09	3434.99	3696.89	4254.13	2709.22	4006.64	4413.31	3839.64	4635.58	0.139316	0.294611	0.247378	0.045514	0.247378	0.329839	608
BA_PE_DCLC_Small_Size_mg	BA_PE_DCLC_Small_Size_mg	475	2.45282	2.7002	3.73361	1.69902	1.52411	1.5079	2.13818	3.60155	2.28919	3.12898	3.06626	2.72711	2.88529	2.31668	2.61478	3.06925	1.86268	3.05954	0.747319	0.909365	0.500254	0.074034	0.500254	-0.138626	324
BA_PE_DCLC_Small_MeanIntensity_mgs	BA_PE_DCLC_Small_MeanIntensity_mgs	476	1.04826	1.25806	0.95027	1.02047	1.25047	0.714392	1.07063	1.03134	1.19466	1.15381	1.64613	1.37265	1.21522	1.24371	1.04554	1.42764	0.865986	1.24763	0.975058	0.89992	0.060162	0.017449	0.060162	-0.263213	514
BA_PE_DCLC_Small_RatioIntensity_mgs	BA_PE_DCLC_Small_RatioIntensity_mgs	477	0.534867	0.707109	0.384613	0.394238	0.751137	0.407449	0.606776	0.692364	0.419938	0.622424	0.892655	0.737676	0.678234	0.855111	0.652613	0.695452	0.485119	0.660013	0.985936	0.865929	0.026187	0.010896	0.026187	-0.402751	597
BA_PE_DCLC_Small_Rate_onperms	BA_PE_DCLC_Small_Rate_onperms	478	1e-06	0	1e-06	1e-06	1e-06	1e-06	1e-06	1e-06	1e-06	1e-06	0	0	0	0	0	0	1e-06	0	0.003497	0.02688	0.019092	0.009742	0.019092	0.869716	325
BA_PE_DCLC_Small_Rate_onperactms	BA_PE_DCLC_Small_Rate_onperactms	479	2e-06	2e-06	2e-06	2e-06	2e-06	2e-06	2e-06	3e-06	2e-06	4e-06	2e-06	1e-06	1e-06	2e-06	2e-06	1e-06	4e-06	1e-06	0.003497	0.026567	0.047318	0.015654	0.047318	0.592428	494
BA_PE_DCLC_Small_ActProb	BA_PE_DCLC_Small_ActProb	480	2e-06	2e-06	2e-06	2e-06	2e-06	2e-06	2e-06	3e-06	2e-06	4e-06	2e-06	1e-06	1e-06	2e-06	2e-06	1e-06	4e-06	1e-06	0.003497	0.026262	0.047318	0.015607	0.047318	0.592428	609
BA_LE_APIP_Large_MeanTotalBoutDur_ms	BA_LE_APIP_Large_MeanTotalBoutDur_ms	481	381599	485631	592000	278000	367661	358875	398765	327537	305081	424877	506827	525742	552063	517504	452121	510743	446068	373981	0.992618	0.824165	0.02114	0.010119	0.02114	-0.347802	569
BA_LE_APIP_Large_MeanTotalBoutIntake_mg	BA_LE_APIP_Large_MeanTotalBoutIntake_mg	482	3642.88	4139.31	3611.8	3529.03	3790.44	4165.68	3699.37	3512.07	3462.29	3372.4	3872.86	4291.85	3853.33	4528.42	3991.6	4208.56	4350.17	4017.73	0.999456	0.761172	0.001233	0.007021	0.001233	-0.184311	504
BA_LE_APIP_Large_BoutNumber	BA_LE_APIP_Large_BoutNumber	483	35.3167	31.8032	35.9333	27.9333	43.4667	36.9333	32.2667	35.8667	23.0667	47.0667	27.8	33.8	21.1333	25.4	26.7333	36.6923	57.2667	25.6	0.117249	0.266026	0.483291	0.072819	0.483291	0.151177	583
BA_LE_APIP_Large_BoutProbability	BA_LE_APIP_Large_BoutProbability	484	0.88617	0.897716	0.942308	0.891489	0.870494	0.884984	0.721311	0.927586	0.940217	0.910968	0.926667	0.982558	0.854447	0.850446	0.821721	0.886617	0.884655	0.974619	0.399223	0.64412	0.729487	0.097913	0.729487	-0.018677	573
BA_LE_APIP_Large_BoutPerCumIntake	BA_LE_APIP_Large_BoutPerCumIntake	485	99.2944	99.2543	99.7735	99.5026	98.5382	99.4987	98.3876	99.3982	99.8737	99.383	99.816	99.9654	99.1423	98.8738	98.4769	99.1146	98.8675	99.7781	0.479565	0.723712	0.88411	0.112392	0.88411	0.000583	587
BA_LE_APIP_Large_BoutMeanDur_ms	BA_LE_APIP_Large_BoutMeanDur_ms	486	11043.3	16689.1	16474.9	9952.25	8458.45	9716.84	12358.4	9132.06	13226.1	9027.14	18231.2	15554.5	26122.8	20374.2	16912.3	13919.6	7789.31	14608.7	0.989666	0.844241	0.018386	0.009798	0.018386	-0.595736	505
BA_LE_APIP_Large_BoutMeanSize_mg	BA_LE_APIP_Large_BoutMeanSize_mg	487	11.0593	9.23232	7.27212	13.1088	12.8167	12.5517	10.2974	11.4175	12.0558	8.95456	8.17911	8.75172	7.52797	8.95036	9.46936	8.95488	10.5758	11.4494	0.041492	0.123801	0.051313	0.016137	0.051313	0.260499	495
BA_LE_APIP_Large_BoutMeanIntensity_mgs	BA_LE_APIP_Large_BoutMeanIntensity_mgs	488	381599	485631	592000	278000	367661	358875	398765	327537	305081	424877	506827	525742	552063	517504	452121	510743	446068	373981	0.992618	0.823119	0.02114	0.010075	0.02114	-0.347802	515
BA_LE_APIP_Large_BoutRatioIntensity_mgs	BA_LE_APIP_Large_BoutRatioIntensity_mgs	489	35.3167	31.8032	35.9333	27.9333	43.4667	36.9333	32.2667	35.8667	23.0667	47.0667	27.8	33.8	21.1333	25.4	26.7333	36.6923	57.2667	25.6	0.117249	0.265106	0.483291	0.072718	0.483291	0.151177	849
BA_LE_APIP_Large_BoutSlopeIntensity_mgs	BA_LE_APIP_Large_BoutSlopeIntensity_mgs	490	0.88617	0.897716	0.942308	0.891489	0.870494	0.884984	0.721311	0.927586	0.940217	0.910968	0.926667	0.982558	0.854447	0.850446	0.821721	0.886617	0.884655	0.974619	0.399223	0.642534	0.729487	0.097792	0.729487	-0.018677	757
BA_LE_APIP_Large_AP_MeanTotalBoutDur_ms	BA_LE_APIP_Large_AP_MeanTotalBoutDur_ms	491	99.2944	99.2543	99.7735	99.5026	98.5382	99.4987	98.3876	99.3982	99.8737	99.383	99.816	99.9654	99.1423	98.8738	98.4769	99.1146	98.8675	99.7781	0.479565	0.722045	0.88411	0.11226	0.88411	0.000583	746
BA_LE_APIP_Large_AP_MeanTotalBoutIntake_mg	BA_LE_APIP_Large_AP_MeanTotalBoutIntake_mg	492	11043.3	16689.1	16474.9	9952.25	8458.45	9716.84	12358.4	9132.06	13226.1	9027.14	18231.2	15554.5	26122.8	20374.2	16912.3	13919.6	7789.31	14608.7	0.989666	0.84314	0.018386	0.00975	0.018386	-0.595736	768
BA_LE_APIP_Large_AP_BoutNumber	BA_LE_APIP_Large_AP_BoutNumber	493	6369.89	8350.43	10808.1	3499.59	7004.39	5524.62	7353.85	4497.33	5991.6	6279.65	7824.3	7399.25	14437.8	7715.71	8323.12	8468.7	5558.09	7076.51	0.985936	0.864767	0.123446	0.027881	0.123446	-0.390583	209
BA_LE_APIP_Large_AP_BoutProbability	BA_LE_APIP_Large_AP_BoutProbability	494	107.646	140.478	100.514	126.337	87.2033	112.789	114.65	97.9202	150.099	71.6515	139.311	126.978	182.334	178.284	149.312	114.699	75.9634	156.943	0.985936	0.863607	0.046255	0.015589	0.046255	-0.384055	161
BA_LE_APIP_Large_AP_BoutPerCumIntake	BA_LE_APIP_Large_AP_BoutPerCumIntake	495	44.6834	53.9174	45.2095	40.5625	49.2276	42.5487	50.7165	38.5833	54.89	35.7286	45.6012	45.2359	79.07	59.8373	59.6434	51.0778	37.0338	53.8398	0.967521	0.914932	0.089903	0.022104	0.089903	-0.271014	157
BA_LE_APIP_Large_AP_BoutMeanDur_ms	BA_LE_APIP_Large_AP_BoutMeanDur_ms	496	11.0593	9.23232	7.27212	13.1088	12.8167	12.5517	10.2974	11.4175	12.0558	8.95456	8.17911	8.75172	7.52797	8.95036	9.46936	8.95488	10.5758	11.4494	0.041492	0.123238	0.051313	0.01609	0.051313	0.260499	173
BA_LE_APIP_Large_AP_BoutMeanSize_mg	BA_LE_APIP_Large_AP_BoutMeanSize_mg	497	9.9998	8.6374	6.10101	12.6944	10.3096	11.6076	9.27707	10.7227	11.3487	7.93735	7.64138	8.1634	6.97988	8.75051	8.82859	8.24007	9.75226	10.7431	0.080264	0.201723	0.138473	0.029723	0.138473	0.211302	205
BA_LE_APIP_Large_AP_BoutMeanIntensity_mgs	BA_LE_APIP_Large_AP_BoutMeanIntensity_mgs	498	345518	432173	543562	252629	351519	332098	367044	262151	279799	375342	462217	458835	493396	469882	423413	420645	387950	341043	0.989666	0.842042	0.035772	0.013163	0.035772	-0.322846	206
BA_LE_APIP_Large_AP_BoutRatioIntensity_mgs	BA_LE_APIP_Large_AP_BoutRatioIntensity_mgs	499	32.2417	28.8442	32.8667	25.1333	41.0667	34.6	30.0667	30.6	21.6	42	25.7333	29.7333	19.4667	23.6	25.2667	31.1538	51.9333	23.8667	0.117249	0.264192	0.446222	0.069962	0.446222	0.160644	174
BA_LE_APIP_Large_AP_BoutSlopeIntensity_mgs	BA_LE_APIP_Large_AP_BoutSlopeIntensity_mgs	500	0.888843	0.902223	0.942639	0.895487	0.877493	0.902609	0.723917	0.921687	0.93913	0.907781	0.93012	0.98022	0.853801	0.861314	0.832967	0.886214	0.892325	0.980822	0.399223	0.640955	0.680322	0.092928	0.680322	-0.021556	158
BA_LE_APIP_Large_IP_MeanTotalBoutDur_ms	BA_LE_APIP_Large_IP_MeanTotalBoutDur_ms	501	99.2977	99.3922	99.783	99.5619	98.5247	99.5904	98.4103	99.3226	99.8673	99.3216	99.853	99.9614	99.2231	99.488	98.7271	99.1389	98.9163	99.8297	0.600777	0.824732	0.715093	0.09646	0.715093	-0.001372	210
BA_LE_APIP_Large_IP_MeanTotalBoutIntake_mg	BA_LE_APIP_Large_IP_MeanTotalBoutIntake_mg	502	10926.6	16333.6	16538.4	10051.5	8559.72	9598.2	12207.7	8567.04	12953.6	8936.72	17961.8	15431.7	25345.7	19910.3	16757.8	13502.2	7470.15	14289.5	0.989666	0.840947	0.021224	0.009983	0.021224	-0.579998	178
BA_LE_APIP_Large_IP_BoutNumber	BA_LE_APIP_Large_IP_BoutNumber	503	6198.69	7771.57	11023.5	3380.88	7089.52	5081.15	7009.25	4214.83	5711.74	6078.74	7698.41	7164.1	13103.8	7391.08	8401.59	7745.72	4730.79	5937.09	0.967521	0.91361	0.209506	0.040986	0.209506	-0.326242	162
BA_LE_APIP_Large_IP_BoutProbability	BA_LE_APIP_Large_IP_BoutProbability	504	107.431	140.56	100.93	128.199	88.3421	113.507	115.439	93.7241	147.962	71.3479	139.918	129.445	181.046	176.093	149.134	114.65	75.2701	158.926	0.985936	0.862451	0.043231	0.01499	0.043231	-0.387773	193
BA_LE_APIP_Large_IP_BoutPerCumIntake	BA_LE_APIP_Large_IP_BoutPerCumIntake	505	44.3466	53.6089	45.3846	40.1325	49.4962	42.6574	50.9688	36.8827	53.2632	35.9876	46.083	44.2557	78.4788	60.2782	60.5331	49.8952	36.1776	53.1699	0.947552	0.943856	0.092167	0.022406	0.092167	-0.273649	225
BA_LE_APIP_Large_IP_BoutMeanDur_ms	BA_LE_APIP_Large_IP_BoutMeanDur_ms	506	11.1334	9.36677	7.32786	13.1224	12.8615	12.6617	10.4046	11.6228	12.1034	8.96288	8.31003	8.97251	7.61682	9.00417	9.54214	9.11596	10.7557	11.6168	0.052448	0.148361	0.059975	0.017583	0.059975	0.24927	177
BA_LE_APIP_Large_IP_BoutStdDur_ms	BA_LE_APIP_Large_IP_BoutStdDur_ms	507	2.69286	1.93132	2.28531	2.60531	3.92729	2.4693	3.04151	2.20269	2.79982	2.21166	1.78418	1.98357	1.81173	1.63217	2.10755	1.7991	1.98176	2.35053	0.000544	0.03231	0.003801	0.006633	0.003801	0.479549	226
BA_LE_APIP_Large_IP_BoutStdSize_mg	BA_LE_APIP_Large_IP_BoutStdSize_mg	508	5.88739	5.54338	3.25965	8.48425	5.92003	6.11944	4.83645	6.78457	7.08458	4.61011	4.3803	4.54478	4.99026	6.61928	6.23731	5.18599	6.23412	6.15502	0.360451	0.602387	0.607117	0.085298	0.607117	0.086861	194
BA_LE_APIP_Large_IP_BoutStdIntensity_mgs	BA_LE_APIP_Large_IP_BoutStdIntensity_mgs	509	314.637	367.876	294.552	306.963	162.519	238.341	228.506	644.113	266.316	375.787	272.3	443.025	328.965	372.618	223.471	636.782	441.142	224.708	0.779099	0.923947	0.469232	0.072312	0.469232	-0.225531	216
BA_LE_APIP_Large_IP_BoutSlopeIntensity_mgs	BA_LE_APIP_Large_IP_BoutSlopeIntensity_mgs	510	0.849232	0.843243	0.938776	0.857143	0.765957	0.686275	0.6875	0.963415	0.956522	0.938272	0.885714	1	0.862069	0.72973	0.666667	0.888889	0.816327	0.896552	0.399223	0.639384	0.916594	0.113846	0.916594	0.01021	184
BA_LE_APIP_Large_TotalDur_ms	BA_LE_APIP_Large_TotalDur_ms	511	99.1258	97.6111	99.6661	98.8841	98.8398	98.0105	98.044	99.7362	99.95	99.8756	99.3294	100	98.285	92.5038	94.4411	98.9789	98.4368	98.914	0.220901	0.412417	0.145107	0.030841	0.145107	0.022215	792
BA_LE_APIP_Large_TotalIntake_mg	BA_LE_APIP_Large_TotalIntake_mg	512	12113.2	20679.6	15794.8	9060.93	6725.53	11476.2	14418.8	12414.9	17238.2	9776.66	21585.8	16452.8	35199.8	26456.4	19574	16267.7	10897.1	19003	0.997669	0.777945	0.010502	0.008057	0.010502	-0.77162	814
BA_LE_APIP_Large_Number	BA_LE_APIP_Large_Number	513	7436.71	11820.7	8214.44	4374.02	5109.98	9983.76	10985.2	4705.63	8365.24	7755.36	8704.95	8951.4	23862.9	9330.52	6410.81	11526	10214	15565.4	0.985936	0.861298	0.060414	0.017382	0.060414	-0.668585	394
BA_LE_APIP_Large_Probability	BA_LE_APIP_Large_Probability	514	107.182	140.598	96.0496	109.63	67.7163	102.146	103.867	122.3	181.579	74.1686	131.758	108.941	197.379	207.01	152.366	114.975	82.7141	129.639	0.975058	0.89865	0.110635	0.025629	0.110635	-0.391511	380
BA_LE_APIP_Large_PerCumIntake	BA_LE_APIP_Large_PerCumIntake	515	44.1552	52.481	43.5156	41.059	40.1662	39.9758	46.5092	39.4429	68.9486	33.6242	38.9653	48.5279	85.9419	45.573	42.3294	57.6631	44.219	56.6281	0.947552	0.942419	0.22213	0.042159	0.22213	-0.249211	375
BA_LE_APIP_Large_Dur_ms	BA_LE_APIP_Large_Dur_ms	516	10.2413	7.83165	6.67473	12.986	12.0506	10.9204	8.8328	10.2248	11.3551	8.88561	6.54899	7.13742	6.49026	8.2448	8.21567	8.04879	8.82359	9.14371	0.005206	0.035435	0.009489	0.008148	0.009489	0.387004	421
BA_LE_APIP_Large_Size_mg	BA_LE_APIP_Large_Size_mg	517	2.83992	2.18779	1.88886	3.18698	3.99791	3.15767	3.31692	1.9041	2.80216	2.46475	1.87426	1.85066	1.94987	1.68484	1.95911	2.06325	2.26435	3.85595	0.041492	0.122681	0.088195	0.021934	0.088195	0.376377	293
BA_LE_APIP_Large_MeanIntensity_mgs	BA_LE_APIP_Large_MeanIntensity_mgs	518	9.0405	6.9277	6.08109	12.0992	10.0685	8.90072	7.20354	9.85107	10.5335	7.58629	6.10394	6.62141	5.60739	7.82456	7.78414	7.06767	7.59046	6.82203	0.024942	0.088576	0.014431	0.008972	0.014431	0.384026	303
BA_LE_APIP_Large_RatioIntensity_mgs	BA_LE_APIP_Large_RatioIntensity_mgs	519	4.82585	2.82609	4.37238	7.45247	6.66343	1.94401	1.37826	6.95113	6.68346	3.16171	2.80712	4.14729	2.62363	3.07392	1.77103	3.5678	3.03131	1.58659	0.052448	0.147721	0.045561	0.015598	0.045561	0.771979	389
BA_LE_APIP_AP_BoutThresh_mg	BA_LE_APIP_AP_BoutThresh_mg	520	18.1595	21.2749	10.6295	20.7035	21.9971	23.3714	19.486	21.9971	13.5456	13.5456	8.34124	6.16065	26.3832	24.8317	29.783	24.8317	16.2465	33.621	0.882751	0.956593	0.44024	0.069325	0.44024	-0.228429	827
BA_LE_APIP_IP_BoutThresh_mg	BA_LE_APIP_IP_BoutThresh_mg	521	16.497	43.0699	15.2911	28.0316	6.95453	28.0316	20.7035	19.486	8.34124	5.13646	45.5214	10	53.5062	100.089	65.4848	21.9971	17.2616	30.6994	0.989666	0.839855	0.030262	0.011609	0.030262	-1.38448	838
BA_LE_APIP_Small_MeanTotalBoutDur_ms	BA_LE_APIP_Small_MeanTotalBoutDur_ms	522	3177.49	4727.87	3147.67	1419.8	4164.33	2585.33	8569	1861.4	527.133	3145.27	563	58.4	6215.53	7543.87	10673.6	4966.92	7144.4	657.2	0.747319	0.907675	0.358547	0.05931	0.358547	-0.573301	810
BA_LE_APIP_Small_MeanTotalBoutIntake_mg	BA_LE_APIP_Small_MeanTotalBoutIntake_mg	523	26.2833	31.455	8.20086	17.6405	56.231	20.9896	60.6269	21.2634	4.37828	20.9356	7.14045	1.48494	33.3353	51.5815	61.7378	37.5936	49.8303	8.93613	0.639549	0.842556	0.644539	0.089395	0.644539	-0.259145	547
BA_LE_APIP_Small_BoutNumber	BA_LE_APIP_Small_BoutNumber	524	4.775	3.68654	2.2	3.4	6.46667	4.8	12.4667	2.8	1.46667	4.6	2.2	0.6	3.6	4.46667	5.8	4.69231	7.46667	0.666667	0.322688	0.560792	0.481142	0.073106	0.481142	0.373234	644
BA_LE_APIP_Small_BoutProbability	BA_LE_APIP_Small_BoutProbability	525	0.11383	0.102284	0.057692	0.108511	0.129506	0.115016	0.278689	0.072414	0.059783	0.089032	0.073333	0.017442	0.145553	0.149554	0.178279	0.113383	0.115345	0.025381	0.639549	0.840861	0.729487	0.09731	0.729487	0.15431	630
BA_LE_APIP_Small_BoutPerCumIntake	BA_LE_APIP_Small_BoutPerCumIntake	526	0.705569	0.745682	0.226543	0.497382	1.46181	0.501343	1.61242	0.601795	0.126297	0.616962	0.184032	0.034587	0.857683	1.12623	1.52314	0.885357	1.13251	0.221924	0.560761	0.794847	0.88411	0.111475	0.88411	-0.079775	670
BA_LE_APIP_Small_BoutMeanDur_ms	BA_LE_APIP_Small_BoutMeanDur_ms	527	678.278	1076.27	1430.76	417.588	643.969	538.611	687.353	664.786	359.409	683.754	255.909	97.3333	1726.54	1688.93	1840.28	1058.52	956.839	985.8	0.919736	0.960053	0.148473	0.03131	0.148473	-0.666088	528
BA_LE_APIP_Small_BoutMeanSize_mg	BA_LE_APIP_Small_BoutMeanSize_mg	528	43.6287	25.5205	23.2727	53.7449	52.1928	61.5997	35.1501	27.8596	70.1206	25.089	31.2824	45.7337	19.0651	26.0736	26.6723	16.0706	21.959	17.3073	0.014064	0.068581	0.025374	0.010765	0.025374	0.77362	537
BA_LE_APIP_Small_BoutMeanIntensity_mgs	BA_LE_APIP_Small_BoutMeanIntensity_mgs	529	3177.49	4727.87	3147.67	1419.8	4164.33	2585.33	8569	1861.4	527.133	3145.27	563	58.4	6215.53	7543.87	10673.6	4966.92	7144.4	657.2	0.747319	0.905991	0.358547	0.059219	0.358547	-0.573301	365
BA_LE_APIP_Small_BoutRatioIntensity_mgs	BA_LE_APIP_Small_BoutRatioIntensity_mgs	530	4.775	3.68654	2.2	3.4	6.46667	4.8	12.4667	2.8	1.46667	4.6	2.2	0.6	3.6	4.46667	5.8	4.69231	7.46667	0.666667	0.322688	0.559305	0.481142	0.073003	0.481142	0.373234	70
BA_LE_APIP_Small_BoutSlopeIntensity_mgs	BA_LE_APIP_Small_BoutSlopeIntensity_mgs	531	0.11383	0.102284	0.057692	0.108511	0.129506	0.115016	0.278689	0.072414	0.059783	0.089032	0.073333	0.017442	0.145553	0.149554	0.178279	0.113383	0.115345	0.025381	0.639549	0.839172	0.729487	0.09719	0.729487	0.15431	136
BA_LE_APIP_Small_AP_MeanTotalBoutDur_ms	BA_LE_APIP_Small_AP_MeanTotalBoutDur_ms	532	0.705569	0.745682	0.226543	0.497382	1.46181	0.501343	1.61242	0.601795	0.126297	0.616962	0.184032	0.034587	0.857683	1.12623	1.52314	0.885357	1.13251	0.221924	0.560761	0.793127	0.88411	0.111345	0.88411	-0.079775	50
BA_LE_APIP_Small_AP_MeanTotalBoutIntake_mg	BA_LE_APIP_Small_AP_MeanTotalBoutIntake_mg	533	678.278	1076.27	1430.76	417.588	643.969	538.611	687.353	664.786	359.409	683.754	255.909	97.3333	1726.54	1688.93	1840.28	1058.52	956.839	985.8	0.919736	0.958522	0.148473	0.03125	0.148473	-0.666088	116
BA_LE_APIP_Small_AP_BoutNumber	BA_LE_APIP_Small_AP_BoutNumber	534	1965.61	1881.85	6347.03	637.545	1073.97	1214.58	2444.05	1070.87	1175.49	1761.3	450.512	101.167	3257.86	3501.52	3600.86	1415.16	1831.58	896.104	0.560761	0.791414	0.920346	0.114181	0.920346	0.062825	126
BA_LE_APIP_Small_AP_BoutProbability	BA_LE_APIP_Small_AP_BoutProbability	535	5.24725	8.15782	3.72766	5.18838	8.69552	4.37283	4.86312	7.59407	2.98519	4.55121	3.24566	2.47491	9.2598	11.5481	10.6444	8.01175	6.6737	13.4042	0.93481	0.952953	0.078103	0.020508	0.078103	-0.636623	60
BA_LE_APIP_Small_AP_BoutPerCumIntake	BA_LE_APIP_Small_AP_BoutPerCumIntake	536	4.13268	8.10335	2.58947	3.82476	7.27933	4.74231	3.768	5.92386	1.67324	3.26045	2.73998	0.963682	8.74271	20.5885	10.563	5.91309	4.53638	10.7794	0.919736	0.956995	0.102729	0.024212	0.102729	-0.971441	188
BA_LE_APIP_Small_AP_BoutMeanDur_ms	BA_LE_APIP_Small_AP_BoutMeanDur_ms	537	43.6287	25.5205	23.2727	53.7449	52.1928	61.5997	35.1501	27.8596	70.1206	25.089	31.2824	45.7337	19.0651	26.0736	26.6723	16.0706	21.959	17.3073	0.014064	0.068073	0.025374	0.010723	0.025374	0.77362	204
BA_LE_APIP_Small_AP_BoutMeanSize_mg	BA_LE_APIP_Small_AP_BoutMeanSize_mg	538	8.76403	10.5295	2.60538	12.4246	13.503	8.11871	7.07514	11.4233	8.30583	6.65622	12.6829	25.4271	5.36322	6.83754	5.78416	7.56879	6.97474	13.5973	0.520435	0.759093	0.52418	0.076322	0.52418	-0.264765	172
BA_LE_APIP_Small_AP_BoutMeanIntensity_mgs	BA_LE_APIP_Small_AP_BoutMeanIntensity_mgs	539	2838.68	3509.37	2879.87	1031.47	3974.6	1627.27	7802.6	1735	525.333	3133.33	283	58.4	4842.27	3077	8713.6	4256.92	6385.13	458.6	0.600777	0.823003	0.634766	0.088493	0.634766	-0.305988	156
BA_LE_APIP_Small_AP_BoutRatioIntensity_mgs	BA_LE_APIP_Small_AP_BoutRatioIntensity_mgs	540	4.26667	3.18333	2	2.93333	5.73333	3.73333	11.4667	2.6	1.4	4.26667	1.93333	0.6	3.33333	3.8	5.06667	4	6.26667	0.466667	0.360451	0.60085	0.4354	0.068965	0.4354	0.422571	7
BA_LE_APIP_Small_AP_BoutSlopeIntensity_mgs	BA_LE_APIP_Small_AP_BoutSlopeIntensity_mgs	541	0.111157	0.097777	0.057361	0.104513	0.122507	0.097391	0.276083	0.078313	0.06087	0.092219	0.06988	0.01978	0.146199	0.138686	0.167033	0.113786	0.107675	0.019178	0.639549	0.83749	0.680322	0.092811	0.680322	0.185035	148
BA_LE_APIP_Small_IP_MeanTotalBoutDur_ms	BA_LE_APIP_Small_IP_MeanTotalBoutDur_ms	542	0.702258	0.607806	0.216997	0.438052	1.47528	0.409575	1.58971	0.6774	0.132652	0.678391	0.147039	0.038567	0.776894	0.511965	1.27293	0.861125	1.08367	0.170258	0.439239	0.680134	0.715093	0.09658	0.715093	0.208391	8
BA_LE_APIP_Small_IP_MeanTotalBoutIntake_mg	BA_LE_APIP_Small_IP_MeanTotalBoutIntake_mg	543	672.259	911.471	1439.93	351.636	693.244	435.875	680.459	667.308	375.238	734.375	146.379	97.3333	1452.68	809.737	1719.79	1064.23	1018.9	982.714	0.902564	0.965258	0.325438	0.055973	0.325438	-0.43918	164
BA_LE_APIP_Small_IP_BoutNumber	BA_LE_APIP_Small_IP_BoutNumber	544	1995.15	1597.2	6646.19	571.567	1124.07	984.829	2500.64	1111.77	1202.11	1820.01	130.758	101.167	2703.48	1896.2	3675.76	1487.22	1960.17	822.879	0.520435	0.757402	0.636057	0.088446	0.636057	0.320948	196
BA_LE_APIP_Small_IP_BoutProbability	BA_LE_APIP_Small_IP_BoutProbability	545	5.31041	7.14556	3.60699	4.83286	9.47501	4.32631	4.88967	7.52309	3.03225	4.79709	2.74243	2.47491	8.27849	5.62782	9.58895	7.75616	6.83377	13.862	0.860684	0.953231	0.24543	0.04531	0.24543	-0.428225	458
BA_LE_APIP_Small_IP_BoutPerCumIntake	BA_LE_APIP_Small_IP_BoutPerCumIntake	546	4.07386	5.45971	2.32027	3.27511	7.36872	4.77035	3.75428	6.14318	1.69958	3.25937	1.38275	0.963682	6.91506	5.0218	8.40248	5.81676	4.33941	10.8357	0.808858	0.93547	0.326052	0.055989	0.326052	-0.422429	105
BA_LE_APIP_Small_IP_BoutMeanDur_ms	BA_LE_APIP_Small_IP_BoutMeanDur_ms	547	42.6191	26.2185	24.2769	57.0462	46.6421	56.7155	33.9868	28.9175	69.9377	23.4299	33.9961	45.7337	19.9884	28.408	27.5855	16.1798	19.8862	17.9701	0.018959	0.077915	0.036909	0.013399	0.036909	0.700916	39
BA_LE_APIP_Small_IP_BoutStdDur_ms	BA_LE_APIP_Small_IP_BoutStdDur_ms	548	42.984	23.8494	21.2661	61.4991	60.8152	53.7858	36.7146	24.4228	62.5823	22.786	28.2609	30.2834	24.5712	31.2302	33.6511	13.4287	19.2339	10.1361	0.041492	0.122128	0.019626	0.009875	0.019626	0.849844	15
BA_LE_APIP_Small_IP_BoutStdSize_mg	BA_LE_APIP_Small_IP_BoutStdSize_mg	549	1.79861	4.66452	0.150024	3.75108	2.57051	3.94414	0.473553	2.21771	0.764814	0.517059	10.2269	6.49488	1.03401	1.65883	0.930243	2.89858	0.931689	13.141	0.93481	0.951469	0.127995	0.028202	0.127995	-1.37485	81
BA_LE_APIP_Small_IP_BoutStdIntensity_mgs	BA_LE_APIP_Small_IP_BoutStdIntensity_mgs	550	2.25747		0.986879	3.46409	1.90763	4.83801	4.55864	1.70337	0.133129	0.467999	1.83841		5.7403	30.1958	13.1538	6.56896	7.00537	2.46721			0.058333	0.017289	0.058333		93
BA_LE_APIP_Small_IP_BoutSlopeIntensity_mgs	BA_LE_APIP_Small_IP_BoutSlopeIntensity_mgs	551	0.150768	0.156757	0.061224	0.142857	0.234043	0.313725	0.3125	0.036585	0.043478	0.061728	0.114286	0	0.137931	0.27027	0.333333	0.111111	0.183673	0.103448	0.639549	0.835815	0.916594	0.113977	0.916594	-0.056199	27
BA_LE_APIP_Small_TotalDur_ms	BA_LE_APIP_Small_TotalDur_ms	552	0.874193	2.38888	0.333925	1.11591	1.16017	1.98948	1.95595	0.263754	0.049964	0.124383	0.670612	0	1.71503	7.49621	5.55892	1.02105	1.56318	1.08604	0.808858	0.933818	0.145107	0.030902	0.145107	-1.45031	59
BA_LE_APIP_Small_TotalIntake_mg	BA_LE_APIP_Small_TotalIntake_mg	553	598.657		1339	832.143	258.727	898.188	766.4	632	27	35.8	1050		5149.75	6700.3	2672.73	1025.56	632.722	993			0.037012	0.013347	0.037012		125
BA_LE_APIP_Small_Number	BA_LE_APIP_Small_Number	554	874.53		2012.68	901.959	385.388	1802.51	1724.89	149.292	0	19.5243	1024.01		7159.38	5893.98	3050.04	958.26	867.241	1257.78			0.060142	0.017585	0.060142		115
BA_LE_APIP_Small_Probability	BA_LE_APIP_Small_Probability	555	4.49635		4.9344	7.42306	2.60131	4.53563	4.55864	8.51684	1.99693	1.404	6.89403		21.5261	45.2937	17.937	9.4885	5.83781	12.3361			0.023987	0.010464	0.023987		49
BA_LE_APIP_Small_PerCumIntake	BA_LE_APIP_Small_PerCumIntake	556	2.80716		5.17878	6.18721	1.03887	4.79318	4.04532	0.989142	0	0.224794	6.48376		18.7792	38.2664	19.0548	6.60762	5.52016	12.969			0.010192	0.00799	0.010192		853
BA_LE_APIP_Small_Dur_ms	BA_LE_APIP_Small_Dur_ms	557	50.4238		13.2306	32.9945	95.5892	78.6945	48.4891	14.107	73.9603	46.3255	11.6079		7.52475	12.7675	20.3631	15.4395	32.7835	15.7608			0.013584	0.008644	0.013584		852
BA_LE_APIP_Small_Size_mg	BA_LE_APIP_Small_Size_mg	558	52.6333		13.3985	40.5868	175.582	111.187	56.6838	4.12382	0	19.5041	8.46262		3.57706	17.2657	20.2206	11.9342	31.0887	4.29593			0.124223	0.027881	0.124223		797
BA_LE_APIP_Small_MeanIntensity_mgs	BA_LE_APIP_Small_MeanIntensity_mgs	559	20.039		3.68514	8.92041	10.0543	5.04976	5.94812	13.476	73.9603	39.2178	6.56574		4.18003	6.75994	6.71111	9.25206	9.22649	12.423			0.217445	0.041857	0.217445		755
BA_LE_APIP_Small_RatioIntensity_mgs	BA_LE_APIP_Small_RatioIntensity_mgs	560			2.56896	5.93269	2.40306	2.19354	1.88536	-1.94426		-1.13082	5.30259		2.41818	5.64969	4.88124	5.60627	5.44339	10.2984			0.011286	0.008194	0.011286		744
BA_LE_DCLC_Large_MeanTotalBoutDur_ms	BA_LE_DCLC_Large_MeanTotalBoutDur_ms	561	381599	485631	592000	278000	367661	358875	398765	327537	305081	424877	506827	525742	552063	517504	452121	510743	446068	373981	0.992618	0.822076	0.02114	0.010031	0.02114	-0.347802	786
BA_LE_DCLC_Large_MeanTotalBoutIntake_mg	BA_LE_DCLC_Large_MeanTotalBoutIntake_mg	562	3642.88	4139.31	3611.8	3529.03	3790.44	4165.68	3699.37	3512.07	3462.29	3372.4	3872.86	4291.85	3853.33	4528.42	3991.6	4208.56	4350.17	4017.73	0.999456	0.760286	0.001233	0.008338	0.001233	-0.184311	836
BA_LE_DCLC_Large_BoutRate_onperms	BA_LE_DCLC_Large_BoutRate_onperms	563	0	0	0	0	1e-06	0	0	0	0	1e-06	0	0	0	0	0	0	1e-06	0	0.139316	0.293661	0.484662	0.07252	0.484662	0.150455	825
BA_LE_DCLC_Large_BoutRate_onperactms	BA_LE_DCLC_Large_BoutRate_onperactms	564	1e-06	2e-06	2e-06	1e-06	2e-06	1e-06	2e-06	1e-06	1e-06	2e-06	2e-06	2e-06	1e-06	2e-06	1e-06	2e-06	2e-06	1e-06	0.713131	0.890993	0.512839	0.075177	0.512839	-0.118362	807
BA_LE_DCLC_Large_BoutNumber	BA_LE_DCLC_Large_BoutNumber	565	35.3167	31.8032	35.9333	27.9333	43.4667	36.9333	32.2667	35.8667	23.0667	47.0667	27.8	33.8	21.1333	25.4	26.7333	36.6923	57.2667	25.6	0.117249	0.263284	0.483291	0.072617	0.483291	0.151177	765
BA_LE_DCLC_Large_BoutProbability	BA_LE_DCLC_Large_BoutProbability	566	0.88617	0.897716	0.942308	0.891489	0.870494	0.884984	0.721311	0.927586	0.940217	0.910968	0.926667	0.982558	0.854447	0.850446	0.821721	0.886617	0.884655	0.974619	0.399223	0.637821	0.729487	0.097671	0.729487	-0.018677	767
BA_LE_DCLC_Large_BoutPerCumIntake	BA_LE_DCLC_Large_BoutPerCumIntake	567	99.2944	99.2543	99.7735	99.5026	98.5382	99.4987	98.3876	99.3982	99.8737	99.383	99.816	99.9654	99.1423	98.8738	98.4769	99.1146	98.8675	99.7781	0.479565	0.720385	0.88411	0.112129	0.88411	0.000583	809
BA_LE_DCLC_Large_BoutMeanDur_ms	BA_LE_DCLC_Large_BoutMeanDur_ms	568	11043.3	16689.1	16474.9	9952.25	8458.45	9716.84	12358.4	9132.06	13226.1	9027.14	18231.2	15554.5	26122.8	20374.2	16912.3	13919.6	7789.31	14608.7	0.989666	0.838766	0.018386	0.009703	0.018386	-0.595736	848
BA_LE_DCLC_Large_BoutMeanSize_mg	BA_LE_DCLC_Large_BoutMeanSize_mg	569	107.646	140.478	100.514	126.337	87.2033	112.789	114.65	97.9202	150.099	71.6515	139.311	126.978	182.334	178.284	149.312	114.699	75.9634	156.943	0.985936	0.860148	0.046255	0.015736	0.046255	-0.384055	846
BA_LE_DCLC_Large_BoutMeanIntensity_mgs	BA_LE_DCLC_Large_BoutMeanIntensity_mgs	570	11.0593	9.23232	7.27212	13.1088	12.8167	12.5517	10.2974	11.4175	12.0558	8.95456	8.17911	8.75172	7.52797	8.95036	9.46936	8.95488	10.5758	11.4494	0.041492	0.121581	0.051313	0.016279	0.051313	0.260499	701
BA_LE_DCLC_Large_BoutRatioIntensity_mgs	BA_LE_DCLC_Large_BoutRatioIntensity_mgs	571	9.9998	8.6374	6.10101	12.6944	10.3096	11.6076	9.27707	10.7227	11.3487	7.93735	7.64138	8.1634	6.97988	8.75051	8.82859	8.24007	9.75226	10.7431	0.080264	0.20095	0.138473	0.029664	0.138473	0.211302	734
BA_LE_DCLC_Large_BoutSlopeIntensity_mgs	BA_LE_DCLC_Large_BoutSlopeIntensity_mgs	572	5.68046	4.91729	3.31463	8.40048	5.96038	5.1977	4.26723	6.87003	7.06025	4.37294	4.14173	4.42606	4.3861	6.17442	6.06791	4.66948	5.10766	4.36499	0.252681	0.457374	0.270364	0.048107	0.270364	0.208142	698
BA_LE_DCLC_Large_BoutMeanSize_evtnum	BA_LE_DCLC_Large_BoutMeanSize_evtnum	573	62.4333	85.0038	69.859	61.747	46.0567	61.4874	73.0041	59.2639	76.9191	51.1289	89.6067	73.497	109.767	115.585	88.5387	75.9686	47.5495	79.5182	0.994794	0.808506	0.018437	0.009635	0.018437	-0.445213	72
BA_LE_DCLC_Large_BoutMeanSize_evtdur	BA_LE_DCLC_Large_BoutMeanSize_evtdur	574	1965.12	3045.23	2402.47	1833.65	1317.72	1979.15	2387.95	1896.38	2133.73	1769.94	3322.25	2680.38	4149.08	3894.24	3134.54	2837.94	1696.72	2646.7	0.997669	0.777018	0.002928	0.006091	0.002928	-0.631931	138
BA_LE_DCLC_Large_DC_MeanTotalBoutDur_ms	BA_LE_DCLC_Large_DC_MeanTotalBoutDur_ms	575	340139	427284	535847	248414	349084	329723	357427	254771	275878	369966	457156	449745	487667	468636	416697	417451	383397	337521	0.989666	0.837679	0.033418	0.012597	0.033418	-0.329071	784
BA_LE_DCLC_Large_DC_MeanTotalBoutIntake_mg	BA_LE_DCLC_Large_DC_MeanTotalBoutIntake_mg	576	3278.78	3727.43	3264.11	3174.55	3603.88	3898.56	3389.73	2794.92	3148.99	2955.5	3565.02	3765.3	3480.93	4144.12	3703.54	3543.59	3866.07	3750.87	0.992618	0.821035	0.008083	0.007807	0.008083	-0.185023	795
BA_LE_DCLC_Large_DC_BoutRate_onperms	BA_LE_DCLC_Large_DC_BoutRate_onperms	577	1e-06	1e-06	1e-06	1e-06	1e-06	1e-06	1e-06	1e-06	0	1e-06	1e-06	1e-06	0	1e-06	1e-06	1e-06	1e-06	1e-06	0.117249	0.262382	0.473367	0.072433	0.473367	0.152265	791
BA_LE_DCLC_Large_DC_BoutRate_onperactms	BA_LE_DCLC_Large_DC_BoutRate_onperactms	578	2e-06	2e-06	2e-06	1e-06	2e-06	1e-06	2e-06	1e-06	1e-06	2e-06	2e-06	2e-06	1e-06	2e-06	1e-06	2e-06	3e-06	1e-06	0.808858	0.932171	0.484055	0.07253	0.484055	-0.128463	802
BA_LE_DCLC_Large_DC_BoutNumber	BA_LE_DCLC_Large_DC_BoutNumber	579	31.725	28.5474	32.3333	24.6667	40.8	34.2667	29.3333	29.9333	21.2	41.2667	25.5333	29.1333	19.2667	23.5333	24.9333	30.8462	51.5333	23.6	0.117249	0.261487	0.47343	0.07234	0.47343	0.152259	776
BA_LE_DCLC_Large_DC_BoutProbability	BA_LE_DCLC_Large_DC_BoutProbability	580	0.888725	0.902762	0.94358	0.89372	0.876791	0.90493	0.723684	0.920082	0.938053	0.908957	0.929612	0.979821	0.852507	0.863081	0.836689	0.887168	0.89261	0.980609	0.399223	0.636265	0.663992	0.091274	0.663992	-0.022609	752
BA_LE_DCLC_Large_DC_BoutPerCumIntake	BA_LE_DCLC_Large_DC_BoutPerCumIntake	581	99.2968	99.3937	99.785	99.5554	98.515	99.6234	98.4036	99.305	99.8654	99.3215	99.8515	99.9606	99.2135	99.5004	98.7221	99.1576	98.916	99.8278	0.600777	0.821281	0.70976	0.096221	0.70976	-0.001407	741
BA_LE_DCLC_Large_DC_BoutMeanDur_ms	BA_LE_DCLC_Large_DC_BoutMeanDur_ms	582	10937	16319.3	16572.6	10070.8	8555.98	9622.27	12185	8511.3	13013.1	8965.26	17904.3	15437.5	25311.5	19913.7	16712.4	13533.3	7439.79	14301.8	0.989666	0.836595	0.021751	0.010186	0.021751	-0.577354	774
BA_LE_DCLC_Large_DC_BoutMeanSize_mg	BA_LE_DCLC_Large_DC_BoutMeanSize_mg	583	107.605	140.376	100.952	128.698	88.3304	113.771	115.559	93.3715	148.537	71.6194	139.622	129.244	180.671	176.096	148.538	114.88	75.0207	158.935	0.985936	0.859002	0.045593	0.01556	0.045593	-0.383551	764
BA_LE_DCLC_Large_DC_BoutMeanIntensity_mgs	BA_LE_DCLC_Large_DC_BoutMeanIntensity_mgs	584	11.1444	9.36571	7.32008	13.1418	12.8786	12.6683	10.4493	11.6474	12.1	8.94935	8.31858	8.96253	7.61697	9.00312	9.53815	9.11096	10.7638	11.6116	0.052448	0.147087	0.05904	0.017404	0.05904	0.250855	822
BA_LE_DCLC_Large_DC_BoutRatioIntensity_mgs	BA_LE_DCLC_Large_DC_BoutRatioIntensity_mgs	585	10.1094	8.84055	6.09149	12.7792	10.3238	11.8237	9.4837	10.9703	11.4144	7.98855	7.79824	8.37209	7.13792	8.84293	8.88785	8.48865	10.0837	11.113	0.080264	0.200183	0.177115	0.035418	0.177115	0.193491	833
BA_LE_DCLC_Large_DC_BoutSlopeIntensity_mgs	BA_LE_DCLC_Large_DC_BoutSlopeIntensity_mgs	586	5.88798	5.53555	3.24914	8.54917	5.90823	6.09436	4.81029	6.83035	7.05323	4.60906	4.38585	4.51982	4.98717	6.61974	6.22315	5.18232	6.21364	6.15273	0.360451	0.599321	0.601775	0.084768	0.601775	0.089045	772
BA_LE_DCLC_Large_DC_BoutMeanSize_evtnum	BA_LE_DCLC_Large_DC_BoutMeanSize_evtnum	587	62.4314	84.8625	70.1381	63.1081	46.6699	62.035	73.8091	56.5056	76.0755	51.1099	89.8381	74.6339	108.599	114.198	88.0508	76.005	47.053	80.5226	0.994794	0.807502	0.017406	0.009807	0.017406	-0.442856	847
BA_LE_DCLC_Large_DC_BoutMeanSize_evtdur	BA_LE_DCLC_Large_DC_BoutMeanSize_evtdur	588	1960.24	3031.93	2408.92	1872.82	1334.07	1992.46	2420.18	1789.08	2096.58	1767.82	3316.01	2708.7	4109.93	3840.07	3109.23	2814.27	1674.84	2682.39	0.997669	0.776093	0.002802	0.00645	0.002802	-0.629207	766
BA_LE_DCLC_Large_LC_MeanTotalBoutDur_ms	BA_LE_DCLC_Large_LC_MeanTotalBoutDur_ms	589	41460.5	58347.4	56152.9	29585.3	18576.5	29152.2	41338.3	72765.1	29203.1	54910.9	49671.1	75997.8	64395.3	48867.3	35424.5	93292.8	62670.5	36460.1	0.958508	0.925153	0.098599	0.023443	0.098599	-0.49293	808
BA_LE_DCLC_Large_LC_MeanTotalBoutIntake_mg	BA_LE_DCLC_Large_LC_MeanTotalBoutIntake_mg	590	364.105	411.885	347.692	354.481	186.554	267.119	309.643	717.15	313.299	416.902	307.844	526.547	372.4	384.299	288.058	664.968	484.103	266.861	0.747319	0.904313	0.528624	0.076557	0.528624	-0.177887	830
BA_LE_DCLC_Large_LC_BoutRate_onperms	BA_LE_DCLC_Large_LC_BoutRate_onperms	591	0	0	0	0	0	0	0	0	0	0	0	0	0	0	0	0	0	0	0.139316	0.292717	0.698038	0.094988	0.698038	0.140485	841
BA_LE_DCLC_Large_LC_BoutRate_onperactms	BA_LE_DCLC_Large_LC_BoutRate_onperactms	592	1e-06	1e-06	1e-06	1e-06	1e-06	1e-06	1e-06	1e-06	1e-06	2e-06	1e-06	2e-06	1e-06	1e-06	1e-06	2e-06	2e-06	1e-06	0.560761	0.789708	0.910274	0.113321	0.910274	-0.026548	18
BA_LE_DCLC_Large_LC_BoutNumber	BA_LE_DCLC_Large_LC_BoutNumber	593	3.59167	3.25577	3.6	3.26667	2.66667	2.66667	2.93333	5.93333	1.86667	5.8	2.26667	4.66667	1.86667	1.86667	1.8	5.84615	5.73333	2	0.164103	0.329943	0.69324	0.094454	0.69324	0.141655	84
BA_LE_DCLC_Large_LC_BoutProbability	BA_LE_DCLC_Large_LC_BoutProbability	594	0.854607	0.84476	0.931034	0.875	0.784314	0.689655	0.698413	0.967391	0.965517	0.925532	0.894737	1	0.875	0.717949	0.658537	0.883721	0.819048	0.909091	0.360451	0.5978	0.863641	0.110701	0.863641	0.016719	96
BA_LE_DCLC_Large_LC_BoutPerCumIntake	BA_LE_DCLC_Large_LC_BoutPerCumIntake	595	99.1441	97.7945	99.6652	99.0322	98.9878	97.7131	98.2122	99.763	99.9575	99.8214	99.4064	100	98.482	92.5864	95.4295	98.8863	98.4817	99.0839	0.164103	0.32893	0.169904	0.034615	0.169904	0.019773	30
BA_LE_DCLC_Large_LC_BoutMeanDur_ms	BA_LE_DCLC_Large_LC_BoutMeanDur_ms	596	11752.7	20459.3	15598	9056.71	6966.18	10932.1	14092.6	12263.8	15644.5	9467.4	21913.7	16285.2	34497.5	26178.9	19680.3	15958	10930.9	18230	0.999068	0.767135	0.007613	0.007487	0.007613	-0.79977	343
BA_LE_DCLC_Large_LC_BoutMeanSize_mg	BA_LE_DCLC_Large_LC_BoutMeanSize_mg	597	105.171	143.208	96.5812	108.515	69.9578	100.17	105.56	120.868	167.839	71.8797	135.814	112.832	199.5	205.874	160.032	113.745	84.4366	133.431	0.981041	0.885432	0.06032	0.017401	0.06032	-0.445371	448
BA_LE_DCLC_Large_LC_BoutMeanIntensity_mgs	BA_LE_DCLC_Large_LC_BoutMeanIntensity_mgs	598	10.2756	8.00097	6.84142	12.8597	11.8692	11.0536	8.77792	10.2578	11.5535	8.99167	6.60806	7.43564	6.60945	8.28523	8.51653	8.13133	8.88621	9.53532	0.007382	0.043454	0.012019	0.008443	0.012019	0.360976	333
BA_LE_DCLC_Large_LC_BoutRatioIntensity_mgs	BA_LE_DCLC_Large_LC_BoutRatioIntensity_mgs	599	9.13072	7.13456	6.19189	11.9817	10.0425	9.16291	7.49046	9.85569	10.7283	7.59234	6.19765	6.92845	5.78304	7.86413	8.13159	7.12775	7.72458	7.31927	0.024942	0.088097	0.016928	0.009638	0.016928	0.355904	474
BA_LE_DCLC_Large_LC_BoutSlopeIntensity_mgs	BA_LE_DCLC_Large_LC_BoutSlopeIntensity_mgs	600	4.94135	2.91441	4.40231	7.0665	6.98733	2.06854	1.81869	6.78708	7.07341	3.32696	2.87557	4.21104	2.57412	3.09944	2.37455	3.5877	3.10332	1.48953	0.052448	0.146459	0.034949	0.012948	0.034949	0.761703	434
BA_LE_DCLC_Large_LC_BoutMeanSize_evtnum	BA_LE_DCLC_Large_LC_BoutMeanSize_evtnum	601	60.7306	87.3805	67.3519	51.4694	36.675	54.45	64.9545	73.1798	86.5	51.2644	87	66.4	121.821	133.071	95.2963	75.7763	52.0116	67.6667	0.989666	0.835515	0.034212	0.012807	0.034212	-0.524887	412
BA_LE_DCLC_Large_LC_BoutMeanSize_evtdur	BA_LE_DCLC_Large_LC_BoutMeanSize_evtdur	602	1950.27	3199.14	2344.52	1537.92	1067.65	1808.15	2065.59	2437.71	2555.64	1785	3392.56	2503.57	4553.14	4577.07	3485.11	2962.79	1893.31	2225.6	0.996503	0.799946	0.007119	0.007198	0.007119	-0.714011	317
BA_LE_DCLC_Large_TotalDur_ms	BA_LE_DCLC_Large_TotalDur_ms	603	381599	485631	592000	278000	367661	358875	398765	327537	305081	424877	506827	525742	552063	517504	452121	510743	446068	373981	0.992618	0.819997	0.02114	0.009987	0.02114	-0.347802	452
BA_LE_DCLC_Large_TotalIntake_mg	BA_LE_DCLC_Large_TotalIntake_mg	604	3642.88	4139.31	3611.8	3529.03	3790.44	4165.68	3699.37	3512.07	3462.29	3372.4	3872.86	4291.85	3853.33	4528.42	3991.6	4208.56	4350.17	4017.73	0.999456	0.759402	0.001233	0.007847	0.001233	-0.184311	347
BA_LE_DCLC_Large_Number	BA_LE_DCLC_Large_Number	605	35.3167	31.8032	35.9333	27.9333	43.4667	36.9333	32.2667	35.8667	23.0667	47.0667	27.8	33.8	21.1333	25.4	26.7333	36.6923	57.2667	25.6	0.117249	0.260597	0.483291	0.072516	0.483291	0.151177	337
BA_LE_DCLC_Large_Probability	BA_LE_DCLC_Large_Probability	606	0.88617	0.897716	0.942308	0.891489	0.870494	0.884984	0.721311	0.927586	0.940217	0.910968	0.926667	0.982558	0.854447	0.850446	0.821721	0.886617	0.884655	0.974619	0.399223	0.634717	0.729487	0.09755	0.729487	-0.018677	438
BA_LE_DCLC_Large_PerCumIntake	BA_LE_DCLC_Large_PerCumIntake	607	99.2944	99.2543	99.7735	99.5026	98.5382	99.4987	98.3876	99.3982	99.8737	99.383	99.816	99.9654	99.1423	98.8738	98.4769	99.1146	98.8675	99.7781	0.479565	0.718732	0.88411	0.111997	0.88411	0.000583	466
BA_LE_DCLC_Large_Dur_ms	BA_LE_DCLC_Large_Dur_ms	608	11043.3	16689.1	16474.9	9952.25	8458.45	9716.84	12358.4	9132.06	13226.1	9027.14	18231.2	15554.5	26122.8	20374.2	16912.3	13919.6	7789.31	14608.7	0.989666	0.834436	0.018386	0.009656	0.018386	-0.595736	357
BA_LE_DCLC_Large_Size_mg	BA_LE_DCLC_Large_Size_mg	609	107.646	140.478	100.514	126.337	87.2033	112.789	114.65	97.9202	150.099	71.6515	139.311	126.978	182.334	178.284	149.312	114.699	75.9634	156.943	0.985936	0.857858	0.046255	0.015687	0.046255	-0.384055	503
BA_LE_DCLC_Large_MeanIntensity_mgs	BA_LE_DCLC_Large_MeanIntensity_mgs	610	11.0593	9.23232	7.27212	13.1088	12.8167	12.5517	10.2974	11.4175	12.0558	8.95456	8.17911	8.75172	7.52797	8.95036	9.46936	8.95488	10.5758	11.4494	0.041492	0.121038	0.051313	0.016232	0.051313	0.260499	493
BA_LE_DCLC_Large_RatioIntensity_mgs	BA_LE_DCLC_Large_RatioIntensity_mgs	611	9.9998	8.6374	6.10101	12.6944	10.3096	11.6076	9.27707	10.7227	11.3487	7.93735	7.64138	8.1634	6.97988	8.75051	8.82859	8.24007	9.75226	10.7431	0.080264	0.199422	0.138473	0.029606	0.138473	0.211302	55
BA_LE_DCLC_Large_Rate_onperms	BA_LE_DCLC_Large_Rate_onperms	612	0	0	0	0	1e-06	0	0	0	0	1e-06	0	0	0	0	0	0	1e-06	0	0.139316	0.291779	0.484662	0.07242	0.484662	0.150455	121
BA_LE_DCLC_Large_Rate_onperactms	BA_LE_DCLC_Large_Rate_onperactms	613	1e-06	2e-06	2e-06	1e-06	2e-06	1e-06	2e-06	1e-06	1e-06	2e-06	2e-06	2e-06	1e-06	2e-06	1e-06	2e-06	2e-06	1e-06	0.713131	0.889292	0.512839	0.075075	0.512839	-0.118362	131
BA_LE_DCLC_Large_ActProb	BA_LE_DCLC_Large_ActProb	614	1e-06	2e-06	2e-06	1e-06	2e-06	1e-06	2e-06	1e-06	1e-06	2e-06	2e-06	2e-06	1e-06	2e-06	1e-06	2e-06	2e-06	1e-06	0.713131	0.887598	0.512839	0.074974	0.512839	-0.118362	65
BA_LE_DCLC_ActProb	BA_LE_DCLC_ActProb	615	0.300347	0.245396	0.276311	0.271265	0.32606	0.316885	0.266245	0.373806	0.295317	0.276887	0.212775	0.257532	0.217562	0.18103	0.232946	0.287219	0.291424	0.282679	0.018959	0.077428	0.013228	0.008518	0.013228	0.29152	141
BA_LE_DCLC_MeanLickingCoeff_mgl	BA_LE_DCLC_MeanLickingCoeff_mgl	616	1.74122	1.66614	1.44747	2.06752	1.89473	1.85321	1.62688	1.65991	1.96418	1.41589	1.5571	1.74695	1.67358	1.55402	1.68666	1.51582	1.60913	1.98585	0.322688	0.557825	0.466587	0.072316	0.466587	0.063593	75
BA_LE_DCLC_DC_BoutThresh_mg	BA_LE_DCLC_DC_BoutThresh_mg	617	16.497	43.0699	15.2911	28.0316	6.95453	28.0316	20.7035	19.486	8.34124	5.13646	45.5214	10	53.5062	100.089	65.4848	21.9971	17.2616	30.6994	0.989666	0.833361	0.030262	0.011568	0.030262	-1.38448	602
BA_LE_DCLC_LC_BoutThresh_mg	BA_LE_DCLC_LC_BoutThresh_mg	618	18.1595	21.2749	10.6295	20.7035	21.9971	23.3714	19.486	21.9971	13.5456	13.5456	8.34124	6.16065	26.3832	24.8317	29.783	24.8317	16.2465	33.621	0.882751	0.955009	0.44024	0.069225	0.44024	-0.228429	596
BA_LE_DCLC_DC_ActProb	BA_LE_DCLC_DC_ActProb	619	0.485037	0.391246	0.443364	0.443076	0.55692	0.529274	0.416723	0.591838	0.47593	0.423172	0.345251	0.40237	0.335964	0.302697	0.384423	0.448391	0.464219	0.446649	0.018959	0.076947	0.009924	0.008196	0.009924	0.310021	512
BA_LE_DCLC_LC_ActProb	BA_LE_DCLC_LC_ActProb	620	0.083073	0.073291	0.076423	0.071697	0.057905	0.06863	0.090355	0.115982	0.081739	0.10185	0.056121	0.084225	0.075887	0.039707	0.05589	0.096269	0.089448	0.088782	0.220901	0.411242	0.335539	0.056985	0.335539	0.180734	142
BA_LE_DCLC_Small_MeanTotalBoutDur_ms	BA_LE_DCLC_Small_MeanTotalBoutDur_ms	621	3177.49	4727.87	3147.67	1419.8	4164.33	2585.33	8569	1861.4	527.133	3145.27	563	58.4	6215.53	7543.87	10673.6	4966.92	7144.4	657.2	0.747319	0.902642	0.358547	0.059129	0.358547	-0.573301	26
BA_LE_DCLC_Small_MeanTotalBoutIntake_mg	BA_LE_DCLC_Small_MeanTotalBoutIntake_mg	622	26.2833	31.455	8.20086	17.6405	56.231	20.9896	60.6269	21.2634	4.37828	20.9356	7.14045	1.48494	33.3353	51.5815	61.7378	37.5936	49.8303	8.93613	0.639549	0.834147	0.644539	0.089281	0.644539	-0.259145	92
BA_LE_DCLC_Small_BoutRate_onperms	BA_LE_DCLC_Small_BoutRate_onperms	623	0	0	0	0	0	0	0	0	0	0	0	0	0	0	0	0	0	0	0.322688	0.556353	0.480989	0.073392	0.480989	0.372028	58
BA_LE_DCLC_Small_BoutRate_onperactms	BA_LE_DCLC_Small_BoutRate_onperactms	624	0	0	0	0	0	0	1e-06	0	0	0	0	0	0	0	0	0	0	0	0.600777	0.819566	0.86209	0.110896	0.86209	0.092818	124
BA_LE_DCLC_Small_BoutNumber	BA_LE_DCLC_Small_BoutNumber	625	4.775	3.68654	2.2	3.4	6.46667	4.8	12.4667	2.8	1.46667	4.6	2.2	0.6	3.6	4.46667	5.8	4.69231	7.46667	0.666667	0.322688	0.554889	0.481142	0.072901	0.481142	0.373234	114
BA_LE_DCLC_Small_BoutProbability	BA_LE_DCLC_Small_BoutProbability	626	0.11383	0.102284	0.057692	0.108511	0.129506	0.115016	0.278689	0.072414	0.059783	0.089032	0.073333	0.017442	0.145553	0.149554	0.178279	0.113383	0.115345	0.025381	0.639549	0.832486	0.729487	0.09707	0.729487	0.15431	48
BA_LE_DCLC_Small_BoutPerCumIntake	BA_LE_DCLC_Small_BoutPerCumIntake	627	0.705569	0.745682	0.226543	0.497382	1.46181	0.501343	1.61242	0.601795	0.126297	0.616962	0.184032	0.034587	0.857683	1.12623	1.52314	0.885357	1.13251	0.221924	0.560761	0.78801	0.88411	0.111866	0.88411	-0.079775	80
BA_LE_DCLC_Small_BoutMeanDur_ms	BA_LE_DCLC_Small_BoutMeanDur_ms	628	678.278	1076.27	1430.76	417.588	643.969	538.611	687.353	664.786	359.409	683.754	255.909	97.3333	1726.54	1688.93	1840.28	1058.52	956.839	985.8	0.919736	0.955474	0.148473	0.031189	0.148473	-0.666088	14
BA_LE_DCLC_Small_BoutMeanSize_mg	BA_LE_DCLC_Small_BoutMeanSize_mg	629	5.24725	8.15782	3.72766	5.18838	8.69552	4.37283	4.86312	7.59407	2.98519	4.55121	3.24566	2.47491	9.2598	11.5481	10.6444	8.01175	6.6737	13.4042	0.93481	0.949989	0.078103	0.020459	0.078103	-0.636623	38
BA_LE_DCLC_Small_BoutMeanIntensity_mgs	BA_LE_DCLC_Small_BoutMeanIntensity_mgs	630	43.6287	25.5205	23.2727	53.7449	52.1928	61.5997	35.1501	27.8596	70.1206	25.089	31.2824	45.7337	19.0651	26.0736	26.6723	16.0706	21.959	17.3073	0.014064	0.067572	0.025374	0.010681	0.025374	0.77362	104
BA_LE_DCLC_Small_BoutRatioIntensity_mgs	BA_LE_DCLC_Small_BoutRatioIntensity_mgs	631	8.76403	10.5295	2.60538	12.4246	13.503	8.11871	7.07514	11.4233	8.30583	6.65622	12.6829	25.4271	5.36322	6.83754	5.78416	7.56879	6.97474	13.5973	0.520435	0.755719	0.52418	0.07622	0.52418	-0.264765	103
BA_LE_DCLC_Small_BoutSlopeIntensity_mgs	BA_LE_DCLC_Small_BoutSlopeIntensity_mgs	632	1.8071	4.48878	0.16494	4.38754	2.78858	3.04092	0.526085	2.21152	0.773623	0.56361	5.3526	6.49488	1.6418	5.05213	1.32113	3.05956	1.09657	11.8915	0.981041	0.88421	0.073791	0.019809	0.073791	-1.31265	37
BA_LE_DCLC_Small_BoutMeanSize_evtnum	BA_LE_DCLC_Small_BoutMeanSize_evtnum	633	3.0773	4.92722	2.60606	2.47059	4.71134	2.44444	2.83422	4.7619	1.5	3.28986	2.09091	1.33333	5.75926	7.46269	6.39081	5.29508	4.28571	6.8	0.947552	0.940987	0.054119	0.016873	0.054119	-0.679109	102
BA_LE_DCLC_Small_BoutMeanSize_evtdur	BA_LE_DCLC_Small_BoutMeanSize_evtdur	634	95.031	170.353	97.4848	72.8431	127.711	71.6944	87.0428	145.024	45.9545	112.493	88.3636	46.2222	220.056	243.821	217.943	186.393	128.723	231.3	0.985936	0.856717	0.019154	0.009683	0.019154	-0.842055	36
BA_LE_DCLC_Small_DC_MeanTotalBoutDur_ms	BA_LE_DCLC_Small_DC_MeanTotalBoutDur_ms	635	2783.35	3480.38	2869.4	1031.47	3974.6	1315.07	7694.87	1735	525.333	3121.07	283	58.4	4842.27	3003.67	8675.27	4168.62	6353.2	458.6	0.600777	0.817859	0.620212	0.086576	0.620212	-0.322421	44
BA_LE_DCLC_Small_DC_MeanTotalBoutIntake_mg	BA_LE_DCLC_Small_DC_MeanTotalBoutIntake_mg	636	23.657	22.7592	7.03282	14.1764	54.3234	14.7379	54.9904	19.56	4.24515	20.1895	5.30204	1.48494	27.595	20.8097	47.9416	30.1046	42.3668	6.46892	0.520435	0.754044	0.924871	0.11448	0.924871	0.055815	110
BA_LE_DCLC_Small_DC_BoutRate_onperms	BA_LE_DCLC_Small_DC_BoutRate_onperms	637	0	0	0	0	0	0	0	0	0	0	0	0	0	0	0	0	0	0	0.399223	0.633176	0.434787	0.069171	0.434787	0.420418	395
BA_LE_DCLC_Small_DC_BoutRate_onperactms	BA_LE_DCLC_Small_DC_BoutRate_onperactms	638	0	0	0	0	0	0	1e-06	0	0	0	0	0	0	0	0	0	0	0	0.639549	0.83083	0.792865	0.103718	0.792865	0.145219	307
BA_LE_DCLC_Small_DC_BoutNumber	BA_LE_DCLC_Small_DC_BoutNumber	639	4.19167	3.13205	1.93333	2.93333	5.73333	3.6	11.2	2.6	1.4	4.13333	1.93333	0.6	3.33333	3.73333	4.86667	3.92308	6.2	0.466667	0.360451	0.596287	0.434814	0.069074	0.434814	0.420416	468
BA_LE_DCLC_Small_DC_BoutProbability	BA_LE_DCLC_Small_DC_BoutProbability	640	0.111275	0.097238	0.05642	0.10628	0.123209	0.09507	0.276316	0.079918	0.061947	0.091043	0.070388	0.020179	0.147493	0.136919	0.163311	0.112832	0.10739	0.019391	0.639549	0.829182	0.663992	0.091158	0.663992	0.194544	463
BA_LE_DCLC_Small_DC_BoutPerCumIntake	BA_LE_DCLC_Small_DC_BoutPerCumIntake	641	0.703202	0.60632	0.214996	0.444579	1.48497	0.37661	1.59637	0.694979	0.134629	0.678484	0.148503	0.039422	0.786512	0.499641	1.27794	0.842393	1.08398	0.172168	0.439239	0.678526	0.70976	0.096341	0.70976	0.21386	411
BA_LE_DCLC_Small_DC_BoutMeanDur_ms	BA_LE_DCLC_Small_DC_BoutMeanDur_ms	642	672.379	919.193	1484.17	351.636	693.244	365.296	687.042	667.308	375.238	755.097	146.379	97.3333	1452.68	804.554	1782.59	1062.59	1024.71	982.714	0.882751	0.95343	0.326786	0.056027	0.326786	-0.451093	318
BA_LE_DCLC_Small_DC_BoutMeanSize_mg	BA_LE_DCLC_Small_DC_BoutMeanSize_mg	643	5.29864	7.16124	3.63766	4.83286	9.47501	4.09385	4.90986	7.52309	3.03225	4.88457	2.74243	2.47491	8.27849	5.57402	9.85101	7.67371	6.83336	13.862	0.860684	0.951618	0.241773	0.044864	0.241773	-0.434586	222
BA_LE_DCLC_Small_DC_BoutMeanIntensity_mgs	BA_LE_DCLC_Small_DC_BoutMeanIntensity_mgs	644	42.7332	26.1469	24.5172	57.0462	46.6421	57.5511	34.0844	28.9175	69.9377	23.1693	33.9961	45.7337	19.9884	28.775	26.4734	16.2928	19.9458	17.9701	0.014064	0.067079	0.035693	0.013179	0.035693	0.708717	277
BA_LE_DCLC_Small_DC_BoutRatioIntensity_mgs	BA_LE_DCLC_Small_DC_BoutRatioIntensity_mgs	645	9.25491	11.2889	2.45097	13.7439	13.6676	11.2069	7.14638	11.2738	8.08087	6.4688	18.7351	25.4271	5.69877	6.92809	5.52624	7.22172	6.66858	14.1058	0.560761	0.786319	0.50379	0.074354	0.50379	-0.286617	282
BA_LE_DCLC_Small_DC_BoutSlopeIntensity_mgs	BA_LE_DCLC_Small_DC_BoutSlopeIntensity_mgs	646	1.82083	4.66067	0.149301	3.75108	2.57051	4.14141	0.470374	2.21771	0.764814	0.501484	10.2269	6.49488	1.03401	1.65511	0.905292	2.89558	0.932517	13.141	0.93481	0.948514	0.132377	0.028757	0.132377	-1.35594	592
BA_LE_DCLC_Small_DC_BoutMeanSize_evtnum	BA_LE_DCLC_Small_DC_BoutMeanSize_evtnum	647	3.10974	4.28809	2.51724	2.31818	5.13954	2.27778	2.85119	4.71795	1.52381	3.53226	1.7931	1.33333	5.08	3.625	5.90411	5.03922	4.3871	7.14286	0.882751	0.951857	0.177137	0.035356	0.177137	-0.46354	267
BA_LE_DCLC_Small_DC_BoutMeanSize_evtdur	BA_LE_DCLC_Small_DC_BoutMeanSize_evtdur	648	95.7793	145.961	92.1379	67.2727	139.837	65.5	89.1667	144.769	46.8571	120.694	69.4828	46.2222	191.8	113.107	199.699	176.824	132.839	237.714	0.93481	0.947043	0.083302	0.021254	0.083302	-0.607796	272
BA_LE_DCLC_Small_LC_MeanTotalBoutDur_ms	BA_LE_DCLC_Small_LC_MeanTotalBoutDur_ms	649	394.142		278.267	388.333	189.733	1270.27	874.133	126.4	1.8	24.2	280		1373.27	4540.2	1998.33	798.308	791.2	198.6			0.086901	0.021712	0.086901		593
BA_LE_DCLC_Small_LC_MeanTotalBoutIntake_mg	BA_LE_DCLC_Small_LC_MeanTotalBoutIntake_mg	650	2.6263		1.16804	3.46409	1.90763	6.2517	5.63644	1.70337	0.133129	0.746034	1.83841		5.7403	30.7718	13.7962	7.48904	7.46352	2.46721			0.064551	0.018377	0.064551		591
BA_LE_DCLC_Small_LC_BoutRate_onperms	BA_LE_DCLC_Small_LC_BoutRate_onperms	651	0	0	0	0	0	0	0	0	0	0	0	0	0	0	0	0	0	0	0.479565	0.717088	0.899881	0.112676	0.899881	0.071437	590
BA_LE_DCLC_Small_LC_BoutRate_onperactms	BA_LE_DCLC_Small_LC_BoutRate_onperactms	652	0	0	0	0	0	0	0	0	0	0	0	0	0	0	0	0	0	0	0.677312	0.857719	0.806811	0.104908	0.806811	-0.147473	182
BA_LE_DCLC_Small_LC_BoutNumber	BA_LE_DCLC_Small_LC_BoutNumber	653	0.583333	0.554487	0.266667	0.466667	0.733333	1.2	1.26667	0.2	0.066667	0.466667	0.266667	0	0.266667	0.733333	0.933333	0.769231	1.26667	0.2	0.479565	0.715451	0.898075	0.112711	0.898075	0.073166	6
BA_LE_DCLC_Small_LC_BoutProbability	BA_LE_DCLC_Small_LC_BoutProbability	654	0.145393	0.15524	0.068966	0.125	0.215686	0.310345	0.301587	0.032609	0.034483	0.074468	0.105263	0	0.125	0.282051	0.341463	0.116279	0.180952	0.090909	0.639549	0.82754	0.863641	0.11057	0.863641	-0.094541	509
BA_LE_DCLC_Small_LC_BoutPerCumIntake	BA_LE_DCLC_Small_LC_BoutPerCumIntake	655	0.855939	2.20548	0.334816	0.967773	1.01221	2.28689	1.78776	0.236956	0.042474	0.178627	0.593643	0	1.51803	7.41363	4.57048	1.11368	1.51831	0.91606	0.860684	0.95001	0.169904	0.034681	0.169904	-1.36551	214
BA_LE_DCLC_Small_LC_BoutMeanDur_ms	BA_LE_DCLC_Small_LC_BoutMeanDur_ms	656	574.236		1043.5	832.143	258.727	1058.56	690.105	632	27	51.8571	1050		5149.75	6191.18	2141.07	1037.8	624.632	993			0.037481	0.013471	0.037481		589
BA_LE_DCLC_Small_LC_BoutMeanSize_mg	BA_LE_DCLC_Small_LC_BoutMeanSize_mg	657	4.52206		4.38015	7.42306	2.60131	5.20975	4.44982	8.51684	1.99693	1.59865	6.89403		21.5261	41.9616	14.7816	9.73576	5.89225	12.3361			0.022821	0.01016	0.022821		111
BA_LE_DCLC_Small_LC_BoutMeanIntensity_mgs	BA_LE_DCLC_Small_LC_BoutMeanIntensity_mgs	658	48.9139		14.25	32.9945	95.5892	73.7455	44.5726	14.107	73.9603	42.092	11.6079		7.52475	12.321	27.7097	14.9374	31.8132	15.7608			0.018299	0.009898	0.018299		45
BA_LE_DCLC_Small_LC_BoutRatioIntensity_mgs	BA_LE_DCLC_Small_LC_BoutRatioIntensity_mgs	659	19.1007		4.19755	8.92041	10.0543	4.92157	6.44803	13.476	73.9603	30.8279	6.56574		4.18003	6.77764	6.90385	9.38115	9.43317	12.423			0.240662	0.044735	0.240662		41
BA_LE_DCLC_Small_LC_BoutSlopeIntensity_mgs	BA_LE_DCLC_Small_LC_BoutSlopeIntensity_mgs	660			2.48956	5.93269	2.40306	2.57565	1.92388	-1.94426		10.2214	5.30259		2.41818	5.72449	5.03054	5.63301	5.42211	10.2984			0.19322	0.038144	0.19322		107
BA_LE_DCLC_Small_LC_BoutMeanSize_evtnum	BA_LE_DCLC_Small_LC_BoutMeanSize_evtnum	661	2.64338		3.25	3.42857	1.36364	2.94444	2.68421	5.33333	1	1.14286	4.25		14.25	27	8.92857	6.6	3.78947	6			0.024943	0.010751	0.024943		71
BA_LE_DCLC_Small_LC_BoutMeanSize_evtdur	BA_LE_DCLC_Small_LC_BoutMeanSize_evtdur	662	81.3435		136.25	107.857	32.9091	90.2778	68.2632	148.333	27	39.8571	225.25		573.25	909.273	313.071	235.2	108.579	216.333			0.012799	0.0086	0.012799		137
BA_LE_DCLC_Small_TotalDur_ms	BA_LE_DCLC_Small_TotalDur_ms	663	3177.49	4727.87	3147.67	1419.8	4164.33	2585.33	8569	1861.4	527.133	3145.27	563	58.4	6215.53	7543.87	10673.6	4966.92	7144.4	657.2	0.747319	0.900976	0.358547	0.059039	0.358547	-0.573301	17
BA_LE_DCLC_Small_TotalIntake_mg	BA_LE_DCLC_Small_TotalIntake_mg	664	26.2833	31.455	8.20086	17.6405	56.231	20.9896	60.6269	21.2634	4.37828	20.9356	7.14045	1.48494	33.3353	51.5815	61.7378	37.5936	49.8303	8.93613	0.639549	0.825905	0.644539	0.089167	0.644539	-0.259145	83
BA_LE_DCLC_Small_Number	BA_LE_DCLC_Small_Number	665	4.775	3.68654	2.2	3.4	6.46667	4.8	12.4667	2.8	1.46667	4.6	2.2	0.6	3.6	4.46667	5.8	4.69231	7.46667	0.666667	0.322688	0.553433	0.481142	0.072799	0.481142	0.373234	95
BA_LE_DCLC_Small_Probability	BA_LE_DCLC_Small_Probability	666	0.11383	0.102284	0.057692	0.108511	0.129506	0.115016	0.278689	0.072414	0.059783	0.089032	0.073333	0.017442	0.145553	0.149554	0.178279	0.113383	0.115345	0.025381	0.639549	0.824276	0.729487	0.096951	0.729487	0.15431	29
BA_LE_DCLC_Small_PerCumIntake	BA_LE_DCLC_Small_PerCumIntake	667	0.705569	0.745682	0.226543	0.497382	1.46181	0.501343	1.61242	0.601795	0.126297	0.616962	0.184032	0.034587	0.857683	1.12623	1.52314	0.885357	1.13251	0.221924	0.560761	0.784635	0.88411	0.111736	0.88411	-0.079775	51
BA_LE_DCLC_Small_Dur_ms	BA_LE_DCLC_Small_Dur_ms	668	678.278	1076.27	1430.76	417.588	643.969	538.611	687.353	664.786	359.409	683.754	255.909	97.3333	1726.54	1688.93	1840.28	1058.52	956.839	985.8	0.919736	0.953957	0.148473	0.031128	0.148473	-0.666088	117
BA_LE_DCLC_Small_Size_mg	BA_LE_DCLC_Small_Size_mg	669	5.24725	8.15782	3.72766	5.18838	8.69552	4.37283	4.86312	7.59407	2.98519	4.55121	3.24566	2.47491	9.2598	11.5481	10.6444	8.01175	6.6737	13.4042	0.93481	0.945577	0.078103	0.020409	0.078103	-0.636623	127
BA_LE_DCLC_Small_MeanIntensity_mgs	BA_LE_DCLC_Small_MeanIntensity_mgs	670	43.6287	25.5205	23.2727	53.7449	52.1928	61.5997	35.1501	27.8596	70.1206	25.089	31.2824	45.7337	19.0651	26.0736	26.6723	16.0706	21.959	17.3073	0.014064	0.066593	0.025374	0.01064	0.025374	0.77362	61
BA_LE_DCLC_Small_RatioIntensity_mgs	BA_LE_DCLC_Small_RatioIntensity_mgs	671	8.76403	10.5295	2.60538	12.4246	13.503	8.11871	7.07514	11.4233	8.30583	6.65622	12.6829	25.4271	5.36322	6.83754	5.78416	7.56879	6.97474	13.5973	0.520435	0.752375	0.52418	0.076117	0.52418	-0.264765	709
BA_LE_DCLC_Small_Rate_onperms	BA_LE_DCLC_Small_Rate_onperms	672	0	0	0	0	0	0	0	0	0	0	0	0	0	0	0	0	0	0	0.322688	0.551984	0.480989	0.073289	0.480989	0.372028	716
BA_LE_DCLC_Small_Rate_onperactms	BA_LE_DCLC_Small_Rate_onperactms	673	0	0	0	0	0	0	1e-06	0	0	0	0	0	0	0	0	0	0	0	0.600777	0.816159	0.86209	0.110764	0.86209	0.092818	720
BA_LE_DCLC_Small_ActProb	BA_LE_DCLC_Small_ActProb	674	0	0	0	0	0	0	1e-06	0	0	0	0	0	0	0	0	0	0	0	0.600777	0.814465	0.86209	0.110633	0.86209	0.092818	727
BA_ME_APIP_Go_BoutTotDur_ms	BA_ME_APIP_Go_BoutTotDur_ms	675	3.43156e+06	4.5092e+06	2.86285e+06	2.22451e+06	7.36529e+06	2652880	3514000	2.68684e+06	1554020	4.59212e+06	6.92285e+06	2980836	6.99304e+06	3632380	2.30463e+06	4.17263e+06	6.22559e+06	2.84167e+06	0.902564	0.96368	0.269037	0.048108	0.269037	-0.394006	686
BA_ME_APIP_Go_BoutTotMove_cm	BA_ME_APIP_Go_BoutTotMove_cm	676	32006.7	44184.9	25733.9	13845.2	94528.6	29165.8	31521.8	18987.9	10207.7	32062.7	76297.4	30907.5	70805.9	37688.2	15825	31549.9	66211.9	24193.1	0.902564	0.962108	0.346153	0.057969	0.346153	-0.465179	688
BA_ME_APIP_Go_BoutPerDur	BA_ME_APIP_Go_BoutPerDur	677	4.31274	5.61188	3.5675	2.78609	9.26191	3.34026	4.4245	3.38302	1.95668	5.78196	8.64458	3.70256	8.69612	4.51186	2.86263	5.18291	7.75471	3.53963	0.902564	0.960541	0.286892	0.050303	0.286892	-0.379879	675
BA_ME_APIP_Go_BoutPerMove	BA_ME_APIP_Go_BoutPerMove	678	72.7806	76.2189	71.3785	68.5258	76.2233	75.8025	72.2615	74.5116	63.3864	80.1553	81.6341	77.9935	78.7466	75.2635	74.3252	74.3832	79.9733	67.4322	0.882751	0.950289	0.175421	0.035274	0.175421	-0.066596	677
BA_ME_APIP_Go_BoutMeanNumber	BA_ME_APIP_Go_BoutMeanNumber	679	1771.49	2595.84	1661.64	745.933	4775.46	1885.87	2026.13	1020	596.467	1460.4	4083.23	1648.07	4355.44	2431.4	791.533	2079.2	3846.87	1531	0.919736	0.952445	0.234576	0.043981	0.234576	-0.551241	844
BA_ME_APIP_Go_BoutMeanDur_ms	BA_ME_APIP_Go_BoutMeanDur_ms	680	2221.55	1874.57	1722.9	2982.18	1542.32	1406.72	1734.34	2634.16	2605.38	3144.42	1695.43	1808.69	1605.59	1493.95	2911.6	2006.84	1618.35	1856.08	0.252681	0.45611	0.254337	0.046321	0.254337	0.24501	513
BA_ME_APIP_Go_BoutMeanMove_cm	BA_ME_APIP_Go_BoutMeanMove_cm	681	17.8187	17.1722	15.487	18.5609	19.7946	15.4655	15.5576	18.6156	17.1136	21.9547	18.6855	18.7538	16.2569	15.5006	19.9929	15.1741	17.2119	15.8021	0.479565	0.713821	0.545708	0.078298	0.545708	0.053314	64
BA_ME_APIP_Go_BoutMeanSpeed_cms	BA_ME_APIP_Go_BoutMeanSpeed_cms	682	9.96336	10.5856	9.76731	8.05011	13.849	12.1187	9.34234	9.61277	8.43262	8.53404	11.5231	12.0137	10.4063	11.5614	9.12558	8.29229	11.9961	9.76639	0.779099	0.922274	0.485749	0.072383	0.485749	-0.087399	130
BA_ME_APIP_Go_BoutRatioSpeed_cms	BA_ME_APIP_Go_BoutRatioSpeed_cms	683	8.57865	9.43345	8.98891	6.22393	12.8343	10.994	8.97034	7.06701	6.56855	6.98212	11.0211	10.3688	10.1252	10.3756	6.86663	7.56116	10.6354	8.51369	0.835897	0.943367	0.406367	0.065713	0.406367	-0.137034	54
BA_ME_APIP_Go_BoutSlopeSpeed_cms	BA_ME_APIP_Go_BoutSlopeSpeed_cms	684	8.69956	9.79936	9.61969	6.10206	12.7721	12.0501	9.55604	6.49967	6.15876	6.83801	11.9355	10.1989	11.0778	10.4566	6.63006	8.63886	10.927	8.53018	0.835897	0.941741	0.348415	0.058078	0.348415	-0.171746	120
BA_ME_APIP_Go_BoutMeanAngle_deg	BA_ME_APIP_Go_BoutMeanAngle_deg	685	21.9497	24.1128	18.458	23.9005	21.0254	24.3138	21.1221	23.0667	21.6428	22.0687	23.3217	24.5662	26.1202	25.5165	21.3302	23.8838	23.59	24.5735	0.989666	0.832289	0.022133	0.010061	0.022133	-0.135593	297
BA_ME_APIP_Go_AP_BoutTotDur_ms	BA_ME_APIP_Go_AP_BoutTotDur_ms	686	3.15256e+06	4.27081e+06	2.61619e+06	1.99503e+06	6.99278e+06	2.46366e+06	3.30689e+06	2.43437e+06	1.31755e+06	4.09398e+06	6.66133e+06	2.76499e+06	6.74405e+06	3.40217e+06	2.12017e+06	3887392	5.99056e+06	2.59579e+06	0.902564	0.958979	0.242539	0.044929	0.242539	-0.437985	381
BA_ME_APIP_Go_AP_BoutTotMove_cm	BA_ME_APIP_Go_AP_BoutTotMove_cm	687	30053.3	42375.9	24070.5	12643.4	90629.5	27464.7	30116.5	17556.4	8876.42	29069.1	74118.7	29234.3	68700.1	35617.7	14790.2	29833	64284	22429.1	0.919736	0.950938	0.329632	0.056336	0.329632	-0.495719	388
BA_ME_APIP_Go_AP_BoutPerDur	BA_ME_APIP_Go_AP_BoutPerDur	688	7.34819	9.82122	6.03665	4.83154	15.6744	5.75782	7.8115	5.83896	3.23904	9.59566	15.2066	6.49404	15.0761	8.02133	5.1369	9.0867	13.4216	6.12637	0.919736	0.949436	0.236969	0.0442	0.236969	-0.418513	302
BA_ME_APIP_Go_AP_BoutPerMove	BA_ME_APIP_Go_AP_BoutPerMove	689	73.9998	77.1133	72.9883	69.6941	76.7271	76.5252	74.1105	76.0193	64.0712	81.8629	82.302	79.1135	79.1916	75.6894	76.3999	75.8771	80.3841	67.9489	0.882751	0.948726	0.221699	0.0423	0.221699	-0.059458	292
BA_ME_APIP_Go_AP_BoutMeanNumber	BA_ME_APIP_Go_AP_BoutMeanNumber	690	1647.01	2473.1	1528.43	677.4	4533.15	1759	1914.93	933.533	520.133	1309.53	3928.85	1536.87	4221.22	2287	734.4	1942.73	3719.13	1414.6	0.93481	0.944116	0.221349	0.042383	0.221349	-0.586467	420
BA_ME_APIP_Go_AP_BoutMeanDur_ms	BA_ME_APIP_Go_AP_BoutMeanDur_ms	691	2199.25	1864.19	1711.69	2945.13	1542.59	1400.6	1726.9	2607.69	2533.11	3126.29	1695.49	1799.11	1597.65	1487.61	2886.94	2000.99	1610.74	1835	0.252681	0.454854	0.261867	0.047216	0.261867	0.238461	374
BA_ME_APIP_Go_AP_BoutMeanMove_cm	BA_ME_APIP_Go_AP_BoutMeanMove_cm	692	17.9771	17.2965	15.7486	18.6646	19.9926	15.6138	15.7272	18.8064	17.0657	22.198	18.8653	19.022	16.2749	15.574	20.1392	15.3562	17.2847	15.8554	0.399223	0.631643	0.530955	0.076587	0.530955	0.055684	313
BA_ME_APIP_Go_AP_BoutMeanSpeed_cms	BA_ME_APIP_Go_AP_BoutMeanSpeed_cms	693	10.1491	10.7121	10.0221	8.19901	13.9572	12.3011	9.50041	9.80997	8.70362	8.69931	11.6326	12.2528	10.4472	11.6431	9.2737	8.44622	12.1034	9.89809	0.779099	0.920606	0.524347	0.07604	0.524347	-0.077898	402
BA_ME_APIP_Go_AP_BoutRatioSpeed_cms	BA_ME_APIP_Go_AP_BoutRatioSpeed_cms	694	8.72537	9.54717	9.2006	6.33743	12.9604	11.1479	9.10721	7.2119	6.73705	7.10043	11.1267	10.573	10.1868	10.4691	6.97597	7.67429	10.7309	8.64058	0.808858	0.93053	0.424609	0.068053	0.424609	-0.129856	312
BA_ME_APIP_Go_AP_BoutSlopeSpeed_cms	BA_ME_APIP_Go_AP_BoutSlopeSpeed_cms	695	8.84585	9.91496	9.86494	6.25308	12.9137	12.2046	9.6794	6.66571	6.27625	6.90916	12.0362	10.3849	11.1676	10.5532	6.76952	8.73808	11.0135	8.65668	0.835897	0.94012	0.362241	0.059557	0.362241	-0.164607	353
BA_ME_APIP_Go_AP_BoutMeanAngle_deg	BA_ME_APIP_Go_AP_BoutMeanAngle_deg	696	22.2572	24.3596	18.6441	24.2842	21.2294	24.6796	21.3777	23.3329	22.1605	22.3494	23.4579	24.9412	26.4113	25.7254	21.4655	24.0882	23.8671	24.9203	0.989666	0.831219	0.029714	0.01144	0.029714	-0.130218	462
BA_ME_APIP_Go_IP_BoutTotDur_ms	BA_ME_APIP_Go_IP_BoutTotDur_ms	697	279005	238397	246654	229476	372508	189221	207109	252473	236467	498133	261518	215851	248989	230213	184460	285239	235031	245877	0.399223	0.630118	0.307684	0.053601	0.307684	0.226924	782
BA_ME_APIP_Go_IP_BoutTotMove_cm	BA_ME_APIP_Go_IP_BoutTotMove_cm	698	1953.37	1809	1663.32	1201.81	3899.1	1701.14	1405.23	1431.5	1331.25	2993.63	2178.68	1673.23	2105.89	2070.54	1034.8	1716.99	1927.9	1763.95	0.835897	0.938505	0.698699	0.094959	0.698699	0.110776	648
BA_ME_APIP_Go_IP_BoutPerDur	BA_ME_APIP_Go_IP_BoutPerDur	699	0.755031	0.640774	0.668266	0.595244	1.06707	0.516527	0.558429	0.669165	0.610328	1.35522	0.720879	0.569074	0.697794	0.604339	0.470153	0.756076	0.659313	0.648569	0.479565	0.712198	0.315121	0.05472	0.315121	0.23672	647
BA_ME_APIP_Go_IP_BoutPerMove	BA_ME_APIP_Go_IP_BoutPerMove	700	59.6384	62.5561	54.1082	58.2529	66.1309	65.7732	47.085	59.9332	59.1694	66.654	63.9713	62.5273	66.5465	68.6221	53.5432	55.4233	68.3287	61.4866	0.835897	0.936895	0.363651	0.059607	0.363651	-0.068911	643
BA_ME_APIP_Go_IP_BoutMeanNumber	BA_ME_APIP_Go_IP_BoutMeanNumber	701	124.474	122.743	133.214	68.5333	242.308	126.867	111.2	86.4667	76.3333	150.867	154.385	111.2	134.222	144.4	57.1333	136.467	127.733	116.4	0.713131	0.885911	0.939415	0.115619	0.939415	0.020204	545
BA_ME_APIP_Go_IP_BoutMeanDur_ms	BA_ME_APIP_Go_IP_BoutMeanDur_ms	702	2426.35	2044.44	1851.56	3348.38	1537.33	1491.5	1862.49	2919.89	3097.82	3301.81	1693.94	1941.1	1855.05	1594.28	3228.59	2090.18	1840.01	2112.34	0.322688	0.550543	0.279245	0.049201	0.279245	0.247084	364
BA_ME_APIP_Go_IP_BoutMeanMove_cm	BA_ME_APIP_Go_IP_BoutMeanMove_cm	703	15.7497	15.0161	12.4861	17.5362	16.0915	13.4089	12.6369	16.5555	17.44	19.8429	14.112	15.0471	15.6896	14.3389	18.1121	12.5818	15.0932	15.1542	0.286869	0.50938	0.512248	0.075192	0.512248	0.068817	629
BA_ME_APIP_Go_IP_BoutMeanSpeed_cms	BA_ME_APIP_Go_IP_BoutMeanSpeed_cms	704	7.82835	8.399	6.84451	6.57834	11.8249	9.58954	6.62035	7.48364	6.586	7.09952	8.73568	8.70853	9.11904	10.2675	7.22156	6.10105	8.87279	8.16587	0.860684	0.948408	0.490812	0.073036	0.490812	-0.10151	669
BA_ME_APIP_Go_IP_BoutRatioSpeed_cms	BA_ME_APIP_Go_IP_BoutRatioSpeed_cms	705	6.94156	7.56759	6.74353	5.2372	10.4672	8.99024	6.78494	5.66989	5.62976	6.00971	8.33087	7.75181	8.45777	8.99402	5.60991	6.01949	8.20278	7.17411	0.860684	0.946811	0.435365	0.06906	0.435365	-0.124576	535
BA_ME_APIP_Go_IP_BoutSlopeSpeed_cms	BA_ME_APIP_Go_IP_BoutSlopeSpeed_cms	706	7.30492	8.05354	7.67402	5.08044	10.1633	10.3169	7.95848	5.19524	5.86754	6.18345	9.14367	8.14167	8.89983	9.10009	5.30868	7.11194	9.21907	7.5034	0.808858	0.928894	0.410568	0.066195	0.410568	-0.140755	634
BA_ME_APIP_Go_IP_BoutMeanAngle_deg	BA_ME_APIP_Go_IP_BoutMeanAngle_deg	707	18.4427	19.357	16.3228	20.1072	17.2088	19.2413	16.7209	20.193	18.115	19.6327	19.8541	19.384	16.9636	22.2078	19.5918	20.9737	15.5221	20.3588	0.860684	0.94522	0.347144	0.058045	0.347144	-0.069802	633
BA_ME_APIP_Stop_BoutTotDur_ms	BA_ME_APIP_Stop_BoutTotDur_ms	708	7.61586e+07	7.58772e+07	77385249	7.76189e+07	7.21571e+07	7.67686e+07	7.59074e+07	7.67346e+07	7.78674e+07	7.48293e+07	7.31603e+07	7.75266e+07	7.34225e+07	7.68751e+07	7.82028e+07	7.63348e+07	7.40558e+07	77439773	0.479565	0.710584	0.777881	0.102128	0.777881	0.00534	618
BA_ME_APIP_Stop_BoutTotMove_cm	BA_ME_APIP_Stop_BoutTotMove_cm	709	10988.1	12747.5	10318.8	6359.16	29486.8	9310.27	12100	6495.26	5896.21	7938.03	17165.3	8720.83	19110.3	12386.8	5466.58	10865.5	16580.6	11684.5	0.902564	0.957423	0.59072	0.083428	0.59072	-0.214281	520
BA_ME_APIP_Stop_BoutPerDur	BA_ME_APIP_Stop_BoutPerDur	710	95.6873	94.3881	96.4325	97.2139	90.7381	96.6597	95.5755	96.617	98.0433	94.218	91.3554	96.2974	91.3039	95.4881	97.1374	94.8171	92.2453	96.4604	0.117249	0.259714	0.286892	0.050385	0.286892	0.019722	845
BA_ME_APIP_Stop_BoutPerMove	BA_ME_APIP_Stop_BoutPerMove	711	27.2194	23.7811	28.6215	31.4742	23.7767	24.1975	27.7385	25.4884	36.6136	19.8447	18.3659	22.0065	21.2534	24.7365	25.6748	25.6168	20.0267	32.5678	0.139316	0.290846	0.175421	0.035209	0.175421	0.194823	742
BA_ME_APIP_Stop_BoutMeanNumber	BA_ME_APIP_Stop_BoutMeanNumber	712	1772.46	2596.83	1662.64	746.867	4776.46	1886.87	2027.13	1021	597.467	1461.27	4084.23	1649.07	4356.44	2432.4	792.533	2080.13	3847.87	1531.93	0.919736	0.947939	0.234575	0.044057	0.234575	-0.550994	753
BA_ME_APIP_Stop_BoutMeanDur_ms	BA_ME_APIP_Stop_BoutMeanDur_ms	713	62550.3	39818.9	46543.5	103926	15106.8	40685.7	37445.7	75156.3	130329	51208.5	17912.9	47012.4	16853.8	31604.6	98674.5	36697.1	19246	50550.4	0.097436	0.232367	0.191317	0.037838	0.191317	0.651561	798
BA_ME_APIP_Stop_BoutMeanMove_cm	BA_ME_APIP_Stop_BoutMeanMove_cm	714	6.6825	5.37846	6.20628	8.51445	6.17335	4.93425	5.96905	6.36167	9.86869	5.4323	4.20282	5.28834	4.38666	5.09242	6.89761	5.22345	4.30905	7.62732	0.041492	0.1205	0.097574	0.023302	0.097574	0.313196	796
BA_ME_APIP_Stop_BoutMeanSpeed_cms	BA_ME_APIP_Stop_BoutMeanSpeed_cms	715	0.837498	0.938514	0.953968	0.556799	1.38529	1.00963	1.05264	0.589532	0.52934	0.622789	1.20711	0.901297	1.10536	0.962437	0.552575	0.818973	1.13824	0.822118	0.779099	0.918944	0.459905	0.071795	0.459905	-0.164291	756
BA_ME_APIP_Stop_BoutRatioSpeed_cms	BA_ME_APIP_Stop_BoutRatioSpeed_cms	716	0.146381	0.169443	0.133344	0.081928	0.408647	0.121277	0.159405	0.084646	0.075721	0.106082	0.234625	0.112488	0.260278	0.161129	0.069903	0.14234	0.223894	0.150886	0.902564	0.955871	0.61738	0.086404	0.61738	-0.211067	754
BA_ME_APIP_Stop_BoutSlopeSpeed_cms	BA_ME_APIP_Stop_BoutSlopeSpeed_cms	717	0.016932	0.013783	0.020829	0.012814	0.017329	0.00933	0.02391	0.015589	0.014297	0.021356	0.015185	0.011378	0.01257	0.009469	0.016652	0.019216	0.009033	0.016759	0.097436	0.231522	0.169096	0.034646	0.169096	0.296847	837
BA_ME_APIP_Stop_BoutMeanAngle_deg	BA_ME_APIP_Stop_BoutMeanAngle_deg	718	58.7936	57.7995	53.259	63.9911	57.9843	56.7054	54.7237	61.4452	62.67	59.5703	53.3143	58.7815	57.0064	58.8032	61.8932	54.7017	56.5161	61.3793	0.286869	0.507999	0.57215	0.081443	0.57215	0.024604	835
BA_ME_APIP_Stop_AP_BoutTotDur_ms	BA_ME_APIP_Stop_AP_BoutTotDur_ms	719	3.92723e+07	3.88028e+07	4.07223e+07	3.92969e+07	3.76201e+07	4.03244e+07	3.90267e+07	39257456	3.93597e+07	3.8571e+07	3.71441e+07	3.98123e+07	3.79893e+07	3.90118e+07	3.91532e+07	38893752	3.8643e+07	3.9775e+07	0.164103	0.327925	0.329173	0.056346	0.329173	0.017352	745
BA_ME_APIP_Stop_AP_BoutTotMove_cm	BA_ME_APIP_Stop_AP_BoutTotMove_cm	720	9724.74	11683.5	8908.09	5497.88	27489.8	8425.04	10520.8	5538.27	4977.57	6440.36	15938.2	7718.06	18051.6	11440	4568.73	9484.49	15687	10579.7	0.919736	0.946446	0.536274	0.077149	0.536274	-0.264739	787
BA_ME_APIP_Stop_AP_BoutPerDur	BA_ME_APIP_Stop_AP_BoutPerDur	721	92.6518	90.1788	93.9634	95.1685	84.3256	94.2422	92.1885	94.161	96.761	90.4043	84.7934	93.506	84.9239	91.9787	94.8631	90.9133	86.5784	93.8736	0.097436	0.230683	0.236969	0.044124	0.236969	0.039031	743
BA_ME_APIP_Stop_AP_BoutPerMove	BA_ME_APIP_Stop_AP_BoutPerMove	722	26.0002	22.8867	27.0117	30.3059	23.2729	23.4748	25.8895	23.9807	35.9288	18.1371	17.698	20.8865	20.8084	24.3106	23.6001	24.1229	19.6159	32.0511	0.139316	0.28992	0.221699	0.042225	0.221699	0.184014	785
BA_ME_APIP_Stop_AP_BoutMeanNumber	BA_ME_APIP_Stop_AP_BoutMeanNumber	723	1646.02	2472.1	1527.5	676.4	4532.15	1758	1913.93	932.533	519.133	1308.53	3927.85	1535.87	4220.22	2286	733.4	1941.73	3718.13	1413.6	0.93481	0.942659	0.221354	0.042309	0.221354	-0.586752	824
BA_ME_APIP_Stop_AP_BoutMeanDur_ms	BA_ME_APIP_Stop_AP_BoutMeanDur_ms	724	35472.2	21674	26659.4	58097.1	8300.71	22937.7	20390.8	42097.6	75818.1	29476.5	9456.61	25921.7	9001.72	17065.5	53385.9	20030.4	10393.1	28137.4	0.080264	0.198666	0.164175	0.033895	0.164175	0.710722	826
BA_ME_APIP_Stop_AP_BoutMeanMove_cm	BA_ME_APIP_Stop_AP_BoutMeanMove_cm	725	6.34548	5.14776	5.83181	8.12815	6.06551	4.7924	5.49697	5.93895	9.58823	4.92182	4.05776	5.02521	4.27741	5.00439	6.22953	4.88455	4.21906	7.4842	0.06519	0.173163	0.117681	0.026973	0.117681	0.301784	823
BA_ME_APIP_Stop_AP_BoutMeanSpeed_cms	BA_ME_APIP_Stop_AP_BoutMeanSpeed_cms	726	0.842969	0.943779	0.959105	0.560012	1.39324	1.01517	1.05576	0.597214	0.530921	0.632329	1.21111	0.908511	1.1087	0.96763	0.55771	0.825174	1.14426	0.827144	0.779099	0.917288	0.461087	0.071876	0.461087	-0.16297	834
BA_ME_APIP_Stop_AP_BoutRatioSpeed_cms	BA_ME_APIP_Stop_AP_BoutRatioSpeed_cms	727	0.250301	0.302982	0.218752	0.139906	0.730722	0.208932	0.26958	0.141076	0.126464	0.166974	0.429092	0.193861	0.475177	0.293245	0.116689	0.243856	0.405947	0.265988	0.902564	0.954324	0.537005	0.077151	0.537005	-0.275569	842
BA_ME_APIP_Stop_AP_BoutSlopeSpeed_cms	BA_ME_APIP_Stop_AP_BoutSlopeSpeed_cms	728	0.033662	0.034405	0.04146	0.023751	0.04809	0.025898	0.047934	0.025501	0.028212	0.028451	0.052629	0.022469	0.024489	0.031356	0.024963	0.041666	0.026266	0.0514	0.520435	0.750714	0.898627	0.112649	0.898627	-0.03147	831
BA_ME_APIP_Stop_AP_BoutMeanAngle_deg	BA_ME_APIP_Stop_AP_BoutMeanAngle_deg	729	58.9304	57.9341	53.3794	64.0029	58.2491	57.0779	55.0102	61.4186	62.806	59.4996	53.4469	59.1757	57.1372	58.9217	61.6582	54.776	56.6699	61.6874	0.322688	0.549109	0.565151	0.080766	0.565151	0.0246	548
BA_ME_APIP_Stop_IP_BoutTotDur_ms	BA_ME_APIP_Stop_IP_BoutTotDur_ms	730	3.68863e+07	3.70744e+07	3.66629e+07	3.83221e+07	3.4537e+07	3.64442e+07	3.68807e+07	3.74771e+07	3.85077e+07	3.62583e+07	3.60162e+07	3.77143e+07	3.54333e+07	3.78632e+07	3.90496e+07	3.74411e+07	3.54128e+07	3.76648e+07	0.600777	0.812779	0.774278	0.101902	0.774278	-0.00734	278
BA_ME_APIP_Stop_IP_BoutTotMove_cm	BA_ME_APIP_Stop_IP_BoutTotMove_cm	731	1263.34	1064.07	1410.74	861.28	1996.93	885.235	1579.22	956.99	918.645	1497.67	1227.03	1002.77	1058.65	946.77	897.85	1380.97	893.609	1104.88	0.322688	0.547683	0.233584	0.044024	0.233584	0.247653	238
BA_ME_APIP_Stop_IP_BoutPerDur	BA_ME_APIP_Stop_IP_BoutPerDur	732	99.245	99.3592	99.3317	99.4048	98.9329	99.4835	99.4416	99.3308	99.3897	98.6448	99.2791	99.4309	99.3022	99.3957	99.5298	99.2439	99.3407	99.3514	0.560761	0.782958	0.315121	0.054633	0.315121	-0.00166	258
BA_ME_APIP_Stop_IP_BoutPerMove	BA_ME_APIP_Stop_IP_BoutPerMove	733	40.3616	37.4439	45.8918	41.7471	33.8691	34.2268	52.915	40.0668	40.8306	33.346	36.0287	37.4727	33.4535	31.3779	46.4568	44.5767	31.6713	38.5134	0.191142	0.373953	0.363651	0.059698	0.363651	0.108255	248
BA_ME_APIP_Stop_IP_BoutMeanNumber	BA_ME_APIP_Stop_IP_BoutMeanNumber	734	126.44	124.726	135.143	70.4667	244.308	128.867	113.2	88.4667	78.3333	152.733	156.385	113.2	136.222	146.4	59.1333	138.4	129.733	118.333	0.713131	0.88423	0.940016	0.115561	0.940016	0.019688	228
BA_ME_APIP_Stop_IP_BoutMeanDur_ms	BA_ME_APIP_Stop_IP_BoutMeanDur_ms	735	339714	325546	271290	543832	141367	282805	325801	423630	491588	237396	230305	333165	260114	258629	660365	270528	272966	318294	0.322688	0.546264	0.839946	0.108954	0.839946	0.061459	268
BA_ME_APIP_Stop_IP_BoutMeanMove_cm	BA_ME_APIP_Stop_IP_BoutMeanMove_cm	736	10.5008	9.04123	10.4389	12.2225	8.17384	6.86939	13.9507	10.8175	11.7274	9.80579	7.84626	8.85839	7.77147	6.46701	15.1835	9.97813	6.88804	9.33705	0.080264	0.197917	0.265283	0.047673	0.265283	0.215902	724
BA_ME_APIP_Stop_IP_BoutMeanSpeed_cms	BA_ME_APIP_Stop_IP_BoutMeanSpeed_cms	737	0.77026	0.842764	0.895905	0.525961	1.23766	0.934079	0.999995	0.508565	0.51886	0.541056	1.1066	0.803416	1.00203	0.881354	0.488886	0.731974	0.965776	0.762079	0.677312	0.85606	0.557429	0.079768	0.557429	-0.129782	713
BA_ME_APIP_Stop_IP_BoutRatioSpeed_cms	BA_ME_APIP_Stop_IP_BoutRatioSpeed_cms	738	0.034573	0.028748	0.038479	0.022475	0.05782	0.02429	0.04282	0.025535	0.023856	0.041306	0.034069	0.026589	0.029877	0.025005	0.022993	0.036884	0.025234	0.029335	0.322688	0.544852	0.242891	0.044917	0.242891	0.266159	366
BA_ME_APIP_Stop_IP_BoutSlopeSpeed_cms	BA_ME_APIP_Stop_IP_BoutSlopeSpeed_cms	739	0.013213	0.010621	0.016365	0.009462	0.012794	0.006136	0.019952	0.012485	0.010059	0.018449	0.012259	0.008727	0.009136	0.006491	0.014442	0.015801	0.006216	0.011895	0.117249	0.258836	0.236123	0.044118	0.236123	0.315053	538
BA_ME_APIP_Stop_IP_BoutMeanAngle_deg	BA_ME_APIP_Stop_IP_BoutMeanAngle_deg	740	56.753	55.1997	51.8987	63.8779	53.0731	51.6237	49.8793	61.7256	61.7694	60.1759	49.9856	53.4334	52.9537	56.9522	64.8075	53.6597	52.1074	57.6982	0.479565	0.708976	0.556353	0.079719	0.556353	0.040035	631
BA_ME_DCLC_Go_BoutTotDur_ms	BA_ME_DCLC_Go_BoutTotDur_ms	741	4.05835e+06	3.16782e+06	2652880	2980836	6.99304e+06	2.84167e+06	4678276	2821988	3.42764e+06	6.07047e+06	2.22451e+06	2.68684e+06	4.59212e+06	4.17263e+06	2.6396e+06	3.2189e+06	3.93537e+06	1.87257e+06	0.117249	0.257965	0.214744	0.041559	0.214744	0.357405	671
BA_ME_DCLC_Go_BoutTotMove_cm	BA_ME_DCLC_Go_BoutTotMove_cm	742	41864.3	24244.4	29165.8	30907.5	70805.9	24193.1	51256.4	29426.3	29361.7	69797.2	13845.2	18987.9	32062.7	31549.9	18018.7	35105.3	33177.3	11208.1	0.117249	0.257099	0.036877	0.013433	0.036877	0.788068	645
BA_ME_DCLC_Go_BoutRate_onperms	BA_ME_DCLC_Go_BoutRate_onperms	743	3.2e-05	1.7e-05	2.4e-05	2e-05	5.4e-05	1.9e-05	4.1e-05	2.7e-05	1.8e-05	5.5e-05	9e-06	1.3e-05	1.8e-05	2.6e-05	1.1e-05	2.4e-05	2.4e-05	8e-06	0.024942	0.087623	0.021816	0.010129	0.021816	0.958133	275
BA_ME_DCLC_Go_BoutRate_onperactms	BA_ME_DCLC_Go_BoutRate_onperactms	744	8.8e-05	5.1e-05	8.6e-05	7.5e-05	0.000119	6e-05	9.9e-05	7.2e-05	6.1e-05	0.000129	4.4e-05	5e-05	4.4e-05	5.9e-05	3.8e-05	8.3e-05	5.8e-05	2.8e-05	0.000932	0.02649	0.003991	0.006747	0.003991	0.797618	285
BA_ME_DCLC_Go_BoutMeanNumber	BA_ME_DCLC_Go_BoutMeanNumber	745	2591.23	1334.37	1885.87	1648.07	4355.44	1531	3316.07	2161.73	1435.4	4396.27	745.933	1020	1460.4	2079.2	881.462	1930.93	1917.8	639.267	0.024942	0.087155	0.021966	0.010069	0.021966	0.957474	788
BA_ME_DCLC_Go_BoutMeanDur_ms	BA_ME_DCLC_Go_BoutMeanDur_ms	746	1645.26	2551.31	1406.72	1808.69	1605.59	1856.08	1410.79	1305.43	2387.94	1380.82	2982.18	2634.16	3144.42	2006.84	2994.57	1667.02	2052.02	2929.24	0.999068	0.766234	0.001836	0.00685	0.001836	-0.632924	799
BA_ME_DCLC_Go_BoutMeanMove_cm	BA_ME_DCLC_Go_BoutMeanMove_cm	747	16.4599	18.47	15.4655	18.7538	16.2569	15.8021	15.457	13.6124	20.4554	15.8765	18.5609	18.6156	21.9547	15.1741	20.4419	18.1805	17.2997	17.5327	0.93481	0.941206	0.075518	0.019926	0.075518	-0.166224	407
BA_ME_DCLC_Go_BoutMeanSpeed_cms	BA_ME_DCLC_Go_BoutMeanSpeed_cms	748	11.3996	9.02052	12.1187	12.0137	10.4063	9.76639	12.2241	11.3635	11.2924	12.0118	8.05011	9.61277	8.53404	8.29229	9.31285	11.6172	9.05528	7.68953	0.000932	0.025386	0.00059	0.015955	0.00059	0.337703	379
BA_ME_DCLC_Go_BoutRatioSpeed_cms	BA_ME_DCLC_Go_BoutRatioSpeed_cms	749	10.1812	7.49781	10.994	10.3688	10.1252	8.51369	10.9563	10.4275	8.56615	11.4978	6.22393	7.06701	6.98212	7.56116	6.8263	10.906	8.43056	5.98539	0.001476	0.027562	0.001439	0.007076	0.001439	0.441364	393
BA_ME_DCLC_Go_BoutSlopeSpeed_cms	BA_ME_DCLC_Go_BoutSlopeSpeed_cms	750	10.3012	7.6648	12.0501	10.1989	11.0778	8.53018	10.9422	10.2127	7.81225	11.5856	6.10206	6.49967	6.83801	8.63886	6.83224	11.1475	8.98054	6.2795	0.010334	0.058213	0.005877	0.006987	0.005877	0.426493	455
BA_ME_DCLC_Go_BoutMeanAngle_deg	BA_ME_DCLC_Go_BoutMeanAngle_deg	751	25.4549	24.1086	24.3138	24.5662	26.1202	24.5735	22.2836	26.4127	26.5566	28.8124	23.9005	23.0667	22.0687	23.8838	27.1535	25.4325	20.3265	27.0366	0.139316	0.289	0.235371	0.044054	0.235371	0.078394	348
BA_ME_DCLC_Go_DC_BoutTotDur_ms	BA_ME_DCLC_Go_DC_BoutTotDur_ms	752	3.72358e+06	2.79877e+06	2.4245e+06	2.74379e+06	6446900	2.52889e+06	4301288	2.53792e+06	3110548	5694800	1.98044e+06	2.36657e+06	4014936	3665588	2.28153e+06	2905044	3600092	1.57599e+06	0.097436	0.229851	0.170968	0.034572	0.170968	0.411895	355
BA_ME_DCLC_Go_DC_BoutTotMove_cm	BA_ME_DCLC_Go_DC_BoutTotMove_cm	753	39114.6	21950.1	27068.7	29069.8	66150.3	21938.1	47502.6	27118.6	27305	66763.8	12558.8	17151.2	28629.2	28673.7	15776.1	32396.3	30739.3	9676.37	0.080264	0.197173	0.033425	0.012556	0.033425	0.83348	349
BA_ME_DCLC_Go_DC_BoutRate_onperms	BA_ME_DCLC_Go_DC_BoutRate_onperms	754	5.5e-05	2.7e-05	4e-05	3.5e-05	9.3e-05	3.2e-05	7.1e-05	4.5e-05	3e-05	9.5e-05	1.6e-05	2.1e-05	3e-05	4.2e-05	1.8e-05	4e-05	4.1e-05	1.3e-05	0.018959	0.076472	0.019644	0.009748	0.019644	1.00655	456
BA_ME_DCLC_Go_DC_BoutRate_onperactms	BA_ME_DCLC_Go_DC_BoutRate_onperactms	755	9.2e-05	5.3e-05	9e-05	8e-05	0.000126	6e-05	0.000104	7.7e-05	6.4e-05	0.000137	4.5e-05	5.2e-05	5e-05	6e-05	3.9e-05	8.6e-05	6e-05	2.8e-05	0.001476	0.026797	0.004348	0.006443	0.004348	0.806069	461
BA_ME_DCLC_Go_DC_BoutMeanNumber	BA_ME_DCLC_Go_DC_BoutMeanNumber	756	2388.87	1189.03	1728.67	1526.33	4026.33	1376.93	3059.73	1964	1317.67	4111.27	672.933	908.2	1286.8	1820.8	765.615	1734.93	1778.27	544.667	0.018959	0.076003	0.019648	0.009706	0.019648	1.00655	352
BA_ME_DCLC_Go_DC_BoutMeanDur_ms	BA_ME_DCLC_Go_DC_BoutMeanDur_ms	757	1635.22	2531.81	1402.53	1797.64	1601.18	1836.61	1405.77	1292.22	2360.65	1385.17	2942.99	2605.78	3120.09	2013.17	2980	1674.44	2024.5	2893.5	0.999068	0.765336	0.001676	0.006975	0.001676	-0.630683	712
BA_ME_DCLC_Go_DC_BoutMeanMove_cm	BA_ME_DCLC_Go_DC_BoutMeanMove_cm	758	16.6701	18.7343	15.6587	19.0455	16.4294	15.9326	15.5251	13.8078	20.7222	16.2392	18.6628	18.8848	22.2483	15.7478	20.6058	18.6729	17.2861	17.7657	0.958508	0.923788	0.068408	0.018927	0.068408	-0.16842	679
BA_ME_DCLC_Go_DC_BoutMeanSpeed_cms	BA_ME_DCLC_Go_DC_BoutMeanSpeed_cms	759	11.6089	9.23299	12.3259	12.2728	10.5301	9.94732	12.3771	11.6149	11.5269	12.2765	8.20198	9.86439	8.72651	8.67886	9.45607	11.8666	9.15709	7.91245	0.000932	0.024371	0.000662	0.011936	0.000662	0.330366	690
BA_ME_DCLC_Go_DC_BoutRatioSpeed_cms	BA_ME_DCLC_Go_DC_BoutRatioSpeed_cms	760	10.3658	7.66082	11.1646	10.5947	10.2608	8.67502	11.0438	10.6854	8.7782	11.7236	6.34144	7.24729	7.13067	7.82239	6.9147	11.1517	8.53846	6.13985	0.002331	0.033112	0.001511	0.006537	0.001511	0.436258	723
BA_ME_DCLC_Go_DC_BoutSlopeSpeed_cms	BA_ME_DCLC_Go_DC_BoutSlopeSpeed_cms	761	10.4354	7.88894	12.2072	10.4107	11.214	8.67955	10.7728	10.4293	8.04292	11.7269	6.25368	6.69935	7.42031	8.88275	6.95224	11.2663	9.14013	6.49674	0.010334	0.057716	0.006396	0.006919	0.006396	0.403585	687
BA_ME_DCLC_Go_DC_BoutMeanAngle_deg	BA_ME_DCLC_Go_DC_BoutMeanAngle_deg	762	25.8902	24.4641	24.7148	24.9812	26.5815	25.0049	22.5086	27.0108	27.0408	29.2792	24.298	23.3521	22.3522	23.9149	27.6626	26.1363	20.5242	27.4723	0.139316	0.288085	0.230875	0.04359	0.230875	0.081743	676
BA_ME_DCLC_Go_LC_BoutTotDur_ms	BA_ME_DCLC_Go_LC_BoutTotDur_ms	763	334771	369043	228377	237045	546138	312781	376988	284069	317095	375673	244072	320277	577179	507043	358069	313856	335274	296573	0.779099	0.915638	0.534632	0.077015	0.534632	-0.140615	546
BA_ME_DCLC_Go_LC_BoutTotMove_cm	BA_ME_DCLC_Go_LC_BoutTotMove_cm	764	2749.63	2294.29	2097.12	1837.79	4655.62	2254.93	3753.81	2307.73	2056.7	3033.34	1286.37	1836.75	3433.51	2876.3	2242.61	2709.01	2438.08	1531.69	0.220901	0.410074	0.311647	0.054204	0.311647	0.261191	640
BA_ME_DCLC_Go_LC_BoutRate_onperms	BA_ME_DCLC_Go_LC_BoutRate_onperms	765	6e-06	4e-06	4e-06	3e-06	9e-06	4e-06	7e-06	5e-06	3e-06	8e-06	2e-06	3e-06	5e-06	7e-06	3e-06	5e-06	4e-06	3e-06	0.052448	0.145836	0.125486	0.027876	0.125486	0.477523	541
BA_ME_DCLC_Go_LC_BoutRate_onperactms	BA_ME_DCLC_Go_LC_BoutRate_onperactms	766	5.7e-05	3.9e-05	5.7e-05	4.6e-05	7e-05	6.1e-05	6.6e-05	4.7e-05	3.9e-05	7.3e-05	3.6e-05	3.7e-05	2.2e-05	5.5e-05	3.3e-05	5.9e-05	4e-05	2.9e-05	0.005206	0.03507	0.010319	0.007974	0.010319	0.560296	626
BA_ME_DCLC_Go_LC_BoutMeanNumber	BA_ME_DCLC_Go_LC_BoutMeanNumber	767	202.364	145.347	157.2	121.733	329.111	154.067	256.333	197.733	117.733	285	73	111.8	173.6	258.4	115.846	196	139.533	94.6	0.052448	0.145218	0.12874	0.028193	0.12874	0.477446	525
BA_ME_DCLC_Go_LC_BoutMeanDur_ms	BA_ME_DCLC_Go_LC_BoutMeanDur_ms	768	1751.05	2715.65	1452.78	1947.25	1659.43	2030.16	1470.69	1436.63	2693.33	1318.15	3343.45	2864.73	3324.77	1962.24	3090.9	1601.3	2402.82	3135.02	0.997669	0.77517	0.004218	0.00671	0.004218	-0.633076	666
BA_ME_DCLC_Go_LC_BoutMeanMove_cm	BA_ME_DCLC_Go_LC_BoutMeanMove_cm	769	13.9559	16.4755	13.3405	15.0968	14.146	14.6361	14.6443	11.6709	17.4691	10.6433	17.6214	16.4289	19.7783	11.1312	19.3586	13.8215	17.4731	16.1912	0.975058	0.897385	0.064657	0.018359	0.064657	-0.23945	531
BA_ME_DCLC_Go_LC_BoutMeanSpeed_cms	BA_ME_DCLC_Go_LC_BoutMeanSpeed_cms	770	8.9714	7.35437	9.84088	8.76465	8.89123	8.14939	10.3969	8.86649	8.66881	8.1928	6.6501	7.56874	7.10743	5.56834	8.36636	9.41016	7.75779	6.40603	0.005206	0.034712	0.00646	0.00672	0.00646	0.286731	361
BA_ME_DCLC_Go_LC_BoutRatioSpeed_cms	BA_ME_DCLC_Go_LC_BoutRatioSpeed_cms	771	8.1639	6.24472	9.18271	7.7529	8.52462	7.20931	9.95738	8.12383	6.48607	8.07441	5.27044	5.73487	5.94878	5.67269	6.26308	8.63138	7.27189	5.16462	0.005206	0.034361	0.004304	0.006558	0.004304	0.386623	624
BA_ME_DCLC_Go_LC_BoutSlopeSpeed_cms	BA_ME_DCLC_Go_LC_BoutSlopeSpeed_cms	772	8.8996	6.13898	10.4807	8.10313	9.4103	7.51268	12.1336	8.71548	6.02055	8.82032	5.11868	5.25956	3.88485	6.57629	5.93982	9.29409	7.81942	5.21917	0.005206	0.034018	0.008078	0.007873	0.008078	0.53574	674
BA_ME_DCLC_Go_LC_BoutMeanAngle_deg	BA_ME_DCLC_Go_LC_BoutMeanAngle_deg	773	20.4683	21.2429	19.9037	19.3634	20.4757	20.7173	19.5976	20.4726	21.1374	22.0785	20.2361	20.7482	19.9676	23.6652	23.7887	19.2021	17.8075	24.5275	0.677312	0.854408	0.413927	0.066637	0.413927	-0.053589	673
BA_ME_DCLC_Go_BoutPerDur	BA_ME_DCLC_Go_BoutPerDur	774	5.07208	3.96243	3.34026	3.70256	8.69612	3.53963	5.82734	3.5344	4.29296	7.64337	2.78609	3.38302	5.78196	5.18291	3.30866	4.00952	4.90196	2.3453	0.117249	0.256239	0.215426	0.041617	0.215426	0.356193	623
BA_ME_DCLC_Go_BoutPerMove	BA_ME_DCLC_Go_BoutPerMove	775	75.8423	71.9584	75.8025	77.9935	78.7466	67.4322	77.2473	73.1803	78.2644	78.0719	68.5258	74.5116	80.1553	74.3832	69.8409	74.4021	72.3528	61.4953	0.06519	0.172462	0.123854	0.027914	0.123854	0.075841	672
BA_ME_DCLC_Go_DC_BoutPerDur	BA_ME_DCLC_Go_DC_BoutPerDur	776	8.18121	5.99588	5.3075	5.91822	15.0234	5.54522	8.36693	5.79933	6.20762	13.2814	4.19864	5.19878	8.63677	8.21875	4.83498	5.95223	7.67043	3.25644	0.117249	0.255385	0.173752	0.035004	0.173752	0.448342	665
BA_ME_DCLC_Go_DC_BoutPerMove	BA_ME_DCLC_Go_DC_BoutPerMove	777	76.5956	72.967	76.4925	79.0177	79.3505	67.6903	77.8172	74.18	79.0782	79.1382	69.3184	75.7408	81.7217	75.9671	70.5092	75.3102	73.2729	61.896	0.06519	0.171766	0.170726	0.034652	0.170726	0.070016	524
BA_ME_DCLC_Go_LC_BoutPerDur	BA_ME_DCLC_Go_LC_BoutPerDur	778	0.989589	1.11258	0.676859	0.694218	1.45624	0.901993	1.30567	0.787306	1.06641	1.02802	0.746971	0.944773	1.75249	1.4121	1.09869	0.997143	1.00542	0.943081	0.779099	0.913995	0.428378	0.068353	0.428378	-0.16901	530
BA_ME_DCLC_Go_LC_BoutPerMove	BA_ME_DCLC_Go_LC_BoutPerMove	779	66.4555	63.6357	67.8968	64.7238	71.0617	65.0204	70.6957	63.1753	68.8567	60.2135	61.6439	64.7057	69.1097	61.583	65.4751	65.0257	62.4635	59.0792	0.097436	0.229024	0.126397	0.027906	0.126397	0.062551	625
BA_ME_DCLC_Go_ActProb	BA_ME_DCLC_Go_ActProb	780	0.383604	0.313164	0.482449	0.276311	0.479573	0.271265	0.459646	0.456647	0.32606	0.316885	0.43084	0.212775	0.346771	0.257532	0.217562	0.421993	0.18103	0.436813	0.052448	0.144605	0.186325	0.037054	0.186325	0.292699	360
BA_ME_DCLC_Go_DC_ActProb	BA_ME_DCLC_Go_DC_ActProb	781	0.629506	0.489408	0.758364	0.443364	0.818566	0.443076	0.746207	0.740275	0.55692	0.529274	0.669885	0.345251	0.55963	0.40237	0.335964	0.595149	0.302697	0.704319	0.052448	0.143997	0.095774	0.022974	0.095774	0.363182	637
BA_ME_DCLC_Go_LC_ActProb	BA_ME_DCLC_Go_LC_ActProb	782	0.09503	0.105021	0.153211	0.076423	0.081319	0.071697	0.124693	0.126363	0.057905	0.06863	0.15126	0.056121	0.092073	0.084225	0.075887	0.214804	0.039707	0.126093	0.600777	0.8111	0.678234	0.09276	0.678234	-0.144224	639
BA_ME_DCLC_Stop_BoutTotDur_ms	BA_ME_DCLC_Stop_BoutTotDur_ms	783	7.59436e+07	7.67545e+07	7.67686e+07	7.75266e+07	7.34225e+07	77439773	7.56032e+07	7.70215e+07	7.64158e+07	7.3351e+07	7.76189e+07	7.67346e+07	7.48293e+07	7.63348e+07	7.71389e+07	7.70625e+07	7.63461e+07	7.79709e+07	0.808858	0.927265	0.258315	0.046888	0.258315	-0.015323	540
BA_ME_DCLC_Stop_BoutTotMove_cm	BA_ME_DCLC_Stop_BoutTotMove_cm	784	12808.2	8901.53	9310.27	8720.83	19110.3	11684.5	15097.2	10784.4	8154.36	19604	6359.16	6495.26	7938.03	10865.5	7780.96	12077.9	12677.6	7017.81	0.032479	0.101061	0.05405	0.0169	0.05405	0.524947	638
BA_ME_DCLC_Stop_BoutRate_onperms	BA_ME_DCLC_Stop_BoutRate_onperms	785	3.2e-05	1.7e-05	2.4e-05	2e-05	5.4e-05	1.9e-05	4.1e-05	2.7e-05	1.8e-05	5.5e-05	9e-06	1.3e-05	1.8e-05	2.6e-05	1.1e-05	2.4e-05	2.4e-05	8e-06	0.024942	0.086691	0.02181	0.01017	0.02181	0.957689	234
BA_ME_DCLC_Stop_BoutRate_onperactms	BA_ME_DCLC_Stop_BoutRate_onperactms	786	8.8e-05	5.1e-05	8.6e-05	7.6e-05	0.000119	6e-05	9.9e-05	7.2e-05	6.1e-05	0.000129	4.4e-05	5e-05	4.4e-05	5.9e-05	3.9e-05	8.3e-05	5.8e-05	2.8e-05	0.000932	0.023433	0.003988	0.006848	0.003988	0.797134	229
BA_ME_DCLC_Stop_BoutMeanNumber	BA_ME_DCLC_Stop_BoutMeanNumber	787	2592.21	1335.29	1886.87	1649.07	4356.44	1531.93	3317.07	2162.73	1436.33	4397.27	746.867	1021	1461.27	2080.13	882.385	1931.8	1918.67	640.2	0.024942	0.086233	0.021961	0.01011	0.021961	0.957032	259
BA_ME_DCLC_Stop_BoutMeanDur_ms	BA_ME_DCLC_Stop_BoutMeanDur_ms	788	35423.8	69485.4	40685.7	47012.4	16853.8	50550.4	22792.2	35613	53202	16681	103926	75156.3	51208.5	36697.1	87421	39891.6	39791.2	121791	0.981041	0.882992	0.017735	0.009739	0.017735	-0.97199	239
BA_ME_DCLC_Stop_BoutMeanMove_cm	BA_ME_DCLC_Stop_BoutMeanMove_cm	789	5.23873	7.27144	4.93425	5.28834	4.38666	7.62732	4.55138	4.98646	5.67721	4.45823	8.51445	6.36167	5.4323	5.22345	8.8181	6.25215	6.60752	10.9619	0.996503	0.798965	0.02267	0.010219	0.02267	-0.473024	244
BA_ME_DCLC_Stop_BoutMeanSpeed_cms	BA_ME_DCLC_Stop_BoutMeanSpeed_cms	790	0.952931	0.714578	1.00963	0.901297	1.10536	0.822118	1.02943	1.04151	0.619598	1.0945	0.556799	0.589532	0.622789	0.818973	0.545264	1.13731	0.918403	0.527552	0.024942	0.085779	0.028645	0.011351	0.028645	0.415279	284
BA_ME_DCLC_Stop_BoutRatioSpeed_cms	BA_ME_DCLC_Stop_BoutRatioSpeed_cms	791	0.169826	0.116082	0.121277	0.112488	0.260278	0.150886	0.199691	0.140018	0.10671	0.267263	0.081928	0.084646	0.106082	0.14234	0.100869	0.156729	0.166055	0.090006	0.032479	0.100582	0.056552	0.017137	0.056552	0.54892	274
BA_ME_DCLC_Stop_BoutSlopeSpeed_cms	BA_ME_DCLC_Stop_BoutSlopeSpeed_cms	792	0.014255	0.01783	0.00933	0.011378	0.01257	0.016759	0.022401	0.015018	0.013603	0.012984	0.012814	0.015589	0.021356	0.019216	0.019234	0.017504	0.02022	0.016709	0.975058	0.896122	0.055583	0.016986	0.055583	-0.32282	354
BA_ME_DCLC_Stop_BoutMeanAngle_deg	BA_ME_DCLC_Stop_BoutMeanAngle_deg	793	59.1253	60.8634	56.7054	58.7815	57.0064	61.3793	55.5392	58.6872	65.4161	59.4875	63.9911	61.4452	59.5703	54.7017	67.1683	58.2336	54.3453	67.4515	0.779099	0.912357	0.425083	0.068028	0.425083	-0.041798	270
BA_ME_DCLC_Stop_DC_BoutTotDur_ms	BA_ME_DCLC_Stop_DC_BoutTotDur_ms	794	4.2366e+07	4.40889e+07	4.32562e+07	43617988	3.64655e+07	43075924	4.71069e+07	4.12244e+07	46997964	37183136	4.51881e+07	4.31549e+07	4.24716e+07	4.09347e+07	4.49064e+07	45900916	4.33346e+07	46820212	0.747319	0.899317	0.288225	0.050373	0.288225	-0.05751	521
BA_ME_DCLC_Stop_DC_BoutTotMove_cm	BA_ME_DCLC_Stop_DC_BoutTotMove_cm	795	11441	7614.42	8318.7	7719.18	17214.4	10471.4	13541.2	9439.21	7224.13	17599.7	5558.76	5493.39	6403.34	9071.16	6598.43	10620.9	11212.5	5956.9	0.024942	0.08533	0.040039	0.013973	0.040039	0.587407	617
BA_ME_DCLC_Stop_DC_BoutRate_onperms	BA_ME_DCLC_Stop_DC_BoutRate_onperms	796	5.5e-05	2.7e-05	4e-05	3.5e-05	9.3e-05	3.2e-05	7.1e-05	4.5e-05	3e-05	9.5e-05	1.6e-05	2.1e-05	3e-05	4.2e-05	1.8e-05	4e-05	4.1e-05	1.3e-05	0.018959	0.075539	0.019637	0.009835	0.019637	1.00658	536
BA_ME_DCLC_Stop_DC_BoutRate_onperactms	BA_ME_DCLC_Stop_DC_BoutRate_onperactms	797	9.2e-05	5.3e-05	9e-05	8e-05	0.000126	6e-05	0.000104	7.7e-05	6.4e-05	0.000137	4.5e-05	5.2e-05	5e-05	6e-05	3.9e-05	8.6e-05	6e-05	2.8e-05	0.001476	0.026072	0.004345	0.006529	0.004345	0.806097	363
BA_ME_DCLC_Stop_DC_BoutMeanNumber	BA_ME_DCLC_Stop_DC_BoutMeanNumber	798	2388.82	1188.98	1728.67	1526.27	4026.11	1377	3059.8	1964	1317.67	4111.07	672.933	908.2	1286.8	1820.67	765.538	1734.87	1778.27	544.6	0.018959	0.075082	0.019642	0.009792	0.019642	1.00657	527
BA_ME_DCLC_Stop_DC_BoutMeanDur_ms	BA_ME_DCLC_Stop_DC_BoutMeanDur_ms	799	21879.8	45701.9	25022.9	28578.2	9057.25	31282.4	15395.4	20990	35667.6	9044.64	67151	47517	33005.6	22483.4	58659.9	26457.9	24369	85971.7	0.985936	0.855579	0.01858	0.009664	0.01858	-1.06266	628
BA_ME_DCLC_Stop_DC_BoutMeanMove_cm	BA_ME_DCLC_Stop_DC_BoutMeanMove_cm	800	5.09315	7.03155	4.81221	5.05756	4.27568	7.60453	4.42553	4.80612	5.48252	4.28106	8.26049	6.04866	4.97618	4.98233	8.61933	6.122	6.3053	10.9381	0.994794	0.8065	0.034626	0.012917	0.034626	-0.465285	533
BA_ME_DCLC_Stop_DC_BoutMeanSpeed_cms	BA_ME_DCLC_Stop_DC_BoutMeanSpeed_cms	801	0.96097	0.720102	1.01633	0.908588	1.11221	0.82839	1.03544	1.05616	0.624535	1.1061	0.558875	0.594898	0.632203	0.823458	0.550796	1.15049	0.92063	0.529468	0.024942	0.084885	0.02858	0.011367	0.02858	0.41629	668
BA_ME_DCLC_Stop_DC_BoutRatioSpeed_cms	BA_ME_DCLC_Stop_DC_BoutRatioSpeed_cms	802	0.27849	0.173372	0.192312	0.176972	0.472073	0.243093	0.287458	0.228972	0.153712	0.473325	0.123014	0.127295	0.150768	0.221601	0.146937	0.231387	0.258743	0.127229	0.018959	0.074629	0.049247	0.015763	0.049247	0.683756	543
BA_ME_DCLC_Stop_DC_BoutSlopeSpeed_cms	BA_ME_DCLC_Stop_DC_BoutSlopeSpeed_cms	803	0.026286	0.025981	0.017829	0.019073	0.023797	0.036157	0.028681	0.037162	0.017292	0.030295	0.019504	0.022614	0.025538	0.03246	0.028475	0.024163	0.03179	0.023304	0.560761	0.781289	0.926754	0.114582	0.926754	0.01683	642
BA_ME_DCLC_Stop_DC_BoutMeanAngle_deg	BA_ME_DCLC_Stop_DC_BoutMeanAngle_deg	804	59.5538	61.0243	57.1375	59.2302	57.396	61.9046	55.8721	59.2006	65.7831	59.9066	64.0736	61.5532	59.5138	54.7327	67.3048	58.9886	54.2786	67.7488	0.713131	0.882555	0.501614	0.074134	0.501614	-0.035189	867
BA_ME_DCLC_Stop_LC_BoutTotDur_ms	BA_ME_DCLC_Stop_LC_BoutTotDur_ms	805	3.35776e+07	3.26656e+07	3.35124e+07	3.39086e+07	36957048	34363849	2.84962e+07	3.57971e+07	2.94178e+07	3.61678e+07	3.24308e+07	3.35797e+07	3.23577e+07	3.54001e+07	3.22325e+07	3.11616e+07	3.30115e+07	3.11507e+07	0.117249	0.254537	0.458749	0.071822	0.458749	0.039729	864
BA_ME_DCLC_Stop_LC_BoutTotMove_cm	BA_ME_DCLC_Stop_LC_BoutTotMove_cm	806	1367.24	1287.11	991.569	1001.65	1895.89	1213.11	1556	1345.17	930.227	2004.3	800.403	1001.87	1534.69	1794.31	1182.53	1457.05	1465.12	1060.91	0.439239	0.676926	0.675749	0.092537	0.675749	0.087131	544
BA_ME_DCLC_Stop_LC_BoutRate_onperms	BA_ME_DCLC_Stop_LC_BoutRate_onperms	807	6e-06	4e-06	4e-06	3e-06	9e-06	4e-06	7e-06	5e-06	3e-06	8e-06	2e-06	3e-06	5e-06	7e-06	3e-06	5e-06	4e-06	3e-06	0.052448	0.143395	0.125334	0.027899	0.125334	0.475332	534
BA_ME_DCLC_Stop_LC_BoutRate_onperactms	BA_ME_DCLC_Stop_LC_BoutRate_onperactms	808	5.8e-05	3.9e-05	5.7e-05	4.6e-05	7e-05	6.1e-05	6.6e-05	4.7e-05	4e-05	7.4e-05	3.6e-05	3.7e-05	2.2e-05	5.5e-05	3.3e-05	5.9e-05	4e-05	2.9e-05	0.005206	0.033681	0.010217	0.007952	0.010217	0.557638	879
BA_ME_DCLC_Stop_LC_BoutMeanNumber	BA_ME_DCLC_Stop_LC_BoutMeanNumber	809	203.392	146.306	158.2	122.8	330.333	154.933	257.267	198.733	118.667	286.2	73.9333	112.8	174.467	259.467	116.846	196.933	140.4	95.6	0.052448	0.142797	0.128583	0.028216	0.128583	0.475274	882
BA_ME_DCLC_Stop_LC_BoutMeanDur_ms	BA_ME_DCLC_Stop_LC_BoutMeanDur_ms	810	185851	256662	211836	276129	111878	221798	110765	180126	247903	126373	438649	297692	185467	136434	275854	158234	235125	325844	0.947552	0.939559	0.113105	0.02609	0.113105	-0.465726	240
BA_ME_DCLC_Stop_LC_BoutMeanMove_cm	BA_ME_DCLC_Stop_LC_BoutMeanMove_cm	811	6.9566	9.30893	6.26782	8.15672	5.73934	7.82986	6.04821	6.76871	7.83899	7.00314	10.826	8.88181	8.79647	6.91537	10.1204	7.39869	10.4353	11.0974	0.997669	0.774249	0.002541	0.007233	0.002541	-0.420233	230
BA_ME_DCLC_Stop_LC_BoutMeanSpeed_cms	BA_ME_DCLC_Stop_LC_BoutMeanSpeed_cms	812	0.86033	0.670273	0.936386	0.810672	1.02186	0.766374	0.957955	0.896738	0.564772	0.92788	0.537904	0.546328	0.553356	0.787502	0.509021	1.02124	0.890194	0.516635	0.018959	0.074182	0.047213	0.015813	0.047213	0.360142	280
BA_ME_DCLC_Stop_LC_BoutRatioSpeed_cms	BA_ME_DCLC_Stop_LC_BoutRatioSpeed_cms	813	0.040619	0.039315	0.029588	0.02954	0.0513	0.035302	0.054604	0.037578	0.031621	0.055417	0.02468	0.029836	0.047429	0.050687	0.036687	0.046758	0.044382	0.034057	0.399223	0.628599	0.805126	0.104815	0.805126	0.047078	857
BA_ME_DCLC_Stop_LC_BoutSlopeSpeed_cms	BA_ME_DCLC_Stop_LC_BoutSlopeSpeed_cms	814	0.010421	0.013159	0.00624	0.008448	0.009478	0.01139	0.016719	0.010254	0.009833	0.011006	0.008559	0.012168	0.017934	0.015129	0.012732	0.01196	0.015453	0.011341	0.981041	0.881778	0.08541	0.021538	0.08541	-0.336593	860
BA_ME_DCLC_Stop_LC_BoutMeanAngle_deg	BA_ME_DCLC_Stop_LC_BoutMeanAngle_deg	815	54.2696	59.6363	51.9843	53.2045	52.2569	56.7103	51.5795	53.6134	61.3409	53.4673	63.24	60.5757	59.9867	54.4843	66.2737	51.583	55.1898	65.7575	0.981041	0.880567	0.031212	0.011889	0.031212	-0.136046	264
BA_ME_DCLC_Stop_BoutPerDur	BA_ME_DCLC_Stop_BoutPerDur	816	94.9279	96.0376	96.6597	96.2974	91.3039	96.4604	94.1727	96.4656	95.707	92.3566	97.2139	96.617	94.218	94.8171	96.6913	95.9905	95.098	97.6547	0.902564	0.952782	0.215426	0.041543	0.215426	-0.016766	249
BA_ME_DCLC_Stop_BoutPerMove	BA_ME_DCLC_Stop_BoutPerMove	817	24.1577	28.0416	24.1975	22.0065	21.2534	32.5678	22.7527	26.8197	21.7356	21.9281	31.4742	25.4884	19.8447	25.6168	30.1591	25.5979	27.6472	38.5047	0.947552	0.938136	0.123854	0.027856	0.123854	-0.215089	254
BA_ME_DCLC_Stop_DC_BoutPerDur	BA_ME_DCLC_Stop_DC_BoutPerDur	818	91.8188	94.0041	94.6925	94.0818	84.9766	94.4548	91.6331	94.2007	93.7924	86.7186	95.8014	94.8012	91.3632	91.7812	95.165	94.0478	92.3296	96.7436	0.902564	0.951246	0.173752	0.035069	0.173752	-0.033934	542
BA_ME_DCLC_Stop_DC_BoutPerMove	BA_ME_DCLC_Stop_DC_BoutPerMove	819	23.4044	27.033	23.5075	20.9823	20.6495	32.3097	22.1828	25.82	20.9218	20.8618	30.6816	24.2592	18.2783	24.0329	29.4908	24.6898	26.7271	38.104	0.947552	0.936716	0.170726	0.034587	0.170726	-0.207938	641
BA_ME_DCLC_Stop_LC_BoutPerDur	BA_ME_DCLC_Stop_LC_BoutPerDur	820	99.0104	98.8874	99.3231	99.3058	98.5438	99.098	98.6943	99.2127	98.9336	98.972	99.253	99.0552	98.2475	98.5879	98.9013	99.0029	98.9946	99.0569	0.252681	0.453604	0.428378	0.068454	0.428378	0.001793	636
BA_ME_DCLC_Stop_LC_BoutPerMove	BA_ME_DCLC_Stop_LC_BoutPerMove	821	33.5445	36.3643	32.1032	35.2762	28.9383	34.9796	29.3043	36.8247	31.1433	39.7865	38.3561	35.2943	30.8903	38.417	34.5249	34.9743	37.5365	40.9208	0.919736	0.944958	0.126397	0.027963	0.126397	-0.116445	359
BA_ME_DCLC_Other_BoutTotDur_ms	BA_ME_DCLC_Other_BoutTotDur_ms	822	1.97483e+07	1.64703e+07	1.46009e+07	1.47671e+07	2.44915e+07	1.58033e+07	2.47096e+07	2.34121e+07	1.62982e+07	2.39033e+07	8.39244e+06	1.33683e+07	2.34186e+07	25023209	1.32047e+07	1.33366e+07	2.30984e+07	1.192e+07	0.06519	0.171077	0.26072	0.047088	0.26072	0.26186	622
BA_ME_DCLC_Other_BoutTotMove_cm	BA_ME_DCLC_Other_BoutTotMove_cm	823	2749.17	1386.27	2202.11	1951.86	4515.2	1795.72	3170.48	2520.1	1559.18	4278.72	687.705	1105.5	1295.66	2217.1	829.493	2110.21	2173.31	671.15	0.010334	0.057227	0.011135	0.008308	0.011135	0.987793	664
BA_ME_DCLC_Other_BoutRate_onperms	BA_ME_DCLC_Other_BoutRate_onperms	824	3.4e-05	1.8e-05	2.5e-05	2.2e-05	5.6e-05	2.1e-05	4.3e-05	2.9e-05	1.9e-05	5.8e-05	1e-05	1.4e-05	2e-05	2.8e-05	1.2e-05	2.6e-05	2.6e-05	9e-06	0.024942	0.084445	0.022913	0.010159	0.022913	0.91186	523
BA_ME_DCLC_Other_BoutRate_onperactms	BA_ME_DCLC_Other_BoutRate_onperactms	825	9.3e-05	5.5e-05	9.2e-05	8e-05	0.000124	6.6e-05	0.000104	7.8e-05	6.5e-05	0.000135	4.9e-05	5.4e-05	4.8e-05	6.3e-05	4.2e-05	9e-05	6.4e-05	3.2e-05	0.000932	0.022566	0.004276	0.006704	0.004276	0.751065	627
BA_ME_DCLC_Other_BoutMeanNumber	BA_ME_DCLC_Other_BoutMeanNumber	826	2740.12	1457	2012.67	1744.93	4537.33	1685.93	3456.93	2339.4	1541.27	4602.53	836	1113	1597.33	2220.33	968.692	2111.73	2092.8	716.133	0.024942	0.08401	0.023072	0.010188	0.023072	0.911238	667
BA_ME_DCLC_Other_BoutMeanDur_ms	BA_ME_DCLC_Other_BoutMeanDur_ms	827	7926.55	11951.2	7254.52	8462.86	5397.78	9373.6	7147.84	10007.7	10574.5	5193.51	10038.8	12011.1	14661	11270	13631.5	6315.47	11037.1	16645	0.997669	0.773331	0.008665	0.007877	0.008665	-0.592397	526
BA_ME_DCLC_Other_BoutMeanMove_cm	BA_ME_DCLC_Other_BoutMeanMove_cm	828	1.02608	0.932099	1.09413	1.11859	0.995122	1.06512	0.917136	1.07724	1.01162	0.929645	0.822614	0.993257	0.811142	0.998542	0.856302	0.99928	1.03847	0.937185	0.032479	0.100108	0.039585	0.013859	0.039585	0.138581	532
BA_ME_DCLC_Other_BoutMeanSpeed_cms	BA_ME_DCLC_Other_BoutMeanSpeed_cms	829																									362
BA_ME_DCLC_Other_BoutRatioSpeed_cms	BA_ME_DCLC_Other_BoutRatioSpeed_cms	830	0.13645	0.085001	0.15082	0.132176	0.184358	0.11363	0.12831	0.107641	0.095666	0.179001	0.081943	0.082695	0.055326	0.088602	0.062818	0.158228	0.094089	0.056304	0.002331	0.032408	0.007301	0.007314	0.007301	0.682828	635
BA_ME_DCLC_Other_BoutSlopeSpeed_cms	BA_ME_DCLC_Other_BoutSlopeSpeed_cms	831	0.014183	0.007571	0.020191	0.014083	0.018231	0.012869	0.011478	0.009803	0.008016	0.018795	0.009615	0.005435	0.005164	0.010142	0.005217	0.012437	0.009272	0.003289	0.003497	0.025963	0.004302	0.006649	0.004302	0.905574	539
BA_ME_DCLC_Other_BoutMeanAngle_deg	BA_ME_DCLC_Other_BoutMeanAngle_deg	832																									529
BA_ME_DCLC_Other_DC_BoutTotDur_ms	BA_ME_DCLC_Other_DC_BoutTotDur_ms	833	1.72517e+07	1.38642e+07	1.26291e+07	1.30069e+07	2.10192e+07	1.40914e+07	2.19488e+07	2.03712e+07	1.42324e+07	2.07147e+07	7.37904e+06	1.12565e+07	1.76042e+07	2.17817e+07	1.11359e+07	1.12162e+07	20656605	9.88358e+06	0.052448	0.142205	0.177334	0.035331	0.177334	0.315372	663
BA_ME_DCLC_Other_DC_BoutTotMove_cm	BA_ME_DCLC_Other_DC_BoutTotMove_cm	834	2499.92	1225	1991.88	1771.38	4142.48	1610.41	2867.67	2261.17	1427.16	3927.18	622.563	982.593	1111.74	1919.37	721.698	1850.75	2016.97	574.302	0.010334	0.056746	0.009996	0.007894	0.009996	1.0291	522
BA_ME_DCLC_Other_DC_BoutRate_onperms	BA_ME_DCLC_Other_DC_BoutRate_onperms	835	5.8e-05	3e-05	4.3e-05	3.7e-05	9.7e-05	3.5e-05	7.4e-05	4.9e-05	3.3e-05	0.0001	1.7e-05	2.3e-05	3.2e-05	4.5e-05	1.9e-05	4.4e-05	4.5e-05	1.4e-05	0.018959	0.073741	0.020671	0.010028	0.020671	0.959121	621
BA_ME_DCLC_Other_DC_BoutRate_onperactms	BA_ME_DCLC_Other_DC_BoutRate_onperactms	836	9.7e-05	5.8e-05	9.6e-05	8.4e-05	0.000131	6.6e-05	0.000108	8.3e-05	6.9e-05	0.000143	5.1e-05	5.7e-05	5.4e-05	6.4e-05	4.3e-05	9.4e-05	6.6e-05	3.2e-05	0.000932	0.02176	0.004752	0.006947	0.004752	0.75803	358
BA_ME_DCLC_Other_DC_BoutMeanNumber	BA_ME_DCLC_Other_DC_BoutMeanNumber	837	2521.92	1297.21	1842.07	1611.27	4187.22	1516.47	3183.6	2115.33	1413.87	4305.53	755.533	990.533	1396.07	1946.53	840.923	1895.8	1939.67	612.6	0.018959	0.073305	0.020676	0.009986	0.020676	0.959113	872
BA_ME_DCLC_Other_DC_BoutMeanDur_ms	BA_ME_DCLC_Other_DC_BoutMeanDur_ms	838	7580.32	11359.1	6855.96	8072.49	5019.83	9292.26	6894.32	9630.25	10066.3	4811.18	9766.67	11364	12609.9	11190	13242.5	5916.36	10649.6	16133.8	0.997669	0.772414	0.009721	0.008216	0.009721	-0.583518	875
BA_ME_DCLC_Other_DC_BoutMeanMove_cm	BA_ME_DCLC_Other_DC_BoutMeanMove_cm	839	1.0154	0.926272	1.08133	1.09937	0.989315	1.06195	0.900763	1.06894	1.0094	0.912125	0.824005	0.991984	0.79634	0.986047	0.858221	0.976238	1.03986	0.937483	0.024942	0.083579	0.049626	0.015837	0.049626	0.13254	886
BA_ME_DCLC_Other_DC_BoutMeanSpeed_cms	BA_ME_DCLC_Other_DC_BoutMeanSpeed_cms	840																									889
BA_ME_DCLC_Other_DC_BoutRatioSpeed_cms	BA_ME_DCLC_Other_DC_BoutRatioSpeed_cms	841	0.142098	0.088562	0.157721	0.136188	0.197081	0.114283	0.130653	0.110998	0.100276	0.189584	0.084369	0.087291	0.063152	0.088119	0.064808	0.165007	0.097643	0.058107	0.002331	0.031733	0.008661	0.007941	0.008661	0.682127	266
BA_ME_DCLC_Other_DC_BoutSlopeSpeed_cms	BA_ME_DCLC_Other_DC_BoutSlopeSpeed_cms	842	0.015046	0.0078	0.021934	0.014225	0.021342	0.012904	0.011163	0.010007	0.008772	0.020017	0.009429	0.005487	0.005889	0.010276	0.005522	0.012928	0.009636	0.00323	0.005206	0.033351	0.005291	0.006896	0.005291	0.947816	241
BA_ME_DCLC_Other_DC_BoutMeanAngle_deg	BA_ME_DCLC_Other_DC_BoutMeanAngle_deg	843																									246
BA_ME_DCLC_Other_LC_BoutTotDur_ms	BA_ME_DCLC_Other_LC_BoutTotDur_ms	844	2.49655e+06	2.60606e+06	1971809	1.7602e+06	3.47235e+06	1.71185e+06	2.76084e+06	3.04091e+06	2.06583e+06	3.1886e+06	1.0134e+06	2111864	5.81435e+06	3.2415e+06	2.06883e+06	2.12034e+06	2.44178e+06	2.03645e+06	0.600777	0.809427	0.848644	0.109688	0.848644	-0.061938	560
BA_ME_DCLC_Other_LC_BoutTotMove_cm	BA_ME_DCLC_Other_LC_BoutTotMove_cm	845	249.255	161.266	210.231	180.478	372.721	185.314	302.812	258.934	132.015	351.536	65.1416	122.902	183.921	297.723	107.795	259.462	156.333	96.8477	0.024942	0.083153	0.055368	0.017017	0.055368	0.628183	251
BA_ME_DCLC_Other_LC_BoutRate_onperms	BA_ME_DCLC_Other_LC_BoutRate_onperms	846	6e-06	4e-06	5e-06	4e-06	9e-06	5e-06	7e-06	6e-06	3e-06	8e-06	2e-06	3e-06	6e-06	7e-06	3e-06	6e-06	4e-06	3e-06	0.052448	0.141617	0.133331	0.028906	0.133331	0.449126	832
BA_ME_DCLC_Other_LC_BoutRate_onperactms	BA_ME_DCLC_Other_LC_BoutRate_onperactms	847	6.2e-05	4.3e-05	6.2e-05	5e-05	7.5e-05	6.7e-05	7.1e-05	5.3e-05	4.3e-05	7.6e-05	3.9e-05	4e-05	2.6e-05	5.8e-05	3.6e-05	6.5e-05	4.4e-05	3.2e-05	0.005206	0.033027	0.00902	0.007933	0.00902	0.538484	840
BA_ME_DCLC_Other_LC_BoutMeanNumber	BA_ME_DCLC_Other_LC_BoutMeanNumber	848	218.206	159.796	170.6	133.667	350.111	169.467	273.333	224.067	127.4	297	80.4667	122.467	201.267	273.8	127.769	215.933	153.133	103.533	0.06519	0.170392	0.136369	0.029506	0.136369	0.449455	261
BA_ME_DCLC_Other_LC_BoutMeanDur_ms	BA_ME_DCLC_Other_LC_BoutMeanDur_ms	849	11921.2	16524.1	11558.1	13168.6	9917.85	10101.4	10100.6	13571.4	16215.3	10736	12594.1	17244.4	28888.8	11838.9	16191.9	9819.42	15945.5	19669.5	0.958508	0.922428	0.05905	0.017359	0.05905	-0.471043	843
BA_ME_DCLC_Other_LC_BoutMeanMove_cm	BA_ME_DCLC_Other_LC_BoutMeanMove_cm	850	1.15299	0.976983	1.2323	1.35021	1.06458	1.09351	1.10785	1.15561	1.03622	1.18362	0.809547	1.00356	0.913817	1.08737	0.843668	1.20158	1.0209	0.935425	0.005206	0.032709	0.009143	0.007976	0.009143	0.238972	554
BA_ME_DCLC_Other_LC_BoutMeanSpeed_cms	BA_ME_DCLC_Other_LC_BoutMeanSpeed_cms	851																									662
BA_ME_DCLC_Other_LC_BoutRatioSpeed_cms	BA_ME_DCLC_Other_LC_BoutRatioSpeed_cms	852	0.099216	0.066501	0.106618	0.102532	0.10734	0.108253	0.109681	0.08515	0.063904	0.110248	0.06428	0.058196	0.031632	0.091847	0.052104	0.122368	0.064024	0.047557	0.018959	0.072873	0.013524	0.008657	0.013524	0.577191	661
BA_ME_DCLC_Other_LC_BoutSlopeSpeed_cms	BA_ME_DCLC_Other_LC_BoutSlopeSpeed_cms	853	0.0111	0.006593	0.013609	0.012802	0.009951	0.012568	0.01329	0.008596	0.004695	0.013292	0.011047	0.005215	0.003654	0.0091	0.003535	0.00976	0.006821	0.003614	0.007382	0.043066	0.011462	0.008212	0.011462	0.751534	660
BA_ME_DCLC_Other_LC_BoutMeanAngle_deg	BA_ME_DCLC_Other_LC_BoutMeanAngle_deg	854																									659
BD_Chow_FullRsq	BD_Chow_FullRsq	855	0.899863	0.951405	0.858119	0.907536	0.951717	0.982143	0.809346	0.842165	0.921448	0.926427	0.952653	0.980529	0.966744	0.90031	0.994222	0.907788	0.949128	0.959862	0.967521	0.912292	0.047306	0.015747	0.047306	-0.080354	658
BD_Chow_ActProbRsq	BD_Chow_ActProbRsq	856	0.742967	0.793802	0.790591	0.811889	0.869351	0.949806	0.606619	0.680693	0.619718	0.615071	0.910405	0.786858	0.738609	0.762076	0.904532	0.513128	0.796105	0.938704	0.747319	0.897664	0.458969	0.071752	0.458969	-0.095481	657
BD_Chow_ActBtRateRsq	BD_Chow_ActBtRateRsq	857	0.045918	0.113753	0.042306	0.054543	0.019706	0.017156	0.051804	0.066121	0.054388	0.061321	0.024952	0.115536	0.207689	0.054936	0.074942	0.285335	0.138797	0.007832	0.958508	0.921071	0.066948	0.018861	0.066948	-1.30876	656
BD_Chow_BtSizeRsq	BD_Chow_BtSizeRsq	858	0.110977	0.04385	0.025222	0.041104	0.06266	0.015182	0.150923	0.095352	0.247342	0.250035	0.017296	0.078135	0.020447	0.083298	0.014748	0.109325	0.014226	0.013325	0.041492	0.119967	0.0869	0.021762	0.0869	1.33962	655
BD_Chow_ActProbPerRsq	BD_Chow_ActProbPerRsq	859	82.3836	83.2548	92.1307	89.4608	91.3455	96.7074	74.9517	80.8265	67.2548	66.3917	95.5652	80.2483	76.4017	84.6459	90.9789	56.5251	83.8775	97.7957	0.600777	0.807762	0.890656	0.112039	0.890656	-0.015175	654
BD_Chow_ActBtRatePerRsq	BD_Chow_ActBtRatePerRsq	860	5.19139	12.0496	4.9301	6.01002	2.07062	1.7468	6.40069	7.85128	5.90248	6.61913	2.61923	11.783	21.4833	6.10194	7.5378	31.4319	14.6237	0.815985	0.93481	0.939758	0.086636	0.021746	0.086636	-1.21479	653
BD_Chow_BtSizePerRsq	BD_Chow_BtSizePerRsq	861	12.425	4.69561	2.93918	4.52921	6.58384	1.54577	18.6476	11.3222	26.8428	26.9891	1.8156	7.96868	2.11501	9.25217	1.48333	12.043	1.49884	1.38827	0.041492	0.119438	0.073897	0.019788	0.073897	1.40386	652
BD_Water_FullRsq	BD_Water_FullRsq	862	0.955353	0.950981	0.954679	0.961288	0.945414	0.978368	0.97438	0.930697	0.970162	0.927841	0.912531	0.984943	0.951717	0.916346	0.969955	0.911317	0.980757	0.980282	0.520435	0.749061	0.749809	0.099043	0.749809	0.006618	651
BD_Water_ActProbRsq	BD_Water_ActProbRsq	863	0.715395	0.813497	0.682409	0.813102	0.636417	0.765777	0.702716	0.64613	0.66096	0.815645	0.70886	0.885452	0.924854	0.8169	0.640268	0.862785	0.923525	0.745331	0.981041	0.879359	0.04826	0.015585	0.04826	-0.185398	650
BD_Water_ActBtRateRsq	BD_Water_ActBtRateRsq	864	0.16377	0.109068	0.236223	0.0716	0.168672	0.207451	0.211175	0.042537	0.262817	0.109689	0.197999	0.071955	0.012412	0.076974	0.303676	0.024141	0.035259	0.150126	0.097436	0.228203	0.25172	0.046078	0.25172	0.586451	649
BD_Water_BtSizeRsq	BD_Water_BtSizeRsq	865	0.076188	0.028417	0.036047	0.076586	0.140325	0.005139	0.060489	0.24203	0.046386	0.002507	0.005672	0.027537	0.014451	0.022471	0.026011	0.024391	0.021972	0.084825	0.117249	0.253694	0.128021	0.02815	0.128021	1.42284	253
BD_Water_ActProbPerRsq	BD_Water_ActProbPerRsq	866	74.9041	85.5982	71.4805	84.5846	67.3163	78.2709	72.1193	69.4244	68.1288	87.9079	77.6806	89.8988	97.1774	89.1476	66.0101	94.6745	94.1645	76.0323	0.975058	0.894864	0.042497	0.014783	0.042497	-0.192537	276
BD_Water_ActBtRatePerRsq	BD_Water_ActBtRatePerRsq	867	17.049	11.4468	24.7437	7.44838	17.841	21.2038	21.6727	4.57044	27.09	11.822	21.6977	7.30547	1.30414	8.4001	31.3082	2.64899	3.59513	15.3146	0.117249	0.252857	0.256787	0.046689	0.256787	0.574743	851
BD_Water_BtSizePerRsq	BD_Water_BtSizePerRsq	868	8.04692	2.95497	3.77581	7.96702	14.8427	0.525304	6.20796	26.0052	4.78125	0.270147	0.621616	2.79577	1.51846	2.45229	2.68169	2.67651	2.24033	8.65313	0.117249	0.252025	0.129329	0.028265	0.129329	1.44529	550
BD_Go_FullRsq	BD_Go_FullRsq	869	0.967498	0.96347	0.978285	0.971624	0.980962	0.982777	0.943126	0.934476	0.964313	0.984417	0.984541	0.965364	0.985869	0.984024	0.976054	0.942005	0.975999	0.893908	0.639549	0.822653	0.761919	0.10052	0.761919	0.006018	271
BD_Go_ActProbRsq	BD_Go_ActProbRsq	870	0.762041	0.849647	0.7591	0.78772	0.954237	0.925515	0.723155	0.551765	0.649072	0.745767	0.885798	0.813398	0.792383	0.923271	0.953142	0.876815	0.707108	0.845263	0.919736	0.943474	0.130118	0.028323	0.130118	-0.156995	854
BD_Go_ActBtRateRsq	BD_Go_ActBtRateRsq	871	0.128336	0.048798	0.02683	0.110706	0.006683	0.052487	0.103292	0.303784	0.237203	0.1857	0.091475	0.011229	0.090082	0.059518	0.021875	0.062246	0.011598	0.042364	0.06519	0.169713	0.060648	0.017403	0.060648	1.39502	555
BD_Go_BtSizeRsq	BD_Go_BtSizeRsq	872	0.077121	0.065025	0.192355	0.073198	0.020042	0.004775	0.116679	0.078927	0.078039	0.052951	0.007268	0.140737	0.103404	0.001235	0.001037	0.002945	0.257293	0.006281	0.191142	0.372836	0.763343	0.100586	0.763343	0.246124	256
BD_Go_ActProbPerRsq	BD_Go_ActProbPerRsq	873	78.6131	88.2711	77.595	81.0725	97.2756	94.1735	76.6764	59.0454	67.3092	75.7572	89.9707	84.2582	80.3741	93.8261	97.6526	93.0796	72.4496	94.5582	0.93481	0.938315	0.095373	0.022928	0.095373	-0.167172	236
BD_Go_ActBtRatePerRsq	BD_Go_ActBtRatePerRsq	874	13.3851	5.05206	2.7426	11.3939	0.681293	5.34064	10.9521	32.5085	24.5981	18.864	9.2911	1.16317	9.13731	6.04845	2.24118	6.60778	1.18833	4.73917	0.06519	0.16904	0.062193	0.017753	0.062193	1.40569	250
BD_Go_BtSizePerRsq	BD_Go_BtSizePerRsq	875	8.00177	6.67681	19.6624	7.53355	2.04311	0.485881	12.3715	8.44613	8.0927	5.37887	0.738185	14.5787	10.4886	0.125486	0.106201	0.312608	26.362	0.702672	0.191142	0.371727	0.748111	0.09894	0.748111	0.261161	559
BD_Stop_FullRsq	BD_Stop_FullRsq	876	0.965412	0.962967	0.968438	0.969463	0.981324	0.982859	0.93782	0.939445	0.964084	0.979866	0.986809	0.959982	0.986064	0.984425	0.976631	0.941375	0.97521	0.893242	0.747319	0.896017	0.853509	0.110185	0.853509	0.003659	551
BD_Stop_ActProbRsq	BD_Stop_ActProbRsq	877	0.668759	0.751167	0.603067	0.628271	0.753733	0.883332	0.683643	0.5361	0.666617	0.595305	0.774034	0.61754	0.803768	0.728992	0.71068	0.742236	0.789467	0.842622	0.967521	0.910977	0.091226	0.022328	0.091226	-0.167649	263
BD_Stop_ActBtRateRsq	BD_Stop_ActBtRateRsq	878	0.134965	0.049656	0.111252	0.128608	0.010965	0.051885	0.086342	0.284373	0.197947	0.208345	0.067667	0.011776	0.094889	0.05877	0.038379	0.056634	0.026288	0.042849	0.024942	0.082731	0.022123	0.010099	0.022123	1.44253	557
BD_Stop_BtSizeRsq	BD_Stop_BtSizeRsq	879	0.161689	0.162143	0.254119	0.212584	0.216626	0.047642	0.167835	0.118973	0.099519	0.176217	0.145107	0.330665	0.087408	0.196663	0.227572	0.142505	0.159456	0.00777	0.439239	0.675333	0.991453	0.121608	0.991453	-0.004046	269
BD_Stop_ActProbPerRsq	BD_Stop_ActProbPerRsq	880	69.2027	78.1541	62.2722	64.8061	76.8078	89.8737	72.8971	57.0656	69.1451	60.7537	78.4382	64.3283	81.5127	74.0526	72.7685	78.8459	80.9535	94.3331	0.975058	0.893609	0.084691	0.021457	0.084691	-0.175494	558
BD_Stop_ActBtRatePerRsq	BD_Stop_ActBtRatePerRsq	881	14.0527	5.13941	11.4878	13.2659	1.11738	5.27901	9.20665	30.2703	20.5322	21.2626	6.85713	1.2267	9.62301	5.96994	3.92974	6.01612	2.69559	4.79705	0.024942	0.082313	0.022712	0.010195	0.022712	1.45118	279
BD_Stop_BtSizePerRsq	BD_Stop_BtSizePerRsq	882	16.7446	16.7065	26.2401	21.928	22.0749	4.84728	17.8963	12.6641	10.3227	17.9837	14.7047	34.445	8.8643	19.9775	23.3017	15.1379	16.3509	0.869892	0.439239	0.673748	0.993048	0.121666	0.993048	0.00329	286
BD_Other_FullRsq	BD_Other_FullRsq	883	0.963495	0.962585	0.968796	0.963921	0.981228	0.982906	0.93963	0.930486	0.960465	0.980531	0.985384	0.96526	0.985777	0.984175	0.977098	0.935189	0.974735	0.893063	0.779099	0.910724	0.947048	0.116294	0.947048	0.001364	552
BD_Other_ActProbRsq	BD_Other_ActProbRsq	884	0.731752	0.864325	0.70732	0.599797	0.898841	0.914925	0.784759	0.546929	0.688459	0.712988	0.901824	0.870177	0.9141	0.94946	0.877192	0.854751	0.703168	0.843929	0.967521	0.909666	0.025081	0.010767	0.025081	-0.240219	260
BD_Other_ActBtRateRsq	BD_Other_ActBtRateRsq	885	0.137928	0.042459	0.124063	0.080627	0.006555	0.067631	0.104815	0.291341	0.228952	0.199441	0.059383	0.061227	0.040284	0.025175	0.029743	0.066307	0.017383	0.040166	0.005206	0.032398	0.01393	0.008761	0.01393	1.69979	556
BD_Other_BtSizeRsq	BD_Other_BtSizeRsq	886	0.093815	0.055801	0.137413	0.283498	0.075831	0.000349	0.050056	0.092216	0.043054	0.068102	0.024176	0.033855	0.031393	0.00954	0.070162	0.014131	0.254183	0.008967	0.06519	0.168372	0.383109	0.062231	0.383109	0.749521	829
BD_Other_ActProbPerRsq	BD_Other_ActProbPerRsq	887	75.8267	89.8354	73.0103	62.2247	91.6037	93.0837	83.5179	58.7788	71.6798	72.7145	91.5201	90.1496	92.7289	96.4727	89.7752	91.3988	72.1394	94.4983	0.975058	0.892357	0.017303	0.009801	0.017303	-0.244578	281
BD_Other_ActBtRatePerRsq	BD_Other_ActBtRatePerRsq	888	14.4203	4.42864	12.8059	8.36446	0.668091	6.88076	11.155	31.3107	23.8376	20.3401	6.02643	6.34303	4.08648	2.55796	3.04406	7.09018	1.7834	4.49756	0.007382	0.042685	0.015162	0.009013	0.015162	1.70317	553
BD_Other_BtSizePerRsq	BD_Other_BtSizePerRsq	889	9.75303	5.73599	14.1839	29.4109	7.72819	0.035526	5.32718	9.9105	4.48264	6.94541	2.4535	3.5074	3.18464	0.969328	7.1807	1.51103	26.0772	1.0041	0.06519	0.167709	0.37169	0.060649	0.37169	0.765809	231

## Sheet: B. BALB
BEHAVIOR	link behavior	index	Avg Control	Avg Test	M1000	M1001	M1002	M1003	M1004	M1005	M1006	M1007	M1008	M1009	M1010	M1020	M1030	M1040	M1050	M1060	M1080	M1100	M1101	M1102	M1103	M1104	p (MW)	FDR (MW)	p (ttest)	FDR (ttest)	p (B)	B	Rank
AFL_avg_Chow_g	AFL_avg_Chow_g	1	4.23697	4.06524	4.10769	3.90769	4.31539	5.05	3.90769	4.15385	4.64615	3.96923	3.98889	4.32308	3.54615	4.3	4.90769	4.11667	4.23846	4.25385	4.26923	4.32308	3.27692	3.92	3.33846	4.29231	0.346186	0.003186	0.35892	0.29469	0.35892	0.059693	229
AFL_avg_DC_Chow_g	AFL_avg_DC_Chow_g	2	3.53517	3.22418	3.07368	3.21965	3.86859	4.29415	3.47136	3.38791	3.52079	3.70868	3.10556	3.70132	3.03571	3.89375	3.52356	3.67116	3.7597	2.75628	2.9325	3.53645	2.32247	3.45587	2.34725	3.45552	0.138302	0.001866	0.137979	0.192623	0.137979	0.132845	551
AFL_avg_LC_Chow_gkg	AFL_avg_LC_Chow_gkg	3	23.3152	24.8543	32.1922	27.9353	14.1728	24.5047	16.5213	27.041	34.8088	10.0463	26.3679	19.5612	15.9142	13.222	38.4376	13.5909	12.5841	42.6658	32.6351	23.1327	30.9587	15.3559	28.373	31.3814	0.408742	0.003574	0.710061	0.438033	0.710061	-0.092226	251
AFL_avg_Liquid_g	AFL_avg_Liquid_g	4	4.68239	4.06472	4.66923	4.46154	4.9	5.83333	4.67692	4.33077	4.44615	4.72308	4.14444	4.63846	3.74615	4.32727	5.6	4.19167	3.71538	3.93846	3.49231	4.68461	3.40769	3.95	3.26154	4.46154	0.006111	0.000357	0.02018	0.061416	0.02018	0.20409	255
AFL_avg_DC_Liquid_g	AFL_avg_DC_Liquid_g	5	4.07789	3.39734	3.53472	3.75865	4.53068	5.30831	4.20006	3.68731	3.60032	4.3616	3.71606	4.08118	3.46801	3.55021	4.29341	3.63963	3.42086	2.87007	2.68189	4.21016	2.60904	3.61211	2.84101	3.57167	0.0046	0.000322	0.00916	0.049197	0.00916	0.263417	246
AFL_avg_LC_Liquid_g	AFL_avg_LC_Liquid_g	6	0.604504	0.66738	1.13451	0.702889	0.369323	0.52502	0.476861	0.643463	0.845836	0.36148	0.428385	0.557276	0.278141	0.777064	1.30659	0.552038	0.294521	1.06839	0.810418	0.474458	0.798652	0.337886	0.420528	0.889865	0.460606	0.003826	0.619964	0.409573	0.619964	-0.142756	357
AFL_avg_Move_m	AFL_avg_Move_m	7	429.055	363.259	508.924	441.85	358.929	541.108	616.742	324.291	363.935	559.98	253.087	321.699	554.714	251.906	315.241	343.888	418.56	286.543	177.081	526.048	189.98	567.437	327.405	400.31	0.124267	0.001767	0.24579	0.25443	0.24579	0.240161	280
AFL_avg_DC_Move_m	AFL_avg_DC_Move_m	8	387.552	333.25	427.317	396.46	333.389	510.692	554.185	290.232	306.677	539.934	232.569	284.064	532.282	217.617	270.2	316.996	384.471	244.585	153.421	497.494	160.028	541.646	312.444	367.811	0.153381	0.001959	0.330641	0.278483	0.330641	0.217786	556
AFL_avg_LC_Move_m	AFL_avg_LC_Move_m	9	41.5027	30.0098	81.6074	45.3897	25.5405	30.4161	62.5573	34.0588	57.2584	20.0464	20.5173	37.6354	22.4328	34.2891	45.0409	26.8918	34.0891	41.9581	23.6594	28.5543	29.9521	25.7903	14.9609	32.4993	0.124267	0.001763	0.086313	0.153315	0.086313	0.467771	550
TBA_DCLC_MeanPerAct	TBA_DCLC_MeanPerAct	10	34.9939	31.7524	43.1848	34.3088	34.9398	41.814	39.4681	32.6843	30.5635	38.3302	21.575	33.0704	31.7656	20.2963	40.8918	30.8831	40.1997	38.666	20.1703	28.7947	28.6668	32.5566	33.295	34.8434	0.099258	0.001623	0.260197	0.247459	0.260197	0.140236	265
TBA_DCLC_MeanPerInact	TBA_DCLC_MeanPerInact	11	65.0061	68.2476	56.8152	65.6912	65.0602	58.186	60.5319	67.3157	69.4365	61.6698	78.425	66.9296	68.2344	79.7037	59.1082	69.1169	59.8003	61.334	79.8297	71.2053	71.3332	67.4434	66.705	65.1566	0.099258	0.001619	0.260197	0.246433	0.260197	-0.070202	269
TBA_DCLC_MeanPerStop	TBA_DCLC_MeanPerStop	12	22.9681	21.8808	31.8249	20.0493	21.276	30.9891	24.4322	20.3899	19.7782	21.2401	16.1765	23.5249	21.0263	11.8102	31.7409	17.8314	31.2668	30.7775	13.5704	21.0653	14.4485	20.1343	26.0879	22.8105	0.310464	0.002959	0.683223	0.430791	0.683223	0.069965	270
TBA_DCLC_MeanPerStopAtHomeBase	TBA_DCLC_MeanPerStopAtHomeBase	13	5.43138	10.4332	3.83197	4.81979	5.25905	7.37212	6.4608	4.83158	6.45919	5.36407	5.14153	4.77371	6.6112	4.76239	19.0403	5.54548	19.9807	19.1836	5.43404	9.64219	1.67195	6.96843	14.4561	11.9014	0.016057	0.000559	0.023648	0.067896	0.023648	-0.941785	244
TBA_DCLC_MeanPerLongStopAtHomeBase	TBA_DCLC_MeanPerLongStopAtHomeBase	14	2.85097	8.23614	1.88778	1.76119	3.09849	5.16894	3.31893	2.00391	3.13301	2.3899	3.20974	2.53785	4.43615	2.95847	16.8499	3.73077	17.5672	16.5574	4.12128	6.98474	1.04336	3.7969	12.8187	7.96884	0.003787	0.000311	0.011885	0.049322	0.011885	-1.53052	239
TBA_DCLC_MeanPerShortStopAtHomeBase	TBA_DCLC_MeanPerShortStopAtHomeBase	15	2.58041	2.19702	1.9442	3.05861	2.16056	2.20318	3.14187	2.82768	3.32619	2.97417	1.93179	2.23586	2.17505	1.80392	2.19044	1.81471	2.41352	2.62619	1.31276	2.65746	0.628585	3.17153	1.63742	3.9326	0.099258	0.001615	0.238053	0.248108	0.238053	0.232055	266
TBA_DCLC_MeanPerStopAtFeeder	TBA_DCLC_MeanPerStopAtFeeder	16	6.59073	3.82348	5.56067	6.39616	7.07542	13.6106	8.65389	6.42964	3.01704	5.59543	4.4275	5.14092	3.44722	1.49711	2.57274	5.19494	1.75293	5.8812	2.78762	3.35222	5.97099	3.64389	4.56324	5.21772	0.005565	0.000353	0.009457	0.048509	0.009457	0.785549	240
TBA_DCLC_MeanPerStopAtLickSpout	TBA_DCLC_MeanPerStopAtLickSpout	17	1.41037	1.21388	6.03518	0.417108	0.854147	0.681034	1.62287	0.454744	0.916561	0.463396	0.829684	1.82901	0.743824	0.910324	1.38831	0.742968	2.33919	1.03473	1.24407	1.30135	1.10336	1.57612	0.980388	1.20192	0.11126	0.001698	0.70171	0.435825	0.70171	0.216453	231
TBA_DCLC_MeanPerStopAtOther	TBA_DCLC_MeanPerStopAtOther	18	9.53563	6.41031	16.3971	8.4162	8.08743	9.32533	7.69464	8.67393	9.38544	9.81719	5.77781	11.7813	10.2241	4.64034	8.73953	6.34799	7.19395	4.67803	4.10467	6.76957	5.70223	7.94587	6.0881	4.48943	0.003787	0.000307	0.005974	0.041957	0.005974	0.572934	261
TBA_DCLC_MeanPerGo	TBA_DCLC_MeanPerGo	19	3.3696	3.07303	4.1049	3.33584	2.9479	3.61613	5.54717	2.62597	3.29707	4.35466	1.6602	2.20617	4.22516	1.72422	3.32975	2.86594	3.54183	3.22331	2.45465	2.89394	1.86593	5.2034	2.54281	3.00542	0.224139	0.002441	0.511938	0.368613	0.511938	0.132916	234
TBA_DCLC_MeanPerFeed	TBA_DCLC_MeanPerFeed	20	8.21369	6.39656	6.74263	10.4714	10.2968	6.71017	9.10019	9.21282	7.10369	12.3327	3.36174	6.80473	6.02752	6.41852	5.22547	9.93717	5.1107	4.33664	3.875	4.45954	11.6696	6.90618	4.30912	8.48325	0.040288	0.001023	0.106656	0.170837	0.106656	0.360734	286
TBA_DCLC_MeanPerDrink	TBA_DCLC_MeanPerDrink	21	0.442486	0.402007	0.512325	0.452302	0.418988	0.498629	0.388561	0.455632	0.384503	0.402783	0.376535	0.534602	0.486626	0.343339	0.595637	0.24859	0.280307	0.328558	0.270227	0.37594	0.682787	0.312706	0.355156	0.544216	0.068957	0.001438	0.406541	0.316162	0.406541	0.13841	284
TBA_DCLC_MeanPerAct_DC	TBA_DCLC_MeanPerAct_DC	22	57.8667	52.4252	63.9316	55.9934	60.1375	70.3427	66.4599	54.4925	45.9747	67.9901	38.6167	54.7283	54.8973	33.8504	63.8304	51.4739	69.8157	58.9031	32.6525	50.61	42.7003	55.6623	56.3651	58.3416	0.138302	0.001863	0.248576	0.256152	0.248576	0.142473	258
TBA_DCLC_MeanPerInact_DC	TBA_DCLC_MeanPerInact_DC	23	42.1333	47.5748	36.0684	44.0066	39.8625	29.6573	33.5401	45.5075	54.0253	32.0099	61.3833	45.2717	45.1027	66.1496	36.1696	48.5261	30.1843	41.0969	67.3475	49.39	57.2997	44.3377	43.6349	41.6584	0.138302	0.001859	0.248576	0.255575	0.248576	-0.175237	260
TBA_DCLC_MeanPerStop_DC	TBA_DCLC_MeanPerStop_DC	24	38.4642	36.9148	47.4985	33.4897	37.4023	51.6163	41.3426	35.5914	30.3394	37.8913	29.7678	39.7024	36.883	19.5548	50.668	29.7183	54.8027	47.8782	23.0892	37.5172	23.1394	35.0675	45.1527	39.507	0.35843	0.00328	0.71308	0.436943	0.71308	0.059314	263
TBA_DCLC_MeanPerStopAtHomeBase_DC	TBA_DCLC_MeanPerStopAtHomeBase_DC	25	8.40539	17.0584	5.8841	6.34161	8.54847	8.60096	11.1817	7.92971	9.00307	9.46616	9.32195	7.77613	11.3929	7.46123	29.8753	8.21457	34.9393	28.5538	8.88469	16.637	2.42038	11.728	24.309	20.2853	0.018899	0.000607	0.017296	0.056397	0.017296	-1.0211	553
TBA_DCLC_MeanPerLongStopAtHomeBase_DC	TBA_DCLC_MeanPerLongStopAtHomeBase_DC	26	4.3771	13.3863	2.89548	1.9108	5.19538	5.03684	6.05071	3.47496	4.57732	4.30042	5.9219	4.40722	7.67676	4.43702	26.4529	5.22887	30.9364	24.5269	6.79531	11.996	1.40474	6.35017	21.43	13.4001	0.002536	0.000277	0.010203	0.049027	0.010203	-1.61271	279
TBA_DCLC_MeanPerShortStopAtHomeBase_DC	TBA_DCLC_MeanPerShortStopAtHomeBase_DC	27	4.02829	3.67219	2.98863	4.43081	3.35309	3.56412	5.13103	4.45475	4.42575	5.16574	3.40006	3.36891	3.7161	3.02422	3.42238	2.98569	4.00289	4.02695	2.08938	4.64092	1.01564	5.37786	2.87902	6.88523	0.224139	0.002437	0.512752	0.368038	0.512752	0.133526	264
TBA_DCLC_MeanPerStopAtFeeder_DC	TBA_DCLC_MeanPerStopAtFeeder_DC	28	11.91	6.7919	9.62581	11.4737	12.8853	25.5557	15.429	11.721	5.07475	10.2433	8.31783	8.77377	6.23441	2.62734	4.34509	9.44967	3.08536	10.1819	4.8065	6.20688	10.5456	6.59935	8.17758	9.24314	0.003787	0.000304	0.010592	0.048355	0.010592	0.810287	832
TBA_DCLC_MeanPerStopAtLickSpout_DC	TBA_DCLC_MeanPerStopAtLickSpout_DC	29	2.27127	2.11361	9.00572	0.719592	1.51453	1.19795	2.81966	0.758333	1.52726	0.823722	1.42442	2.92154	1.34799	1.63859	2.31265	1.32557	4.25838	1.78665	2.2072	2.34624	1.58974	2.84056	1.60456	2.10512	0.088231	0.001578	0.837949	0.476964	0.837949	0.103796	354
TBA_DCLC_MeanPerStopAtOther_DC	TBA_DCLC_MeanPerStopAtOther_DC	30	15.8775	10.9509	22.9828	14.9549	14.454	16.2617	11.9122	15.1824	14.7343	17.3581	10.7036	20.2309	17.9078	7.82761	14.135	10.7285	12.5197	7.35575	7.19082	12.3271	8.58375	13.8996	11.0616	7.87346	0.003106	0.000295	0.00354	0.035127	0.00354	0.535936	250
TBA_DCLC_MeanPerGo_DC	TBA_DCLC_MeanPerGo_DC	31	5.80245	5.31397	6.37857	5.80973	5.18212	6.67871	9.27453	4.61462	5.32144	7.94137	3.04007	3.78333	7.61979	2.95533	5.36272	5.04571	6.08269	5.20419	4.00524	5.28438	3.13754	9.17239	4.61688	5.28075	0.244359	0.002532	0.53354	0.375288	0.53354	0.126872	274
TBA_DCLC_MeanPerFeed_DC	TBA_DCLC_MeanPerFeed_DC	32	12.9078	9.59366	9.39857	15.9882	16.8539	11.2056	15.2072	13.5961	9.75308	21.4919	5.19658	10.3869	9.55653	10.8246	6.97428	16.3094	8.45288	5.36264	5.17767	7.17914	15.5348	10.9201	6.07644	12.7556	0.053103	0.001235	0.080269	0.148353	0.080269	0.428088	557
TBA_DCLC_MeanPerDrink_DC	TBA_DCLC_MeanPerDrink_DC	33	0.692338	0.602753	0.655973	0.705832	0.699217	0.842108	0.635522	0.690365	0.560765	0.665614	0.61229	0.855698	0.837948	0.515689	0.825392	0.400425	0.477485	0.458036	0.380429	0.629304	0.888611	0.502266	0.519121	0.798328	0.060625	0.001354	0.180915	0.217337	0.180915	0.199911	552
TBA_DCLC_MeanPerAct_LC	TBA_DCLC_MeanPerAct_LC	34	8.56743	7.52376	19.0167	8.92753	5.35073	10.0868	7.70878	7.51965	12.5935	3.67261	3.10715	7.69095	4.75658	5.48645	13.9056	6.65277	5.86923	14.6626	5.47897	3.57097	11.787	4.28757	6.26123	7.5661	0.265523	0.002665	0.567503	0.388405	0.567503	0.18741	253
TBA_DCLC_MeanPerInact_LC	TBA_DCLC_MeanPerInact_LC	35	91.4326	92.4762	80.9833	91.0725	94.6493	89.9132	92.2912	92.4804	87.4065	96.3274	96.8929	92.3091	95.2434	94.5136	86.0944	93.3472	94.1308	85.3374	94.521	96.429	88.213	95.7124	93.7388	92.4339	0.265523	0.002661	0.567503	0.387244	0.567503	-0.016375	560
TBA_DCLC_MeanPerStop_LC	TBA_DCLC_MeanPerStop_LC	36	5.12499	4.26525	13.6878	4.32512	2.42202	7.97143	4.52263	2.84721	7.56101	1.8026	1.46987	4.64018	2.52471	3.32284	9.4709	3.82651	4.04319	10.4942	2.30954	2.05883	4.11859	1.87952	3.70993	3.42433	0.287578	0.002801	0.5434	0.378722	0.5434	0.264918	254
TBA_DCLC_MeanPerStopAtHomeBase_LC	TBA_DCLC_MeanPerStopAtHomeBase_LC	37	2.02152	2.64898	1.51111	3.02099	1.4714	5.97926	1.03835	1.20305	3.51239	0.620342	0.613858	1.24447	1.07298	1.78144	6.16543	2.37676	2.71335	7.98654	1.34594	1.54473	0.742366	1.12846	2.81443	2.11531	0.16951	0.002062	0.469425	0.349581	0.469425	-0.389995	851
TBA_DCLC_MeanPerLongStopAtHomeBase_LC	TBA_DCLC_MeanPerLongStopAtHomeBase_LC	38	1.12136	2.17026	0.744297	1.61675	0.715858	5.29891	0.200956	0.31506	1.51206	0.198707	0.288303	0.322751	0.674345	1.2912	5.46999	1.9718	2.13334	7.00168	0.934493	1.1384	0.582129	0.647064	2.59685	1.60184	0.022157	0.000667	0.195966	0.22309	0.195966	-0.952613	559
TBA_DCLC_MeanPerShortStopAtHomeBase_LC	TBA_DCLC_MeanPerShortStopAtHomeBase_LC	39	0.900156	0.478718	0.766812	1.40424	0.755539	0.680349	0.837391	0.887987	2.00033	0.421636	0.325554	0.921717	0.398637	0.490245	0.695441	0.404959	0.580008	0.984868	0.411452	0.406326	0.160237	0.481393	0.21758	0.513473	0.008048	0.000443	0.013222	0.052034	0.013222	0.910999	256
TBA_DCLC_MeanPerStopAtFeeder_LC	TBA_DCLC_MeanPerStopAtFeeder_LC	40	0.470651	0.352292	0.801973	0.411162	0.253624	0.236092	0.644447	0.356349	0.666802	0.183237	0.223775	0.929048	0.170244	0.256576	0.572312	0.148427	0.202156	0.770959	0.387885	0.094324	0.546847	0.166098	0.404549	0.50713	0.11126	0.001694	0.262192	0.244767	0.262192	0.417884	854
TBA_DCLC_MeanPerStopAtLickSpout_LC	TBA_DCLC_MeanPerStopAtLickSpout_LC	41	0.423467	0.152143	2.61611	0.063468	0.101326	0.121312	0.193802	0.116796	0.226243	0.041304	0.189384	0.564928	0.03207	0.122226	0.28171	0.046731	0.072346	0.191996	0.070246	0.042267	0.479992	0.06511	0.231472	0.189552	0.244359	0.002528	0.250407	0.252901	0.250407	1.47682	356
TBA_DCLC_MeanPerStopAtOther_LC	TBA_DCLC_MeanPerStopAtOther_LC	42	2.20935	1.11184	8.75864	0.8295	0.595669	1.63476	2.64603	1.17101	3.15558	0.957718	0.442856	1.90174	1.24941	1.1626	2.45144	1.25459	1.05533	1.54466	0.505469	0.377516	2.34939	0.519859	0.259475	0.612336	0.11126	0.00169	0.156013	0.205245	0.156013	0.990675	558
TBA_DCLC_MeanPerGo_LC	TBA_DCLC_MeanPerGo_LC	43	0.545565	0.445976	1.44827	0.432274	0.303655	0.236957	1.12223	0.340847	0.925642	0.133269	0.161645	0.350858	0.24962	0.383925	0.944539	0.306394	0.573106	0.920802	0.63737	0.132128	0.359158	0.337868	0.127571	0.379234	0.460606	0.003821	0.531464	0.374984	0.531464	0.290785	554
TBA_DCLC_MeanPerFeed_LC	TBA_DCLC_MeanPerFeed_LC	44	2.74053	2.64457	3.53033	4.01528	2.53614	1.75523	1.96303	4.14648	3.92208	1.63829	1.35262	2.54585	1.90583	1.62646	3.16219	2.45351	1.20163	3.07039	2.3865	1.29694	6.86884	1.98639	2.25636	3.51978	0.224139	0.002433	0.86836	0.48639	0.86836	0.051425	355
TBA_DCLC_MeanPerDrink_LC	TBA_DCLC_MeanPerDrink_LC	45	0.156346	0.167959	0.350278	0.154851	0.088925	0.123144	0.100893	0.185119	0.184736	0.098451	0.123004	0.154057	0.07642	0.153218	0.327978	0.066352	0.051311	0.177245	0.145558	0.083066	0.44044	0.083784	0.16738	0.242755	0.310464	0.002955	0.791667	0.462737	0.791667	-0.103368	843
TBA_DCLC_MeanPerActStop	TBA_DCLC_MeanPerActStop	46	65.8878	67.6358	73.6909	58.5403	60.9266	73.784	62.4468	62.6184	65.1549	55.4932	74.9413	71.282	66.1817	58.3355	76.8691	57.7314	77.6506	79.6788	67.0792	73.0666	49.8545	61.7735	78.0823	65.3267	0.265523	0.002657	0.637517	0.416945	0.637517	-0.037776	259
TBA_DCLC_MeanPerActStopAtHomeBase	TBA_DCLC_MeanPerActStopAtHomeBase	47	16.1997	30.8726	8.61957	14.0144	15.2171	17.4917	17.2418	15.2654	21.7738	14.1619	23.7204	14.4913	20.8085	23.3265	45.5571	18.213	49.5466	48.571	26.7425	33.616	5.72915	21.4044	42.7988	34.1583	0.002536	0.000272	0.004239	0.033948	0.004239	-0.930358	248
TBA_DCLC_MeanPerActLongStopAtHomeBase	TBA_DCLC_MeanPerActLongStopAtHomeBase	48	8.55448	23.8582	4.26291	5.10406	9.00223	12.1103	9.0748	6.49083	10.6177	6.35983	14.8316	7.69052	13.9418	14.3849	40.1205	12.3639	43.5286	41.5347	20.2818	24.2196	3.53575	11.6784	37.761	22.9469	0.001672	0.000253	0.002545	0.029787	0.002545	-1.47973	276
TBA_DCLC_MeanPerActShortStopAtHomeBase	TBA_DCLC_MeanPerActShortStopAtHomeBase	49	7.64526	7.01448	4.35666	8.91033	6.21491	5.3814	8.16704	8.77453	11.156	7.80211	8.88883	6.80078	6.86672	8.94153	5.43655	5.84912	6.01804	7.03628	6.46068	9.39638	2.1934	9.72595	5.03774	11.2114	0.38334	0.003437	0.522449	0.372073	0.522449	0.12423	236
TBA_DCLC_MeanPerActStopAtFeeder	TBA_DCLC_MeanPerActStopAtFeeder	50	18.5361	12.2766	12.8102	18.6453	20.0823	32.3513	21.6079	19.4345	9.8908	14.5538	20.4206	15.5647	10.868	7.38073	6.51413	16.6109	4.38531	15.2303	13.8491	11.6625	20.4662	11.3793	13.9407	15.0322	0.011457	0.000529	0.012619	0.050977	0.012619	0.594427	829
TBA_DCLC_MeanPerActStopAtLickSpout	TBA_DCLC_MeanPerActStopAtLickSpout	51	3.89954	3.88073	14.4573	1.21681	2.48928	1.65519	4.07367	1.4356	3.07429	1.20615	3.79995	5.58718	2.32487	4.44925	3.40538	2.40889	5.76093	2.82633	6.01553	4.3952	3.80804	4.86288	2.94292	3.36856	0.11126	0.001686	0.987737	0.517091	0.987737	0.006975	249
TBA_DCLC_MeanPerActStopAtOther	TBA_DCLC_MeanPerActStopAtOther	52	27.2524	20.6058	37.8038	24.6637	23.1378	22.2858	19.5234	26.483	30.416	25.5713	27.0003	35.6388	32.1803	23.1791	21.3925	20.4986	17.9577	13.0512	20.4721	23.3929	19.8511	24.1269	18.3999	12.7676	0.005565	0.000349	0.010015	0.049693	0.010015	0.403331	230
TBA_DCLC_MeanPerActGo	TBA_DCLC_MeanPerActGo	53	9.45347	9.82552	9.45429	9.73402	8.39412	8.73518	13.8457	7.9645	10.7586	11.3237	7.66104	6.66358	13.3293	8.54384	8.27877	9.23674	8.81945	8.71717	12.1696	10.0298	6.52255	15.9176	7.72371	8.61761	0.460606	0.003816	0.724023	0.440103	0.724023	-0.05569	555
TBA_DCLC_MeanPerActFeed	TBA_DCLC_MeanPerActFeed	54	23.3521	21.2251	15.6551	30.3997	29.468	16.2667	22.7181	28.0113	22.8161	32.1225	15.6199	20.4432	18.958	31.4045	13.3471	32.2234	12.8265	10.757	19.3938	15.5995	41.2384	21.3429	13.1186	24.4915	0.16951	0.002058	0.551924	0.381172	0.551924	0.137778	281
TBA_DCLC_MeanPerActDrink	TBA_DCLC_MeanPerActDrink	55	1.30665	1.31355	1.19978	1.32606	1.21126	1.21418	0.989425	1.40577	1.27037	1.06063	1.77778	1.61123	1.53097	1.71608	1.50501	0.808424	0.703472	0.847038	1.35739	1.30413	2.38448	0.966009	1.07539	1.56421	0.460606	0.003812	0.967201	0.510438	0.967201	-0.007599	241
TBA_DCLC_MeanPerActStop_DC	TBA_DCLC_MeanPerActStop_DC	56	66.9772	69.1732	74.3392	59.8293	62.2366	73.3096	62.7839	65.5086	66.2135	55.8385	77.055	72.6575	67.152	58.0574	78.2772	57.8133	78.2739	81.402	70.6081	74.0308	53.9583	62.9877	79.9112	67.607	0.224139	0.002429	0.551133	0.38178	0.551133	-0.046545	271
TBA_DCLC_MeanPerActStopAtHomeBase_DC	TBA_DCLC_MeanPerActStopAtHomeBase_DC	57	15.199	30.3898	8.85896	11.3369	14.4445	12.4013	17.5585	15.0511	20.0167	14.0255	24.0841	14.2121	20.702	21.9329	45.2568	16.2091	49.7289	47.1224	27.0051	32.9273	5.3743	21.0872	42.6358	34.6964	0.002063	0.000264	0.003589	0.034131	0.003589	-0.999617	660
TBA_DCLC_MeanPerActLongStopAtHomeBase_DC	TBA_DCLC_MeanPerActLongStopAtHomeBase_DC	58	8.00967	23.3755	4.34754	3.40646	8.83449	7.27493	9.68208	6.68591	10.1226	6.40183	15.2747	8.06612	13.9225	12.9587	39.9162	10.3995	44.0026	40.1428	20.5795	23.67	3.07143	11.4424	37.4132	22.9873	0.001349	0.00023	0.002734	0.029716	0.002734	-1.54518	840
TBA_DCLC_MeanPerActShortStopAtHomeBase_DC	TBA_DCLC_MeanPerActShortStopAtHomeBase_DC	59	7.18929	7.01434	4.51143	7.93046	5.61003	5.12637	7.87641	8.36514	9.89405	7.62365	8.8094	6.14598	6.77952	8.97424	5.34066	5.80956	5.72625	6.97957	6.42565	9.25729	2.30287	9.64479	5.2226	11.7091	0.48685	0.003884	0.854752	0.482319	0.854752	0.035542	875
TBA_DCLC_MeanPerActStopAtFeeder_DC	TBA_DCLC_MeanPerActStopAtFeeder_DC	60	20.06	13.4505	15.0042	20.5351	21.2561	36.0435	22.9476	21.2536	11.0712	15.0498	21.3976	16.0415	11.3928	7.82754	7.38201	18.2273	4.45642	17.7058	14.7898	12.1875	24.8545	11.9288	14.654	15.9998	0.011457	0.000526	0.020641	0.06199	0.020641	0.576661	872
TBA_DCLC_MeanPerActStopAtLickSpout_DC	TBA_DCLC_MeanPerActStopAtLickSpout_DC	61	3.98143	4.10247	15.056	1.2956	2.53661	1.72036	4.24301	1.41867	3.39559	1.20986	3.60306	5.33553	2.43952	4.79712	3.71063	2.5824	6.09474	3.17791	6.64825	4.60956	3.6611	5.09179	2.85784	3.5588	0.088231	0.001574	0.924599	0.497737	0.924599	-0.043206	539
TBA_DCLC_MeanPerActStopAtOther_DC	TBA_DCLC_MeanPerActStopAtOther_DC	62	27.7368	21.2304	35.4201	26.6617	23.9994	23.1444	18.0348	27.7852	31.73	25.5534	27.9703	37.0684	32.6177	23.4998	21.9277	20.7945	17.9939	13.3959	22.1649	24.3064	20.0683	24.8799	19.7636	13.352	0.005565	0.000346	0.011335	0.04836	0.011335	0.385668	635
TBA_DCLC_MeanPerActGo_DC	TBA_DCLC_MeanPerActGo_DC	63	9.85772	10.217	9.86462	10.3596	8.59505	9.53185	13.8184	8.39751	11.5693	11.6761	7.85406	6.91072	13.9153	8.81025	8.49688	9.77202	8.74999	9.12889	12.278	10.4301	7.27751	16.4448	8.27872	9.02194	0.434533	0.003692	0.733085	0.440335	0.733085	-0.051649	544
TBA_DCLC_MeanPerActFeed_DC	TBA_DCLC_MeanPerActFeed_DC	64	21.933	19.4093	14.7514	28.547	27.9948	15.9529	22.4371	24.813	20.9817	31.5031	13.4788	18.8704	17.4057	31.5882	11.8685	31.6296	12.2845	8.66432	15.94	14.2954	36.6993	19.6639	10.8814	21.9903	0.16951	0.002054	0.471694	0.348429	0.471694	0.17636	348
TBA_DCLC_MeanPerActDrink_DC	TBA_DCLC_MeanPerActDrink_DC	65	1.23209	1.20047	1.04474	1.26404	1.17355	1.20564	0.960644	1.28093	1.23554	0.982349	1.61209	1.56134	1.52704	1.54415	1.35744	0.785094	0.691526	0.804789	1.17396	1.24375	2.06491	0.903562	0.92867	1.38079	0.310464	0.002951	0.826619	0.474658	0.826619	0.037499	455
TBA_DCLC_MeanPerActStop_LC	TBA_DCLC_MeanPerActStop_LC	66	54.1602	53.6122	70.972	47.4745	44.6506	75.9901	57.7161	38.1597	61.1427	45.6552	41.2659	58.5753	52.2459	59.4735	69.7971	53.1586	67.7309	66.7278	41.1087	57.0388	36.3015	40.8001	55.7527	43.2107	0.38334	0.003433	0.916184	0.496722	0.916184	0.014672	349
TBA_DCLC_MeanPerActStopAtHomeBase_LC	TBA_DCLC_MeanPerActStopAtHomeBase_LC	67	23.0577	32.6438	8.21648	33.6616	26.9059	56.086	13.0995	16.5894	28.6422	15.497	15.6731	16.2055	21.5019	30.5114	47.468	31.8299	44.3315	49.4846	23.6134	42.57	8.41226	24.004	41.1698	26.8287	0.046341	0.001121	0.105482	0.170754	0.105482	-0.501561	456
TBA_DCLC_MeanPerActLongStopAtHomeBase_LC	TBA_DCLC_MeanPerActLongStopAtHomeBase_LC	68	11.7785	25.0217	4.08412	18.8935	12.9769	47.6836	2.20207	4.7304	12.238	4.36725	6.14361	4.46566	13.0294	21.2679	42.0862	24.8847	34.1862	42.0637	15.9876	30.0392	6.88209	12.6891	37.7528	19.3916	0.003787	0.0003	0.025569	0.069479	0.025569	-1.08702	352
TBA_DCLC_MeanPerActShortStopAtHomeBase_LC	TBA_DCLC_MeanPerActShortStopAtHomeBase_LC	69	11.2792	7.62208	4.13236	14.7681	13.929	8.40245	10.8974	11.859	16.4042	11.1298	9.52952	11.7398	8.47256	9.24346	5.38185	6.94519	10.1452	7.42092	7.62588	12.5307	1.53016	11.3149	3.41698	7.43717	0.009621	0.000496	0.017251	0.057483	0.017251	0.565404	461
TBA_DCLC_MeanPerActStopAtFeeder_LC	TBA_DCLC_MeanPerActStopAtFeeder_LC	70	5.79585	4.46156	4.45733	4.44688	4.90438	2.83208	8.4063	4.38428	4.70134	5.22552	7.17499	11.4254	3.48501	4.79378	3.62806	2.24716	3.51109	4.85717	7.04474	2.47638	4.34672	3.70024	6.85433	6.59406	0.060625	0.001349	0.149229	0.202748	0.149229	0.377472	350
TBA_DCLC_MeanPerActStopAtLickSpout_LC	TBA_DCLC_MeanPerActStopAtLickSpout_LC	71	3.75334	1.85328	12.3806	0.758831	1.81856	1.08382	2.74633	1.60879	1.74702	0.997813	6.45601	7.93557	0.696936	2.24404	1.61221	0.703343	1.33244	1.42372	1.30796	1.16305	4.08774	1.62593	3.71858	2.32336	0.186689	0.002168	0.119807	0.176997	0.119807	1.0181	653
TBA_DCLC_MeanPerActStopAtOther_LC	TBA_DCLC_MeanPerActStopAtOther_LC	72	21.5533	14.6536	45.9175	8.60718	11.0217	15.9882	33.464	15.5772	26.0521	23.9349	11.9618	23.0088	26.562	21.9243	17.0888	18.3783	18.5559	10.9623	9.14261	10.8294	19.4547	11.47	4.01	7.46456	0.078144	0.001547	0.094659	0.160045	0.094659	0.556659	651
TBA_DCLC_MeanPerActGo_LC	TBA_DCLC_MeanPerActGo_LC	73	5.9015	6.25469	7.82917	4.36447	5.33665	2.59767	14.0869	4.46575	7.21925	3.60878	5.07161	4.43475	5.23808	7.10538	6.71268	4.89656	10.0855	6.66953	11.8467	3.80261	3.30622	7.94903	2.20443	5.23955	0.310464	0.002947	0.78683	0.46109	0.78683	-0.083857	41
TBA_DCLC_MeanPerActFeed_LC	TBA_DCLC_MeanPerActFeed_LC	74	37.8055	37.8353	19.2844	46.3062	48.4185	19.8602	26.9118	54.879	30.1795	47.9879	49.3368	34.8904	40.8766	30.5794	21.2751	40.9039	21.2628	25.0669	44.2962	36.8098	56.3853	49.1164	39.3224	48.1289	0.51315	0.003965	0.995493	0.518181	0.995493	-0.001138	107
TBA_DCLC_MeanPerActDrink_LC	TBA_DCLC_MeanPerActDrink_LC	75	2.13283	2.29782	1.9145	1.85484	1.59429	1.55198	1.28523	2.49559	1.45853	2.74811	4.32566	2.09955	1.63938	2.84173	2.21516	1.04094	0.920841	1.53576	2.74835	2.34885	4.00702	2.13445	2.72052	3.42082	0.244359	0.002525	0.677125	0.429318	0.677125	-0.107497	42
TBA_APIP_MeanPerAct	TBA_APIP_MeanPerAct	76	34.9939	31.7524	43.1848	34.3088	34.9398	41.814	39.4681	32.6843	30.5635	38.3302	21.575	33.0704	31.7656	20.2963	40.8918	30.8831	40.1997	38.666	20.1703	28.7947	28.6668	32.5566	33.295	34.8434	0.099258	0.001611	0.260197	0.246945	0.260197	0.140236	108
TBA_APIP_MeanPerInact	TBA_APIP_MeanPerInact	77	65.0061	68.2476	56.8152	65.6912	65.0602	58.186	60.5319	67.3157	69.4365	61.6698	78.425	66.9296	68.2344	79.7037	59.1082	69.1169	59.8003	61.334	79.8297	71.2053	71.3332	67.4434	66.705	65.1566	0.099258	0.001607	0.260197	0.245922	0.260197	-0.070202	71
TBA_APIP_MeanPerStop	TBA_APIP_MeanPerStop	78	22.9681	21.8808	31.8249	20.0493	21.276	30.9891	24.4322	20.3899	19.7782	21.2401	16.1765	23.5249	21.0263	11.8102	31.7409	17.8314	31.2668	30.7775	13.5704	21.0653	14.4485	20.1343	26.0879	22.8105	0.310464	0.002943	0.683223	0.430196	0.683223	0.069965	137
TBA_APIP_MeanPerStopAtHomeBase	TBA_APIP_MeanPerStopAtHomeBase	79	5.43138	10.4332	3.83197	4.81979	5.25905	7.37212	6.4608	4.83158	6.45919	5.36407	5.14153	4.77371	6.6112	4.76239	19.0403	5.54548	19.9807	19.1836	5.43404	9.64219	1.67195	6.96843	14.4561	11.9014	0.016057	0.000556	0.023648	0.067472	0.023648	-0.941785	698
TBA_APIP_MeanPerLongStopAtHomeBase	TBA_APIP_MeanPerLongStopAtHomeBase	80	2.85097	8.23614	1.88778	1.76119	3.09849	5.16894	3.31893	2.00391	3.13301	2.3899	3.20974	2.53785	4.43615	2.95847	16.8499	3.73077	17.5672	16.5574	4.12128	6.98474	1.04336	3.7969	12.8187	7.96884	0.003787	0.000296	0.011885	0.048878	0.011885	-1.53052	697
TBA_APIP_MeanPerShortStopAtHomeBase	TBA_APIP_MeanPerShortStopAtHomeBase	81	2.58041	2.19702	1.9442	3.05861	2.16056	2.20318	3.14187	2.82768	3.32619	2.97417	1.93179	2.23586	2.17505	1.80392	2.19044	1.81471	2.41352	2.62619	1.31276	2.65746	0.628585	3.17153	1.63742	3.9326	0.099258	0.001603	0.238053	0.247543	0.238053	0.232055	699
TBA_APIP_MeanPerStopAtFeeder	TBA_APIP_MeanPerStopAtFeeder	82	6.59073	3.82348	5.56067	6.39616	7.07542	13.6106	8.65389	6.42964	3.01704	5.59543	4.4275	5.14092	3.44722	1.49711	2.57274	5.19494	1.75293	5.8812	2.78762	3.35222	5.97099	3.64389	4.56324	5.21772	0.005565	0.000343	0.009457	0.047971	0.009457	0.785549	701
TBA_APIP_MeanPerStopAtLickSpout	TBA_APIP_MeanPerStopAtLickSpout	83	1.41037	1.21388	6.03518	0.417108	0.854147	0.681034	1.62287	0.454744	0.916561	0.463396	0.829684	1.82901	0.743824	0.910324	1.38831	0.742968	2.33919	1.03473	1.24407	1.30135	1.10336	1.57612	0.980388	1.20192	0.11126	0.001682	0.70171	0.435233	0.70171	0.216453	734
TBA_APIP_MeanPerStopAtOther	TBA_APIP_MeanPerStopAtOther	84	9.53563	6.41031	16.3971	8.4162	8.08743	9.32533	7.69464	8.67393	9.38544	9.81719	5.77781	11.7813	10.2241	4.64034	8.73953	6.34799	7.19395	4.67803	4.10467	6.76957	5.70223	7.94587	6.0881	4.48943	0.003787	0.000293	0.005974	0.041321	0.005974	0.572934	868
TBA_APIP_MeanPerGo	TBA_APIP_MeanPerGo	85	3.3696	3.07303	4.1049	3.33584	2.9479	3.61613	5.54717	2.62597	3.29707	4.35466	1.6602	2.20617	4.22516	1.72422	3.32975	2.86594	3.54183	3.22331	2.45465	2.89394	1.86593	5.2034	2.54281	3.00542	0.224139	0.002425	0.511938	0.368033	0.511938	0.132916	865
TBA_APIP_MeanPerFeed	TBA_APIP_MeanPerFeed	86	8.21369	6.39656	6.74263	10.4714	10.2968	6.71017	9.10019	9.21282	7.10369	12.3327	3.36174	6.80473	6.02752	6.41852	5.22547	9.93717	5.1107	4.33664	3.875	4.45954	11.6696	6.90618	4.30912	8.48325	0.040288	0.001019	0.106656	0.17024	0.106656	0.360734	69
TBA_APIP_MeanPerDrink	TBA_APIP_MeanPerDrink	87	0.442486	0.402007	0.512325	0.452302	0.418988	0.498629	0.388561	0.455632	0.384503	0.402783	0.376535	0.534602	0.486626	0.343339	0.595637	0.24859	0.280307	0.328558	0.270227	0.37594	0.682787	0.312706	0.355156	0.544216	0.068957	0.001434	0.406541	0.315624	0.406541	0.13841	135
TBA_APIP_MeanPerAct_AP	TBA_APIP_MeanPerAct_AP	88	57.8667	52.4252	63.9316	55.9934	60.1375	70.3427	66.4599	54.4925	45.9747	67.9901	38.6167	54.7283	54.8973	33.8504	63.8304	51.4739	69.8157	58.9031	32.6525	50.61	42.7003	55.6623	56.3651	58.3416	0.138302	0.001855	0.248576	0.255001	0.248576	0.142473	105
TBA_APIP_MeanPerInact_AP	TBA_APIP_MeanPerInact_AP	89	42.1333	47.5748	36.0684	44.0066	39.8625	29.6573	33.5401	45.5075	54.0253	32.0099	61.3833	45.2717	45.1027	66.1496	36.1696	48.5261	30.1843	41.0969	67.3475	49.39	57.2997	44.3377	43.6349	41.6584	0.138302	0.001851	0.248576	0.254429	0.248576	-0.175237	39
TBA_APIP_MeanPerStop_AP	TBA_APIP_MeanPerStop_AP	90	38.4642	36.9148	47.4985	33.4897	37.4023	51.6163	41.3426	35.5914	30.3394	37.8913	29.7678	39.7024	36.883	19.5548	50.668	29.7183	54.8027	47.8782	23.0892	37.5172	23.1394	35.0675	45.1527	39.507	0.35843	0.003276	0.71308	0.436357	0.71308	0.059314	858
TBA_APIP_MeanPerStopAtHomeBase_AP	TBA_APIP_MeanPerStopAtHomeBase_AP	91	8.40539	17.0584	5.8841	6.34161	8.54847	8.60096	11.1817	7.92971	9.00307	9.46616	9.32195	7.77613	11.3929	7.46123	29.8753	8.21457	34.9393	28.5538	8.88469	16.637	2.42038	11.728	24.309	20.2853	0.018899	0.000605	0.017296	0.055997	0.017296	-1.0211	861
TBA_APIP_MeanPerLongStopAtHomeBase_AP	TBA_APIP_MeanPerLongStopAtHomeBase_AP	92	4.3771	13.3863	2.89548	1.9108	5.19538	5.03684	6.05071	3.47496	4.57732	4.30042	5.9219	4.40722	7.67676	4.43702	26.4529	5.22887	30.9364	24.5269	6.79531	11.996	1.40474	6.35017	21.43	13.4001	0.002536	0.000268	0.010203	0.048516	0.010203	-1.61271	640
TBA_APIP_MeanPerShortStopAtHomeBase_AP	TBA_APIP_MeanPerShortStopAtHomeBase_AP	93	4.02829	3.67219	2.98863	4.43081	3.35309	3.56412	5.13103	4.45475	4.42575	5.16574	3.40006	3.36891	3.7161	3.02422	3.42238	2.98569	4.00289	4.02695	2.08938	4.64092	1.01564	5.37786	2.87902	6.88523	0.224139	0.002421	0.512752	0.36746	0.512752	0.133526	541
TBA_APIP_MeanPerStopAtFeeder_AP	TBA_APIP_MeanPerStopAtFeeder_AP	94	11.91	6.7919	9.62581	11.4737	12.8853	25.5557	15.429	11.721	5.07475	10.2433	8.31783	8.77377	6.23441	2.62734	4.34509	9.44967	3.08536	10.1819	4.8065	6.20688	10.5456	6.59935	8.17758	9.24314	0.003787	0.00029	0.010592	0.047876	0.010592	0.810287	673
TBA_APIP_MeanPerStopAtLickSpout_AP	TBA_APIP_MeanPerStopAtLickSpout_AP	95	2.27127	2.11361	9.00572	0.719592	1.51453	1.19795	2.81966	0.758333	1.52726	0.823722	1.42442	2.92154	1.34799	1.63859	2.31265	1.32557	4.25838	1.78665	2.2072	2.34624	1.58974	2.84056	1.60456	2.10512	0.088231	0.00157	0.837949	0.47637	0.837949	0.103796	674
TBA_APIP_MeanPerStopAtOther_AP	TBA_APIP_MeanPerStopAtOther_AP	96	15.8775	10.9509	22.9828	14.9549	14.454	16.2617	11.9122	15.1824	14.7343	17.3581	10.7036	20.2309	17.9078	7.82761	14.135	10.7285	12.5197	7.35575	7.19082	12.3271	8.58375	13.8996	11.0616	7.87346	0.003106	0.000291	0.00354	0.03438	0.00354	0.535936	624
TBA_APIP_MeanPerGo_AP	TBA_APIP_MeanPerGo_AP	97	5.80245	5.31397	6.37857	5.80973	5.18212	6.67871	9.27453	4.61462	5.32144	7.94137	3.04007	3.78333	7.61979	2.95533	5.36272	5.04571	6.08269	5.20419	4.00524	5.28438	3.13754	9.17239	4.61688	5.28075	0.244359	0.002521	0.53354	0.374711	0.53354	0.126872	638
TBA_APIP_MeanPerFeed_AP	TBA_APIP_MeanPerFeed_AP	98	12.9078	9.59366	9.39857	15.9882	16.8539	11.2056	15.2072	13.5961	9.75308	21.4919	5.19658	10.3869	9.55653	10.8246	6.97428	16.3094	8.45288	5.36264	5.17767	7.17914	15.5348	10.9201	6.07644	12.7556	0.053103	0.001231	0.080269	0.147755	0.080269	0.428088	540
TBA_APIP_MeanPerDrink_AP	TBA_APIP_MeanPerDrink_AP	99	0.692338	0.602753	0.655973	0.705832	0.699217	0.842108	0.635522	0.690365	0.560765	0.665614	0.61229	0.855698	0.837948	0.515689	0.825392	0.400425	0.477485	0.458036	0.380429	0.629304	0.888611	0.502266	0.519121	0.798328	0.060625	0.001345	0.180915	0.216766	0.180915	0.199911	639
TBA_APIP_MeanPerAct_IP	TBA_APIP_MeanPerAct_IP	100	8.56743	7.52376	19.0167	8.92753	5.35073	10.0868	7.70878	7.51965	12.5935	3.67261	3.10715	7.69095	4.75658	5.48645	13.9056	6.65277	5.86923	14.6626	5.47897	3.57097	11.787	4.28757	6.26123	7.5661	0.265523	0.002653	0.567503	0.387823	0.567503	0.18741	637
TBA_APIP_MeanPerInact_IP	TBA_APIP_MeanPerInact_IP	101	91.4326	92.4762	80.9833	91.0725	94.6493	89.9132	92.2912	92.4804	87.4065	96.3274	96.8929	92.3091	95.2434	94.5136	86.0944	93.3472	94.1308	85.3374	94.521	96.429	88.213	95.7124	93.7388	92.4339	0.265523	0.002649	0.567503	0.386666	0.567503	-0.016375	360
TBA_APIP_MeanPerStop_IP	TBA_APIP_MeanPerStop_IP	102	5.12499	4.26525	13.6878	4.32512	2.42202	7.97143	4.52263	2.84721	7.56101	1.8026	1.46987	4.64018	2.52471	3.32284	9.4709	3.82651	4.04319	10.4942	2.30954	2.05883	4.11859	1.87952	3.70993	3.42433	0.287578	0.002797	0.5434	0.378145	0.5434	0.264918	530
TBA_APIP_MeanPerStopAtHomeBase_IP	TBA_APIP_MeanPerStopAtHomeBase_IP	103	2.02152	2.64898	1.51111	3.02099	1.4714	5.97926	1.03835	1.20305	3.51239	0.620342	0.613858	1.24447	1.07298	1.78144	6.16543	2.37676	2.71335	7.98654	1.34594	1.54473	0.742366	1.12846	2.81443	2.11531	0.16951	0.002051	0.469425	0.349012	0.469425	-0.389995	524
TBA_APIP_MeanPerLongStopAtHomeBase_IP	TBA_APIP_MeanPerLongStopAtHomeBase_IP	104	1.12136	2.17026	0.744297	1.61675	0.715858	5.29891	0.200956	0.31506	1.51206	0.198707	0.288303	0.322751	0.674345	1.2912	5.46999	1.9718	2.13334	7.00168	0.934493	1.1384	0.582129	0.647064	2.59685	1.60184	0.022157	0.000664	0.195966	0.222535	0.195966	-0.952613	665
TBA_APIP_MeanPerShortStopAtHomeBase_IP	TBA_APIP_MeanPerShortStopAtHomeBase_IP	105	0.900156	0.478718	0.766812	1.40424	0.755539	0.680349	0.837391	0.887987	2.00033	0.421636	0.325554	0.921717	0.398637	0.490245	0.695441	0.404959	0.580008	0.984868	0.411452	0.406326	0.160237	0.481393	0.21758	0.513473	0.008048	0.000439	0.013222	0.051589	0.013222	0.910999	625
TBA_APIP_MeanPerStopAtFeeder_IP	TBA_APIP_MeanPerStopAtFeeder_IP	106	0.470651	0.352292	0.801973	0.411162	0.253624	0.236092	0.644447	0.356349	0.666802	0.183237	0.223775	0.929048	0.170244	0.256576	0.572312	0.148427	0.202156	0.770959	0.387885	0.094324	0.546847	0.166098	0.404549	0.50713	0.11126	0.001679	0.262192	0.244267	0.262192	0.417884	672
TBA_APIP_MeanPerStopAtLickSpout_IP	TBA_APIP_MeanPerStopAtLickSpout_IP	107	0.423467	0.152143	2.61611	0.063468	0.101326	0.121312	0.193802	0.116796	0.226243	0.041304	0.189384	0.564928	0.03207	0.122226	0.28171	0.046731	0.072346	0.191996	0.070246	0.042267	0.479992	0.06511	0.231472	0.189552	0.244359	0.002517	0.250407	0.252342	0.250407	1.47682	623
TBA_APIP_MeanPerStopAtOther_IP	TBA_APIP_MeanPerStopAtOther_IP	108	2.20935	1.11184	8.75864	0.8295	0.595669	1.63476	2.64603	1.17101	3.15558	0.957718	0.442856	1.90174	1.24941	1.1626	2.45144	1.25459	1.05533	1.54466	0.505469	0.377516	2.34939	0.519859	0.259475	0.612336	0.11126	0.001675	0.156013	0.204656	0.156013	0.990675	204
TBA_APIP_MeanPerGo_IP	TBA_APIP_MeanPerGo_IP	109	0.545565	0.445976	1.44827	0.432274	0.303655	0.236957	1.12223	0.340847	0.925642	0.133269	0.161645	0.350858	0.24962	0.383925	0.944539	0.306394	0.573106	0.920802	0.63737	0.132128	0.359158	0.337868	0.127571	0.379234	0.460606	0.003807	0.531464	0.374405	0.531464	0.290785	156
TBA_APIP_MeanPerFeed_IP	TBA_APIP_MeanPerFeed_IP	110	2.74053	2.64457	3.53033	4.01528	2.53614	1.75523	1.96303	4.14648	3.92208	1.63829	1.35262	2.54585	1.90583	1.62646	3.16219	2.45351	1.20163	3.07039	2.3865	1.29694	6.86884	1.98639	2.25636	3.51978	0.224139	0.002417	0.86836	0.485794	0.86836	0.051425	172
TBA_APIP_MeanPerDrink_IP	TBA_APIP_MeanPerDrink_IP	111	0.156346	0.167959	0.350278	0.154851	0.088925	0.123144	0.100893	0.185119	0.184736	0.098451	0.123004	0.154057	0.07642	0.153218	0.327978	0.066352	0.051311	0.177245	0.145558	0.083066	0.44044	0.083784	0.16738	0.242755	0.310464	0.002938	0.791667	0.462145	0.791667	-0.103368	72
TBA_APIP_MeanPerActStop	TBA_APIP_MeanPerActStop	112	65.8878	67.6358	73.6909	58.5403	60.9266	73.784	62.4468	62.6184	65.1549	55.4932	74.9413	71.282	66.1817	58.3355	76.8691	57.7314	77.6506	79.6788	67.0792	73.0666	49.8545	61.7735	78.0823	65.3267	0.265523	0.002645	0.637517	0.416348	0.637517	-0.037776	138
TBA_APIP_MeanPerActStopAtHomeBase	TBA_APIP_MeanPerActStopAtHomeBase	113	16.1997	30.8726	8.61957	14.0144	15.2171	17.4917	17.2418	15.2654	21.7738	14.1619	23.7204	14.4913	20.8085	23.3265	45.5571	18.213	49.5466	48.571	26.7425	33.616	5.72915	21.4044	42.7988	34.1583	0.002536	0.000264	0.004239	0.033363	0.004239	-0.930358	40
TBA_APIP_MeanPerActLongStopAtHomeBase	TBA_APIP_MeanPerActLongStopAtHomeBase	114	8.55448	23.8582	4.26291	5.10406	9.00223	12.1103	9.0748	6.49083	10.6177	6.35983	14.8316	7.69052	13.9418	14.3849	40.1205	12.3639	43.5286	41.5347	20.2818	24.2196	3.53575	11.6784	37.761	22.9469	0.001672	0.000247	0.002545	0.029042	0.002545	-1.47973	106
TBA_APIP_MeanPerActShortStopAtHomeBase	TBA_APIP_MeanPerActShortStopAtHomeBase	115	7.64526	7.01448	4.35666	8.91033	6.21491	5.3814	8.16704	8.77453	11.156	7.80211	8.88883	6.80078	6.86672	8.94153	5.43655	5.84912	6.01804	7.03628	6.46068	9.39638	2.1934	9.72595	5.03774	11.2114	0.38334	0.003428	0.522449	0.371494	0.522449	0.12423	43
TBA_APIP_MeanPerActStopAtFeeder	TBA_APIP_MeanPerActStopAtFeeder	116	18.5361	12.2766	12.8102	18.6453	20.0823	32.3513	21.6079	19.4345	9.8908	14.5538	20.4206	15.5647	10.868	7.38073	6.51413	16.6109	4.38531	15.2303	13.8491	11.6625	20.4662	11.3793	13.9407	15.0322	0.011457	0.000522	0.012619	0.05053	0.012619	0.594427	109
TBA_APIP_MeanPerActStopAtLickSpout	TBA_APIP_MeanPerActStopAtLickSpout	117	3.89954	3.88073	14.4573	1.21681	2.48928	1.65519	4.07367	1.4356	3.07429	1.20615	3.79995	5.58718	2.32487	4.44925	3.40538	2.40889	5.76093	2.82633	6.01553	4.3952	3.80804	4.86288	2.94292	3.36856	0.11126	0.001671	0.987737	0.516499	0.987737	0.006975	212
TBA_APIP_MeanPerActStopAtOther	TBA_APIP_MeanPerActStopAtOther	118	27.2524	20.6058	37.8038	24.6637	23.1378	22.2858	19.5234	26.483	30.416	25.5713	27.0003	35.6388	32.1803	23.1791	21.3925	20.4986	17.9577	13.0512	20.4721	23.3929	19.8511	24.1269	18.3999	12.7676	0.005565	0.00034	0.010015	0.049159	0.010015	0.403331	180
TBA_APIP_MeanPerActGo	TBA_APIP_MeanPerActGo	119	9.45347	9.82552	9.45429	9.73402	8.39412	8.73518	13.8457	7.9645	10.7586	11.3237	7.66104	6.66358	13.3293	8.54384	8.27877	9.23674	8.81945	8.71717	12.1696	10.0298	6.52255	15.9176	7.72371	8.61761	0.460606	0.003802	0.724023	0.439518	0.724023	-0.05569	102
TBA_APIP_MeanPerActFeed	TBA_APIP_MeanPerActFeed	120	23.3521	21.2251	15.6551	30.3997	29.468	16.2667	22.7181	28.0113	22.8161	32.1225	15.6199	20.4432	18.958	31.4045	13.3471	32.2234	12.8265	10.757	19.3938	15.5995	41.2384	21.3429	13.1186	24.4915	0.16951	0.002047	0.551924	0.380596	0.551924	0.137778	36
TBA_APIP_MeanPerActDrink	TBA_APIP_MeanPerActDrink	121	1.30665	1.31355	1.19978	1.32606	1.21126	1.21418	0.989425	1.40577	1.27037	1.06063	1.77778	1.61123	1.53097	1.71608	1.50501	0.808424	0.703472	0.847038	1.35739	1.30413	2.38448	0.966009	1.07539	1.56421	0.460606	0.003798	0.967201	0.509849	0.967201	-0.007599	29
TBA_APIP_MeanPerActStop_AP	TBA_APIP_MeanPerActStop_AP	122	66.9772	69.1732	74.3392	59.8293	62.2366	73.3096	62.7839	65.5086	66.2135	55.8385	77.055	72.6575	67.152	58.0574	78.2772	57.8133	78.2739	81.402	70.6081	74.0308	53.9583	62.9877	79.9112	67.607	0.224139	0.002413	0.551133	0.381202	0.551133	-0.046545	95
TBA_APIP_MeanPerActStopAtHomeBase_AP	TBA_APIP_MeanPerActStopAtHomeBase_AP	123	15.199	30.3898	8.85896	11.3369	14.4445	12.4013	17.5585	15.0511	20.0167	14.0255	24.0841	14.2121	20.702	21.9329	45.2568	16.2091	49.7289	47.1224	27.0051	32.9273	5.3743	21.0872	42.6358	34.6964	0.002063	0.000259	0.003589	0.033435	0.003589	-0.999617	83
TBA_APIP_MeanPerActLongStopAtHomeBase_AP	TBA_APIP_MeanPerActLongStopAtHomeBase_AP	124	8.00967	23.3755	4.34754	3.40646	8.83449	7.27493	9.68208	6.68591	10.1226	6.40183	15.2747	8.06612	13.9225	12.9587	39.9162	10.3995	44.0026	40.1428	20.5795	23.67	3.07143	11.4424	37.4132	22.9873	0.001349	0.000224	0.002734	0.029025	0.002734	-1.54518	17
TBA_APIP_MeanPerActShortStopAtHomeBase_AP	TBA_APIP_MeanPerActShortStopAtHomeBase_AP	125	7.18929	7.01434	4.51143	7.93046	5.61003	5.12637	7.87641	8.36514	9.89405	7.62365	8.8094	6.14598	6.77952	8.97424	5.34066	5.80956	5.72625	6.97957	6.42565	9.25729	2.30287	9.64479	5.2226	11.7091	0.48685	0.003879	0.854752	0.481723	0.854752	0.035542	61
TBA_APIP_MeanPerActStopAtFeeder_AP	TBA_APIP_MeanPerActStopAtFeeder_AP	126	20.06	13.4505	15.0042	20.5351	21.2561	36.0435	22.9476	21.2536	11.0712	15.0498	21.3976	16.0415	11.3928	7.82754	7.38201	18.2273	4.45642	17.7058	14.7898	12.1875	24.8545	11.9288	14.654	15.9998	0.011457	0.000519	0.020641	0.061585	0.020641	0.576661	127
TBA_APIP_MeanPerActStopAtLickSpout_AP	TBA_APIP_MeanPerActStopAtLickSpout_AP	127	3.98143	4.10247	15.056	1.2956	2.53661	1.72036	4.24301	1.41867	3.39559	1.20986	3.60306	5.33553	2.43952	4.79712	3.71063	2.5824	6.09474	3.17791	6.64825	4.60956	3.6611	5.09179	2.85784	3.5588	0.088231	0.001565	0.924599	0.497151	0.924599	-0.043206	117
TBA_APIP_MeanPerActStopAtOther_AP	TBA_APIP_MeanPerActStopAtOther_AP	128	27.7368	21.2304	35.4201	26.6617	23.9994	23.1444	18.0348	27.7852	31.73	25.5534	27.9703	37.0684	32.6177	23.4998	21.9277	20.7945	17.9939	13.3959	22.1649	24.3064	20.0683	24.8799	19.7636	13.352	0.005565	0.000337	0.011335	0.047912	0.011335	0.385668	51
TBA_APIP_MeanPerActGo_AP	TBA_APIP_MeanPerActGo_AP	129	9.85772	10.217	9.86462	10.3596	8.59505	9.53185	13.8184	8.39751	11.5693	11.6761	7.85406	6.91072	13.9153	8.81025	8.49688	9.77202	8.74999	9.12889	12.278	10.4301	7.27751	16.4448	8.27872	9.02194	0.434533	0.003688	0.733085	0.439757	0.733085	-0.051649	549
TBA_APIP_MeanPerActFeed_AP	TBA_APIP_MeanPerActFeed_AP	130	21.933	19.4093	14.7514	28.547	27.9948	15.9529	22.4371	24.813	20.9817	31.5031	13.4788	18.8704	17.4057	31.5882	11.8685	31.6296	12.2845	8.66432	15.94	14.2954	36.6993	19.6639	10.8814	21.9903	0.16951	0.002043	0.471694	0.347866	0.471694	0.17636	646
TBA_APIP_MeanPerActDrink_AP	TBA_APIP_MeanPerActDrink_AP	131	1.23209	1.20047	1.04474	1.26404	1.17355	1.20564	0.960644	1.28093	1.23554	0.982349	1.61209	1.56134	1.52704	1.54415	1.35744	0.785094	0.691526	0.804789	1.17396	1.24375	2.06491	0.903562	0.92867	1.38079	0.310464	0.002934	0.826619	0.474062	0.826619	0.037499	364
TBA_APIP_MeanPerActStop_IP	TBA_APIP_MeanPerActStop_IP	132	54.1602	53.6122	70.972	47.4745	44.6506	75.9901	57.7161	38.1597	61.1427	45.6552	41.2659	58.5753	52.2459	59.4735	69.7971	53.1586	67.7309	66.7278	41.1087	57.0388	36.3015	40.8001	55.7527	43.2107	0.38334	0.003424	0.916184	0.496133	0.916184	0.014672	535
TBA_APIP_MeanPerActStopAtHomeBase_IP	TBA_APIP_MeanPerActStopAtHomeBase_IP	133	23.0577	32.6438	8.21648	33.6616	26.9059	56.086	13.0995	16.5894	28.6422	15.497	15.6731	16.2055	21.5019	30.5114	47.468	31.8299	44.3315	49.4846	23.6134	42.57	8.41226	24.004	41.1698	26.8287	0.046341	0.001117	0.105482	0.17015	0.105482	-0.501561	669
TBA_APIP_MeanPerActLongStopAtHomeBase_IP	TBA_APIP_MeanPerActLongStopAtHomeBase_IP	134	11.7785	25.0217	4.08412	18.8935	12.9769	47.6836	2.20207	4.7304	12.238	4.36725	6.14361	4.46566	13.0294	21.2679	42.0862	24.8847	34.1862	42.0637	15.9876	30.0392	6.88209	12.6891	37.7528	19.3916	0.003787	0.000286	0.025569	0.069068	0.025569	-1.08702	629
TBA_APIP_MeanPerActShortStopAtHomeBase_IP	TBA_APIP_MeanPerActShortStopAtHomeBase_IP	135	11.2792	7.62208	4.13236	14.7681	13.929	8.40245	10.8974	11.859	16.4042	11.1298	9.52952	11.7398	8.47256	9.24346	5.38185	6.94519	10.1452	7.42092	7.62588	12.5307	1.53016	11.3149	3.41698	7.43717	0.009621	0.000492	0.017251	0.057067	0.017251	0.565404	634
TBA_APIP_MeanPerActStopAtFeeder_IP	TBA_APIP_MeanPerActStopAtFeeder_IP	136	5.79585	4.46156	4.45733	4.44688	4.90438	2.83208	8.4063	4.38428	4.70134	5.22552	7.17499	11.4254	3.48501	4.79378	3.62806	2.24716	3.51109	4.85717	7.04474	2.47638	4.34672	3.70024	6.85433	6.59406	0.060625	0.00134	0.149229	0.202146	0.149229	0.377472	633
TBA_APIP_MeanPerActStopAtLickSpout_IP	TBA_APIP_MeanPerActStopAtLickSpout_IP	137	3.75334	1.85328	12.3806	0.758831	1.81856	1.08382	2.74633	1.60879	1.74702	0.997813	6.45601	7.93557	0.696936	2.24404	1.61221	0.703343	1.33244	1.42372	1.30796	1.16305	4.08774	1.62593	3.71858	2.32336	0.186689	0.002164	0.119807	0.176426	0.119807	1.0181	647
TBA_APIP_MeanPerActStopAtOther_IP	TBA_APIP_MeanPerActStopAtOther_IP	138	21.5533	14.6536	45.9175	8.60718	11.0217	15.9882	33.464	15.5772	26.0521	23.9349	11.9618	23.0088	26.562	21.9243	17.0888	18.3783	18.5559	10.9623	9.14261	10.8294	19.4547	11.47	4.01	7.46456	0.078144	0.001543	0.094659	0.159454	0.094659	0.556659	648
TBA_APIP_MeanPerActGo_IP	TBA_APIP_MeanPerActGo_IP	139	5.9015	6.25469	7.82917	4.36447	5.33665	2.59767	14.0869	4.46575	7.21925	3.60878	5.07161	4.43475	5.23808	7.10538	6.71268	4.89656	10.0855	6.66953	11.8467	3.80261	3.30622	7.94903	2.20443	5.23955	0.310464	0.00293	0.78683	0.460499	0.78683	-0.083857	545
TBA_APIP_MeanPerActFeed_IP	TBA_APIP_MeanPerActFeed_IP	140	37.8055	37.8353	19.2844	46.3062	48.4185	19.8602	26.9118	54.879	30.1795	47.9879	49.3368	34.8904	40.8766	30.5794	21.2751	40.9039	21.2628	25.0669	44.2962	36.8098	56.3853	49.1164	39.3224	48.1289	0.51315	0.003961	0.995493	0.51759	0.995493	-0.001138	643
TBA_APIP_MeanPerActDrink_IP	TBA_APIP_MeanPerActDrink_IP	141	2.13283	2.29782	1.9145	1.85484	1.59429	1.55198	1.28523	2.49559	1.45853	2.74811	4.32566	2.09955	1.63938	2.84173	2.21516	1.04094	0.920841	1.53576	2.74835	2.34885	4.00702	2.13445	2.72052	3.42082	0.244359	0.002513	0.677125	0.428722	0.677125	-0.107497	363
SA_DCLC_InactThresh_ms	SA_DCLC_InactThresh_ms	142	768237	740837	957746	906889	714509	1.74662e+06	453490	596124	614986	488942	465893	737172	531295	647074	1.1166e+06	1.08816e+06	729417	952403	446728	362217	900000	493836	922446	699868	0.434533	0.003683	0.843521	0.477753	0.843521	0.052395	533
SA_DCLC_MeanActPhaseOnsetCumCT_ms	SA_DCLC_MeanActPhaseOnsetCumCT_ms	143	4.32488e+07	4.29899e+07	4.30321e+07	4.34812e+07	4.31888e+07	41599040	4.36801e+07	4.34037e+07	4.36379e+07	4.34789e+07	43447133	4.35393e+07	4.33242e+07	4.28956e+07	4.2165e+07	4.30547e+07	4.30656e+07	4.17405e+07	4.36176e+07	4.33566e+07	4.32981e+07	43440661	42753211	4.31672e+07	0.030106	0.000814	0.306922	0.265864	0.306922	0.008662	527
SA_DCLC_MeanActPhaseOffsetCumCT_ms	SA_DCLC_MeanActPhaseOffsetCumCT_ms	144	8.40558e+07	8.20419e+07	8.54013e+07	8.39132e+07	8.50821e+07	8.50685e+07	8.34966e+07	83872092	8.25864e+07	8.37472e+07	82859753	8.45308e+07	8.14123e+07	7.92627e+07	8.33891e+07	82311317	8.22931e+07	8.252e+07	8.25042e+07	8.2063e+07	7.94393e+07	83646557	81680471	8.3981e+07	0.000692	0.00023	0.001343	0.020438	0.001343	0.034986	668
SA_DCLC_MeanActPhaseDur_ms	SA_DCLC_MeanActPhaseDur_ms	145	4.0807e+07	3.9052e+07	4.23692e+07	4.0432e+07	4.18932e+07	4.34694e+07	3.98165e+07	4.04684e+07	3.89485e+07	4.02683e+07	39412620	4.09915e+07	3.80881e+07	3.6367e+07	4.12241e+07	3.92566e+07	3.92274e+07	4.07796e+07	3.88865e+07	3.87063e+07	3.61412e+07	40205896	38927260	4.08138e+07	0.009621	0.000489	0.014278	0.05299	0.014278	0.06342	628
SA_DCLC_MeanInactPhaseDur_ms	SA_DCLC_MeanInactPhaseDur_ms	146	4.06468e+07	4.19584e+07	3.84681e+07	4.04053e+07	3.89441e+07	3.94108e+07	4.10531e+07	4.07728e+07	4.22926e+07	4.09728e+07	4.4069e+07	4.00789e+07	4.27492e+07	4.6647e+07	3.96133e+07	4.11521e+07	4.16422e+07	4.009e+07	41983076	4.25348e+07	4.51e+07	3.95895e+07	4.21431e+07	4.02566e+07	0.060625	0.001336	0.130207	0.185749	0.130207	-0.04582	534
SA_DCLC_MeanTotActDur_ms	SA_DCLC_MeanTotActDur_ms	147	2.82701e+07	2.55129e+07	3.46537e+07	2.75689e+07	2.80165e+07	3.43614e+07	3.16508e+07	2.64921e+07	2.4653e+07	3.08243e+07	1.7949e+07	2.65317e+07	2.54635e+07	1.68342e+07	3.28576e+07	2.4733e+07	3.23694e+07	30952999	1.61721e+07	2.32427e+07	2.30189e+07	2.56809e+07	2.66985e+07	2.81312e+07	0.11126	0.001667	0.227732	0.241207	0.227732	0.148051	45
SA_DCLC_MeanTotActMove_cm	SA_DCLC_MeanTotActMove_cm	148	41350.5	34567	50405.7	41822.7	34539.5	52677	60439	30726.8	35126.8	54387.3	23046.6	30333.1	53640	23397.6	30433.8	32450.2	40507.3	27705.7	16499	48554	17135.5	54723.7	31353.6	38403.9	0.138302	0.001848	0.228247	0.240635	0.228247	0.258506	111
SA_DCLC_MeanTotActChow_mg	SA_DCLC_MeanTotActChow_mg	149	4236.97	4065.24	4107.69	3907.69	4315.38	5050	3907.69	4153.85	4646.15	3969.23	3988.89	4323.08	3546.15	4300	4907.69	4116.67	4238.46	4253.85	4269.23	4323.08	3276.92	3920	3338.46	4292.31	0.346186	0.003181	0.35892	0.294161	0.35892	0.059693	589
SA_DCLC_MeanTotActLiquid_mg	SA_DCLC_MeanTotActLiquid_mg	150	4682.39	4064.72	4669.23	4461.54	4900	5833.33	4676.92	4330.77	4446.15	4723.08	4144.44	4638.46	3746.15	4327.27	5600	4191.67	3715.38	3938.46	3492.31	4684.62	3407.69	3950	3261.54	4461.54	0.006705	0.000388	0.02018	0.061009	0.02018	0.20409	439
SA_DCLC_MeanTotInactDur_ms	SA_DCLC_MeanTotInactDur_ms	151	5.31836e+07	5.54975e+07	4.61836e+07	5.32684e+07	5.28208e+07	4.85189e+07	49218808	5.4749e+07	5.65882e+07	5.04168e+07	6.55325e+07	5.45387e+07	5.53738e+07	6.61798e+07	4.79797e+07	5.56758e+07	4.85002e+07	4.99166e+07	6.46975e+07	5.79985e+07	5.82222e+07	5.41146e+07	5.43719e+07	5.29392e+07	0.16951	0.002039	0.343898	0.284918	0.343898	-0.061441	453
SA_DCLC_MeanTotInactMove_cm	SA_DCLC_MeanTotInactMove_cm	152	1555.09	1759.06	486.765	2362.42	1353.42	1433.86	1235.18	1702.38	1266.8	1611.07	2262.07	1836.91	1831.65	1793.23	1090.22	1938.89	1348.68	948.763	1209.02	4050.96	1862.79	2020.3	1386.99	1627.21	0.408742	0.003569	0.502662	0.364232	0.502662	-0.177806	379
SA_DCLC_MeanActNum	SA_DCLC_MeanActNum	153	9.69829	13.5244	9.84615	7.92308	8.38462	7.66667	9.15385	9.69231	9.76923	7	19.7778	7.76923	13.4615	12.7273	12.0769	10.75	13.3846	12.2308	21.2308	21.6923	8	13.2	10.4615	13.0769	0.001672	0.000242	0.031958	0.078015	0.031958	-0.479761	393
SA_DCLC_MeanActRate_onhr	SA_DCLC_MeanActRate_onhr	154	0.427575	0.603424	0.435857	0.354952	0.374681	0.332906	0.404782	0.433292	0.431001	0.310922	0.853634	0.343726	0.605053	0.553243	0.53051	0.482426	0.595648	0.54287	0.950064	0.979892	0.353033	0.602688	0.464035	0.58163	0.002063	0.000254	0.026801	0.070315	0.026801	-0.496994	432
SA_DCLC_MeanActDur_ms	SA_DCLC_MeanActDur_ms	155	3.22629e+06	2.04535e+06	3.51952e+06	3.47957e+06	3.34142e+06	4.48192e+06	3.45765e+06	2.73332e+06	2.52353e+06	4.40347e+06	907536	3.41497e+06	1.89158e+06	1.32269e+06	2.7207e+06	2.30074e+06	2.4184e+06	2.53075e+06	761731	1.07147e+06	2.87737e+06	1.94552e+06	2.55206e+06	2.15121e+06	0.002063	0.00025	0.003941	0.032715	0.003941	0.657528	472
SA_DCLC_MeanActMove_cm	SA_DCLC_MeanActMove_cm	156	4759.58	2657.52	5119.33	5278.6	4119.39	6870.91	6602.58	3170.22	3595.66	7769.62	1165.28	3904.26	3984.69	1838.38	2520	3018.62	3026.41	2265.25	777.129	2238.31	2141.94	4145.73	2997.04	2936.77	0.003106	0.000287	0.003653	0.033349	0.003653	0.840754	331
SA_DCLC_MeanActChow_mg	SA_DCLC_MeanActChow_mg	157	473.997	317.449	417.188	493.204	514.679	658.696	426.891	428.571	475.591	567.033	201.685	556.436	263.429	337.857	406.369	382.946	316.667	347.799	201.087	199.291	409.615	296.97	319.118	328.235	0.000549	0.000609	0.001152	0.019481	0.001152	0.578356	341
SA_DCLC_MeanActLiquid_mg	SA_DCLC_MeanActLiquid_mg	158	527.677	319.175	474.219	563.107	584.404	760.87	510.924	446.825	455.118	674.725	209.551	597.03	278.286	340	463.694	389.922	277.586	322.013	164.493	215.957	425.962	299.242	311.765	341.176	0.001084	0.000233	0.000519	0.014821	0.000519	0.725309	446
SA_DCLC_MeanInactNum	SA_DCLC_MeanInactNum	159	10.1932	14.0573	10.2308	8	9.23077	8	9.61538	10.2308	9.61538	7.84615	20.7778	8.38462	14.2308	13.3636	12.1538	11.4167	14.2308	12.6154	22.1538	22.3846	8.07692	13.6	11.0769	13.3846	0.002062	0.000269	0.036819	0.085319	0.036819	-0.463721	375
SA_DCLC_MeanInactRate_onhr	SA_DCLC_MeanInactRate_onhr	160	0.449475	0.627356	0.454362	0.357468	0.411983	0.347283	0.425339	0.457996	0.424056	0.349049	0.89686	0.370352	0.639364	0.580523	0.534241	0.512989	0.633778	0.560201	0.991083	1.01113	0.356239	0.621222	0.491735	0.595763	0.002536	0.00026	0.030796	0.077671	0.030796	-0.481044	421
SA_DCLC_MeanInactDur_ms	SA_DCLC_MeanInactDur_ms	161	5.53995e+06	4.21628e+06	4.51418e+06	6.65856e+06	5.72225e+06	6.06486e+06	5.11876e+06	5.35141e+06	5.88517e+06	6.42568e+06	3.15397e+06	6.50462e+06	3.89113e+06	4.95223e+06	3.94769e+06	4.87671e+06	3.40812e+06	3.95681e+06	2.92037e+06	2.591e+06	7.20847e+06	3.97901e+06	4.90858e+06	3.95523e+06	0.006705	0.000385	0.013603	0.052184	0.013603	0.393901	293
SA_DCLC_MeanInactMove_cm	SA_DCLC_MeanInactMove_cm	162	162.862	129.494	47.5785	295.302	146.621	179.232	128.459	166.398	131.747	205.333	108.87	219.081	128.71	134.187	89.7012	169.83	94.7722	75.2069	54.5738	180.971	230.631	148.552	125.214	121.573	0.124267	0.001759	0.195523	0.224263	0.195523	0.330772	303
SA_DCLC_DC_MeanTotActDur_ms	SA_DCLC_DC_MeanTotActDur_ms	163	2.5036e+07	2.26824e+07	2.76568e+07	2.42228e+07	2.60155e+07	3.04303e+07	2.87505e+07	2.35745e+07	1.98897e+07	2.94141e+07	1.67144e+07	2.36916e+07	2.37486e+07	1.46437e+07	27613048	2.22676e+07	3.02023e+07	2.54815e+07	1.41255e+07	2.18951e+07	1.84735e+07	2.40813e+07	2.44003e+07	2.52566e+07	0.138302	0.001844	0.248628	0.25222	0.248628	0.142431	389
SA_DCLC_DC_MeanTotActMove_cm	SA_DCLC_DC_MeanTotActMove_cm	164	38051.8	32382.9	42521.4	38524.2	32799.4	50588.6	54956.7	28121.2	30038.8	53341.5	21939	27687	52240.2	20819.8	26603.5	30668	37814.9	24002.7	14607.2	47333.2	15161.4	52864.7	30582.1	35897	0.138302	0.00184	0.306964	0.265397	0.306964	0.232733	452
SA_DCLC_DC_MeanTotActChow_mg	SA_DCLC_DC_MeanTotActChow_mg	165	3535.17	3224.18	3073.68	3219.65	3868.59	4294.15	3471.36	3387.91	3520.79	3708.68	3105.56	3701.32	3035.71	3893.75	3523.56	3671.16	3759.7	2756.28	2932.5	3536.45	2322.47	3455.87	2347.25	3455.52	0.138302	0.001837	0.137979	0.192036	0.137979	0.132845	347
SA_DCLC_DC_MeanTotActLiquid_mg	SA_DCLC_DC_MeanTotActLiquid_mg	166	4077.89	3397.34	3534.73	3758.65	4530.68	5308.31	4200.06	3687.31	3600.32	4361.6	3716.06	4081.19	3468.01	3550.21	4293.41	3639.63	3420.86	2870.07	2681.89	4210.16	2609.04	3612.11	2841.01	3571.67	0.0046	0.000319	0.00916	0.049782	0.00916	0.263417	438
SA_DCLC_DC_MeanTotInactDur_ms	SA_DCLC_DC_MeanTotInactDur_ms	167	1.823e+07	2.05832e+07	1.56032e+07	1.90372e+07	1.72445e+07	1.28297e+07	1.45095e+07	1.96878e+07	2.33726e+07	1.38482e+07	2.65689e+07	1.95984e+07	1.95114e+07	2.86163e+07	15646952	2.09924e+07	1.30577e+07	1.77785e+07	2.91345e+07	2.13672e+07	2.47888e+07	1.91817e+07	1.88897e+07	1.80334e+07	0.138302	0.001833	0.248832	0.251867	0.248832	-0.175153	337
SA_DCLC_DC_MeanTotInactMove_cm	SA_DCLC_DC_MeanTotInactMove_cm	168	702.834	941.528	209.419	1121.35	538.722	479.376	461.526	901.542	628.466	651.583	1317.65	718.696	987.653	941.129	415.42	1031.19	631.428	455.152	734.633	2415.97	840.891	1299.75	661.522	883.583	0.138302	0.001829	0.228994	0.240867	0.228994	-0.42182	519
SA_DCLC_DC_MeanActNum	SA_DCLC_DC_MeanActNum	169	5.47778	8.03704	4.15385	3.69231	4.46154	2.33333	4.92308	6.23077	5.07692	4.53846	15.4444	3.92308	8.61538	6.27273	4.53846	5.83333	7.07692	5.69231	13.8462	17	3.76923	9.8	6.61538	7.38462	0.008803	0.000465	0.128602	0.185196	0.128602	-0.553074	600
SA_DCLC_DC_MeanActRate_onhr	SA_DCLC_DC_MeanActRate_onhr	170	0.488593	0.742782	0.350382	0.327727	0.384403	0.193795	0.440596	0.553985	0.470763	0.406063	1.41356	0.344659	0.816727	0.620371	0.397853	0.538194	0.648283	0.507556	1.28308	1.58826	0.373228	0.875888	0.611758	0.652181	0.006705	0.000381	0.106344	0.170937	0.106344	-0.604304	133
SA_DCLC_DC_MeanActDur_ms	SA_DCLC_DC_MeanActDur_ms	171	4.16879e+06	2.56895e+06	5.18384e+06	5.25987e+06	4.17816e+06	3298340	5.36872e+06	3.27912e+06	3.45879e+06	5.43862e+06	1.0872e+06	5.13521e+06	2.48841e+06	1.77912e+06	3.11589e+06	2927058	3.75162e+06	3.18495e+06	988523	1.21155e+06	3.38471e+06	2.32995e+06	2.72146e+06	2.94412e+06	0.002063	0.000245	0.003672	0.032868	0.003672	0.69845	67
SA_DCLC_DC_MeanActMove_cm	SA_DCLC_DC_MeanActMove_cm	172	6244.8	3443.72	7677.31	8154.31	5318.99	4732.2	10079.1	3812.34	5172.07	10068.5	1426.59	6006.48	5348.67	2542.06	2858.1	3983.93	4460	3239.25	1020.7	2535.82	2918.64	5070.03	3272.44	4075.03	0.0046	0.000316	0.004718	0.036505	0.004718	0.858685	517
SA_DCLC_DC_MeanActChow_mg	SA_DCLC_DC_MeanActChow_mg	173	572.903	369.529	572.117	682.817	624.898	422.556	644.96	480.226	625.018	687.689	201.09	787.658	321.827	492.139	433.176	481.793	461.265	361.268	205.753	197.994	450.811	339.721	269.591	419.015	0.003106	0.000283	0.002298	0.027606	0.002298	0.632602	630
SA_DCLC_DC_MeanActLiquid_mg	SA_DCLC_DC_MeanActLiquid_mg	174	665.288	381.762	694.908	812.296	722.281	547.995	797.18	514.626	647.733	802.339	241.796	871.726	368.557	433.671	538.27	497.876	390.561	373.527	189.269	232.689	477.562	346.938	312.936	419.289	0.000692	0.000219	0.000231	0.00957	0.000231	0.801306	670
SA_DCLC_DC_MeanInactNum	SA_DCLC_DC_MeanInactNum	175	5.68419	8.51891	4.38462	3.84615	4.84615	3.16667	4.84615	6.46154	5.07692	4.69231	15.4444	4.07692	8.92308	7	5.23077	6.25	7.69231	6.38462	14.1538	17.2308	4.30769	9.9	7.38462	7.76923	0.004599	0.000326	0.084179	0.151889	0.084179	-0.583715	528
SA_DCLC_DC_MeanInactRate_onhr	SA_DCLC_DC_MeanInactRate_onhr	176	0.506709	0.786886	0.370643	0.341452	0.418075	0.263113	0.434388	0.574718	0.472673	0.420322	1.41391	0.357796	0.844624	0.691416	0.458723	0.57504	0.705195	0.568367	1.31119	1.6087	0.425435	0.885527	0.68251	0.685902	0.002536	0.000256	0.068401	0.131198	0.068401	-0.634997	537
SA_DCLC_DC_MeanInactDur_ms	SA_DCLC_DC_MeanInactDur_ms	177	5.86512e+06	4.15177e+06	4.42551e+06	6.96662e+06	6.80442e+06	7.2946e+06	4.5775e+06	5.62902e+06	5.96783e+06	6.77693e+06	2.71405e+06	7.49476e+06	3.03294e+06	5.7124e+06	3.77296e+06	5.11522e+06	2.4713e+06	3.89371e+06	2.33154e+06	2.02355e+06	8.52977e+06	3.8394e+06	5.31831e+06	3.7801e+06	0.011457	0.000515	0.028681	0.073556	0.028681	0.498436	365
SA_DCLC_DC_MeanInactMove_cm	SA_DCLC_DC_MeanInactMove_cm	178	170.276	133.366	51.3948	331.243	170.343	199.252	118.922	174.18	141.372	193.916	102.891	219.242	121.517	155.169	90.7544	187.725	92.9957	80.0331	53.7555	165.189	251.108	153.651	117.228	131.262	0.088231	0.001561	0.197463	0.222573	0.197463	0.352484	644
SA_DCLC_LC_MeanTotActDur_ms	SA_DCLC_LC_MeanTotActDur_ms	179	3.23412e+06	2.8305e+06	6.99694e+06	3.3461e+06	2.00102e+06	3.93111e+06	2.90027e+06	2.91765e+06	4.76325e+06	1.41019e+06	1234620	2.84009e+06	1.71494e+06	2.19057e+06	5.2446e+06	2.46534e+06	2.1671e+06	5.47154e+06	2046644	1.34756e+06	4.54547e+06	1.59956e+06	2.29814e+06	2.87456e+06	0.265523	0.002641	0.552948	0.380154	0.552948	0.192317	547
SA_DCLC_LC_MeanTotActMove_cm	SA_DCLC_LC_MeanTotActMove_cm	180	3297.52	2183.01	7882.33	3297.56	1738.62	2085.92	5481.81	2604.73	5087.26	1045.19	1107.05	2644.75	1399.19	2576.24	3828.17	1781.41	2690.86	3701.79	1891.22	1220.32	1972.89	1858.39	769.901	2505.78	0.153381	0.001955	0.125957	0.182539	0.125957	0.595062	507
SA_DCLC_LC_MeanTotActChow_mg	SA_DCLC_LC_MeanTotActChow_mg	181	701.797	841.051	1034.01	688.046	446.799	755.849	436.328	765.935	1125.37	260.552	883.324	621.754	510.447	406.246	1384.14	445.509	478.762	1497.57	1336.73	786.629	954.456	464.133	991.209	836.785	0.224139	0.002409	0.35947	0.293558	0.35947	-0.26114	645
SA_DCLC_LC_MeanTotActLiquid_mg	SA_DCLC_LC_MeanTotActLiquid_mg	182	604.504	667.38	1134.51	702.889	369.323	525.02	476.861	643.463	845.836	361.48	428.385	557.276	278.141	777.064	1306.59	552.038	294.521	1068.39	810.418	474.458	798.652	337.886	420.528	889.865	0.460606	0.003793	0.619964	0.408981	0.619964	-0.142756	220
SA_DCLC_LC_MeanTotInactDur_ms	SA_DCLC_LC_MeanTotInactDur_ms	183	3.49536e+07	3.49143e+07	3.05804e+07	3.42312e+07	3.55763e+07	3.56891e+07	3.47094e+07	3.50612e+07	3.32156e+07	3.65687e+07	3.89636e+07	3.49403e+07	3.58624e+07	3.75635e+07	3.23327e+07	3.46834e+07	35442522	3.21381e+07	3.5563e+07	3.66313e+07	3.34334e+07	3.49329e+07	3.54823e+07	34905831	0.48685	0.003875	0.961584	0.50924	0.961584	0.001623	139
SA_DCLC_LC_MeanTotInactMove_cm	SA_DCLC_LC_MeanTotInactMove_cm	184	852.113	817.439	277.724	1241.06	814.518	954.467	773.695	800.489	638.279	958.786	943.964	1118.14	844.04	851.971	674.843	907.67	717.274	493.649	474.419	1634.69	1021.78	720.221	725.024	743.687	0.16951	0.002036	0.779864	0.458185	0.779864	0.059933	73
SA_DCLC_LC_MeanActNum	SA_DCLC_LC_MeanActNum	185	4.22051	5.48735	5.69231	4.23077	3.92308	5.33333	4.23077	3.46154	4.69231	2.46154	4.33333	3.84615	4.84615	6.45455	7.53846	4.91667	6.30769	6.53846	7.38462	4.69231	4.23077	3.4	3.84615	5.69231	0.020464	0.000622	0.02141	0.063056	0.02141	-0.37869	394
SA_DCLC_LC_MeanActRate_onhr	SA_DCLC_LC_MeanActRate_onhr	186	0.375566	0.473001	0.531894	0.381165	0.36087	0.48306	0.371467	0.305148	0.39967	0.213806	0.358861	0.349723	0.421764	0.496725	0.673098	0.427494	0.54495	0.574351	0.637116	0.399034	0.337091	0.316405	0.329161	0.51882	0.040288	0.001015	0.045594	0.100067	0.045594	-0.332775	380
SA_DCLC_LC_MeanActDur_ms	SA_DCLC_LC_MeanActDur_ms	187	2.05392e+06	1.34837e+06	2.30501e+06	1.92585e+06	2.38983e+06	4.99973e+06	1.23386e+06	1.75088e+06	1.51161e+06	2.49492e+06	267188	1.66031e+06	830528	879119	2.48277e+06	1.55765e+06	922595	1.9612e+06	336495	563966	2.42537e+06	837449	2.26069e+06	1.12257e+06	0.078144	0.001538	0.113217	0.176999	0.113217	0.607165	388
SA_DCLC_LC_MeanActMove_cm	SA_DCLC_LC_MeanActMove_cm	188	2856.98	1511.27	3252.7	2768.88	2755.14	7806.6	2557.12	2014.4	1890.03	3531.04	233.925	1759.99	1559.83	1154.53	2316.45	1873.34	1417.99	1417.3	320.428	1160.41	1449.97	1481.58	2523.34	1460.11	0.003787	0.000283	0.034642	0.082365	0.034642	0.918729	302
SA_DCLC_LC_MeanActChow_mg	SA_DCLC_LC_MeanActChow_mg	189	347.481	254.308	304.131	327.723	389.332	762.007	173.137	335.592	313.915	344.574	203.806	320.588	159.61	187.921	390.231	265.67	154.434	336.072	192.338	203.99	372.914	173.744	404.303	210.467	0.124267	0.001755	0.10522	0.170936	0.10522	0.450355	292
SA_DCLC_LC_MeanActLiquid_mg	SA_DCLC_LC_MeanActLiquid_mg	190	354.064	236.678	313.175	345.632	427.601	854.002	177.827	324.784	246.715	439.437	94.6255	316.839	117.804	248.968	418.797	261.842	150.834	277.165	118.037	155.339	379.99	161.768	309.749	239.841	0.040288	0.001012	0.093856	0.159871	0.093856	0.581084	420
SA_DCLC_LC_MeanInactNum	SA_DCLC_LC_MeanInactNum	191	4.50897	5.53842	5.84615	4.15385	4.38462	4.83333	4.76923	3.76923	4.53846	3.15385	5.33333	4.30769	5.30769	6.36364	6.92308	5.16667	6.53846	6.23077	8	5.15385	3.76923	3.7	3.69231	5.61538	0.043227	0.001061	0.04626	0.101042	0.04626	-0.296676	374
SA_DCLC_LC_MeanInactRate_onhr	SA_DCLC_LC_MeanInactRate_onhr	192	0.402141	0.477075	0.551666	0.368934	0.410461	0.432432	0.419063	0.340272	0.389861	0.280336	0.443725	0.384661	0.459121	0.486703	0.620562	0.451921	0.562268	0.541797	0.684056	0.44317	0.295497	0.351499	0.317646	0.510666	0.040288	0.001008	0.093841	0.160444	0.093841	-0.246516	402
SA_DCLC_LC_MeanInactDur_ms	SA_DCLC_LC_MeanInactDur_ms	193	5.29748e+06	4.45312e+06	4.58069e+06	6.37332e+06	4.52617e+06	5.25916e+06	5.66874e+06	4.8755e+06	5.7927e+06	5.90308e+06	4.42793e+06	5.56752e+06	5.33388e+06	4.11604e+06	4.07971e+06	4.58819e+06	4.51028e+06	4.02146e+06	3.96216e+06	4.48814e+06	5.6984e+06	4.35256e+06	4.0891e+06	4.19752e+06	0.002536	0.000252	0.003808	0.032196	0.003808	0.25049	312
SA_DCLC_LC_MeanInactMove_cm	SA_DCLC_LC_MeanInactMove_cm	194	157.288	128.114	44.7163	262.024	120.401	166.116	138.15	153.058	120.981	222.319	126.183	218.928	140.804	111.108	88.9055	148.182	96.8622	70.2615	56.0215	233.734	207.229	134.908	141.186	108.168	0.11126	0.001664	0.248519	0.256673	0.248519	0.295977	408
SA_APIP_AP_MeanTotActDur_ms	SA_APIP_AP_MeanTotActDur_ms	195	2.53747e+07	2.31184e+07	2.84871e+07	2.43352e+07	2.62109e+07	32044160	2.87795e+07	2.3778e+07	2.00566e+07	2.94748e+07	1.68087e+07	2.37724e+07	2.38937e+07	1.50364e+07	2.87688e+07	2.27144e+07	3.04534e+07	2.69838e+07	1.42183e+07	21926840	1.87808e+07	24146112	2.49297e+07	2.55684e+07	0.16951	0.002032	0.288775	0.255477	0.288775	0.134352	313
SA_APIP_AP_MeanTotActMove_cm	SA_APIP_AP_MeanTotActMove_cm	196	38266.5	32591.8	43335.9	38609.1	32922.8	51079.1	55005.7	28250.1	30253.2	53393.9	22045.6	27769.5	52312	21173.2	27123.9	30886.9	37936.6	24596.2	14650.7	47354.3	15269.8	52949.1	30733.7	36115.4	0.138302	0.001826	0.305783	0.265381	0.305783	0.231572	395
SA_APIP_AP_MeanTotActChow_mg	SA_APIP_AP_MeanTotActChow_mg	197	3578.21	3301.09	3163.5	3247.3	3903.48	4419.27	3472.72	3438.73	3546.86	3724.25	3134.22	3731.74	3078.36	3950.75	3655.13	3699.75	3782.52	3066.26	2965.74	3559.07	2410.2	3474.56	2451.69	3519.08	0.16951	0.002028	0.172397	0.213857	0.172397	0.116293	110
SA_APIP_AP_MeanTotActLiquid_mg	SA_APIP_AP_MeanTotActLiquid_mg	198	4110.75	3471.87	3652.84	3780.96	4564.66	5381.43	4200.06	3722.13	3615.37	4367.57	3734.4	4088.08	3479.66	3667.62	4419.18	3699.51	3451.93	3132.16	2717.84	4210.16	2651.51	3613.36	2995.25	3624.22	0.0046	0.000312	0.012499	0.050946	0.012499	0.24369	44
SA_APIP_AP_MeanTotInactDur_ms	SA_APIP_AP_MeanTotInactDur_ms	199	1.54322e+07	1.59336e+07	1.3882e+07	1.60969e+07	1.56823e+07	1.14253e+07	1.1037e+07	1.66904e+07	1.88919e+07	1.07935e+07	2.26039e+07	1.7219e+07	1.41944e+07	2.13306e+07	1.24552e+07	1.65422e+07	8.77405e+06	1.37957e+07	2.46682e+07	1.67795e+07	1.73604e+07	16059784	1.39976e+07	1.52453e+07	0.434533	0.003678	0.76983	0.455219	0.76983	-0.046125	307
SA_APIP_AP_MeanTotInactMove_cm	SA_APIP_AP_MeanTotInactMove_cm	200	591.57	835.849	183.25	927.377	488.568	398.565	365.718	775.955	500.37	525.675	1169.32	580.894	879.935	801.766	350.877	918.42	576.959	421.585	686.688	2207.83	635.763	1177.25	579.68	793.447	0.078144	0.001534	0.179931	0.217299	0.179931	-0.498695	219
SA_APIP_AP_MeanActNum	SA_APIP_AP_MeanActNum	201	5.84274	8.55288	4.69231	4	5	3.33333	5	6.53846	5.23077	4.76923	15.5556	4.30769	8.92308	7	5.38462	6.25	7.76923	6.38462	14.1538	17.2308	4.30769	10	7.38462	7.84615	0.005061	0.000327	0.096254	0.160365	0.096254	-0.549767	222
SA_APIP_AP_MeanActRate_onhr	SA_APIP_AP_MeanActRate_onhr	202	0.519812	0.789676	0.395424	0.354252	0.43095	0.276659	0.447271	0.581184	0.485448	0.426727	1.42308	0.377133	0.844624	0.691416	0.471229	0.57504	0.711665	0.568367	1.31119	1.6087	0.425435	0.893861	0.68251	0.692072	0.0046	0.000309	0.077128	0.144299	0.077128	-0.603269	593
SA_APIP_AP_MeanActDur_ms	SA_APIP_AP_MeanActDur_ms	203	5.30165e+06	3.13626e+06	6.07103e+06	6.08379e+06	5.24219e+06	9613248	5.75591e+06	3.63663e+06	3.83435e+06	6.18021e+06	1080560	5518600	2.67774e+06	2.14806e+06	5.34278e+06	3.63431e+06	3.91974e+06	4.22639e+06	1.00456e+06	1.27254e+06	4.35983e+06	2.41461e+06	3.37589e+06	3.25872e+06	0.0046	0.000306	0.00931	0.048853	0.00931	0.757394	591
SA_APIP_AP_MeanActMove_cm	SA_APIP_AP_MeanActMove_cm	204	8096.07	4082.47	9235.53	9652.26	6584.56	15323.7	11001.1	4320.61	5783.69	11195.5	1417.22	6446.49	5862.55	3024.74	5037.29	4941.91	4882.93	3852.41	1035.1	2748.24	3544.78	5294.91	4161.86	4602.95	0.003106	0.000279	0.003711	0.03196	0.003711	0.987779	414
SA_APIP_AP_MeanActChow_mg	SA_APIP_AP_MeanActChow_mg	205	733.971	437.57	674.189	811.824	780.697	1325.78	694.544	525.923	678.076	780.891	201.486	866.296	344.989	564.393	678.809	591.96	486.859	480.257	209.536	206.553	559.512	347.456	332	448.51	0.003106	0.000275	0.005001	0.037422	0.005001	0.74621	782
SA_APIP_AP_MeanActLiquid_mg	SA_APIP_AP_MeanActLiquid_mg	206	845.64	461.847	778.474	945.239	912.933	1614.43	840.013	569.267	691.174	915.781	240.069	949.019	389.961	523.946	820.705	591.921	444.308	490.58	192.022	244.34	615.529	361.336	405.607	461.911	0.002063	0.000241	0.002967	0.030094	0.002967	0.872628	620
SA_APIP_AP_MeanInactNum	SA_APIP_AP_MeanInactNum	207	4.84274	7.55288	3.69231	3	4	2.33333	4	5.53846	4.23077	3.76923	14.5556	3.30769	7.92308	6	4.38462	5.25	6.76923	5.38462	13.1538	16.2308	3.30769	9	6.38462	6.84615	0.005061	0.000324	0.096254	0.160952	0.096254	-0.641206	100
SA_APIP_AP_MeanInactRate_onhr	SA_APIP_AP_MeanInactRate_onhr	208	0.431176	0.697002	0.310242	0.264952	0.344946	0.193795	0.356502	0.491931	0.391886	0.337164	1.33139	0.288957	0.749883	0.591976	0.383582	0.48311	0.619635	0.479653	1.21818	1.51545	0.324827	0.804177	0.589816	0.603727	0.0046	0.000303	0.080788	0.148112	0.080788	-0.692885	34
SA_APIP_AP_MeanInactDur_ms	SA_APIP_AP_MeanInactDur_ms	209	3.78029e+06	2.46315e+06	3.75972e+06	5.36562e+06	3.92058e+06	4896550	2.75924e+06	3.01355e+06	4.46536e+06	2.86358e+06	1.55294e+06	5.20576e+06	1.79153e+06	3.5551e+06	2.84067e+06	3.15089e+06	1.29617e+06	2.56206e+06	1.87536e+06	1.03381e+06	5.24849e+06	1.78442e+06	2.19239e+06	2.22684e+06	0.011457	0.000512	0.01727	0.056716	0.01727	0.617995	179
SA_APIP_AP_MeanInactMove_cm	SA_APIP_AP_MeanInactMove_cm	210	139.693	115.093	49.6303	309.126	122.142	170.814	91.4296	140.103	118.269	139.465	80.3351	175.619	111.06	133.628	80.0245	174.937	85.2325	78.2943	52.2043	136.027	192.207	130.805	90.7933	115.897	0.16951	0.002025	0.322993	0.275087	0.322993	0.279468	211
SA_APIP_IP_MeanTotActDur_ms	SA_APIP_IP_MeanTotActDur_ms	211	2.89539e+06	2.39452e+06	6.1666e+06	3.23371e+06	1.80557e+06	2.31722e+06	2.87127e+06	2.71416e+06	4.59637e+06	1.34948e+06	1.14033e+06	2.75923e+06	1.56983e+06	1.79781e+06	4.08881e+06	2.01855e+06	1.916e+06	3.96915e+06	1.9538e+06	1.31583e+06	4.23812e+06	1.53474e+06	1.7688e+06	2.56276e+06	0.186689	0.00216	0.376303	0.30032	0.376303	0.274024	9
SA_APIP_IP_MeanTotActMove_cm	SA_APIP_IP_MeanTotActMove_cm	212	3083.96	1975.23	7069.8	3213.67	1616.7	1597.88	5433.34	2476.61	4873.64	993.399	1000.96	2563.61	1328.06	2224.42	3309.97	1563.26	2570.74	3109.56	1848.35	1199.75	1865.68	1774.57	619.88	2288.5	0.16951	0.002021	0.099763	0.164412	0.099763	0.642765	309
SA_APIP_IP_MeanTotActChow_mg	SA_APIP_IP_MeanTotActChow_mg	213	658.759	764.142	944.19	660.396	411.9	630.726	434.972	715.118	1099.3	244.983	854.667	591.34	467.789	349.249	1252.57	416.914	455.941	1187.59	1303.49	764.01	866.719	445.437	886.771	773.229	0.224139	0.002405	0.435861	0.331619	0.435861	-0.21409	399
SA_APIP_IP_MeanTotActLiquid_mg	SA_APIP_IP_MeanTotActLiquid_mg	214	571.642	592.852	1016.39	680.581	335.336	451.901	476.861	608.636	830.784	355.504	410.044	550.381	266.498	659.648	1180.82	492.159	263.457	806.3	774.463	474.458	756.181	336.639	266.286	837.314	0.51315	0.003956	0.851107	0.481452	0.851107	-0.052559	397
SA_APIP_IP_MeanTotInactDur_ms	SA_APIP_IP_MeanTotInactDur_ms	215	3.77514e+07	3.95639e+07	3.23015e+07	3.71716e+07	3.71385e+07	3.70936e+07	3.81818e+07	3.80586e+07	3.76963e+07	3.96233e+07	4.29286e+07	3.73197e+07	4.11794e+07	4.48492e+07	3.55244e+07	3.91336e+07	3.97262e+07	36120897	4.00293e+07	4.1219e+07	4.08618e+07	3.80548e+07	4.03743e+07	3.76939e+07	0.053103	0.001227	0.114534	0.176639	0.114534	-0.067656	214
SA_APIP_IP_MeanTotInactMove_cm	SA_APIP_IP_MeanTotInactMove_cm	216	963.519	923.208	303.514	1435.04	864.855	1035.29	869.466	926.425	766.433	1085.4	1092.75	1256.01	951.712	991.466	739.338	1020.47	771.723	527.179	522.331	1843.13	1227.03	843.055	807.308	833.759	0.153381	0.001951	0.779175	0.45837	0.779175	0.061657	509
SA_APIP_IP_MeanActNum	SA_APIP_IP_MeanActNum	217	3.85556	4.9715	5.15385	3.92308	3.38462	4.33333	4.15385	3.15385	4.53846	2.23077	4.22222	3.46154	4.53846	5.72727	6.69231	4.5	5.61538	5.84615	7.07692	4.46154	3.69231	3.2	3.07692	5.23077	0.020472	0.000619	0.028464	0.073412	0.028464	-0.366743	590
SA_APIP_IP_MeanActRate_onhr	SA_APIP_IP_MeanActRate_onhr	218	0.341045	0.425895	0.474965	0.352231	0.312895	0.388893	0.364715	0.280244	0.386518	0.193867	0.347507	0.308615	0.394156	0.439137	0.588995	0.39073	0.480613	0.507338	0.603941	0.380061	0.289728	0.298229	0.263165	0.474647	0.034893	0.000903	0.053401	0.110306	0.053401	-0.320535	182
SA_APIP_IP_MeanActDur_ms	SA_APIP_IP_MeanActDur_ms	219	732569	500226	1.1965e+06	824279	533462	534742	691232	860589	1.01276e+06	604938	270077	797110	345894	313904	610972	448567	341206	678934	276080	294928	1.14782e+06	479608	574861	489939	0.018899	0.000602	0.044565	0.098758	0.044565	0.550385	6
SA_APIP_IP_MeanActMove_cm	SA_APIP_IP_MeanActMove_cm	220	762.746	395.133	1371.75	819.17	477.662	368.741	1308.03	785.267	1073.85	445.317	237.069	740.599	292.624	388.391	494.593	347.39	457.803	531.899	261.179	268.908	505.289	554.554	201.461	437.508	0.016057	0.000554	0.005707	0.04071	0.005707	0.948862	3
SA_APIP_IP_MeanActChow_mg	SA_APIP_IP_MeanActChow_mg	221	167.554	157.799	183.201	168.336	121.698	145.552	104.716	226.745	242.218	109.82	202.421	170.831	103.072	60.98	187.165	92.6476	81.1949	203.14	184.188	171.244	234.736	139.199	288.201	147.823	0.35843	0.003271	0.704375	0.436294	0.704375	0.086534	728
SA_APIP_IP_MeanActLiquid_mg	SA_APIP_IP_MeanActLiquid_mg	222	148.037	118.078	197.211	173.481	99.0765	104.285	114.8	192.982	183.054	159.364	97.1156	158.999	58.7198	115.177	176.444	109.369	46.9169	137.92	109.435	106.344	204.799	105.2	86.543	160.075	0.138302	0.001822	0.122723	0.178987	0.122723	0.32621	658
SA_APIP_IP_MeanInactNum	SA_APIP_IP_MeanInactNum	223	5.35043	6.50445	6.53846	5	5.23077	5.66667	5.61538	4.69231	5.38462	4.07692	6.22222	5.07692	6.30769	7.36364	7.76923	6.16667	7.46154	7.23077	9	6.15385	4.76923	4.6	4.69231	6.53846	0.030103	0.000818	0.025191	0.06886	0.025191	-0.281773	723
SA_APIP_IP_MeanInactRate_onhr	SA_APIP_IP_MeanInactRate_onhr	224	0.47874	0.562686	0.616339	0.449562	0.487231	0.512349	0.495923	0.42382	0.463594	0.366691	0.514657	0.457238	0.547067	0.56558	0.695354	0.542459	0.645323	0.634848	0.773114	0.532136	0.379089	0.434748	0.406168	0.59634	0.030106	0.000811	0.057978	0.116595	0.057978	-0.233086	690
SA_APIP_IP_MeanInactDur_ms	SA_APIP_IP_MeanInactDur_ms	225	7.19006e+06	6.35106e+06	4.94023e+06	7.43432e+06	7.10001e+06	6.54593e+06	6.79951e+06	8110851	7.00074e+06	9.71893e+06	6.89924e+06	7.35085e+06	6.52844e+06	6.09063e+06	4.57245e+06	6.34599e+06	5.32413e+06	4.99544e+06	4.4477e+06	6.69809e+06	8.56781e+06	8.27278e+06	8.60437e+06	5.76494e+06	0.053103	0.001223	0.165228	0.210103	0.165228	0.179006	679
SA_APIP_IP_MeanInactMove_cm	SA_APIP_IP_MeanInactMove_cm	226	186.532	151.681	46.4198	287.008	165.34	182.699	154.836	197.435	142.337	266.23	175.62	247.397	150.881	134.643	95.1624	165.482	103.427	72.9077	58.0368	299.509	257.28	183.273	172.049	127.516	0.099258	0.001599	0.261924	0.245018	0.261924	0.298389	712
SA_NumActStates_Eat_Drink	SA_NumActStates_Eat_Drink	227	8.23248	10.3117	8.23077	6.30769	7.23077	6	8.30769	8.69231	8.69231	6	15.5556	7.30769	9.46154	11.0909	8.76923	7.75	8.46154	8.30769	14.6923	17.6154	6.46154	10.9	8.46154	11.7692	0.017424	0.000571	0.121707	0.178075	0.121707	-0.324889	687
SA_NumActStates_Eat_NoDrink	SA_NumActStates_Eat_NoDrink	228	0.933761	2.06569	0.076923	1.53846	1.07692	1.16667	0.384615	0.846154	0.692308	0.615385	2.55556	0.384615	2.07692	1.18182	1.84615	2.58333	3.69231	1.76923	5.07692	1.76923	1.46154	1.1	1.69231	0.538462	0.003786	0.000315	0.01868	0.058808	0.01868	-1.1455	676
SA_NumActStates_NoEat_Drink	SA_NumActStates_NoEat_Drink	229	0.379915	0.585557	1.38461	0	0	0.166667	0.307692	0.076923	0.230769	0.076923	1.55556	0	0.461538	0.181818	1	0.083333	0.230769	1.53846	0.846154	1.38461	0.076923	0.3	0.153846	0.769231	0.068933	0.001442	0.390356	0.308302	0.390356	-0.624136	727
SA_NumActStates_NoEat_NoDrink	SA_NumActStates_NoEat_NoDrink	230	0.152137	0.561402	0.153846	0.076923	0.076923	0.333333	0.153846	0.076923	0.153846	0.307692	0.111111	0.076923	1.46154	0.272727	0.461538	0.333333	1	0.615385	0.615385	0.923077	0	0.9	0.153846	0	0.013568	0.000564	0.010282	0.047896	0.010282	-1.88367	720
SA_NumActStates_NoEat_NoDrink_SmallMove	SA_NumActStates_NoEat_NoDrink_SmallMove	231	0	0.00641	0	0	0	0	0	0	0	0	0	0	0	0	0	0	0.076923	0	0	0	0	0	0	0	0.381138	0.003436	0.374128	0.300687	0.374128	#NAME?	716
SA_NumActStates_LargeEat_LargeDrink	SA_NumActStates_LargeEat_LargeDrink	232	7.91752	9.47418	8	6.15385	6.92308	5.83333	7.76923	8.53846	8.61538	5.92308	14.1111	7.30769	8.61538	10.6364	8.15385	7.5	7.53846	7.92308	13.2308	15.0769	6.07692	10.4	8	10.5385	0.046337	0.001125	0.164802	0.210146	0.164802	-0.258953	709
SA_NumActStates_LargeEat_SmallDrink	SA_NumActStates_LargeEat_SmallDrink	233	1.05641	2.06855	0.307692	1.69231	1.23077	1.33333	0.692308	0.769231	0.538462	0.615385	3	0.384615	1.23077	1.36364	1.53846	2.66667	2.92308	1.61539	5.07692	3.15385	1.46154	1.1	1.76923	0.923077	0.007349	0.000407	0.034418	0.082262	0.034418	-0.96945	849
SA_NumActStates_SmallEat_LargeDrink	SA_NumActStates_SmallEat_LargeDrink	234	0.454274	0.83447	1.07692	0	0.153846	0.166667	0.461538	0.076923	0.307692	0.076923	2.22222	0	0.769231	0.363636	1.07692	0.25	0.615385	1.46154	1.46154	1.76923	0.384615	0.4	0.230769	1.23077	0.014775	0.000523	0.166604	0.210679	0.166604	-0.877298	398
SA_NumActStates_SmallEat_SmallDrink	SA_NumActStates_SmallEat_SmallDrink	235	0.270085	1.14718	0.461538	0.076923	0.076923	0.333333	0.230769	0.307692	0.307692	0.384615	0.444444	0.076923	2.84615	0.363636	1.30769	0.333333	2.30769	1.23077	1.46154	1.69231	0.076923	1.3	0.461538	0.384615	0.003101	0.000299	0.004831	0.036753	0.004831	-2.08661	713
SA_NumActStates_SmallEat_SmallDrink_SmallMove	SA_NumActStates_SmallEat_SmallDrink_SmallMove	236	0.030769	0.00641	0.307692	0	0	0	0	0	0	0	0	0	0	0	0	0	0.076923	0	0	0	0	0	0	0	0.473274	0.003798	0.408045	0.316253	0.408045	2.26303	724
SA_PerActStates_Eat_Drink	SA_PerActStates_Eat_Drink	237	85.5545	76.4927	83.5938	79.6116	86.2385	78.2609	90.7563	89.6825	88.9764	85.7143	78.6517	94.0594	70.2857	87.1429	72.6115	72.093	63.2184	67.9245	69.2029	81.2057	80.7692	82.5758	80.8824	90	0.01359	0.000562	0.008112	0.046288	0.008112	0.161523	592
SA_PerActStates_Eat_NoDrink	SA_PerActStates_Eat_NoDrink	238	9.49417	15.4208	0.78125	19.4175	12.844	15.2174	4.20168	8.73016	7.08661	8.79121	12.9213	4.9505	15.4286	9.28571	15.2866	24.031	27.5862	14.4654	23.913	8.15603	18.2692	8.33333	16.1765	4.11765	0.030106	0.000808	0.047332	0.100967	0.047332	-0.699762	827
SA_PerActStates_NoEat_Drink	SA_PerActStates_NoEat_Drink	239	3.17177	4.09759	14.0625	0	0	2.17391	3.36135	0.793651	2.3622	1.0989	7.86517	0	3.42857	1.42857	8.28026	0.775194	1.72414	12.5786	3.98551	6.38298	0.961538	2.27273	1.47059	5.88235	0.124256	0.00177	0.597388	0.39928	0.597388	-0.369487	838
SA_PerActStates_NoEat_NoDrink	SA_PerActStates_NoEat_NoDrink	240	1.77953	3.98898	1.5625	0.970874	0.917431	4.34783	1.68067	0.793651	1.5748	4.3956	0.561798	0.990099	10.8571	2.14286	3.82166	3.10078	7.47126	5.03145	2.89855	4.25532	0	6.81818	1.47059	0	0.053101	0.00124	0.056584	0.114802	0.056584	-1.16453	788
SA_PerActStates_NoEat_NoDrink_SmallMove	SA_PerActStates_NoEat_NoDrink_SmallMove	241	0	0.047893	0	0	0	0	0	0	0	0	0	0	0	0	0	0	0.574713	0	0	0	0	0	0	0	0.381138	0.003431	0.374128	0.299631	0.374128	#NAME?	799
SA_PerActStates_LargeEat_LargeDrink	SA_PerActStates_LargeEat_LargeDrink	242	82.8757	70.7989	81.25	77.6699	82.5688	76.087	84.8739	88.0952	88.189	84.6154	71.3483	94.0594	64	83.5714	67.5159	69.7674	56.3218	64.7799	62.3188	69.5035	75.9615	78.7879	76.4706	80.5882	0.001349	0.000219	0.001382	0.020351	0.001382	0.227222	247
SA_PerActStates_LargeEat_SmallDrink	SA_PerActStates_LargeEat_SmallDrink	243	10.6476	15.1228	3.125	21.3592	14.6789	17.3913	7.56302	7.93651	5.51181	8.79121	15.1685	4.9505	9.14286	10.7143	12.7389	24.8062	21.8391	13.2075	23.913	14.539	18.2692	8.33333	16.9118	7.05882	0.053103	0.001218	0.100736	0.165417	0.100736	-0.5062	252
SA_PerActStates_SmallEat_LargeDrink	SA_PerActStates_SmallEat_LargeDrink	244	3.62664	5.90478	10.9375	0	1.83486	2.17391	5.04202	0.793651	3.14961	1.0989	11.236	0	5.71429	2.85714	8.9172	2.32558	4.5977	11.9497	6.88406	8.15603	4.80769	3.0303	2.20588	9.41177	0.034891	0.000907	0.163503	0.210846	0.163503	-0.703249	153
SA_PerActStates_SmallEat_SmallDrink	SA_PerActStates_SmallEat_SmallDrink	245	2.85006	8.17346	4.6875	0.970874	0.917431	4.34783	2.52101	3.1746	3.14961	5.49451	2.24719	0.990099	21.1429	2.85714	10.828	3.10078	17.2414	10.0629	6.88406	7.80142	0.961538	9.84849	4.41176	2.94118	0.01359	0.000558	0.015063	0.054573	0.015063	-1.51995	154
SA_PerActStates_SmallEat_SmallDrink_SmallMove	SA_PerActStates_SmallEat_SmallDrink_SmallMove	246	0.3125	0.047893	3.125	0	0	0	0	0	0	0	0	0	0	0	0	0	0.574713	0	0	0	0	0	0	0	0.473274	0.003794	0.370283	0.299177	0.370283	2.70598	160
SA_AP_NumActStates_Eat_Drink	SA_AP_NumActStates_Eat_Drink	247	5.48461	7.32579	4.23077	3.92308	5	3.33333	4.53846	6.23077	5.07692	4.53846	13.6667	4.30769	7.61538	6.63636	4.61538	5.75	5.69231	5.30769	11	15	4	8.6	6.46154	7.23077	0.00962	0.0005	0.170208	0.212877	0.170208	-0.417593	159
SA_AP_NumActStates_Eat_NoDrink	SA_AP_NumActStates_Eat_NoDrink	248	0.161538	0.75542	0	0.076923	0	0	0.153846	0.230769	0.076923	0.076923	1	0	1	0.272727	0.461538	0.5	1.38461	0.538462	2.15385	0.846154	0.307692	0.6	0.769231	0.230769	0.000548	0.001216	0.006582	0.042318	0.006582	-2.2254	227
SA_AP_NumActStates_NoEat_Drink	SA_AP_NumActStates_NoEat_Drink	249	0.181197	0.273077	0.461538	0	0	0	0.230769	0.076923	0.076923	0.076923	0.888889	0	0.230769	0	0.230769	0	0.076923	0.538462	0.615385	0.923077	0	0.2	0.076923	0.384615	0.169273	0.002066	0.467398	0.34864	0.467398	-0.591752	232
SA_AP_NumActStates_NoEat_NoDrink	SA_AP_NumActStates_NoEat_NoDrink	250	0.015385	0.198601	0	0	0	0	0.076923	0	0	0.076923	0	0	0.076923	0.090909	0.076923	0	0.615385	0	0.384615	0.461538	0	0.6	0.076923	0	0.015735	0.000554	0.029012	0.073989	0.029012	-3.69032	583
SA_AP_NumActStates_NoEat_NoDrink_SmallMove	SA_AP_NumActStates_NoEat_NoDrink_SmallMove	251	0	0	0	0	0	0	0	0	0	0	0	0	0	0	0	0	0	0	0	0	0	0	0	0	0.513446	0.003922					504
SA_AP_NumActStates_LargeEat_LargeDrink	SA_AP_NumActStates_LargeEat_LargeDrink	252	5.33504	6.84289	4.23077	3.84615	5	3.33333	4.38462	6.15385	5.07692	4.46154	12.5556	4.30769	7	6.54545	4.30769	5.5	5.38462	5.07692	9.76923	13.2308	4	8.3	6.15385	6.84615	0.017425	0.000568	0.193182	0.223827	0.193182	-0.359106	325
SA_AP_NumActStates_LargeEat_SmallDrink	SA_AP_NumActStates_LargeEat_SmallDrink	253	0.17265	0.780196	0	0.153846	0	0	0.230769	0.153846	0	0.076923	1.11111	0	0.461538	0.363636	0.384615	0.583333	1	0.538462	2.38462	1.69231	0.307692	0.8	0.692308	0.153846	0.000865	0.000262	0.014722	0.053766	0.014722	-2.17599	494
SA_AP_NumActStates_SmallEat_LargeDrink	SA_AP_NumActStates_SmallEat_LargeDrink	254	0.240171	0.421581	0.384615	0	0	0	0.307692	0	0.076923	0.076923	1.55556	0	0.461538	0	0.307692	0.166667	0.307692	0.615385	1.23077	1.07692	0	0.2	0.153846	0.538462	0.046218	0.001126	0.342762	0.286054	0.342762	-0.811749	609
SA_AP_NumActStates_SmallEat_SmallDrink	SA_AP_NumActStates_SmallEat_SmallDrink	255	0.094872	0.508217	0.076923	0	0	0	0.076923	0.230769	0.076923	0.153846	0.333333	0	1	0.090909	0.384615	0	1.07692	0.153846	0.769231	1.23077	0	0.7	0.384615	0.307692	0.007325	0.00041	0.008583	0.047205	0.008583	-2.42139	569
SA_AP_NumActStates_SmallEat_SmallDrink_SmallMove	SA_AP_NumActStates_SmallEat_SmallDrink_SmallMove	256	0.007692	0	0.076923	0	0	0	0	0	0	0	0	0	0	0	0	0	0	0	0	0	0	0	0	0	0.355797	0.003265	0.283987	0.252711	0.283987	Inf	505
SA_AP_PerActStates_Eat_Drink	SA_AP_PerActStates_Eat_Drink	257	95.4381	86.4624	90.1639	98.0769	100	100	90.7692	95.2941	97.0588	95.1613	87.8571	100	85.3448	94.8052	85.7143	92	73.2673	83.1325	77.7174	87.0536	92.8571	86	87.5	92.1569	0.000867	0.000251	0.0012	0.019565	0.0012	0.142493	495
SA_AP_PerActStates_Eat_NoDrink	SA_AP_PerActStates_Eat_NoDrink	258	1.80415	8.71323	0	1.92308	0	0	3.07692	3.52941	1.47059	1.6129	6.42857	0	11.2069	3.8961	8.57143	8	17.8218	8.43374	15.2174	4.91071	7.14286	6	10.4167	2.94118	0.000209	0.001392	0.000209	0.009548	0.000209	-2.27189	822
SA_AP_PerActStates_NoEat_Drink	SA_AP_PerActStates_NoEat_Drink	259	2.44257	2.8287	9.83607	0	0	0	4.61538	1.17647	1.47059	1.6129	5.71429	0	2.58621	0	4.28571	0	0.990099	8.43374	4.34783	5.35714	0	2	1.04167	4.90196	0.334001	0.003126	0.763655	0.454511	0.763655	-0.211737	833
SA_AP_PerActStates_NoEat_NoDrink	SA_AP_PerActStates_NoEat_NoDrink	260	0.315136	1.99565	0	0	0	0	1.53846	0	0	1.6129	0	0	0.862069	1.2987	1.42857	0	7.92079	0	2.71739	2.67857	0	6	1.04167	0	0.034403	0.000898	0.056283	0.114703	0.056283	-2.66281	272
SA_AP_PerActStates_NoEat_NoDrink_SmallMove	SA_AP_PerActStates_NoEat_NoDrink_SmallMove	261	0	0	0	0	0	0	0	0	0	0	0	0	0	0	0	0	0	0	0	0	0	0	0	0	0.513446	0.003918					267
SA_AP_PerActStates_LargeEat_LargeDrink	SA_AP_PerActStates_LargeEat_LargeDrink	262	93.9449	81.7527	90.1639	96.1538	100	100	87.6923	94.1176	97.0588	93.5484	80.7143	100	78.4483	93.5065	80	88	69.3069	79.5181	69.0217	76.7857	92.8571	83	83.3333	87.2549	0.000692	0.000242	0.000824	0.020895	0.000824	0.200549	217
SA_AP_PerActStates_LargeEat_SmallDrink	SA_AP_PerActStates_LargeEat_SmallDrink	263	1.95702	8.44136	0	3.84615	0	0	4.61538	2.35294	0	1.6129	7.14286	0	5.17241	5.1948	7.14286	9.33333	12.8713	8.43374	16.8478	9.82143	7.14286	8	9.375	1.96078	0.000267	0.000889	0.000177	0.008975	0.000177	-2.10881	218
SA_AP_PerActStates_SmallEat_LargeDrink	SA_AP_PerActStates_SmallEat_LargeDrink	264	2.74341	4.42034	8.19672	0	0	0	6.15385	0	1.47059	1.6129	10	0	5.17241	0	5.71429	2.66667	3.9604	9.63855	8.69565	6.25	0	2	2.08333	6.86275	0.088082	0.00158	0.276693	0.25012	0.276693	-0.688188	186
SA_AP_PerActStates_SmallEat_SmallDrink	SA_AP_PerActStates_SmallEat_SmallDrink	265	1.35465	5.38558	1.63934	0	0	0	1.53846	3.52941	1.47059	3.22581	2.14286	0	11.2069	1.2987	7.14286	0	13.8614	2.40964	5.43478	7.14286	0	7	5.20833	3.92157	0.009595	0.000503	0.009661	0.048464	0.009661	-1.99119	185
SA_AP_PerActStates_SmallEat_SmallDrink_SmallMove	SA_AP_PerActStates_SmallEat_SmallDrink_SmallMove	266	0.163934	0	1.63934	0	0	0	0	0	0	0	0	0	0	0	0	0	0	0	0	0	0	0	0	0	0.355797	0.003261	0.283987	0.252219	0.283987	Inf	191
SA_IP_NumActStates_Eat_Drink	SA_IP_NumActStates_Eat_Drink	267	2.74786	2.98596	4	2.38462	2.23077	2.66667	3.76923	2.46154	3.61538	1.46154	1.88889	3	1.84615	4.45455	4.15385	2	2.76923	3	3.69231	2.61538	2.46154	2.3	2	4.53846	0.310458	0.002964	0.552163	0.380186	0.552163	-0.119883	192
SA_IP_NumActStates_Eat_NoDrink	SA_IP_NumActStates_Eat_NoDrink	268	0.772222	1.31027	0.076923	1.46154	1.07692	1.16667	0.230769	0.615385	0.615385	0.538462	1.55556	0.384615	1.07692	0.909091	1.38461	2.08333	2.30769	1.23077	2.92308	0.923077	1.15385	0.5	0.923077	0.307692	0.073433	0.001458	0.072347	0.13704	0.072347	-0.762772	223
SA_IP_NumActStates_NoEat_Drink	SA_IP_NumActStates_NoEat_Drink	269	0.198718	0.312481	0.923077	0	0	0.166667	0.076923	0	0.153846	0	0.666667	0	0.230769	0.181818	0.769231	0.083333	0.153846	1	0.230769	0.461538	0.076923	0.1	0.076923	0.384615	0.032384	0.000848	0.402751	0.313748	0.402751	-0.653044	224
SA_IP_NumActStates_NoEat_NoDrink	SA_IP_NumActStates_NoEat_NoDrink	270	0.136752	0.362801	0.153846	0.076923	0.076923	0.333333	0.076923	0.076923	0.153846	0.230769	0.111111	0.076923	1.38461	0.181818	0.384615	0.333333	0.384615	0.615385	0.230769	0.461538	0	0.3	0.076923	0	0.03744	0.000954	0.075439	0.142305	0.075439	-1.40762	769
SA_IP_NumActStates_NoEat_NoDrink_SmallMove	SA_IP_NumActStates_NoEat_NoDrink_SmallMove	271	0	0.00641	0	0	0	0	0	0	0	0	0	0	0	0	0	0	0.076923	0	0	0	0	0	0	0	0.381138	0.003427	0.374128	0.300158	0.374128	#NAME?	747
SA_IP_NumActStates_LargeEat_LargeDrink	SA_IP_NumActStates_LargeEat_LargeDrink	272	2.58248	2.63129	3.76923	2.30769	1.92308	2.5	3.38462	2.38462	3.53846	1.46154	1.55556	3	1.61539	4.09091	3.84615	2	2.15385	2.84615	3.46154	1.84615	2.07692	2.1	1.84615	3.69231	0.486849	0.003889	0.89643	0.493038	0.89643	-0.027016	758
SA_IP_NumActStates_LargeEat_SmallDrink	SA_IP_NumActStates_LargeEat_SmallDrink	273	0.883761	1.28835	0.307692	1.53846	1.23077	1.33333	0.461538	0.615385	0.538462	0.538462	1.88889	0.384615	0.769231	1	1.15385	2.08333	1.92308	1.07692	2.69231	1.46154	1.15385	0.3	1.07692	0.769231	0.099247	0.001626	0.140768	0.194142	0.140768	-0.543802	759
SA_IP_NumActStates_SmallEat_LargeDrink	SA_IP_NumActStates_SmallEat_LargeDrink	274	0.214103	0.412889	0.692308	0	0.153846	0.166667	0.153846	0.076923	0.230769	0	0.666667	0	0.307692	0.363636	0.769231	0.083333	0.307692	0.846154	0.230769	0.692308	0.384615	0.2	0.076923	0.692308	0.016044	0.000562	0.094149	0.159774	0.094149	-0.94745	748
SA_IP_NumActStates_SmallEat_SmallDrink	SA_IP_NumActStates_SmallEat_SmallDrink	275	0.175214	0.638967	0.384615	0.076923	0.076923	0.333333	0.153846	0.076923	0.230769	0.230769	0.111111	0.076923	1.84615	0.272727	0.923077	0.333333	1.23077	1.07692	0.692308	0.461538	0.076923	0.6	0.076923	0.076923	0.017364	0.000572	0.016285	0.055478	0.016285	-1.86662	770
SA_IP_NumActStates_SmallEat_SmallDrink_SmallMove	SA_IP_NumActStates_SmallEat_SmallDrink_SmallMove	276	0.023077	0.00641	0.230769	0	0	0	0	0	0	0	0	0	0	0	0	0	0.076923	0	0	0	0	0	0	0	0.473274	0.003789	0.459847	0.344133	0.459847	1.848	703
SA_IP_PerActStates_Eat_Drink	SA_IP_PerActStates_Eat_Drink	277	71.1215	60.5584	77.6119	60.7843	65.9091	61.5385	90.7407	78.0488	79.661	65.5172	44.7368	86.6667	40.678	77.7778	62.069	44.4444	49.3151	51.3158	52.1739	58.6207	66.6667	71.875	65	86.7647	0.053103	0.001214	0.090771	0.158156	0.090771	0.231958	692
SA_IP_PerActStates_Eat_NoDrink	SA_IP_PerActStates_Eat_NoDrink	278	20.8207	26.124	1.49254	37.2549	31.8182	26.9231	5.55556	19.5122	13.5593	24.1379	36.8421	11.1111	23.7288	15.873	20.6897	46.2963	41.0959	21.0526	41.3043	20.6897	31.25	15.625	30	5.88235	0.186686	0.002171	0.329372	0.277927	0.329372	-0.327356	681
SA_IP_PerActStates_NoEat_Drink	SA_IP_PerActStates_NoEat_Drink	279	4.27878	5.84312	17.9104	0	0	3.84615	1.85185	0	3.38983	0	15.7895	0	5.08475	3.1746	11.4943	1.85185	2.73973	17.1053	3.26087	10.3448	2.08333	3.125	2.5	7.35294	0.073388	0.001462	0.535239	0.374751	0.535239	-0.44954	691
SA_IP_PerActStates_NoEat_NoDrink	SA_IP_PerActStates_NoEat_NoDrink	280	3.77902	7.4745	2.98508	1.96078	2.27273	7.69231	1.85185	2.43902	3.38983	10.3448	2.63158	2.22222	30.5085	3.1746	5.74713	7.40741	6.84931	10.5263	3.26087	10.3448	0	9.375	2.5	0	0.083067	0.001494	0.188015	0.22178	0.188015	-0.983963	680
SA_IP_PerActStates_NoEat_NoDrink_SmallMove	SA_IP_PerActStates_NoEat_NoDrink_SmallMove	281	0	0.114155	0	0	0	0	0	0	0	0	0	0	0	0	0	0	1.36986	0	0	0	0	0	0	0	0.381138	0.003422	0.374128	0.299107	0.374128	#NAME?	702
SA_IP_PerActStates_LargeEat_LargeDrink	SA_IP_PerActStates_LargeEat_LargeDrink	282	67.0552	53.2278	73.1343	58.8235	56.8182	57.6923	81.4815	75.6098	77.9661	65.5172	36.8421	86.6667	35.5932	71.4286	57.4713	44.4444	38.3562	48.6842	48.913	41.3793	56.25	65.625	60	70.5882	0.016057	0.000551	0.026698	0.07045	0.026698	0.333169	23
SA_IP_PerActStates_LargeEat_SmallDrink	SA_IP_PerActStates_LargeEat_SmallDrink	283	23.4792	25.979	5.97015	39.2157	36.3636	30.7692	11.1111	19.5122	11.8644	24.1379	44.7368	11.1111	16.9492	17.4603	17.2414	46.2963	34.2466	18.4211	38.0435	32.7586	31.25	9.375	35	14.7059	0.334106	0.003122	0.647047	0.419571	0.647047	-0.14596	89
SA_IP_PerActStates_SmallEat_LargeDrink	SA_IP_PerActStates_SmallEat_LargeDrink	284	4.88414	8.13401	13.4328	0	4.54545	3.84615	3.7037	2.43902	5.08475	0	15.7895	0	6.77966	6.34921	11.4943	1.85185	5.47945	14.4737	3.26087	15.5172	10.4167	6.25	2.5	13.2353	0.053095	0.001244	0.1522	0.203752	0.1522	-0.735863	167
SA_IP_PerActStates_SmallEat_SmallDrink	SA_IP_PerActStates_SmallEat_SmallDrink	285	4.58146	12.6592	7.46269	1.96078	2.27273	7.69231	3.7037	2.43902	5.08475	10.3448	2.63158	2.22222	40.678	4.7619	13.7931	7.40741	21.9178	18.4211	9.78261	10.3448	2.08333	18.75	2.5	1.47059	0.043227	0.001057	0.039357	0.09074	0.039357	-1.46631	199
SA_IP_PerActStates_SmallEat_SmallDrink_SmallMove	SA_IP_PerActStates_SmallEat_SmallDrink_SmallMove	286	0.447761	0.114155	4.47761	0	0	0	0	0	0	0	0	0	0	0	0	0	1.36986	0	0	0	0	0	0	0	0.473274	0.003785	0.44236	0.334889	0.44236	1.97173	510
BA_PE_APIP_Large_MeanTotalBoutDur_ms	BA_PE_APIP_Large_MeanTotalBoutDur_ms	287	6.32146e+06	4.78757e+06	5.11269e+06	8.364e+06	7.8138e+06	5265036	6814078	7.38287e+06	5.66305e+06	9.1236e+06	2.66921e+06	5006218	4.15292e+06	4.45416e+06	4.06277e+06	7.87972e+06	3.91914e+06	3.37731e+06	2.86154e+06	3.52301e+06	8.04968e+06	5.3259e+06	3.34896e+06	6.49569e+06	0.040288	0.001004	0.066745	0.132475	0.066745	0.400964	594
BA_PE_APIP_Large_MeanTotalBoutIntake_mg	BA_PE_APIP_Large_MeanTotalBoutIntake_mg	288	4121.54	3872.32	3936.61	3892.85	4209.25	4856.21	3794.84	4112.04	4605.06	3744.99	3916.79	4146.76	3148.33	3818.04	4767.45	4083.66	4099.24	4171.3	4016.86	4221.5	2940.46	3844.87	3248.4	4107.75	0.224139	0.002401	0.214873	0.234105	0.214873	0.089984	225
BA_PE_APIP_Large_BoutNumber	BA_PE_APIP_Large_BoutNumber	289	97.4774	44.8683	73.0769	142	124.692	114.833	125.846	101.154	60.6154	102.462	43.5556	86.5385	24	40.5455	50.8462	95.6667	30.0769	39.8462	21.8462	60.6923	29.1538	45.9	39.0769	60.7692	0.000549	0.000522	0.000127	0.058102	0.000127	1.11937	400
BA_PE_APIP_Large_BoutProbability	BA_PE_APIP_Large_BoutProbability	290	0.661492	0.471345	0.58033	0.877794	0.621073	0.701629	0.62229	0.747584	0.670068	0.626529	0.519205	0.648415	0.239816	0.514418	0.479333	0.759762	0.29465	0.60514	0.393897	0.570499	0.38713	0.511136	0.477444	0.422912	0.000868	0.000241	0.001731	0.02395	0.001731	0.488941	310
BA_PE_APIP_Large_BoutPerCumIntake	BA_PE_APIP_Large_BoutPerCumIntake	291	97.2844	95.1038	95.835	99.6201	97.5406	96.1625	97.1119	98.9935	99.1155	94.3506	98.1924	95.9215	88.7815	88.7916	97.1424	99.1983	96.7153	98.0596	94.0885	97.6503	89.7324	98.0834	97.3024	95.7002	0.124267	0.001752	0.113179	0.17816	0.113179	0.032704	298
BA_PE_APIP_Large_BoutMeanDur_ms	BA_PE_APIP_Large_BoutMeanDur_ms	292	66611.4	119500	69963.2	58901.4	62664.6	45849.4	54146.1	72986.5	93426	89044.2	61283	57849.6	173038	109856	79903.3	82366.4	130304	84758.8	130986	58047	276110	116033	85701.8	106891	0.001672	0.000237	0.011143	0.048911	0.011143	-0.843165	382
BA_PE_APIP_Large_BoutMeanSize_mg	BA_PE_APIP_Large_BoutMeanSize_mg	293	47.8502	99.2958	53.8694	27.4144	33.7571	42.2892	30.1546	40.6513	75.9718	36.5502	89.9262	47.9181	131.18	94.1669	93.7622	42.6864	136.292	104.685	183.87	69.5557	100.86	83.7662	83.1284	67.5959	0.000549	0.000457	0.000884	0.02124	0.000884	-1.05321	863
BA_PE_APIP_Large_BoutMeanIntensity_mgs	BA_PE_APIP_Large_BoutMeanIntensity_mgs	294	0.748661	0.959674	0.764773	0.47717	0.562476	0.972157	0.578565	0.568656	0.833515	0.422887	1.45798	0.848425	0.764603	0.891807	1.277	0.537112	1.07189	1.47564	1.3936	1.30235	0.393345	0.726792	1.02086	0.661086	0.099258	0.001595	0.154722	0.205322	0.154722	-0.358233	866
BA_PE_APIP_Large_BoutRatioIntensity_mgs	BA_PE_APIP_Large_BoutRatioIntensity_mgs	295	0.732969	0.906633	0.769968	0.465428	0.538695	0.92235	0.556911	0.55697	0.813176	0.410473	1.46739	0.828322	0.7581	0.857184	1.17345	0.51825	1.04595	1.2351	1.40374	1.19826	0.36529	0.721919	0.969973	0.632381	0.11126	0.00166	0.21207	0.234407	0.21207	-0.306768	616
BA_PE_APIP_Large_BoutSlopeIntensity_mgs	BA_PE_APIP_Large_BoutSlopeIntensity_mgs	296	0.735791	0.867896	0.792667	0.45665	0.527807	0.863931	0.536344	0.556795	0.931132	0.380621	1.56922	0.742745	0.722397	0.76967	0.907377	0.575891	1.0011	1.07549	1.45246	1.19404	0.310046	0.715322	1.11865	0.572314	0.11126	0.001656	0.361498	0.294686	0.361498	-0.238226	53
BA_PE_APIP_Large_AP_MeanTotalBoutDur_ms	BA_PE_APIP_Large_AP_MeanTotalBoutDur_ms	297	5.3651e+06	3.90503e+06	4.05242e+06	6.91867e+06	6.96211e+06	4.68343e+06	6123913	5.91051e+06	4.21679e+06	8.53795e+06	2.14231e+06	4.10287e+06	3.5311e+06	3.9101e+06	2.95174e+06	7.05156e+06	3.49787e+06	2.53315e+06	2.10597e+06	3.05689e+06	5.65944e+06	4.64964e+06	2.61855e+06	5.29435e+06	0.025877	0.000752	0.054144	0.111337	0.054144	0.45827	119
BA_PE_APIP_Large_AP_MeanTotalBoutIntake_mg	BA_PE_APIP_Large_AP_MeanTotalBoutIntake_mg	298	3477.01	3126.16	3100.54	3236.01	3800.23	4227.83	3373.58	3398.07	3509.09	3501.69	3062.83	3560.21	2688.43	3470.42	3523.54	3668.17	3649.29	2988.21	2832.34	3463.02	2092.53	3410.03	2368.25	3359.68	0.11126	0.001652	0.085292	0.152093	0.085292	0.153455	129
BA_PE_APIP_Large_AP_BoutNumber	BA_PE_APIP_Large_AP_BoutNumber	299	91.862	39.8896	67.7692	134.154	121.231	109.5	119	94.2308	51.3077	100.154	39.8889	81.3846	21.5385	33.1818	42.7692	91.4167	24.6154	33.6154	16.5385	57.5385	24.3846	43	35.3846	54.6923	0.000549	0.000406	0.000145	0.011038	0.000145	1.20345	63
BA_PE_APIP_Large_AP_BoutProbability	BA_PE_APIP_Large_AP_BoutProbability	300	0.654012	0.448047	0.585771	0.875063	0.616347	0.694503	0.622535	0.737508	0.646945	0.623563	0.498611	0.639275	0.223108	0.471576	0.450933	0.751885	0.261652	0.576517	0.353038	0.559461	0.357384	0.504695	0.458167	0.408152	0.000868	0.000231	0.001102	0.020966	0.001102	0.545666	850
BA_PE_APIP_Large_AP_BoutPerCumIntake	BA_PE_APIP_Large_AP_BoutPerCumIntake	301	97.2733	94.5405	98.0096	99.6523	97.3547	95.668	97.1452	98.8177	98.9352	94.0242	97.7222	95.4034	87.3329	87.8421	96.4	99.1465	96.4778	97.4548	95.5018	97.3012	86.8196	98.1426	96.5965	95.4706	0.078144	0.001529	0.085055	0.152265	0.085055	0.04111	707
BA_PE_APIP_Large_AP_BoutMeanDur_ms	BA_PE_APIP_Large_AP_BoutMeanDur_ms	302	59731	111407	59797.3	51572.6	57428.6	42771	51461.5	62723.8	82186.3	85248.4	53707	50413.3	163944	117839	69015.5	77136.5	142101	75356.9	127338	53127.8	232091	108131	74002.4	96802.5	0.001349	0.000214	0.005168	0.037448	0.005168	-0.89929	722
BA_PE_APIP_Large_AP_BoutMeanSize_mg	BA_PE_APIP_Large_AP_BoutMeanSize_mg	303	42.8127	92.8319	45.7514	24.1216	31.347	38.6103	28.3494	36.0612	68.3931	34.9631	76.7841	43.7454	124.82	104.588	82.3849	40.1259	148.252	88.8942	171.258	60.1861	85.8135	79.3029	66.9287	61.4288	0.000549	0.000366	0.001115	0.019582	0.001115	-1.11658	711
BA_PE_APIP_Large_AP_BoutMeanIntensity_mgs	BA_PE_APIP_Large_AP_BoutMeanIntensity_mgs	304	0.750819	0.958253	0.761829	0.479177	0.565441	0.965844	0.57226	0.576484	0.85873	0.423243	1.44228	0.862895	0.768859	0.932932	1.28316	0.538376	1.07952	1.48223	1.33608	1.28272	0.398777	0.73309	1.00188	0.661411	0.088231	0.001557	0.153795	0.204688	0.153795	-0.351942	714
BA_PE_APIP_Large_AP_BoutRatioIntensity_mgs	BA_PE_APIP_Large_AP_BoutRatioIntensity_mgs	305	0.734693	0.892137	0.765108	0.467721	0.545844	0.902722	0.550886	0.57492	0.832171	0.410133	1.42968	0.867735	0.761356	0.887554	1.19372	0.520193	1.04329	1.17964	1.34491	1.13285	0.369741	0.733396	0.904413	0.634579	0.11126	0.001649	0.233344	0.243757	0.233344	-0.280125	725
BA_PE_APIP_Large_AP_BoutSlopeIntensity_mgs	BA_PE_APIP_Large_AP_BoutSlopeIntensity_mgs	306	0.740328	0.812486	0.814122	0.446903	0.543416	0.704228	0.535872	0.630359	0.955888	0.358157	1.4399	0.974437	0.713079	0.751481	0.933196	0.592006	0.9923	0.935279	1.3965	0.924015	0.281847	0.739083	0.897365	0.593674	0.224139	0.002398	0.574349	0.390747	0.574349	-0.134177	580
BA_PE_APIP_Large_IP_MeanTotalBoutDur_ms	BA_PE_APIP_Large_IP_MeanTotalBoutDur_ms	307	956360	882537	1.06028e+06	1.44534e+06	851688	581609	690165	1.47236e+06	1.44626e+06	585651	526901	903348	621817	544068	1.11103e+06	828164	421271	844162	755565	466116	2.39023e+06	676263	730415	1.20133e+06	0.204906	0.00233	0.716581	0.437327	0.716581	0.115897	500
BA_PE_APIP_Large_IP_MeanTotalBoutIntake_mg	BA_PE_APIP_Large_IP_MeanTotalBoutIntake_mg	308	644.531	746.163	836.071	656.839	409.027	628.377	421.255	713.967	1095.97	243.3	853.955	586.553	459.902	347.618	1243.91	415.488	449.951	1183.09	1184.52	758.483	847.933	434.845	880.155	748.065	0.204906	0.002326	0.432167	0.329908	0.432167	-0.21124	322
BA_PE_APIP_Large_IP_BoutNumber	BA_PE_APIP_Large_IP_BoutNumber	309	5.61538	4.9787	5.30769	7.84615	3.46154	5.33333	6.84615	6.92308	9.30769	2.30769	3.66667	5.15385	2.46154	7.36364	8.07692	4.25	5.46154	6.23077	5.30769	3.15385	4.76923	2.9	3.69231	6.07692	0.298919	0.002858	0.455122	0.341717	0.455122	0.173616	490
BA_PE_APIP_Large_IP_BoutProbability	BA_PE_APIP_Large_IP_BoutProbability	310	0.812475	0.751208	0.518797	0.927273	0.849057	0.888889	0.618056	0.918367	0.834483	0.789474	0.942857	0.8375	0.695652	0.870968	0.719178	0.980769	0.682692	0.826531	0.616071	0.891304	0.673913	0.630435	0.8	0.626984	0.124267	0.001748	0.279947	0.252064	0.279947	0.113111	484
BA_PE_APIP_Large_IP_BoutPerCumIntake	BA_PE_APIP_Large_IP_BoutPerCumIntake	311	98.1743	98.0604	88.549	99.4614	99.3024	99.6275	96.8463	99.8391	99.6973	99.3132	99.9166	99.1906	98.3139	99.5331	99.3086	99.6579	98.6864	99.6212	90.873	99.2766	97.8326	97.622	99.2539	96.7455	0.088231	0.001553	0.929322	0.499103	0.929322	0.001676	606
BA_PE_APIP_Large_IP_BoutMeanDur_ms	BA_PE_APIP_Large_IP_BoutMeanDur_ms	312	178069	190963	199762	184210	246043	109052	100811	212674	155384	253782	143700	175276	252613	73885.7	137556	194862	77134.2	135483	142353	147793	501178	233194	197821	197688	0.35843	0.003267	0.742359	0.444152	0.742359	-0.100856	566
BA_PE_APIP_Large_IP_BoutStdDur_ms	BA_PE_APIP_Large_IP_BoutStdDur_ms	313	85407.6	89154.4	62277.6	121967	96757.3	68660.3	53411.3	129158	119270	84668.7	42934	74972.4	98013.1	36611.9	102022	60377.7	44524.7	112117	31326.1	59727.9	269455	95562.2	82849.2	77266.7	0.310464	0.002926	0.864913	0.485651	0.864913	-0.061942	696
BA_PE_APIP_Large_IP_BoutStdSize_mg	BA_PE_APIP_Large_IP_BoutStdSize_mg	314	77.0108	84.5944	54.2074	62.6969	84.4797	78.3547	35.1938	86.9341	127.466	51.8884	84.2662	104.622	87.9817	30.009	104.075	53.8315	60.8018	141.167	54.9063	128.377	99.6042	70.8137	134.787	48.779	0.334108	0.003118	0.59689	0.399533	0.59689	-0.135501	685
BA_PE_APIP_Large_IP_BoutStdIntensity_mgs	BA_PE_APIP_Large_IP_BoutStdIntensity_mgs	315	0.253293	0.298415	0.183875	0.100866	0.192388	0.363515	0.355523	0.190293	0.30645	0.090761	0.333215	0.416042	0.168258	0.376474	0.483948	0.243826	0.274283	0.361439	0.206321	0.66348	0.101311	0.122572	0.372762	0.206309	0.224139	0.002394	0.470777	0.348315	0.470777	-0.236516	740
BA_PE_APIP_Large_IP_BoutSlopeIntensity_mgs	BA_PE_APIP_Large_IP_BoutSlopeIntensity_mgs	316	0.779833	0.872623	0.681419	0.480393	0.675488	0.996501	0.428641	0.548416	0.980207	0.542063	1.6611	0.804099	0.777558	0.401989	0.814988	0.431507	1.24102	1.17759	1.44488	1.47578	0.31982	0.692051	1.35599	0.338299	0.38334	0.003419	0.605668	0.403633	0.605668	-0.162194	56
BA_PE_APIP_AP_BoutThresh_mg	BA_PE_APIP_AP_BoutThresh_mg	317	8.10102	20.9909	9.26985	2.1623	5.82179	13.0092	5.69865	4.90105	5.91669	12.7866	9.22781	12.2163	48.8566	36.8207	12.8785	3.39472	27.1942	14.3919	39.1213	8.25741	34.9421	7.38906	9.22781	9.41613	0.017427	0.000566	0.018458	0.058925	0.018458	-1.37359	122
BA_PE_APIP_IP_BoutThresh_mg	BA_PE_APIP_IP_BoutThresh_mg	318	18.9354	33.3552	71.717	12.5422	15.2911	10.9566	12.749	5.56876	5.74009	18.3401	21.8353	14.6137	36.4507	4.98314	19.2902	18.5178	11.6411	10.9566	110.727	42.4138	43.7188	31.6439	31.9652	37.9536	0.046341	0.001113	0.179623	0.218662	0.179623	-0.816826	112
BA_PE_APIP_Large_TotalDur_ms	BA_PE_APIP_Large_TotalDur_ms	319	343966	313492	391134	357862	321102	382598	285669	357242	309050	319306	304659	411039	388767	278232	472061	186148	222595	261614	213180	282641	529528	245777	281670	399694	0.068957	0.001429	0.414397	0.320632	0.414397	0.133836	46
BA_PE_APIP_Large_TotalIntake_mg	BA_PE_APIP_Large_TotalIntake_mg	320	4462.58	3935.52	4517.66	4357.43	4618.02	5287.27	4184.99	4174	4418.79	4616.01	4005.34	4446.25	3731.69	4232.32	5471.72	3974.78	3665.38	3893.89	3432.29	4381.49	3242.67	3905.1	3238.29	4056.58	0.003106	0.000272	0.024406	0.067524	0.024406	0.181324	859
BA_PE_APIP_Large_Number	BA_PE_APIP_Large_Number	321	63.7026	44.6838	63.6154	45.6154	74.3077	73.3333	74.3846	46.9231	74.3846	88.7692	44	51.6923	40.2308	51.1818	48.6154	29.9167	34.1538	52.6154	24.6154	46.6154	35.3846	77.8	40.5385	54.5385	0.011456	0.000548	0.007031	0.042798	0.007031	0.511598	856
BA_PE_APIP_Large_Probability	BA_PE_APIP_Large_Probability	322	0.722369	0.774256	0.729921	0.71532	0.66805	0.570687	0.575253	0.800525	0.907129	0.800277	0.714801	0.741722	0.887946	0.781944	0.761446	0.713718	0.8117	0.8758	0.816327	0.590068	0.725552	0.89118	0.851373	0.58402	0.099258	0.001591	0.258208	0.252945	0.258208	-0.100076	887
BA_PE_APIP_Large_PerCumIntake	BA_PE_APIP_Large_PerCumIntake	323	95.4784	96.9599	96.7538	97.6666	94.2453	90.639	89.4817	96.3802	99.3846	97.7331	96.6436	95.8561	99.6138	97.8058	97.7094	94.8258	98.654	98.8682	98.2813	93.5294	95.1573	98.8632	99.2873	90.9234	0.078144	0.001525	0.251353	0.251079	0.251353	-0.022214	884
BA_PE_APIP_Large_Dur_ms	BA_PE_APIP_Large_Dur_ms	324	5761.34	7470.51	6148.41	7845.21	4321.24	5217.24	3840.43	7613.35	4154.75	3597.03	6924.08	7951.66	9663.42	5436.14	9710.12	6222.23	6517.43	4972.2	8660.43	6063.26	14964.9	3159.08	6948.23	7328.67	0.099258	0.001588	0.131004	0.186304	0.131004	-0.374802	873
BA_PE_APIP_Large_Size_mg	BA_PE_APIP_Large_Size_mg	325	73.4452	94.3095	71.0152	95.5255	62.1472	72.0992	56.2615	88.9542	59.4046	52.0001	91.0305	86.0137	92.7571	82.6919	112.551	132.862	107.32	74.0066	139.437	93.9924	91.6407	50.1941	79.882	74.3802	0.022157	0.000661	0.036177	0.084692	0.036177	-0.360736	870
BA_PE_APIP_Large_MeanIntensity_mgs	BA_PE_APIP_Large_MeanIntensity_mgs	326	15.9941	15.779	15.6934	14.9734	17.6042	16.9113	16.8939	14.2521	17.3199	17.8507	15.3554	13.0866	13.372	16.8013	12.3954	22.7496	17.5725	20.2547	16.7591	17.5469	7.18745	18.6618	14.4249	11.6223	0.48685	0.00387	0.88057	0.489625	0.88057	0.019533	877
BA_PE_APIP_Large_RatioIntensity_mgs	BA_PE_APIP_Large_RatioIntensity_mgs	327	13.098	13.6971	11.5502	12.1763	14.3818	13.8194	14.6498	11.684	14.298	14.4564	13.147	10.8171	9.59878	15.2115	11.5911	21.3528	16.4665	14.8841	16.1004	15.502	6.1237	15.8888	11.4967	10.1492	0.204906	0.002323	0.661404	0.424062	0.661404	-0.06453	880
BA_PE_APIP_Small_MeanTotalBoutDur_ms	BA_PE_APIP_Small_MeanTotalBoutDur_ms	328	309269	372337	292089	59424.6	435266	283513	498968	90932.5	53602.7	807341	122911	448638	674208	880832	181359	96083.9	189707	90192.8	263876	80998.5	1.36037e+06	141111	128492	380818	0.460606	0.003788	0.668128	0.424793	0.668128	-0.267748	678
BA_PE_APIP_Small_MeanTotalBoutIntake_mg	BA_PE_APIP_Small_MeanTotalBoutIntake_mg	329	115.427	192.913	171.085	14.8472	106.132	193.793	112.857	41.808	41.094	224.238	72.1031	176.319	397.826	481.96	140.245	33.0048	139.219	82.542	252.373	101.579	336.46	75.1298	90.0596	184.559	0.138302	0.001819	0.137599	0.192682	0.137599	-0.740965	689
BA_PE_APIP_Small_BoutNumber	BA_PE_APIP_Small_BoutNumber	330	48.6244	49.407	52.8462	19.7692	76.0769	48.8333	76.3846	34.1538	29.8462	61.0769	40.3333	46.9231	76.0769	38.2727	55.2308	30.25	72	26	33.6154	45.6923	46.1538	43.9	42.7692	82.9231	0.447541	0.003741	0.92275	0.497916	0.92275	-0.023037	511
BA_PE_APIP_Small_BoutProbability	BA_PE_APIP_Small_BoutProbability	331	0.338508	0.528655	0.41967	0.122206	0.378927	0.298371	0.37771	0.252416	0.329932	0.373471	0.480795	0.351585	0.760184	0.485582	0.520667	0.240238	0.70535	0.39486	0.606103	0.429501	0.61287	0.488864	0.522556	0.577088	0.000868	0.000222	0.001731	0.024699	0.001731	-0.643136	595
BA_PE_APIP_Small_BoutPerCumIntake	BA_PE_APIP_Small_BoutPerCumIntake	332	2.71564	4.89617	4.16499	0.379948	2.45939	3.83747	2.88806	1.00649	0.884474	5.6494	1.8076	4.07854	11.2185	11.2084	2.85765	0.801736	3.28466	1.94041	5.91145	2.34968	10.2676	1.91658	2.69764	4.29976	0.124267	0.001744	0.113179	0.177548	0.113179	-0.850363	777
BA_PE_APIP_Small_BoutMeanDur_ms	BA_PE_APIP_Small_BoutMeanDur_ms	333	5687.79	7862.4	5527.16	3005.91	5721.39	5805.73	6532.31	2662.44	1795.97	13218.4	3047.37	9561.14	8862.19	23014.6	3283.65	3176.33	2634.82	3468.96	7849.84	1772.69	29474.6	3214.36	3004.3	4592.43	0.48685	0.003865	0.478981	0.35041	0.478981	-0.467102	775
BA_PE_APIP_Small_BoutMeanSize_mg	BA_PE_APIP_Small_BoutMeanSize_mg	334	2.26471	4.13535	3.23741	0.751026	1.39506	3.96845	1.47748	1.22411	1.37686	3.67139	1.78768	3.75761	5.22926	12.5928	2.53925	1.09107	1.9336	3.17469	7.50768	2.2231	7.28998	1.71138	2.10571	2.22566	0.078144	0.00152	0.117636	0.176069	0.117636	-0.868683	215
BA_PE_APIP_Small_BoutMeanIntensity_mgs	BA_PE_APIP_Small_BoutMeanIntensity_mgs	335	0.925242	1.18988	0.781983	0.548332	0.618561	1.17521	0.722973	0.92819	1.62913	0.370124	1.59033	0.887576	0.852248	0.738856	1.40554	0.708437	0.962332	2.30018	1.35954	2.1834	0.368386	0.956371	1.68953	0.753697	0.153381	0.001948	0.259516	0.249409	0.259516	-0.36291	151
BA_PE_APIP_Small_BoutRatioIntensity_mgs	BA_PE_APIP_Small_BoutRatioIntensity_mgs	336	0.447293	0.673237	0.585728	0.249849	0.243833	0.68354	0.22618	0.45977	0.766641	0.277748	0.58663	0.393008	0.590065	0.547164	0.7733	0.3435	0.733863	0.915173	0.956411	1.25408	0.247331	0.532418	0.700898	0.484638	0.025877	0.000749	0.04489	0.098996	0.04489	-0.589894	77
BA_PE_APIP_Small_BoutSlopeIntensity_mgs	BA_PE_APIP_Small_BoutSlopeIntensity_mgs	337	0.23983	0.411576	0.595163	0.175871	0.112542	0.415063	0.099226	0.153705	0.145232	0.234544	0.183527	0.283431	0.588608	0.41112	0.318229	0.13524	0.67913	0.333317	0.997505	0.458536	0.185025	0.280002	0.236937	0.315268	0.018899	0.000599	0.068305	0.131568	0.068305	-0.779146	11
BA_PE_APIP_Small_AP_MeanTotalBoutDur_ms	BA_PE_APIP_Small_AP_MeanTotalBoutDur_ms	338	280740	343900	129826	50027.2	411791	277777	458124	86089.3	37826.3	802276	122414	431246	658601	875946	168748	88458	182940	87490.9	156119	74298.1	1.28537e+06	114734	109701	324396	0.408742	0.003564	0.6622	0.423383	0.6622	-0.292755	183
BA_PE_APIP_Small_AP_MeanTotalBoutIntake_mg	BA_PE_APIP_Small_AP_MeanTotalBoutIntake_mg	339	101.2	174.934	62.9656	11.2901	103.259	191.443	99.1392	40.6571	37.7668	222.555	71.3906	171.532	389.939	480.329	131.585	31.5784	133.23	78.0431	133.404	96.0515	317.675	64.5372	83.4437	159.394	0.124267	0.001741	0.152533	0.203601	0.152533	-0.789605	101
BA_PE_APIP_Small_AP_BoutNumber	BA_PE_APIP_Small_AP_BoutNumber	340	47.0893	47.6162	47.9231	19.1538	75.4615	48.1667	72.1538	33.5385	28	60.4615	40.1111	45.9231	75	37.1818	52.0769	30.1667	69.4615	24.6923	30.3077	45.3077	43.8462	42.2	41.8462	79.3077	0.460606	0.003783	0.94652	0.504187	0.94652	-0.016053	35
BA_PE_APIP_Small_AP_BoutProbability	BA_PE_APIP_Small_AP_BoutProbability	341	0.345988	0.551953	0.414229	0.124937	0.383653	0.305497	0.377465	0.262492	0.353055	0.376437	0.501389	0.360725	0.776892	0.528424	0.549067	0.248115	0.738348	0.423483	0.646962	0.440539	0.642616	0.495305	0.541833	0.591848	0.000868	0.000214	0.001102	0.020127	0.001102	-0.673823	729
BA_PE_APIP_Small_AP_BoutPerCumIntake	BA_PE_APIP_Small_AP_BoutPerCumIntake	342	2.72675	5.45948	1.99038	0.347678	2.6453	4.332	2.8548	1.18233	1.06479	5.97584	2.27778	4.59658	12.6671	12.1579	3.6	0.853527	3.52225	2.54522	4.49815	2.69878	13.1804	1.85742	3.40352	4.52943	0.078144	0.001516	0.085055	0.152865	0.085055	-1.00158	718
BA_PE_APIP_Small_AP_BoutMeanDur_ms	BA_PE_APIP_Small_AP_BoutMeanDur_ms	343	5252.37	7518.87	2709.05	2611.86	5456.97	5766.99	6349.27	2566.88	1350.94	13269.2	3051.88	9390.62	8781.34	23558.4	3240.36	2932.31	2633.68	3543.25	5151.15	1639.86	29315.4	2718.8	2621.53	4090.35	0.434533	0.003674	0.470486	0.348665	0.470486	-0.517548	146
BA_PE_APIP_Small_AP_BoutMeanSize_mg	BA_PE_APIP_Small_AP_BoutMeanSize_mg	344	2.03773	3.83915	1.31389	0.589444	1.36836	3.9746	1.374	1.21225	1.34881	3.68093	1.77982	3.73521	5.19919	12.9184	2.52674	1.0468	1.91804	3.16063	4.40164	2.11998	7.24522	1.52932	1.99406	2.00982	0.030106	0.000804	0.126167	0.182264	0.126167	-0.913823	730
BA_PE_APIP_Small_AP_BoutMeanIntensity_mgs	BA_PE_APIP_Small_AP_BoutMeanIntensity_mgs	345	0.93358	1.18	0.783359	0.554447	0.621599	1.18029	0.719191	0.935171	1.68613	0.369992	1.59027	0.895362	0.855335	0.732163	1.42559	0.709877	0.959734	2.11581	1.37604	2.18396	0.368495	0.966603	1.70589	0.760455	0.153381	0.001944	0.281271	0.252261	0.281271	-0.337935	721
BA_PE_APIP_Small_AP_BoutRatioIntensity_mgs	BA_PE_APIP_Small_AP_BoutRatioIntensity_mgs	346	0.459608	0.675534	0.485	0.22568	0.250755	0.689198	0.216402	0.472266	0.998426	0.277404	0.583189	0.397759	0.592072	0.548355	0.779771	0.356987	0.728272	0.892014	0.854497	1.29279	0.247147	0.562496	0.760648	0.491357	0.025877	0.000745	0.070118	0.133928	0.070118	-0.555624	708
BA_PE_APIP_Small_AP_BoutSlopeIntensity_mgs	BA_PE_APIP_Small_AP_BoutSlopeIntensity_mgs	347	0.213891	0.352194	0.273681	0.085272	0.119118	0.417611	0.094404	0.155935	0.287301	0.233837	0.182863	0.288888	0.589718	0.408148	0.307899	0.092357	0.678655	0.330781	0.580149	0.299254	0.181485	0.242566	0.251349	0.263968	0.030106	0.000801	0.043787	0.097508	0.043787	-0.719494	710
BA_PE_APIP_Small_IP_MeanTotalBoutDur_ms	BA_PE_APIP_Small_IP_MeanTotalBoutDur_ms	348	28528.8	28437.1	162263	9397.46	23474.6	5736.17	40843.5	4843.23	15776.4	5065	496.444	17391.8	15607.2	4885.91	12610.8	7625.92	6767.62	2701.92	107756	6700.38	74998.9	26377.1	18790.9	56422.5	0.334108	0.003113	0.995876	0.5172	0.995876	0.004644	732
BA_PE_APIP_Small_IP_MeanTotalBoutIntake_mg	BA_PE_APIP_Small_IP_MeanTotalBoutIntake_mg	349	14.2276	17.979	108.119	3.55709	2.87323	2.34938	13.7175	1.15096	3.32725	1.68259	0.71255	4.78635	7.88734	1.6306	8.65992	1.42642	5.98945	4.49892	118.97	5.52712	18.7855	10.5926	6.61588	25.1646	0.040288	0.001	0.792339	0.461358	0.792339	-0.33762	820
BA_PE_APIP_Small_IP_BoutNumber	BA_PE_APIP_Small_IP_BoutNumber	350	1.53504	1.7908	4.92308	0.615385	0.615385	0.666667	4.23077	0.615385	1.84615	0.615385	0.222222	1	1.07692	1.09091	3.15385	0.083333	2.53846	1.30769	3.30769	0.384615	2.30769	1.7	0.923077	3.61538	0.169481	0.002065	0.677978	0.428668	0.677978	-0.222327	816
BA_PE_APIP_Small_IP_BoutProbability	BA_PE_APIP_Small_IP_BoutProbability	351	0.187525	0.248792	0.481203	0.072727	0.150943	0.111111	0.381944	0.081633	0.165517	0.210526	0.057143	0.1625	0.304348	0.129032	0.280822	0.019231	0.317308	0.173469	0.383929	0.108696	0.326087	0.369565	0.2	0.373016	0.124267	0.001737	0.279947	0.252562	0.279947	-0.407858	818
BA_PE_APIP_Small_IP_BoutPerCumIntake	BA_PE_APIP_Small_IP_BoutPerCumIntake	352	1.82566	1.93962	11.451	0.538629	0.697555	0.372487	3.15365	0.160946	0.302671	0.686821	0.083372	0.809408	1.68609	0.466886	0.691374	0.342137	1.31365	0.378828	9.12704	0.723436	2.16743	2.37803	0.746064	3.25448	0.088231	0.001549	0.929322	0.498516	0.929322	-0.087359	783
BA_PE_APIP_Small_IP_BoutMeanDur_ms	BA_PE_APIP_Small_IP_BoutMeanDur_ms	353	14890.7	21099.2	32959.8	15270.9	38146.2	8604.25	9653.91	7870.25	8545.54	8230.62	2234	17391.8	14492.4	4478.75	3998.54	91511	2666.03	2066.18	32577.4	17421	32499.5	15515.9	20356.8	15606.2	0.38334	0.003414	0.472565	0.347946	0.472565	-0.502772	143
BA_PE_APIP_Small_IP_BoutStdDur_ms	BA_PE_APIP_Small_IP_BoutStdDur_ms	354	15985.5	18072.8	33908.8	7300.7	36714.8	10567.9	16551.9	10796.8	12572	12157.4	2875.1	16409.5	13001.1	8548.85	6751.23	0	2622.31	2400.24	31842.5	28823.1	46428.9	23010.5	34118.3	19326.6	0.51315	0.003952	0.7175	0.43672	0.7175	-0.177058	144
BA_PE_APIP_Small_IP_BoutStdSize_mg	BA_PE_APIP_Small_IP_BoutStdSize_mg	355	5.33897	9.10679	22.4946	3.9077	3.65645	3.7351	3.6452	1.70512	1.55194	4.46012	4.02715	4.20628	7.30144	1.3746	3.4852	0	2.19212	2.38956	39.3228	15.7563	12.1471	8.56028	8.45853	8.29352	0.265523	0.002637	0.333128	0.279547	0.333128	-0.770382	719
BA_PE_APIP_Small_IP_BoutStdIntensity_mgs	BA_PE_APIP_Small_IP_BoutStdIntensity_mgs	356	0.363165	1.19316	0.287282	0.140657	0.263339	0.613856	0.469884	0.411764	0.632553	0.153956	0.259152	0.399208	0.362214	0.552512	0.557943	0	0.295512	9.00251	0.521597	1.15409	0.187908	0.424162	0.979513	0.279961	0.138302	0.001815	0.305407	0.266067	0.305407	-1.71609	567
BA_PE_APIP_Small_IP_BoutSlopeIntensity_mgs	BA_PE_APIP_Small_IP_BoutSlopeIntensity_mgs	357	0.37874		0.60654	0.469725	0.082772	0.346904	0.1171	0.138369	0.082835	0.361949	1.4007	0.180507	0.504146	0.108021	0.446482		0.710739	0.817783	1.13843	0.517126	0.245273	0.290615	0.208864	0.371396			0.490306	0.357549	0.490306		607
BA_LE_APIP_Small_TotalDur_ms	BA_LE_APIP_Small_TotalDur_ms	358	14838.6	10422.1	22072.8	7577.46	15378.2	29409	27051.5	12331	1377.15	6788.85	9305.44	17095	723.538	6162.55	11007	11586.2	3010.08	3442	5524	20442.8	20120.2	2149	2690.23	38207.8	0.078144	0.001511	0.325139	0.275886	0.325139	0.509711	485
BA_LE_APIP_Small_TotalIntake_mg	BA_LE_APIP_Small_TotalIntake_mg	359	219.817	129.202	151.575	104.105	281.982	546.059	491.933	156.764	27.3625	107.069	139.103	192.215	14.4663	94.9487	128.276	216.885	50.0079	44.5761	60.0213	303.122	165.023	44.9019	23.2457	404.954	0.068957	0.001425	0.164203	0.211153	0.164203	0.76667	491
BA_LE_APIP_Small_Number	BA_LE_APIP_Small_Number	360	26.5722	14.058	23.5385	18.1538	36.9231	55.1667	54.9231	11.6923	7.61538	22.1538	17.5556	18	5.07692	14.2727	15.2308	12	7.92308	7.46154	5.53846	32.3846	13.3846	9.5	7.07692	38.8462	0.011457	0.000508	0.047304	0.102344	0.047304	0.918529	323
BA_LE_APIP_Small_Probability	BA_LE_APIP_Small_Probability	361	0.277631	0.225744	0.270079	0.28468	0.33195	0.429313	0.424747	0.199475	0.092871	0.199723	0.285199	0.258278	0.112054	0.218056	0.238554	0.286282	0.1883	0.1242	0.183673	0.409932	0.274448	0.10882	0.148627	0.41598	0.099258	0.001584	0.258208	0.251327	0.258208	0.298484	581
BA_LE_APIP_Small_PerCumIntake	BA_LE_APIP_Small_PerCumIntake	362	4.52161	3.04008	3.24625	2.33338	5.75474	9.36101	10.5183	3.61978	0.615418	2.26693	3.35638	4.14394	0.386165	2.19419	2.29064	5.1742	1.34597	1.13182	1.71867	6.47058	4.84266	1.13676	0.712723	9.07656	0.078144	0.001507	0.251353	0.252738	0.251353	0.57273	501
BA_LE_APIP_Small_Dur_ms	BA_LE_APIP_Small_Dur_ms	363	581.894	652.124	937.732	417.403	416.492	533.094	492.535	1054.62	180.838	306.441	530.057	949.722	142.515	431.771	722.682	965.514	379.913	461.299	997.389	631.249	1503.24	226.211	380.141	983.566	0.408742	0.00356	0.649064	0.419687	0.649064	-0.16439	401
BA_LE_APIP_Small_Size_mg	BA_LE_APIP_Small_Size_mg	364	7.91019	8.2705	6.43945	5.73459	7.63702	9.89835	8.95677	13.4075	3.59305	4.83297	7.9236	10.6786	2.84943	6.65246	8.42215	18.0738	6.31168	5.97412	10.8372	9.36005	12.3293	4.72652	3.28472	10.4246	0.51315	0.003947	0.82482	0.474819	0.82482	-0.064261	311
BA_LE_APIP_Small_MeanIntensity_mgs	BA_LE_APIP_Small_MeanIntensity_mgs	365	38.763	52.8652	39.5516	38.8714	35.192	35.4295	30.1231	29.3173	73.463	42.5567	37.9198	25.2054	94.4887	37.1539	34.2106	54.6743	61.9701	81.6804	35.9923	45.3537	16.1542	81.2087	61.355	30.1409	0.078144	0.001503	0.113427	0.176722	0.113427	-0.447639	373
BA_LE_APIP_Small_RatioIntensity_mgs	BA_LE_APIP_Small_RatioIntensity_mgs	366	15.0241	14.114	6.86704	13.7387	18.3366	18.5677	18.185	12.713	19.8688	15.7713	14.9486	11.2439	19.9939	15.4074	11.654	18.7193	16.6135	12.9506	10.8656	14.8278	8.20184	20.8943	8.6408	10.5987	0.334108	0.003109	0.617334	0.409613	0.617334	0.090152	419
BA_PE_DCLC_Large_MeanTotalBoutDur_ms	BA_PE_DCLC_Large_MeanTotalBoutDur_ms	367	6.32016e+06	4.79113e+06	5.10316e+06	8.36057e+06	7.8138e+06	5265036	6814078	7.38287e+06	5.66305e+06	9.1236e+06	2.66921e+06	5006218	4.15292e+06	4.49876e+06	4.06277e+06	7.8762e+06	3.92346e+06	3.37731e+06	2.86154e+06	3.52301e+06	8.04968e+06	5.32464e+06	3.34896e+06	6.49429e+06	0.040288	0.000996	0.067442	0.133279	0.067442	0.399596	291
BA_PE_DCLC_Large_MeanTotalBoutIntake_mg	BA_PE_DCLC_Large_MeanTotalBoutIntake_mg	368	4120.91	3873.27	3931.09	3892.09	4209.25	4856.21	3794.84	4112.04	4605.06	3744.99	3916.79	4146.76	3148.33	3829.75	4767.45	4083.13	4101.93	4171.3	4016.86	4221.5	2940.46	3843.85	3248.4	4106.25	0.224139	0.00239	0.217757	0.235003	0.217757	0.089412	301
BA_PE_DCLC_Large_BoutRate_onperms	BA_PE_DCLC_Large_BoutRate_onperms	369	1e-06	1e-06	1e-06	2e-06	2e-06	1e-06	2e-06	1e-06	1e-06	1e-06	1e-06	1e-06	0	0	1e-06	1e-06	0	0	0	1e-06	0	1e-06	0	1e-06	0.000549	0.000332	0.000151	0.009858	0.000151	1.11072	387
BA_PE_DCLC_Large_BoutRate_onperactms	BA_PE_DCLC_Large_BoutRate_onperactms	370	3e-06	2e-06	2e-06	5e-06	4e-06	3e-06	4e-06	4e-06	2e-06	3e-06	2e-06	3e-06	1e-06	2e-06	2e-06	4e-06	1e-06	1e-06	1e-06	3e-06	1e-06	2e-06	1e-06	2e-06	0.001084	0.000225	0.000407	0.014284	0.000407	0.92677	145
BA_PE_DCLC_Large_BoutNumber	BA_PE_DCLC_Large_BoutNumber	371	97.4389	44.9125	72.7692	141.923	124.692	114.833	125.846	101.154	60.6154	102.462	43.5556	86.5385	24	41.1818	50.8462	95.5833	30.2308	39.8462	21.8462	60.6923	29.1538	45.8	39.0769	60.6923	0.000549	0.000914	0.000129	0.029406	0.000129	1.11738	876
BA_PE_DCLC_Large_BoutProbability	BA_PE_DCLC_Large_BoutProbability	372	0.6612	0.47195	0.577886	0.877318	0.621073	0.701629	0.62229	0.747584	0.670068	0.626529	0.519205	0.648415	0.239816	0.522491	0.479333	0.7591	0.296157	0.60514	0.393897	0.570499	0.38713	0.510022	0.477444	0.422377	0.001084	0.000219	0.001802	0.022844	0.001802	0.486451	883
BA_PE_DCLC_Large_BoutPerCumIntake	BA_PE_DCLC_Large_BoutPerCumIntake	373	97.269	95.1256	95.7007	99.6008	97.5406	96.1625	97.1119	98.9935	99.1155	94.3506	98.1924	95.9215	88.7815	89.064	97.1424	99.1852	96.7787	98.0596	94.0885	97.6503	89.7324	98.0574	97.3024	95.6653	0.124267	0.001733	0.116176	0.177373	0.116176	0.032146	869
BA_PE_DCLC_Large_BoutMeanDur_ms	BA_PE_DCLC_Large_BoutMeanDur_ms	374	66628.7	119436	70128	58909.1	62664.6	45849.4	54146.1	72986.5	93426	89044.2	61283	57849.6	173038	109241	79903.3	82401.3	129784	84758.8	130986	58047	276110	116258	85701.8	107004	0.001672	0.000232	0.011244	0.048887	0.011244	-0.842025	804
BA_PE_DCLC_Large_BoutMeanSize_mg	BA_PE_DCLC_Large_BoutMeanSize_mg	375	47.8664	99.169	54.0213	27.424	33.7571	42.2892	30.1546	40.6513	75.9718	36.5502	89.9262	47.9181	131.18	92.9962	93.7622	42.718	135.687	104.685	183.87	69.5557	100.86	83.9269	83.1284	67.6569	0.000549	0.000305	0.000898	0.020488	0.000898	-1.05088	793
BA_PE_DCLC_Large_BoutMeanIntensity_mgs	BA_PE_DCLC_Large_BoutMeanIntensity_mgs	376	0.748755	0.95867	0.765574	0.47731	0.562476	0.972157	0.578565	0.568656	0.833515	0.422887	1.45798	0.848425	0.764603	0.88215	1.277	0.537448	1.06986	1.47564	1.3936	1.30235	0.393345	0.726617	1.02086	0.660564	0.099258	0.00158	0.15686	0.205178	0.15686	-0.356542	815
BA_PE_DCLC_Large_BoutRatioIntensity_mgs	BA_PE_DCLC_Large_BoutRatioIntensity_mgs	377	0.733014	0.906107	0.770325	0.46553	0.538695	0.92235	0.556911	0.55697	0.813176	0.410473	1.46739	0.828322	0.7581	0.85129	1.17345	0.518413	1.04549	1.2351	1.40374	1.19826	0.36529	0.721899	0.969973	0.632286	0.11126	0.001645	0.213564	0.234356	0.213564	-0.30584	794
BA_PE_DCLC_Large_BoutSlopeIntensity_mgs	BA_PE_DCLC_Large_BoutSlopeIntensity_mgs	378	0.735762	0.86842	0.792408	0.456622	0.527807	0.863931	0.536344	0.556795	0.931132	0.380621	1.56922	0.742745	0.722397	0.775272	0.907377	0.575804	1.00181	1.07549	1.45246	1.19404	0.310046	0.715333	1.11865	0.572361	0.11126	0.001641	0.35944	0.29406	0.35944	-0.239153	193
BA_PE_DCLC_Large_BoutMeanSize_evtnum	BA_PE_DCLC_Large_BoutMeanSize_evtnum	379	32.185	40.8609	18.889	11.6916	41.0598	40.7068	32.827	35.4829	29.736	57.3694	21.3597	32.728	101.112	32.5099	16.5431	33.5955	60.3003	20.5541	23.6408	17.9087	86.1003	31.6157	39.2579	27.1926	0.48685	0.003861	0.370816	0.299078	0.370816	-0.344332	828
BA_PE_DCLC_Large_BoutMeanSize_evtdur	BA_PE_DCLC_Large_BoutMeanSize_evtdur	380	39912.7	79462.9	57166.7	39299.4	28932.2	24762	29211.3	36780.3	44996.9	63598.3	42149.3	32230.4	106681	83783.7	64500.3	48622.6	111457	51661.2	99801.8	27781.6	180700	72862.6	34383.9	71318.7	0.003787	0.00028	0.00934	0.048452	0.00934	-0.993434	839
BA_PE_DCLC_Large_DC_MeanTotalBoutDur_ms	BA_PE_DCLC_Large_DC_MeanTotalBoutDur_ms	381	5.30269e+06	3.80299e+06	3.93432e+06	6.86482e+06	6876290	4.56981e+06	6119267	5.795e+06	4.1821e+06	8.49288e+06	2.1273e+06	4.0651e+06	3.47555e+06	3.83938e+06	2.83423e+06	6.96139e+06	3.47727e+06	2.22723e+06	2.08391e+06	3.0286e+06	5.38262e+06	4.6072e+06	2.51879e+06	5199662	0.030106	0.000798	0.047802	0.100561	0.047802	0.479591	862
BA_PE_DCLC_Large_DC_MeanTotalBoutIntake_mg	BA_PE_DCLC_Large_DC_MeanTotalBoutIntake_mg	382	3433.86	3046.94	3009.75	3207.69	3763.87	4102.81	3371.68	3347.6	3484.77	3484.86	3034.34	3531.21	2645.77	3415.17	3381.93	3636.97	3628.18	2675.7	2799.4	3436.26	1994.19	3390.45	2262.33	3296.88	0.088231	0.001545	0.066133	0.131833	0.066133	0.172471	257
BA_PE_DCLC_Large_DC_BoutRate_onperms	BA_PE_DCLC_Large_DC_BoutRate_onperms	383	2e-06	1e-06	2e-06	3e-06	3e-06	2e-06	3e-06	2e-06	1e-06	2e-06	1e-06	2e-06	0	1e-06	1e-06	2e-06	1e-06	1e-06	0	1e-06	1e-06	1e-06	1e-06	1e-06	0.000549	0.000281	0.000138	0.012625	0.000138	1.21921	262
BA_PE_DCLC_Large_DC_BoutRate_onperactms	BA_PE_DCLC_Large_DC_BoutRate_onperactms	384	4e-06	2e-06	2e-06	6e-06	5e-06	4e-06	4e-06	4e-06	3e-06	3e-06	2e-06	3e-06	1e-06	2e-06	2e-06	4e-06	1e-06	1e-06	1e-06	3e-06	1e-06	2e-06	1e-06	2e-06	0.000549	0.000261	0.000235	0.008928	0.000235	1.03043	237
BA_PE_DCLC_Large_DC_BoutNumber	BA_PE_DCLC_Large_DC_BoutNumber	385	91.3521	39.2391	66.9231	133.769	120.692	107.667	118.923	93.7692	50.9231	100	39.7778	81.0769	21.3077	32.7273	41.6923	90.75	24.3077	30.9231	16.3846	57.3846	23.8462	42.7	34.6923	54.1538	0.000549	0.000244	0.000138	0.015754	0.000138	1.21914	242
BA_PE_DCLC_Large_DC_BoutProbability	BA_PE_DCLC_Large_DC_BoutProbability	386	0.653348	0.445211	0.583501	0.875189	0.615294	0.691649	0.622634	0.736556	0.64775	0.623202	0.499303	0.638401	0.221246	0.473062	0.448675	0.750517	0.259868	0.560669	0.352066	0.558801	0.353075	0.504132	0.453722	0.406701	0.000868	0.000206	0.000969	0.020111	0.000969	0.553361	855
BA_PE_DCLC_Large_DC_BoutPerCumIntake	BA_PE_DCLC_Large_DC_BoutPerCumIntake	387	97.2459	94.4393	97.9637	99.65	97.3298	95.5442	97.1442	98.8001	98.9566	93.997	97.7065	95.3674	87.1549	87.9355	96.3045	99.1392	96.53	97.1918	95.4614	97.2808	86.2882	98.133	96.4432	95.4089	0.068957	0.00142	0.081796	0.148765	0.081796	0.042251	368
BA_PE_DCLC_Large_DC_BoutMeanDur_ms	BA_PE_DCLC_Large_DC_BoutMeanDur_ms	388	59345.4	110200	58788.6	51318.3	56973.7	42444.1	51455.7	61800.7	82125.8	84928.8	53479.5	50138.8	163113	117314	67979.6	76709.5	143052	72024.7	127187	52777.3	225723	107897	72603.7	96016.5	0.001349	0.000209	0.005119	0.037694	0.005119	-0.892913	416
BA_PE_DCLC_Large_DC_BoutMeanSize_mg	BA_PE_DCLC_Large_DC_BoutMeanSize_mg	389	42.5414	92.1134	44.9732	23.9793	31.1857	38.1066	28.3518	35.7004	68.432	34.8486	76.2822	43.5539	124.17	104.352	81.1164	40.0768	149.261	86.5277	170.856	59.8812	83.6273	79.4017	65.2114	60.8798	0.000549	0.000228	0.00127	0.019984	0.00127	-1.11454	288
BA_PE_DCLC_Large_DC_BoutMeanIntensity_mgs	BA_PE_DCLC_Large_DC_BoutMeanIntensity_mgs	390	0.75089	0.96183	0.762454	0.479172	0.565983	0.963242	0.572366	0.577307	0.860798	0.42332	1.44101	0.863246	0.768901	0.934884	1.2812	0.53982	1.07983	1.5244	1.3344	1.28369	0.399336	0.734228	1.00084	0.660445	0.088231	0.001541	0.150803	0.202476	0.150803	-0.357181	149
BA_PE_DCLC_Large_DC_BoutRatioIntensity_mgs	BA_PE_DCLC_Large_DC_BoutRatioIntensity_mgs	391	0.734474	0.893983	0.764998	0.467266	0.547369	0.897807	0.550995	0.57767	0.833258	0.410328	1.42638	0.868667	0.761251	0.889511	1.19325	0.522449	1.0434	1.20136	1.34334	1.1346	0.370487	0.735902	0.898184	0.634056	0.11126	0.001638	0.227728	0.241764	0.227728	-0.283535	1
BA_PE_DCLC_Large_DC_BoutSlopeIntensity_mgs	BA_PE_DCLC_Large_DC_BoutSlopeIntensity_mgs	392	0.74174	0.809929	0.819206	0.44314	0.549521	0.695447	0.535915	0.648736	0.95468	0.358111	1.42528	0.987357	0.7117	0.753555	0.951768	0.596605	0.991965	0.903464	1.39654	0.924149	0.270562	0.743415	0.881041	0.594379	0.224139	0.002386	0.594124	0.399438	0.594124	-0.126882	562
BA_PE_DCLC_Large_DC_BoutMeanSize_evtnum	BA_PE_DCLC_Large_DC_BoutMeanSize_evtnum	393	29.7329	37.5818	17.9966	10.8292	37.8744	39.4706	31.9754	30.3396	27.1843	53.4315	17.8408	30.3861	92.6968	36.5389	15.5461	30.607	68.0886	18.2264	24.1174	16.8016	62.0419	29.63	31.3747	25.3125	0.408742	0.003555	0.361733	0.294353	0.361733	-0.337977	604
BA_PE_DCLC_Large_DC_BoutMeanSize_evtdur	BA_PE_DCLC_Large_DC_BoutMeanSize_evtdur	394	35788.2	73674.2	48031.6	34010.2	26914	22261.5	27810.4	32367.7	40343.9	60769.7	35830.7	29542	101407	94617.9	54083.1	45844.1	123498	42112.4	92601.1	23825.2	146892	68409.9	26396.9	64403	0.008048	0.000435	0.007316	0.042816	0.007316	-1.04168	482
BA_PE_DCLC_Large_LC_MeanTotalBoutDur_ms	BA_PE_DCLC_Large_LC_MeanTotalBoutDur_ms	395	1.01747e+06	988142	1.16884e+06	1.49575e+06	937506	695222	694811	1.58786e+06	1.48095e+06	630722	541919	941122	677366	659381	1.22855e+06	914810	446186	1150086	777633	494406	2.66706e+06	717433	830172	1.29463e+06	0.265523	0.002633	0.895223	0.492969	0.895223	0.042197	320
BA_PE_DCLC_Large_LC_MeanTotalBoutIntake_mg	BA_PE_DCLC_Large_LC_MeanTotalBoutIntake_mg	396	687.053	826.331	921.345	684.399	445.383	753.395	423.151	764.436	1120.29	260.13	882.449	615.545	502.56	414.581	1385.52	446.155	473.745	1495.6	1217.45	785.24	946.274	453.399	986.067	809.376	0.16951	0.002018	0.343132	0.284801	0.343132	-0.266299	150
BA_PE_DCLC_Large_LC_BoutRate_onperms	BA_PE_DCLC_Large_LC_BoutRate_onperms	397	0	0	0	0	0	0	0	0	0	0	0	0	0	0	0	0	0	0	0	0	0	0	0	0	0.310464	0.002922	0.698861	0.435835	0.698861	0.091328	4
BA_PE_DCLC_Large_LC_BoutRate_onperactms	BA_PE_DCLC_Large_LC_BoutRate_onperactms	398	2e-06	2e-06	1e-06	2e-06	2e-06	2e-06	2e-06	3e-06	2e-06	2e-06	3e-06	2e-06	2e-06	4e-06	2e-06	2e-06	3e-06	2e-06	3e-06	2e-06	1e-06	2e-06	2e-06	2e-06	0.434533	0.003669	0.774876	0.456429	0.774876	-0.055626	198
BA_PE_DCLC_Large_LC_BoutNumber	BA_PE_DCLC_Large_LC_BoutNumber	399	6.08675	5.67335	5.84615	8.15385	4	7.16667	6.92308	7.38462	9.69231	2.46154	3.77778	5.46154	2.69231	8.45454	9.15385	4.83333	5.92308	8.92308	5.46154	3.30769	5.30769	3.1	4.38462	6.53846	0.322194	0.003019	0.668916	0.424703	0.668916	0.101472	166
BA_PE_DCLC_Large_LC_BoutProbability	BA_PE_DCLC_Large_LC_BoutProbability	400	0.809451	0.75134	0.520548	0.913793	0.866667	0.895833	0.616438	0.923077	0.818182	0.8	0.894737	0.845238	0.714286	0.877358	0.695906	0.966667	0.693694	0.834532	0.612069	0.895833	0.683168	0.607843	0.814286	0.620438	0.131152	0.001777	0.30153	0.263191	0.30153	0.107478	5
BA_PE_DCLC_Large_LC_BoutPerCumIntake	BA_PE_DCLC_Large_LC_BoutPerCumIntake	401	98.2196	98.0952	88.9858	99.3709	99.359	99.6754	96.856	99.8497	99.6131	99.3573	99.9008	99.2284	98.4548	99.5927	99.25	99.562	98.7272	99.6514	91.0768	99.301	97.9739	97.4956	99.3326	96.7245	0.078144	0.001498	0.92036	0.497803	0.92036	0.001829	576
BA_PE_DCLC_Large_LC_BoutMeanDur_ms	BA_PE_DCLC_Large_LC_BoutMeanDur_ms	402	175494	189200	199934	183441	234377	97007.7	100362	215023	152797	256231	143449	172318	251593	77991.3	134211	189271	75330.1	128889	142383	149472	502489	231430	189338	198002	0.35843	0.003262	0.728392	0.43867	0.728392	-0.108491	2
BA_PE_DCLC_Large_LC_BoutMeanSize_mg	BA_PE_DCLC_Large_LC_BoutMeanSize_mg	403	119.02	155.041	157.599	83.9358	111.346	105.125	61.1219	103.517	115.586	105.678	233.589	112.705	186.665	49.0365	151.359	92.3079	79.9829	167.611	222.914	237.398	178.283	146.258	224.892	123.787	0.078144	0.001494	0.139472	0.192937	0.139472	-0.381445	165
BA_PE_DCLC_Large_LC_BoutMeanIntensity_mgs	BA_PE_DCLC_Large_LC_BoutMeanIntensity_mgs	404	0.731521	0.960124	0.801296	0.446756	0.456669	1.10609	0.685055	0.458805	0.690168	0.405296	1.63668	0.628404	0.730586	0.678021	1.25787	0.492908	1.02897	1.30665	1.57122	1.62619	0.366427	0.621779	1.17932	0.661549	0.124267	0.00173	0.203705	0.228481	0.203705	-0.392322	197
BA_PE_DCLC_Large_LC_BoutRatioIntensity_mgs	BA_PE_DCLC_Large_LC_BoutRatioIntensity_mgs	405	0.734634	0.941827	0.788254	0.457562	0.475072	1.08368	0.609017	0.481424	0.756469	0.412432	1.62838	0.654054	0.741933	0.628743	1.12777	0.487702	1.06177	1.30043	1.56559	1.58825	0.354801	0.631974	1.18779	0.62518	0.124267	0.001726	0.239656	0.248644	0.239656	-0.358436	762
BA_PE_DCLC_Large_LC_BoutSlopeIntensity_mgs	BA_PE_DCLC_Large_LC_BoutSlopeIntensity_mgs	406	0.776179	0.883202	0.677545	0.480028	0.654186	0.99915	0.431734	0.551101	0.980273	0.531975	1.6558	0.799997	0.777593	0.544457	0.79767	0.445606	1.23525	1.20564	1.43315	1.42835	0.318867	0.696384	1.36931	0.346157	0.334108	0.003105	0.541437	0.377931	0.541437	-0.186354	751
BA_PE_DCLC_Large_LC_BoutMeanSize_evtnum	BA_PE_DCLC_Large_LC_BoutMeanSize_evtnum	407	78.6036	67.4381	29.1053	25.8396	137.173	59.2791	47.4556	100.792	43.1429	217.344	58.4118	67.493	167.714	16.914	21.084	89.7069	28.3377	28.6207	22.2113	37.1163	194.188	58.9677	101.632	42.7647	0.153381	0.00194	0.665673	0.423823	0.665673	0.22103	773
BA_PE_DCLC_Large_LC_BoutMeanSize_evtdur	BA_PE_DCLC_Large_LC_BoutMeanSize_evtdur	408	101483	121715	161739	126072	89829.3	62327	53276	92810.2	69443.7	178510	108680	72139.8	148424	41844.7	111946	100790	62043.1	84752.6	121404	96420.2	332588	134195	97579.1	128597	0.244359	0.002509	0.448219	0.338763	0.448219	-0.262277	817
BA_PE_DCLC_ActProb	BA_PE_DCLC_ActProb	409	0.347351	0.315202	0.428685	0.341041	0.346579	0.41459	0.391381	0.326093	0.303453	0.379418	0.215007	0.327268	0.314998	0.202788	0.406466	0.307591	0.400267	0.382752	0.199978	0.286095	0.283339	0.321833	0.329324	0.346997	0.11126	0.001634	0.259335	0.250819	0.259335	0.140118	819
BA_PE_DCLC_MeanFeedingCoeff_mgs	BA_PE_DCLC_MeanFeedingCoeff_mgs	410	1.33444	2.18363	0.975646	0.724678	1.20744	1.73693	1.16655	1.16401	2.02685	0.585352	2.15196	1.60498	1.26237	1.18581	1.63339	0.96846	1.2427	10.1742	1.85131	2.61412	0.573215	1.22184	2.49564	0.980531	0.204906	0.002319	0.321841	0.274619	0.321841	-0.710496	800
BA_PE_DCLC_LC_BoutThresh_mg	BA_PE_DCLC_LC_BoutThresh_mg	411	18.9354	33.3552	71.717	12.5422	15.2911	10.9566	12.749	5.56876	5.74009	18.3401	21.8353	14.6137	36.4507	4.98314	19.2902	18.5178	11.6411	10.9566	110.727	42.4138	43.7188	31.6439	31.9652	37.9536	0.046341	0.001109	0.179623	0.218081	0.179623	-0.816826	789
BA_PE_DCLC_DC_BoutThresh_mg	BA_PE_DCLC_DC_BoutThresh_mg	412	8.10102	20.9909	9.26985	2.1623	5.82179	13.0092	5.69865	4.90105	5.91669	12.7866	9.22781	12.2163	48.8566	36.8207	12.8785	3.39472	27.1942	14.3919	39.1213	8.25741	34.9421	7.38906	9.22781	9.41613	0.017427	0.000563	0.018458	0.058516	0.018458	-1.37359	757
BA_PE_DCLC_DC_ActProb	BA_PE_DCLC_DC_ActProb	413	0.578666	0.524254	0.639316	0.559934	0.601375	0.703427	0.664599	0.54492	0.459747	0.679902	0.386163	0.547276	0.548973	0.338504	0.638304	0.514739	0.698157	0.589031	0.326525	0.506101	0.427011	0.556626	0.563648	0.583429	0.138302	0.001811	0.248607	0.253891	0.248607	0.142464	746
BA_PE_DCLC_LC_ActProb	BA_PE_DCLC_LC_ActProb	414	0.085008	0.075003	0.186199	0.089042	0.05325	0.099217	0.077113	0.076822	0.125414	0.037131	0.030713	0.075174	0.045637	0.055102	0.139565	0.066363	0.05762	0.145481	0.054418	0.035481	0.11968	0.043781	0.060827	0.076084	0.265523	0.002629	0.579951	0.392802	0.579951	0.18064	768
BA_PE_DCLC_Large_TotalDur_ms	BA_PE_DCLC_Large_TotalDur_ms	415	6.32016e+06	4.79113e+06	5.10316e+06	8.36057e+06	7.8138e+06	5265036	6814078	7.38287e+06	5.66305e+06	9.1236e+06	2.66921e+06	5006218	4.15292e+06	4.49876e+06	4.06277e+06	7.8762e+06	3.92346e+06	3.37731e+06	2.86154e+06	3.52301e+06	8.04968e+06	5.32464e+06	3.34896e+06	6.49429e+06	0.040288	0.000993	0.067442	0.132704	0.067442	0.399596	779
BA_PE_DCLC_Large_TotalIntake_mg	BA_PE_DCLC_Large_TotalIntake_mg	416	4120.91	3873.27	3931.09	3892.09	4209.25	4856.21	3794.84	4112.04	4605.06	3744.99	3916.79	4146.76	3148.33	3829.75	4767.45	4083.13	4101.93	4171.3	4016.86	4221.5	2940.46	3843.85	3248.4	4106.25	0.224139	0.002382	0.217757	0.234449	0.217757	0.089412	805
BA_PE_DCLC_Large_Number	BA_PE_DCLC_Large_Number	417	97.4389	44.9125	72.7692	141.923	124.692	114.833	125.846	101.154	60.6154	102.462	43.5556	86.5385	24	41.1818	50.8462	95.5833	30.2308	39.8462	21.8462	60.6923	29.1538	45.8	39.0769	60.6923	0.000549	0.000731	0.000129	0.019604	0.000129	1.11738	282
BA_PE_DCLC_Large_Probability	BA_PE_DCLC_Large_Probability	418	0.6612	0.47195	0.577886	0.877318	0.621073	0.701629	0.62229	0.747584	0.670068	0.626529	0.519205	0.648415	0.239816	0.522491	0.479333	0.7591	0.296157	0.60514	0.393897	0.570499	0.38713	0.510022	0.477444	0.422377	0.001084	0.000212	0.001802	0.022227	0.001802	0.486451	277
BA_PE_DCLC_Large_PerCumIntake	BA_PE_DCLC_Large_PerCumIntake	419	97.269	95.1256	95.7007	99.6008	97.5406	96.1625	97.1119	98.9935	99.1155	94.3506	98.1924	95.9215	88.7815	89.064	97.1424	99.1852	96.7787	98.0596	94.0885	97.6503	89.7324	98.0574	97.3024	95.6653	0.124267	0.001722	0.116176	0.176781	0.116176	0.032146	66
BA_PE_DCLC_Large_Dur_ms	BA_PE_DCLC_Large_Dur_ms	420	66628.7	119436	70128	58909.1	62664.6	45849.4	54146.1	72986.5	93426	89044.2	61283	57849.6	173038	109241	79903.3	82401.3	129784	84758.8	130986	58047	276110	116258	85701.8	107004	0.001672	0.000227	0.011244	0.048425	0.011244	-0.842025	132
BA_PE_DCLC_Large_Size_mg	BA_PE_DCLC_Large_Size_mg	421	47.8664	99.169	54.0213	27.424	33.7571	42.2892	30.1546	40.6513	75.9718	36.5502	89.9262	47.9181	131.18	92.9962	93.7622	42.718	135.687	104.685	183.87	69.5557	100.86	83.9269	83.1284	67.6569	0.000549	0.000215	0.000898	0.019512	0.000898	-1.05088	693
BA_PE_DCLC_Large_MeanIntensity_mgs	BA_PE_DCLC_Large_MeanIntensity_mgs	422	0.748755	0.95867	0.765574	0.47731	0.562476	0.972157	0.578565	0.568656	0.833515	0.422887	1.45798	0.848425	0.764603	0.88215	1.277	0.537448	1.06986	1.47564	1.3936	1.30235	0.393345	0.726617	1.02086	0.660564	0.099258	0.001576	0.15686	0.204592	0.15686	-0.356542	682
BA_PE_DCLC_Large_RatioIntensity_mgs	BA_PE_DCLC_Large_RatioIntensity_mgs	423	0.733014	0.906107	0.770325	0.46553	0.538695	0.92235	0.556911	0.55697	0.813176	0.410473	1.46739	0.828322	0.7581	0.85129	1.17345	0.518413	1.04549	1.2351	1.40374	1.19826	0.36529	0.721899	0.969973	0.632286	0.11126	0.001631	0.213564	0.233794	0.213564	-0.30584	704
BA_PE_DCLC_Large_Rate_onperms	BA_PE_DCLC_Large_Rate_onperms	424	1e-06	1e-06	1e-06	2e-06	2e-06	1e-06	2e-06	1e-06	1e-06	1e-06	1e-06	1e-06	0	0	1e-06	1e-06	0	0	0	1e-06	0	1e-06	0	1e-06	0.000549	0.000203	0.000151	0.008625	0.000151	1.11072	705
BA_PE_DCLC_Large_Rate_onperactms	BA_PE_DCLC_Large_Rate_onperactms	425	3e-06	2e-06	2e-06	5e-06	4e-06	3e-06	4e-06	4e-06	2e-06	3e-06	2e-06	3e-06	1e-06	2e-06	2e-06	4e-06	1e-06	1e-06	1e-06	3e-06	1e-06	2e-06	1e-06	2e-06	0.001084	0.000206	0.000407	0.013264	0.000407	0.92677	683
BA_PE_DCLC_Large_ActProb	BA_PE_DCLC_Large_ActProb	426	3e-06	2e-06	2e-06	5e-06	4e-06	3e-06	4e-06	4e-06	2e-06	3e-06	2e-06	3e-06	1e-06	2e-06	2e-06	4e-06	1e-06	1e-06	1e-06	3e-06	1e-06	2e-06	1e-06	2e-06	0.001084	0.0002	0.000407	0.012379	0.000407	0.92677	694
BA_PE_DCLC_Small_MeanTotalBoutDur_ms	BA_PE_DCLC_Small_MeanTotalBoutDur_ms	427	310566	368776	301622	62862.4	435266	283513	498968	90932.5	53602.7	807341	122911	448638	674208	836233	181359	99609.7	185385	90192.8	263876	80998.5	1.36037e+06	142374	128492	382214	0.460606	0.003779	0.689245	0.43339	0.689245	-0.247845	695
BA_PE_DCLC_Small_MeanTotalBoutIntake_mg	BA_PE_DCLC_Small_MeanTotalBoutIntake_mg	428	116.054	191.968	176.602	15.6007	106.132	193.793	112.857	41.808	41.094	224.238	72.1031	176.319	397.826	470.247	140.245	33.5412	136.532	82.542	252.373	101.579	336.46	76.1501	90.0596	186.057	0.138302	0.001808	0.14092	0.193766	0.14092	-0.726061	684
BA_PE_DCLC_Small_BoutRate_onperms	BA_PE_DCLC_Small_BoutRate_onperms	429	1e-06	1e-06	1e-06	0	1e-06	1e-06	1e-06	0	0	1e-06	0	1e-06	1e-06	0	1e-06	0	1e-06	0	0	1e-06	1e-06	1e-06	1e-06	1e-06	0.447541	0.003736	0.908145	0.495897	0.908145	-0.027595	706
BA_PE_DCLC_Small_BoutRate_onperactms	BA_PE_DCLC_Small_BoutRate_onperactms	430	2e-06	2e-06	2e-06	1e-06	3e-06	1e-06	2e-06	1e-06	1e-06	2e-06	2e-06	2e-06	3e-06	2e-06	2e-06	1e-06	2e-06	1e-06	2e-06	2e-06	2e-06	2e-06	2e-06	3e-06	0.224139	0.002378	0.397802	0.312023	0.397802	-0.17914	715
BA_PE_DCLC_Small_BoutNumber	BA_PE_DCLC_Small_BoutNumber	431	48.6628	49.3629	53.1538	19.8462	76.0769	48.8333	76.3846	34.1538	29.8462	61.0769	40.3333	46.9231	76.0769	37.6364	55.2308	30.3333	71.8462	26	33.6154	45.6923	46.1538	44	42.7692	83	0.447541	0.003731	0.930915	0.498784	0.930915	-0.020606	726
BA_PE_DCLC_Small_BoutProbability	BA_PE_DCLC_Small_BoutProbability	432	0.3388	0.52805	0.422114	0.122682	0.378927	0.298371	0.37771	0.252416	0.329932	0.373471	0.480795	0.351585	0.760184	0.477509	0.520667	0.2409	0.703843	0.39486	0.606103	0.429501	0.61287	0.489978	0.522556	0.577623	0.001084	0.000195	0.001802	0.024188	0.001802	-0.640238	147
BA_PE_DCLC_Small_BoutPerCumIntake	BA_PE_DCLC_Small_BoutPerCumIntake	433	2.731	4.87435	4.29929	0.39923	2.45939	3.83747	2.88806	1.00649	0.884474	5.6494	1.8076	4.07854	11.2185	10.936	2.85765	0.814766	3.22126	1.94041	5.91145	2.34968	10.2676	1.9426	2.69764	4.33466	0.124267	0.001719	0.116176	0.176194	0.116176	-0.835783	409
BA_PE_DCLC_Small_BoutMeanDur_ms	BA_PE_DCLC_Small_BoutMeanDur_ms	434	5718.68	7803.32	5674.51	3167.48	5721.39	5805.73	6532.31	2662.44	1795.97	13218.4	3047.37	9561.14	8862.19	22218.7	3283.65	3283.84	2580.31	3468.96	7849.84	1772.69	29474.6	3235.78	3004.3	4604.99	0.48685	0.003856	0.491663	0.357967	0.491663	-0.448407	780
BA_PE_DCLC_Small_BoutMeanSize_mg	BA_PE_DCLC_Small_BoutMeanSize_mg	435	2.27672	4.12855	3.32246	0.786081	1.39506	3.96845	1.47748	1.22411	1.37686	3.67139	1.78768	3.75761	5.22926	12.4945	2.53925	1.10575	1.90034	3.17469	7.50768	2.2231	7.28998	1.73068	2.10571	2.24165	0.078144	0.00149	0.119082	0.17765	0.119082	-0.858679	615
BA_PE_DCLC_Small_BoutMeanIntensity_mgs	BA_PE_DCLC_Small_BoutMeanIntensity_mgs	436	0.924995	1.19046	0.780787	0.547056	0.618561	1.17521	0.722973	0.92819	1.62913	0.370124	1.59033	0.887576	0.852248	0.746836	1.40554	0.706909	0.962949	2.30018	1.35954	2.1834	0.368386	0.956032	1.68953	0.753993	0.153381	0.001936	0.257875	0.253707	0.257875	-0.364005	76
BA_PE_DCLC_Small_BoutRatioIntensity_mgs	BA_PE_DCLC_Small_BoutRatioIntensity_mgs	437	0.447103	0.674537	0.585507	0.248172	0.243833	0.68354	0.22618	0.45977	0.766641	0.277748	0.58663	0.393008	0.590065	0.56234	0.7733	0.336726	0.736477	0.915173	0.956411	1.25408	0.247331	0.534858	0.700898	0.486787	0.025877	0.000742	0.043655	0.098171	0.043655	-0.593291	10
BA_PE_DCLC_Small_BoutSlopeIntensity_mgs	BA_PE_DCLC_Small_BoutSlopeIntensity_mgs	438	0.240703	0.415629	0.594733	0.185029	0.112542	0.415063	0.099226	0.153705	0.145232	0.234544	0.183527	0.283431	0.588608	0.441708	0.318229	0.135358	0.691126	0.333317	0.997505	0.458536	0.185025	0.282769	0.236937	0.318436	0.018899	0.000596	0.064374	0.128889	0.064374	-0.788043	413
BA_PE_DCLC_Small_BoutMeanSize_evtnum	BA_PE_DCLC_Small_BoutMeanSize_evtnum	439	5.01895	4.04031	3.09841	2.13566	4.61072	6.32765	5.33333	2.90315	1.93041	15.6574	2.04683	6.1459	7.33772	8.02899	2.07242	2.61538	2.606	2.04438	3.07094	1.80471	10.9233	2.37954	2.46223	3.13809	0.287578	0.002793	0.524817	0.372597	0.524817	0.312919	781
BA_PE_DCLC_Small_BoutMeanSize_evtdur	BA_PE_DCLC_Small_BoutMeanSize_evtdur	440	2204.29	3727.06	3723.22	1137.97	1357.95	2390.1	1501.73	1089.19	773.536	6433.77	850.35	2785.11	4219.55	11481.9	1769.43	1297.41	1556.68	1445.67	4113.8	858.554	13308.2	1444.76	876.103	2352.73	0.186689	0.002156	0.300031	0.262888	0.300031	-0.757724	619
BA_PE_DCLC_Small_DC_MeanTotalBoutDur_ms	BA_PE_DCLC_Small_DC_MeanTotalBoutDur_ms	441	280457	339073	129325	49174.6	411791	277718	458092	86089.3	36935.7	802276	121920	431246	658601	830734	167350	88458	178347	87058.2	155952	74298.1	1.28154e+06	114702	109674	322160	0.408742	0.00355	0.681641	0.430388	0.681641	-0.273816	88
BA_PE_DCLC_Small_DC_MeanTotalBoutIntake_mg	BA_PE_DCLC_Small_DC_MeanTotalBoutIntake_mg	442	101.026	173.35	62.5621	11.2677	103.259	191.339	99.1209	40.6571	36.7425	222.555	71.2273	171.532	389.939	468.552	129.774	31.5784	130.424	77.3103	133.094	96.0515	316.891	64.5033	83.434	158.648	0.124267	0.001715	0.155252	0.205428	0.155252	-0.778958	22
BA_PE_DCLC_Small_DC_BoutRate_onperms	BA_PE_DCLC_Small_DC_BoutRate_onperms	443	1e-06	1e-06	1e-06	0	2e-06	1e-06	2e-06	1e-06	1e-06	1e-06	1e-06	1e-06	2e-06	1e-06	1e-06	1e-06	2e-06	1e-06	1e-06	1e-06	1e-06	1e-06	1e-06	2e-06	0.460606	0.003774	0.963249	0.508941	0.963249	-0.011089	163
BA_PE_DCLC_Small_DC_BoutRate_onperactms	BA_PE_DCLC_Small_DC_BoutRate_onperactms	444	2e-06	2e-06	2e-06	1e-06	3e-06	2e-06	3e-06	1e-06	1e-06	2e-06	2e-06	2e-06	3e-06	2e-06	2e-06	1e-06	2e-06	1e-06	2e-06	2e-06	2e-06	2e-06	2e-06	3e-06	0.224139	0.002375	0.399602	0.311828	0.399602	-0.170798	195
BA_PE_DCLC_Small_DC_BoutNumber	BA_PE_DCLC_Small_DC_BoutNumber	445	46.9889	47.3531	47.7692	19.0769	75.4615	48	72.0769	33.5385	27.6923	60.4615	39.8889	45.9231	75	36.4545	51.2308	30.1667	69.2308	24.2308	30.1538	45.3077	43.6923	42	41.7692	79	0.460606	0.003769	0.963091	0.509447	0.963091	-0.011138	12
BA_PE_DCLC_Small_DC_BoutProbability	BA_PE_DCLC_Small_DC_BoutProbability	446	0.346652	0.554789	0.416499	0.124811	0.384706	0.308351	0.377366	0.263444	0.35225	0.376798	0.500697	0.361599	0.778754	0.526938	0.551325	0.249483	0.740132	0.439331	0.647934	0.441199	0.646925	0.495868	0.546278	0.593299	0.000868	0.000199	0.000969	0.019236	0.000969	-0.678449	78
BA_PE_DCLC_Small_DC_BoutPerCumIntake	BA_PE_DCLC_Small_DC_BoutPerCumIntake	447	2.75406	5.56072	2.03632	0.350043	2.67017	4.4558	2.85585	1.19994	1.04337	6.00296	2.29354	4.63257	12.8451	12.0645	3.69548	0.860786	3.47002	2.80821	4.5386	2.71923	13.7118	1.86698	3.55679	4.59113	0.068957	0.001416	0.081796	0.14936	0.081796	-1.01371	90
BA_PE_DCLC_Small_DC_BoutMeanDur_ms	BA_PE_DCLC_Small_DC_BoutMeanDur_ms	448	5250.03	7459.57	2707.29	2577.7	5456.97	5785.79	6355.6	2566.88	1333.79	13269.2	3056.48	9390.62	8781.34	22788.2	3266.6	2932.31	2576.12	3592.88	5171.89	1639.86	29331	2731	2625.7	4077.98	0.460606	0.003765	0.476618	0.349802	0.476618	-0.506766	24
BA_PE_DCLC_Small_DC_BoutMeanSize_mg	BA_PE_DCLC_Small_DC_BoutMeanSize_mg	449	2.0371	3.83623	1.30967	0.590647	1.36836	3.98622	1.37521	1.21225	1.32681	3.68093	1.78564	3.73521	5.19919	12.853	2.53313	1.0468	1.88391	3.19058	4.41384	2.11998	7.25279	1.53579	1.9975	2.0082	0.030106	0.000795	0.125328	0.182205	0.125328	-0.913174	737
BA_PE_DCLC_Small_DC_BoutMeanIntensity_mgs	BA_PE_DCLC_Small_DC_BoutMeanIntensity_mgs	450	0.934192	1.18133	0.782897	0.556577	0.621599	1.17824	0.719352	0.935171	1.68787	0.369992	1.59486	0.895362	0.855335	0.741846	1.42278	0.709877	0.960951	2.12398	1.37368	2.18396	0.368225	0.966374	1.70837	0.760541	0.153381	0.001933	0.280477	0.252044	0.280477	-0.338617	733
BA_PE_DCLC_Small_DC_BoutRatioIntensity_mgs	BA_PE_DCLC_Small_DC_BoutRatioIntensity_mgs	451	0.459541	0.67641	0.483758	0.229137	0.250755	0.688968	0.216378	0.472266	0.99477	0.277404	0.584216	0.397759	0.592072	0.564021	0.775465	0.356987	0.731296	0.88803	0.853429	1.29279	0.247274	0.562356	0.760749	0.49245	0.025877	0.000739	0.06787	0.132973	0.06787	-0.557703	821
BA_PE_DCLC_Small_DC_BoutSlopeIntensity_mgs	BA_PE_DCLC_Small_DC_BoutSlopeIntensity_mgs	452	0.213644	0.355577	0.273189	0.087269	0.119118	0.417244	0.094373	0.155935	0.28367	0.233837	0.182919	0.288888	0.589718	0.438672	0.307488	0.092357	0.690805	0.329496	0.580121	0.299254	0.181469	0.242126	0.251079	0.264339	0.025877	0.000736	0.041251	0.093222	0.041251	-0.734952	771
BA_PE_DCLC_Small_DC_BoutMeanSize_evtnum	BA_PE_DCLC_Small_DC_BoutMeanSize_evtnum	453	4.94514	3.95747	2.54106	2.02016	4.53211	6.38889	5.31163	2.8922	1.86111	15.7837	2.03343	6.0871	7.3282	8.21945	2.07357	2.46133	2.62778	2.09524	2.5051	1.78778	10.7764	2.28333	2.34991	2.9815	0.35843	0.003258	0.52794	0.374232	0.52794	0.321435	749
BA_PE_DCLC_Small_DC_BoutMeanSize_evtdur	BA_PE_DCLC_Small_DC_BoutMeanSize_evtdur	454	1920.39	3550.1	1402.96	796.915	1318.85	2401.83	1426.56	1073.98	708.675	6443.99	849.114	2781.05	4197.86	11812	1756.08	1194.84	1542.64	1456.81	2392.6	817.667	13228.1	1280.82	833.28	2088.42	0.153381	0.001929	0.274892	0.24948	0.274892	-0.886458	760
BA_PE_DCLC_Small_LC_MeanTotalBoutDur_ms	BA_PE_DCLC_Small_LC_MeanTotalBoutDur_ms	455	30108.8	29702.9	172297	13687.8	23474.6	5795.17	40875.5	4843.23	16667	5065	991.111	17391.8	15607.2	5498.73	14008.2	11151.7	7038.15	3134.69	107923	6700.38	78828.2	27672.6	18818.2	60054.1	0.310464	0.002918	0.982493	0.515529	0.982493	0.019578	761
BA_PE_DCLC_Small_LC_MeanTotalBoutIntake_mg	BA_PE_DCLC_Small_LC_MeanTotalBoutIntake_mg	456	15.0283	18.6177	114.04	4.33295	2.87323	2.45379	13.7358	1.15096	4.3515	1.68259	0.875826	4.78635	7.88734	1.69558	10.4703	1.96281	6.10748	5.23177	119.279	5.52712	19.5692	11.6468	6.62562	27.4092	0.025877	0.000733	0.805904	0.468658	0.805904	-0.308998	750
BA_PE_DCLC_Small_LC_BoutRate_onperms	BA_PE_DCLC_Small_LC_BoutRate_onperms	457	0	0	0	0	0	0	0	0	0	0	0	0	0	0	0	0	0	0	0	0	0	0	0	0	0.177963	0.002074	0.609082	0.405317	0.609082	-0.26977	772
BA_PE_DCLC_Small_LC_BoutRate_onperactms	BA_PE_DCLC_Small_LC_BoutRate_onperactms	458	0	1e-06	1e-06	0	0	0	1e-06	0	0	0	0	0	1e-06	1e-06	1e-06	0	1e-06	0	2e-06	0	1e-06	1e-06	0	1e-06	0.078144	0.001485	0.170195	0.213445	0.170195	-0.658743	801
BA_PE_DCLC_Small_LC_BoutNumber	BA_PE_DCLC_Small_LC_BoutNumber	459	1.67393	2.00981	5.38462	0.769231	0.615385	0.833333	4.30769	0.615385	2.15385	0.615385	0.444444	1	1.07692	1.18182	4	0.166667	2.61538	1.76923	3.46154	0.384615	2.46154	2	1	4	0.177951	0.002077	0.614682	0.408448	0.614682	-0.263818	790
BA_PE_DCLC_Small_LC_BoutProbability	BA_PE_DCLC_Small_LC_BoutProbability	460	0.190549	0.24866	0.479452	0.086207	0.133333	0.104167	0.383562	0.076923	0.181818	0.2	0.105263	0.154762	0.285714	0.122642	0.304094	0.033333	0.306306	0.165468	0.387931	0.104167	0.316832	0.392157	0.185714	0.379562	0.131152	0.001774	0.30153	0.263695	0.30153	-0.384014	812
BA_PE_DCLC_Small_LC_BoutPerCumIntake	BA_PE_DCLC_Small_LC_BoutPerCumIntake	461	1.78036	1.9048	11.0142	0.62912	0.640979	0.324641	3.14401	0.150337	0.386922	0.642671	0.099151	0.771579	1.54518	0.407321	0.750031	0.438012	1.27278	0.348591	8.92318	0.698958	2.02612	2.50445	0.66744	3.27553	0.078144	0.001481	0.92036	0.497214	0.92036	-0.097468	776
BA_PE_DCLC_Small_LC_BoutMeanDur_ms	BA_PE_DCLC_Small_LC_BoutMeanDur_ms	462	14784.2	18525.9	31997.9	17794.1	38146.2	6954.2	9488.96	7870.25	7738.25	8230.62	2230	17391.8	14492.4	4652.77	3502.06	66910	2691.06	1771.78	31177.8	17421	32024	13836.3	18818.2	15013.5	0.434533	0.003664	0.583986	0.393202	0.583986	-0.325485	741
BA_PE_DCLC_Small_LC_BoutMeanSize_mg	BA_PE_DCLC_Small_LC_BoutMeanSize_mg	463	5.09956	8.71048	21.1788	5.63283	4.66899	2.94455	3.18866	1.87031	2.02034	2.73421	1.97061	4.78635	7.32396	1.43472	2.61759	11.7769	2.33521	2.95709	34.4584	14.3705	7.94998	5.82341	6.62562	6.85229	0.060625	0.001331	0.287167	0.254548	0.287167	-0.772378	774
BA_PE_DCLC_Small_LC_BoutMeanIntensity_mgs	BA_PE_DCLC_Small_LC_BoutMeanIntensity_mgs	464	0.662219	1.21771	0.762075	0.310929	0.245975	1.00078	0.783563	0.54773	0.873945	0.383106	1.18408	0.530007	0.637293	0.900758	1.18468	0.169592	1.01584	4.71341	1.23642	2.11733	0.37123	0.738859	0.902485	0.624657	0.078144	0.001477	0.173099	0.213568	0.173099	-0.878794	752
BA_PE_DCLC_Small_LC_BoutRatioIntensity_mgs	BA_PE_DCLC_Small_LC_BoutRatioIntensity_mgs	465	0.385011	0.64014	0.66188	0.316556	0.122397	0.423421	0.336039	0.237642	0.261085	0.3322	0.883681	0.275208	0.505364	0.308359	0.747443	0.176011	0.867767	1.66899	1.10522	0.824897	0.248251	0.420879	0.352085	0.456408	0.060625	0.001327	0.106749	0.169795	0.106749	-0.733488	55
BA_PE_DCLC_Small_LC_BoutSlopeIntensity_mgs	BA_PE_DCLC_Small_LC_BoutSlopeIntensity_mgs	466	0.302276	0.469452	0.607429	0.26841	0.082772	0.347506	0.118273	0.138369	0.073058	0.361949	0.844491	0.180507	0.504146	0.105375	0.445904	0.217069	0.705389	0.877542	1.13587	0.517126	0.244464	0.294883	0.212876	0.372775	0.060625	0.001323	0.181782	0.217235	0.181782	-0.635108	121
BA_PE_DCLC_Small_LC_BoutMeanSize_evtnum	BA_PE_DCLC_Small_LC_BoutMeanSize_evtnum	467	5.74569	7.43372	8.04286	5	14.25	2.8	5.69643	3.5	2.82143	3.25	3.25	8.84615	8	2.15385	2.05769	30.5	2.02941	1.34783	8	3.8	13.5312	4.4	7.15385	6.23077	0.434531	0.003697	0.549661	0.381339	0.549661	-0.371605	131
BA_PE_DCLC_Small_LC_BoutMeanSize_evtdur	BA_PE_DCLC_Small_LC_BoutMeanSize_evtdur	468	5741.84	7224.21	24307.2	9596.1	6153	1714.4	2759.46	1918.38	1607.46	5429.5	961.25	2971.62	5729.79	1299	1940.52	19863.5	1928.38	1293.13	19107.4	5675	14728.5	4887.55	2664.77	7573.02	0.287578	0.002789	0.623036	0.409823	0.623036	-0.331327	65
BA_PE_DCLC_Small_TotalDur_ms	BA_PE_DCLC_Small_TotalDur_ms	469	310566	368776	301622	62862.4	435266	283513	498968	90932.5	53602.7	807341	122911	448638	674208	836233	181359	99609.7	185385	90192.8	263876	80998.5	1.36037e+06	142374	128492	382214	0.460606	0.00376	0.689245	0.432794	0.689245	-0.247845	561
BA_PE_DCLC_Small_TotalIntake_mg	BA_PE_DCLC_Small_TotalIntake_mg	470	116.054	191.968	176.602	15.6007	106.132	193.793	112.857	41.808	41.094	224.238	72.1031	176.319	397.826	470.247	140.245	33.5412	136.532	82.542	252.373	101.579	336.46	76.1501	90.0596	186.057	0.138302	0.001804	0.14092	0.193184	0.14092	-0.726061	603
BA_PE_DCLC_Small_Number	BA_PE_DCLC_Small_Number	471	48.6628	49.3629	53.1538	19.8462	76.0769	48.8333	76.3846	34.1538	29.8462	61.0769	40.3333	46.9231	76.0769	37.6364	55.2308	30.3333	71.8462	26	33.6154	45.6923	46.1538	44	42.7692	83	0.447541	0.003727	0.930915	0.4982	0.930915	-0.020606	481
BA_PE_DCLC_Small_Probability	BA_PE_DCLC_Small_Probability	472	0.3388	0.52805	0.422114	0.122682	0.378927	0.298371	0.37771	0.252416	0.329932	0.373471	0.480795	0.351585	0.760184	0.477509	0.520667	0.2409	0.703843	0.39486	0.606103	0.429501	0.61287	0.489978	0.522556	0.577623	0.001084	0.00019	0.001802	0.023497	0.001802	-0.640238	488
BA_PE_DCLC_Small_PerCumIntake	BA_PE_DCLC_Small_PerCumIntake	473	2.731	4.87435	4.29929	0.39923	2.45939	3.83747	2.88806	1.00649	0.884474	5.6494	1.8076	4.07854	11.2185	10.936	2.85765	0.814766	3.22126	1.94041	5.91145	2.34968	10.2676	1.9426	2.69764	4.33466	0.124267	0.001712	0.116176	0.175611	0.116176	-0.835783	319
BA_PE_DCLC_Small_Dur_ms	BA_PE_DCLC_Small_Dur_ms	474	5718.68	7803.32	5674.51	3167.48	5721.39	5805.73	6532.31	2662.44	1795.97	13218.4	3047.37	9561.14	8862.19	22218.7	3283.65	3283.84	2580.31	3468.96	7849.84	1772.69	29474.6	3235.78	3004.3	4604.99	0.48685	0.003852	0.491663	0.357397	0.491663	-0.448407	87
BA_PE_DCLC_Small_Size_mg	BA_PE_DCLC_Small_Size_mg	475	2.27672	4.12855	3.32246	0.786081	1.39506	3.96845	1.47748	1.22411	1.37686	3.67139	1.78768	3.75761	5.22926	12.4945	2.53925	1.10575	1.90034	3.17469	7.50768	2.2231	7.28998	1.73068	2.10571	2.24165	0.078144	0.001473	0.119082	0.177071	0.119082	-0.858679	21
BA_PE_DCLC_Small_MeanIntensity_mgs	BA_PE_DCLC_Small_MeanIntensity_mgs	476	0.924995	1.19046	0.780787	0.547056	0.618561	1.17521	0.722973	0.92819	1.62913	0.370124	1.59033	0.887576	0.852248	0.746836	1.40554	0.706909	0.962949	2.30018	1.35954	2.1834	0.368386	0.956032	1.68953	0.753993	0.153381	0.001925	0.257875	0.253162	0.257875	-0.364005	498
BA_PE_DCLC_Small_RatioIntensity_mgs	BA_PE_DCLC_Small_RatioIntensity_mgs	477	0.447103	0.674537	0.585507	0.248172	0.243833	0.68354	0.22618	0.45977	0.766641	0.277748	0.58663	0.393008	0.590065	0.56234	0.7733	0.336726	0.736477	0.915173	0.956411	1.25408	0.247331	0.534858	0.700898	0.486787	0.025877	0.00073	0.043655	0.09769	0.043655	-0.593291	575
BA_PE_DCLC_Small_Rate_onperms	BA_PE_DCLC_Small_Rate_onperms	478	1e-06	1e-06	1e-06	0	1e-06	1e-06	1e-06	0	0	1e-06	0	1e-06	1e-06	0	1e-06	0	1e-06	0	0	1e-06	1e-06	1e-06	1e-06	1e-06	0.447541	0.003722	0.908145	0.495305	0.908145	-0.027595	99
BA_PE_DCLC_Small_Rate_onperactms	BA_PE_DCLC_Small_Rate_onperactms	479	2e-06	2e-06	2e-06	1e-06	3e-06	1e-06	2e-06	1e-06	1e-06	2e-06	2e-06	2e-06	3e-06	2e-06	2e-06	1e-06	2e-06	1e-06	2e-06	2e-06	2e-06	2e-06	2e-06	3e-06	0.224139	0.002371	0.397802	0.311488	0.397802	-0.17914	33
BA_PE_DCLC_Small_ActProb	BA_PE_DCLC_Small_ActProb	480	2e-06	2e-06	2e-06	1e-06	3e-06	1e-06	2e-06	1e-06	1e-06	2e-06	2e-06	2e-06	3e-06	2e-06	2e-06	1e-06	2e-06	1e-06	2e-06	2e-06	2e-06	2e-06	2e-06	3e-06	0.224139	0.002367	0.397802	0.310954	0.397802	-0.17914	161
BA_LE_APIP_Large_MeanTotalBoutDur_ms	BA_LE_APIP_Large_MeanTotalBoutDur_ms	481	343966	313492	391134	357862	321102	382598	285669	357242	309050	319306	304659	411039	388767	278232	472061	186148	222595	261614	213180	282641	529528	245777	281670	399694	0.068957	0.001412	0.414397	0.320089	0.414397	0.133836	157
BA_LE_APIP_Large_MeanTotalBoutIntake_mg	BA_LE_APIP_Large_MeanTotalBoutIntake_mg	482	4462.58	3935.52	4517.66	4357.43	4618.02	5287.27	4184.99	4174	4418.79	4616.01	4005.34	4446.25	3731.69	4232.32	5471.72	3974.78	3665.38	3893.89	3432.29	4381.49	3242.67	3905.1	3238.29	4056.58	0.003106	0.000268	0.024406	0.067117	0.024406	0.181324	688
BA_LE_APIP_Large_BoutNumber	BA_LE_APIP_Large_BoutNumber	483	63.7026	44.6838	63.6154	45.6154	74.3077	73.3333	74.3846	46.9231	74.3846	88.7692	44	51.6923	40.2308	51.1818	48.6154	29.9167	34.1538	52.6154	24.6154	46.6154	35.3846	77.8	40.5385	54.5385	0.011456	0.000544	0.007031	0.042235	0.007031	0.511598	686
BA_LE_APIP_Large_BoutProbability	BA_LE_APIP_Large_BoutProbability	484	0.722369	0.774256	0.729921	0.71532	0.66805	0.570687	0.575253	0.800525	0.907129	0.800277	0.714801	0.741722	0.887946	0.781944	0.761446	0.713718	0.8117	0.8758	0.816327	0.590068	0.725552	0.89118	0.851373	0.58402	0.099258	0.001572	0.258208	0.252404	0.258208	-0.100076	675
BA_LE_APIP_Large_BoutPerCumIntake	BA_LE_APIP_Large_BoutPerCumIntake	485	95.4784	96.9599	96.7538	97.6666	94.2453	90.639	89.4817	96.3802	99.3846	97.7331	96.6436	95.8561	99.6138	97.8058	97.7094	94.8258	98.654	98.8682	98.2813	93.5294	95.1573	98.8632	99.2873	90.9234	0.078144	0.001469	0.251353	0.250531	0.251353	-0.022214	677
BA_LE_APIP_Large_BoutMeanDur_ms	BA_LE_APIP_Large_BoutMeanDur_ms	486	5761.34	7470.51	6148.41	7845.21	4321.24	5217.24	3840.43	7613.35	4154.75	3597.03	6924.08	7951.66	9663.42	5436.14	9710.12	6222.23	6517.43	4972.2	8660.43	6063.26	14964.9	3159.08	6948.23	7328.67	0.099258	0.001569	0.131004	0.185725	0.131004	-0.374802	30
BA_LE_APIP_Large_BoutMeanSize_mg	BA_LE_APIP_Large_BoutMeanSize_mg	487	15.9941	15.779	15.6934	14.9734	17.6042	16.9113	16.8939	14.2521	17.3199	17.8507	15.3554	13.0866	13.372	16.8013	12.3954	22.7496	17.5725	20.2547	16.7591	17.5469	7.18745	18.6618	14.4249	11.6223	0.48685	0.003847	0.88057	0.489029	0.88057	0.019533	96
BA_LE_APIP_Large_BoutMeanIntensity_mgs	BA_LE_APIP_Large_BoutMeanIntensity_mgs	488	343966	313492	391134	357862	321102	382598	285669	357242	309050	319306	304659	411039	388767	278232	472061	186148	222595	261614	213180	282641	529528	245777	281670	399694	0.068957	0.001407	0.414397	0.319549	0.414397	0.133836	84
BA_LE_APIP_Large_BoutRatioIntensity_mgs	BA_LE_APIP_Large_BoutRatioIntensity_mgs	489	63.7026	44.6838	63.6154	45.6154	74.3077	73.3333	74.3846	46.9231	74.3846	88.7692	44	51.6923	40.2308	51.1818	48.6154	29.9167	34.1538	52.6154	24.6154	46.6154	35.3846	77.8	40.5385	54.5385	0.011456	0.000541	0.007031	0.041687	0.007031	0.511598	18
BA_LE_APIP_Large_BoutSlopeIntensity_mgs	BA_LE_APIP_Large_BoutSlopeIntensity_mgs	490	0.722369	0.774256	0.729921	0.71532	0.66805	0.570687	0.575253	0.800525	0.907129	0.800277	0.714801	0.741722	0.887946	0.781944	0.761446	0.713718	0.8117	0.8758	0.816327	0.590068	0.725552	0.89118	0.851373	0.58402	0.099258	0.001565	0.258208	0.251864	0.258208	-0.100076	52
BA_LE_APIP_Large_AP_MeanTotalBoutDur_ms	BA_LE_APIP_Large_AP_MeanTotalBoutDur_ms	491	95.4784	96.9599	96.7538	97.6666	94.2453	90.639	89.4817	96.3802	99.3846	97.7331	96.6436	95.8561	99.6138	97.8058	97.7094	94.8258	98.654	98.8682	98.2813	93.5294	95.1573	98.8632	99.2873	90.9234	0.078144	0.001465	0.251353	0.249985	0.251353	-0.022214	118
BA_LE_APIP_Large_AP_MeanTotalBoutIntake_mg	BA_LE_APIP_Large_AP_MeanTotalBoutIntake_mg	492	5761.34	7470.51	6148.41	7845.21	4321.24	5217.24	3840.43	7613.35	4154.75	3597.03	6924.08	7951.66	9663.42	5436.14	9710.12	6222.23	6517.43	4972.2	8660.43	6063.26	14964.9	3159.08	6948.23	7328.67	0.099258	0.001561	0.131004	0.18515	0.131004	-0.374802	128
BA_LE_APIP_Large_AP_BoutNumber	BA_LE_APIP_Large_AP_BoutNumber	493	5726.35	6015.63	7284.89	8796.09	4053.19	4951.87	3382.85	6901.92	4162.77	4634.53	6396.44	6698.98	9766.73	4524.14	6983.07	3387.41	3717.24	5574.77	4809.95	5035.53	11450.3	2959.64	7641.33	6337.42	0.48685	0.003842	0.766579	0.454474	0.766579	-0.071098	62
BA_LE_APIP_Large_AP_BoutProbability	BA_LE_APIP_Large_AP_BoutProbability	494	73.4452	94.3095	71.0152	95.5255	62.1472	72.0992	56.2615	88.9542	59.4046	52.0001	91.0305	86.0137	92.7571	82.6919	112.551	132.862	107.32	74.0066	139.437	93.9924	91.6407	50.1941	79.882	74.3802	0.022157	0.000658	0.036177	0.08426	0.036177	-0.360736	700
BA_LE_APIP_Large_AP_BoutPerCumIntake	BA_LE_APIP_Large_AP_BoutPerCumIntake	495	48.7484	58.6852	49.0738	93.4899	38.2226	44.7022	28.7388	46.4929	44.5689	40.1931	54.583	47.419	72.1309	55.752	74.4692	68.1666	58.8372	56.9227	75.8832	60.5352	43.8683	29.031	55.5198	53.1063	0.016057	0.000548	0.142922	0.194759	0.142922	-0.267641	503
BA_LE_APIP_Large_AP_BoutMeanDur_ms	BA_LE_APIP_Large_AP_BoutMeanDur_ms	496	15.9941	15.779	15.6934	14.9734	17.6042	16.9113	16.8939	14.2521	17.3199	17.8507	15.3554	13.0866	13.372	16.8013	12.3954	22.7496	17.5725	20.2547	16.7591	17.5469	7.18745	18.6618	14.4249	11.6223	0.48685	0.003838	0.88057	0.488435	0.88057	0.019533	493
BA_LE_APIP_Large_AP_BoutMeanSize_mg	BA_LE_APIP_Large_AP_BoutMeanSize_mg	497	13.098	13.6971	11.5502	12.1763	14.3818	13.8194	14.6498	11.684	14.298	14.4564	13.147	10.8171	9.59878	15.2115	11.5911	21.3528	16.4665	14.8841	16.1004	15.502	6.1237	15.8888	11.4967	10.1492	0.204906	0.002315	0.661404	0.423467	0.661404	-0.06453	324
BA_LE_APIP_Large_AP_BoutMeanIntensity_mgs	BA_LE_APIP_Large_AP_BoutMeanIntensity_mgs	498	290059	259958	282154	300693	291663	341874	249592	293286	243537	281843	257481	358463	362876	224917	362775	168007	205821	214670	162289	253943	374916	215880	243691	329714	0.11126	0.001627	0.274148	0.250298	0.274148	0.158064	492
BA_LE_APIP_Large_AP_BoutRatioIntensity_mgs	BA_LE_APIP_Large_AP_BoutRatioIntensity_mgs	499	59.1329	40.4064	54.7692	41.3846	71.6154	70.1667	67.4615	43.6154	65.1538	87.0769	41.7778	48.3077	38	44.4545	40.7692	28.0833	31.3846	46.8462	20.2308	44.1538	29	73.8	37.8462	50.3077	0.006705	0.000378	0.006933	0.042772	0.006933	0.549379	486
BA_LE_APIP_Large_AP_BoutSlopeIntensity_mgs	BA_LE_APIP_Large_AP_BoutSlopeIntensity_mgs	500	0.72266	0.776301	0.728016	0.706965	0.667862	0.562083	0.569851	0.799718	0.933848	0.798871	0.71619	0.743195	0.882143	0.765258	0.787519	0.709474	0.812749	0.918552	0.804281	0.589322	0.698148	0.894545	0.854167	0.59945	0.11126	0.001623	0.266164	0.245463	0.266164	-0.103299	608
BA_LE_APIP_Large_IP_MeanTotalBoutDur_ms	BA_LE_APIP_Large_IP_MeanTotalBoutDur_ms	501	95.4705	97.1688	96.8268	97.4621	94.1523	90.0033	89.0038	96.9846	99.7669	97.6669	96.4488	96.3899	99.5843	97.4742	98.271	94.8394	98.6983	99.7055	98.0124	93.5623	94.2576	99.0121	99.3396	93.269	0.088231	0.001537	0.193144	0.224925	0.193144	-0.025438	568
[truncated: 388 more rows]
