# Supplementary material for: Age-related changes in cerebellar and hypothalamic function accompany non-microglial immune gene expression, altered synapse organization, and excitatory amino acid neurotransmission deficits
Source: publisher site journal article supplement (doi:10.18632/aging.101040), 2016-09-20
Supplement: Supplementary file 2 [file aging-v8i9-101040-supplementary-material-SD4.xls]

## Sheet: B. BALB hypothalamus DEGs
BioConductor Gene Listing
DE genes for OLDvsYOUNG with B > 0
Rank	ID	Symbol	Gene	aveIntensity	OLDvsYOUNG.M	OLDvsYOUNG.AdjP	OLDvsYOUNG.FDR	OLDvsYOUNG.B	Young1001	Young1002	Young1004	Young1006	Young1007	Young1008	Young1009	Old1101	Old1102	Old1105	Old1106b	Old1106a	Old1108	Old1110	Unigene	Description	Coordinates
1	A_51_P509679	Igh-VJ558	16061	8.589	2.572	0.052	0.002	5.245	7.262	7.825	7.693	7.24	6.629	7.921	7.867	9.173	11.39	9.148	10.904	10.893	8.377	10.553	Mm.240437	Mus musculus immunoglobulin heavy chain (J558 family), mRNA (cDNA clone MGC:6727 IMAGE:3588636), complete cds. [BC004786]	chr12:110781090-110781031
2	A_52_P238027	Lyzs	17105	13.991	1.992	0.004	0	7.531	13.406	12.564	13.194	13.334	12.661	13.642	12.833	15.791	14.527	15.163	14.936	14.962	14.865	15.335	Mm.45436	Mus musculus lysozyme (Lyzs), mRNA [NM_017372]	chr10:116785338-116785279
3	A_52_P582059	Lzp-s	17110	11.013	1.984	0.002	0	8.064	10.308	9.714	10.236	10.333	9.729	10.639	9.984	13.002	11.561	12.199	11.99	11.87	11.812	12.4	Mm.177539	Mus musculus P lysozyme structural (Lzp-s), mRNA [NM_013590]	chr10:116796142-116796083
4	A_51_P110301	C3	12266	10.889	1.931	0	0	13.283	10.305	9.38	9.658	10.097	9.686	9.68	9.924	11.938	11.105	11.975	11.896	11.936	11.923	11.473	Mm.19131	Mus musculus complement component 3 (C3), mRNA [NM_009778]	chr17:55414626-55414567
5	A_51_P358765	Spp1	20750	11.057	1.727	0.008	0	6.814	9.94	9.457	10.13	11.141	10.237	10.881	10.329	12.526	12.469	11.898	12.254	12.078	11.111	11.868	Mm.288474	Mus musculus secreted phosphoprotein 1 (Spp1), mRNA [NM_009263]	chr5:103631152-103631211
6	A_51_P246653	Clec7a	56644	8.409	1.658	0.001	0	9.009	7.185	7.488	7.917	7.929	7.366	7.708	7.697	10.065	8.902	9.134	9.264	9.143	8.958	9.433	Mm.239516	Mus musculus C-type lectin domain family 7, member a (Clec7a), mRNA [NM_020008]	chr6:129485092-129485033
7	A_51_P438967	Gpnmb	93695	7.101	1.636	0.016	0.001	6.237	6.021	6.21	6.646	6.389	6.471	6.545	6.492	9.16	6.993	8.271	7.616	7.82	8.326	8.041	Mm.302602	Mus musculus glycoprotein (transmembrane) nmb (Gpnmb), mRNA [NM_053110]	chr6:49016437-49016496
8	A_51_P180159	Igh-VJ558	16061	7.551	1.621	0.727	0.011	2.945	6.852	7.259	7.005	6.45	6.542	7.011	7.12	7.791	9.406	7.499	9.391	9.319	7.428	8.752	Mm.240437	Mus musculus immunoglobulin heavy chain (J558 family), mRNA (cDNA clone MGC:6727 IMAGE:3588636), complete cds. [BC004786]	chr12:110781348-110781289
9	A_51_P187645	Igh-VJ558	16061	7.621	1.587	1	0.019	2.254	7.13	7.395	6.981	6.871	6.411	7.093	7.085	7.926	9.661	7.688	9.448	9.22	7.33	8.798	Mm.240437	Mus musculus immunoglobulin heavy chain (J558 family), mRNA (cDNA clone MGC:6727 IMAGE:3588636), complete cds. [BC004786]	chr12:110781228-110781169
10	A_51_P321150	Lyzs	17105	8.303	1.48	0.007	0	6.962	7.668	7.312	8.022	7.638	7.636	7.875	7.378	9.643	8.666	9.25	8.809	8.9	9.208	9.416	Mm.45436	Mus musculus lysozyme (Lyzs), mRNA [NM_017372]	chr10:116790063-116790004
11	A_52_P654624	4933439C20Rik	236604	11.19	1.445	1	0.098	0.136	9.976	10.093	10.563	10.057	10.409	10.085	10.558	10.831	11.298	12.471	12.464	12.399	11.326	11.068	Mm.247625	Mus musculus 10 days neonate skin cDNA, RIKEN full-length enriched library, clone:4732458O15 product:Similar to phosphatidylserine decarboxylase homolog [Mus musculus], full insert sequence. [AK161130]
12	A_51_P101929	Lgals3	16854	9.516	1.393	0.009	0	6.759	9.311	8.425	8.81	9.228	8.597	8.659	8.89	11.04	9.749	10.466	10.073	9.952	10.006	10.385	Mm.248615	Mus musculus lectin, galactose binding, soluble 3 (Lgals3), mRNA [NM_010705]	chr14:42712515-42713331
13	A_51_P346938	Lrg1	76905	8.23	1.315	1	0.034	1.426	8.082	7.374	7.74	8.048	7.611	8.411	7.63	8.474	7.962	8.936	9.452	9.394	10.717	9.164	Mm.348025	Mus musculus leucine-rich alpha-2-glycoprotein 1 (Lrg1), mRNA [NM_029796]	chr17:54278146-54278087
14	A_51_P303424	Itgax	16411	7.569	1.304	0.001	0	8.296	6.619	6.91	6.925	7.508	6.897	6.846	6.9	8.9	8.037	8.072	8.36	8.144	7.988	8.233	Mm.22378	Mus musculus integrin alpha X (Itgax), mRNA [NM_021334]	chr7:124247096-124247155
15	A_51_P165185	Cldn7	53624	7.875	1.16	0	0	9.058	7.349	7.33	7.082	6.746	7.041	7.181	7.248	8.245	8.976	8.346	7.949	8.064	8.356	8.161	Mm.281896	Mus musculus claudin 7 (Cldn7), mRNA [NM_016887]	chr11:70048852-70049161
16	A_51_P316935	8430408G22Rik	213393	7.985	1.154	0.451	0.008	3.366	6.929	7.637	7.648	7.697	7.859	7.413	7.268	9.11	8.139	8.514	8.142	8.283	9.669	8.674	Mm.38231	Mus musculus RIKEN cDNA 8430408G22 gene (8430408G22Rik), mRNA [NM_145980]	chr6:116678880-116678939
17	A_51_P154668	4933439C20Rik	236604	13.887	1.106	0.011	0.001	6.553	13.576	13.205	13.562	13.004	13.314	13.363	13.117	14.123	14.197	14.595	14.878	14.992	14.192	13.906	Mm.247625	Mus musculus RIKEN cDNA 4933439C20 gene (4933439C20Rik), mRNA [NM_001004146]	chr11:3083835-3083894
18	A_51_P445726	Lilrb3	18733	8.197	1.095	0	0	9.368	7.761	7.857	7.792	7.819	7.272	7.851	7.449	8.852	8.227	8.76	9.078	9.135	8.814	8.598	Mm.3189	Mus musculus leukocyte immunoglobulin-like receptor, subfamily B (with TM and ITIM domains), member 3 (Lilrb3), mRNA [NM_011095]	chr7:3335564-3335505
19	A_51_P445728	Lilrb3	18733	8.456	1.059	0.369	0.007	3.544	8.171	7.888	8.068	8.531	7.62	7.86	7.527	8.856	8.31	8.687	9.681	9.458	9.209	8.873	Mm.3189	Mus musculus leukocyte immunoglobulin-like receptor, subfamily B (with TM and ITIM domains), member 3 (Lilrb3), mRNA [NM_011095]	chr7:3335574-3335515
20	A_51_P444447	Cebpd	12609	11.644	1.025	0.108	0.003	4.614	11.938	10.677	10.714	11.466	11.338	11.151	10.75	12.011	12.466	12.198	12.15	12.105	12.454	11.825	Mm.347407	Mus musculus CCAAT/enhancer binding protein (C/EBP), delta (Cebpd), mRNA [NM_007679]	chr16:15431723-15431782
21	A_51_P186703	Fbln5	23876	10.68	1.014	1	0.062	0.677	10.546	9.678	9.884	10.948	9.655	10.54	10.008	10.793	10.152	11.519	11.632	11.694	11.286	11.286	Mm.288381	Mus musculus fibulin 5 (Fbln5), mRNA [NM_011812]	chr12:99245390-99245331
22	A_51_P364485	Tnfaip2	21928	7.973	1.009	0.037	0.001	5.541	7.162	7.716	7.537	7.785	7.327	7.684	7.681	8.713	9.291	8.596	8.461	8.38	8.035	8.478	Mm.255332	Mus musculus tumor necrosis factor, alpha-induced protein 2 (Tnfaip2), mRNA [NM_009396]	chr12:108971166-108971225
23	A_51_P378789	Cxcl13	55985	6.643	0.963	0.017	0.001	6.191	6.074	6.077	6.359	6.049	6.491	6.496	6.249	7.472	7.859	7.244	6.739	7.35	6.947	6.922	Mm.10116	Mus musculus chemokine (C-X-C motif) ligand 13 (Cxcl13), mRNA [NM_018866]	chr5:95174192-95174251
24	A_51_P112966	Ch25h	12642	7.408	0.95	0.394	0.007	3.485	6.751	6.839	7.176	7.24	7.011	7.525	7.075	7.957	7.519	8.047	7.919	7.989	8.955	7.879	Mm.30824	Mus musculus cholesterol 25-hydroxylase (Ch25h), mRNA [NM_009890]	chr19:34175291-34175232
25	A_51_P277216	Ms4a7	109225	7.581	0.934	0.001	0	8.55	7.04	7.146	7.393	7.053	7.187	7.586	7.341	8.453	8.567	7.862	8.072	8.104	7.964	8.262	Mm.193094	Mus musculus membrane-spanning 4-domains, subfamily A, member 7 (Ms4a7), transcript variant 1, mRNA [NM_027836]	chr19:11002436-11001661
26	A_52_P249514	Ccl12	20293	7.964	0.88	1	0.031	1.554	7.797	7.235	7.881	7.562	7.413	8.209	7.575	8.708	7.684	8.572	8.975	8.993	8.743	8.157	Mm.867	Mus musculus chemokine (C-C motif) ligand 12 (Ccl12), mRNA [NM_011331]	chr11:82184783-82184842
27	A_51_P345367	Psmb8	16913	10.499	0.878	1	0.014	2.663	10.866	9.732	9.816	10.064	9.497	10.101	10.066	10.71	11.224	10.837	10.843	11.043	11.087	10.542	Mm.180191	Mus musculus proteosome (prosome, macropain) subunit, beta type 8 (large multifunctional peptidase 7) (Psmb8), mRNA [NM_010724]	chr17:32280668-32280727
28	A_51_P390538	Mpeg1	17476	12.517	0.876	0	0	12.382	12.217	12.108	12.044	12.072	11.924	12.198	12.224	13.329	12.981	12.871	13.044	12.918	12.875	12.902	Mm.3999	PREDICTED: Mus musculus macrophage expressed gene 1, transcript variant 1 (Mpeg1), mRNA [XM_129176]	chr19:12145020-12145079
29	A_52_P571419		NA	10.03	0.866	1	0.017	2.376	9.226	9.388	9.675	9.637	9.361	9.411	9.801	10.391	10.13	10.67	10.86	10.89	9.739	9.881	Mm.342177	Mus musculus partial mRNA for immunoglobulin heavy chain constant region mu (IGHM gene). [AJ294737]	chr12:110942298-110942239
30	A_52_P452689	Atf3	11910	8.299	0.844	0.795	0.011	2.866	8.508	7.999	7.466	7.763	7.506	7.98	7.716	8.83	8.308	8.667	8.738	8.807	8.768	8.728	Mm.2706	Mus musculus activating transcription factor 3 (Atf3), mRNA [NM_007498]	chr1:190724233-190724174
31	A_51_P449824	4933417E01Rik	74463	7.365	0.843	1	0.045	1.044	7.121	7.034	7.005	6.496	6.891	6.934	7.149	7.835	9.02	7.294	7.656	7.87	7.499	7.358	Mm.333647	Mus musculus RIKEN cDNA 4933417E01 gene (4933417E01Rik), mRNA [NM_028954]	chr7:17178796-17178855
32	A_51_P502456	LOC630499	630499	12.49	0.843	0.051	0.002	5.263	12.701	12.002	12.099	12.113	11.853	11.977	12.008	13.099	13.008	12.67	13.004	13	13.016	12.859	Mm.422886	PREDICTED: Mus musculus similar to H-2 class I histocompatibility antigen, D-K alpha chain precursor (H-2D(K)), transcript variant 6 (LOC630499), mRNA [XM_001001527]	chr17:32053324-32053265
33	A_51_P160754	Apobec1	11810	8.551	0.835	1	0.016	2.465	8.221	8.192	8.318	8.351	8.09	8.358	8.184	9.22	10.152	9.007	8.99	8.875	8.588	8.723	Mm.3333	Mus musculus apolipoprotein B editing complex 1 (Apobec1), mRNA [NM_031159]	chr6:122614881-122614822
34	A_51_P105078	S100a4	20198	11.119	0.825	1	0.037	1.305	10.8	10.479	10.594	10.851	10.401	10.948	10.654	11.48	10.676	11.94	11.964	11.881	11.354	11.209	Mm.3925	Mus musculus S100 calcium binding protein A4 (S100a4), mRNA [NM_011311]	chr3:90736122-90736182
35	A_51_P392687	Vim	22352	13.128	0.798	1	0.098	0.134	12.745	12.258	12.802	12.993	12.525	13.346	13.077	14.216	12.776	13.953	13.705	13.827	13.368	13.487	Mm.268000	Mus musculus vimentin (Vim), mRNA [NM_011701]	chr2:13521763-13521822
36	A_52_P338956	A530050D06Rik	104816	11.328	0.79	1	0.037	1.289	11.547	10.315	11.014	11.116	10.47	11.298	10.832	11.982	11.136	12.138	11.868	11.863	11.524	11.609	Mm.77133	PREDICTED: Mus musculus RIKEN cDNA A530050D06 gene, transcript variant 1 (A530050D06Rik), mRNA [XM_203596]	chr12:109652429-109652488
37	A_51_P137419	Cst7	13011	6.506	0.786	0.506	0.008	3.265	6.375	6.353	6.106	6.007	5.963	6.012	6.076	7.349	6.778	7.134	6.475	6.935	6.781	6.945	Mm.12965	Mus musculus cystatin F (leukocystatin) (Cst7), mRNA [NM_009977]	chr2:150319611-150319670
38	A_51_P237754	H2-T23	15040	13.355	0.786	0.331	0.006	3.638	13.667	13.046	12.76	12.989	12.595	13.101	12.958	13.841	13.919	13.467	13.869	13.885	14.009	13.626	Mm.195061	Mus musculus histocompatibility 2, T region locus 23 (H2-T23), mRNA [NM_010398]	chr17:34134671-34134435
39	A_52_P582814	H2-Q1	15006	11.945	0.785	0.051	0.002	5.271	12.282	11.628	11.444	11.504	11.223	11.589	11.466	12.396	12.504	12.148	12.392	12.457	12.485	12.252	Mm.33263	Mus musculus 16 days neonate thymus cDNA, RIKEN full-length enriched library, clone:A130027C03 product:histocompatibility 2, Q region locus 4, full insert sequence. [AK037574]	chr17:33480880-33480939
40	A_51_P319460	Osmr	18414	9.022	0.785	1	0.016	2.461	8.505	8.253	8.732	9.039	8.685	9.149	8.671	9.515	8.726	9.512	9.681	9.779	9.879	9.439	Mm.10760	Mus musculus oncostatin M receptor (Osmr), mRNA [NM_011019]	chr15:6640492-6640433
41	A_51_P204486	1200009I06Rik	74190	10.47	0.783	0.025	0.001	5.881	10.095	10.07	10.234	9.969	9.767	9.794	10.225	10.819	10.672	10.594	11.198	11.058	10.635	10.66	Mm.248640	Mus musculus RIKEN cDNA 1200009I06 gene (1200009I06Rik), mRNA [NM_028807]	chr12:108947471-108947530
42	A_51_P345366	Psmb8	16913	10.441	0.78	1	0.015	2.519	10.732	9.802	9.808	10.069	9.632	10.097	9.971	10.583	11.164	10.743	10.915	10.921	11.007	10.236	Mm.180191	Mus musculus proteosome (prosome, macropain) subunit, beta type 8 (large multifunctional peptidase 7) (Psmb8), mRNA [NM_010724]	chr17:32280725-32281049
43	A_51_P369803	Psmb9	16912	10.25	0.777	1	0.028	1.708	10.804	9.57	9.866	9.887	9.46	9.827	9.443	10.35	10.847	10.387	10.689	10.699	10.936	10.386	Mm.390983	Mus musculus proteosome (prosome, macropain) subunit, beta type 9 (large multifunctional peptidase 2) (Psmb9), mRNA [NM_013585]	chr17:32262206-32262147
44	A_51_P428708	C4b	12268	12.323	0.774	0.292	0.006	3.747	12.009	11.645	12.22	11.809	11.781	12.014	12.003	12.676	12.284	12.42	13.128	13.095	12.712	12.588	Mm.18845	Mus musculus complement component 4B (Childo blood group) (C4b), mRNA [NM_009780]	chr17:32815620-32815561
45	A_51_P496996	H2-D1	14964	12.924	0.772	0.103	0.003	4.66	13.017	12.84	12.454	12.498	12.203	12.499	12.524	13.487	13.675	13.078	13.387	13.404	13.325	13.083	Mm.33263	Mus musculus histocompatibility 2, D region locus 1 (H2-D1), mRNA [NM_010380]	chr17:033361850-033362082
46	A_52_P422338	Pisd	320951	12.196	0.742	1	0.055	0.806	11.476	12.17	12.02	11.326	11.893	11.577	12.133	12.519	12.658	12.571	12.832	12.872	11.99	12.347	Mm.273765	Mus musculus phosphatidylserine decarboxylase (Pisd), mRNA [NM_177298]	chr5:31800075-31800021
47	A_51_P261517	Tyrobp	22177	11.512	0.74	0.006	0	7.16	11.46	10.915	11.098	11.265	10.958	11.442	11.312	12.016	11.822	12.098	12.015	12.032	11.813	11.834	Mm.46301	Mus musculus TYRO protein tyrosine kinase binding protein (Tyrobp), mRNA [NM_011662]	chr7:27358831-27360558
48	A_52_P59124	Ms4a7	109225	7.237	0.737	0.167	0.004	4.236	6.652	6.981	6.993	7.076	6.874	7.287	7.033	7.899	8.129	7.407	7.729	7.69	7.509	7.693	Mm.193094	Mus musculus membrane-spanning 4-domains, subfamily A, member 7 (Ms4a7), transcript variant 1, mRNA [NM_027836]	chr19:11001698-11001639
49	A_51_P129012	B2m	12010	12.789	0.735	1	0.026	1.838	13.14	11.876	12.462	12.463	12.097	12.785	12.425	13.279	13.005	13.299	13.245	13.37	13.472	12.726	Mm.163	Mus musculus beta-2 microglobulin (B2m), mRNA [NM_009735]	chr2:121893518-121893577
50	A_51_P262079	H2-Q7	15018	12.436	0.732	0.327	0.006	3.649	12.729	12.175	12.002	12.086	11.925	11.929	11.771	12.817	12.887	12.502	12.973	12.956	12.945	12.662	Mm.33263	Mus musculus histocompatibility 2, Q region locus 7 (H2-Q7), mRNA [NM_010394]	chr17:33494682-33494913
51	A_51_P444565		NA	13.017	0.729	0.572	0.009	3.157	13.37	12.64	12.725	12.725	12.447	12.616	12.408	13.396	13.503	13.091	13.548	13.576	13.611	13.305	Mm.195061	PREDICTED: Mus musculus histocompatibility 2, T region locus 23, transcript variant 2 (H2-T23), mRNA [XM_904658]	chr17:32053862-32053803
52	A_51_P509573	Ccl4	20303	7.063	0.726	1	0.016	2.42	6.378	6.67	6.771	7.013	6.703	6.615	6.757	7.329	7.304	7.203	7.806	7.539	7.301	7.508	Mm.244263	Mus musculus chemokine (C-C motif) ligand 4 (Ccl4), mRNA [NM_013652]	chr11:83734455-83734514
53	A_51_P122321	9230117N10Rik	77125	11.988	0.721	0.003	0	7.726	11.414	11.368	11.529	11.608	11.672	11.845	11.648	12.512	12.248	12.457	12.296	12.269	12.076	12.275	Mm.182359	Mus musculus RIKEN cDNA 9230117N10 gene (9230117N10Rik), mRNA [NM_133775]	chr19:29660344-29660403
54	A_51_P198434	H2-K1	14972	12.602	0.718	1	0.084	0.339	13.405	12.015	12.216	12.255	11.864	12.388	12.167	13.269	12.883	13.004	13.051	13.104	13.311	12.716	Mm.422886	Mus musculus histocompatibility 2, K1, K region, mRNA (cDNA clone MGC:91227 IMAGE:4947189), complete cds. [BC080756]	chr17:32074504-32074445
55	A_52_P463977	1110007F12Rik	68487	10.276	0.716	1	0.102	0.069	10.418	9.488	10.091	10.566	9.895	10.126	9.643	10.338	11.441	10.637	10.989	11.009	10.644	10.183	Mm.248440	Mus musculus RIKEN cDNA 1110007F12 gene (1110007F12Rik), mRNA [NM_197986]	chr6:34804974-34805033
56	A_51_P465281	Lgals1	16852	12.162	0.714	1	0.088	0.278	11.896	11.242	12.051	12.374	11.678	12.361	11.647	12.49	12.151	12.896	13.013	12.927	12.132	12.636	Mm.43831	Mus musculus lectin, galactose binding, soluble 1 (Lgals1), mRNA [NM_008495]	chr15:79013088-79013147
57	A_51_P140321	Mocos	68591	8.852	0.713	1	0.014	2.654	7.638	8.672	8.563	8.648	8.493	8.651	8.511	9.122	9.366	9.318	9.463	9.07	8.922	8.908	Mm.28252	PREDICTED: Mus musculus molybdenum cofactor sulfurase, transcript variant 1 (Mocos), mRNA [XM_484710]	chr18:25086046-25086105
58	A_51_P219789	H2-Q2	15013	13.005	0.711	0.461	0.008	3.347	13.307	12.72	12.678	12.677	12.409	12.526	12.428	13.381	13.553	13.098	13.433	13.484	13.487	13.287	Mm.33263	Mus musculus histocompatibility 2, Q region locus 2 (H2-Q2), mRNA [NM_010392]	chr17:33440548-33440607
59	A_51_P461138	Pdlim1	54132	10.479	0.695	1	0.024	1.978	9.842	9.907	9.898	10.768	10.047	10.533	10.114	10.62	10.84	11.001	10.802	11.059	10.626	11.028	Mm.5567	Mus musculus PDZ and LIM domain 1 (elfin) (Pdlim1), mRNA [NM_016861]	chr19:40116277-40116218
60	A_51_P384318	C1r	50909	7.436	0.694	1	0.041	1.164	7.335	6.864	7.416	7.289	7.136	7.525	7.038	7.707	7.531	8.159	8.072	8.554	7.404	8.035	Mm.333375	Mus musculus complement component 1, r subcomponent (C1r), mRNA [NM_023143]	chr6:124605948-124606007
61	A_51_P454873	Npy	109648	11.197	0.692	1	0.108	0.008	10.928	11.4	10.506	10.455	10.699	11.065	10.823	11.463	11.997	11.592	11.24	11.288	11.947	11.19	Mm.154796	Mus musculus neuropeptide Y (Npy), mRNA [NM_023456]	chr6:49783794-49787556
62	A_52_P678096	Tsp50	235631	7.676	0.686	0.622	0.009	3.083	6.66	7.378	7.21	7.627	7.201	7.136	7.188	7.596	7.97	7.524	8.206	8.082	8.003	7.824	Mm.102265	Mus musculus testes-specific protease 50 (Tsp50), mRNA [NM_146227]	chr9:110560095-110560154
63	A_51_P331831	Hvcn1	74096	8.064	0.682	1	0.024	1.962	7.173	7.875	7.763	8.188	7.636	7.547	7.681	8.415	8.324	8.064	8.907	8.5	8.208	8.218	Mm.28804	Mus musculus hydrogen voltage-gated channel 1 (Hvcn1), transcript variant 2, mRNA [NM_028752]	chr5:121476234-121476293
64	A_51_P151182	Ifi202b	26388	8.064	0.672	1	0.032	1.488	7.612	7.426	8.642	7.826	7.798	8.069	7.644	8.483	8.518	8.536	8.832	8.734	8.428	8.188	Mm.218770	Mus musculus interferon activated gene 202B (Ifi202b), mRNA [NM_011940]	chr1:173929836-173928807
65	A_51_P273921	Capg	12332	9.181	0.664	0.09	0.003	4.779	8.892	8.442	9.036	9.074	8.724	8.975	8.822	9.404	9.387	9.48	9.834	9.785	9.39	9.335	Mm.18626	Mus musculus capping protein (actin filament), gelsolin-like (Capg), transcript variant 1, mRNA [NM_007599]	chr6:72579003-72580755
66	A_52_P67212	2900052N01Rik	73040	10.126	0.664	1	0.034	1.407	9.428	9.721	9.842	9.555	10.039	10.093	9.832	9.857	10.517	10.544	10.51	10.432	10.946	10.353	Mm.265384	Mus musculus adult male hippocampus cDNA, RIKEN full-length enriched library, clone:C630003E24 product:unclassifiable, full insert sequence [AK049847]	chr9:46874391-46881286
67	A_51_P172155	Hal	15109	7.191	0.662	1	0.037	1.291	6.999	6.834	6.993	6.564	7.108	6.987	6.808	8.043	7.139	7.738	7.297	7.802	7.354	7.557	Mm.13000	Mus musculus histidine ammonia lyase (Hal), mRNA [NM_010401]	chr10:93075295-93075354
68	A_52_P700056		NA	7.978	0.657	0.47	0.008	3.329	7.458	7.488	7.924	7.577	7.823	8.047	7.547	8.191	8.086	8.139	8.301	8.432	8.542	8.77	Mm.24097	Mus musculus cDNA clone MGC:107680 IMAGE:6766535, complete cds. [BC089618]	chr11:83774846-83776030
69	A_51_P452629	Tlr2	24088	9.252	0.647	0.617	0.009	3.091	8.846	8.799	8.842	9.202	8.822	8.928	8.996	9.917	9.649	9.843	9.521	9.304	9.317	9.414	Mm.87596	Mus musculus toll-like receptor 2 (Tlr2), mRNA [NM_011905]	chr3:83941532-83941473
70	A_51_P496997	H2-Q10	15007	13.048	0.641	1	0.027	1.802	13.295	12.861	12.681	12.755	12.436	12.603	12.57	13.239	13.586	12.944	13.483	13.504	13.551	13.384	Mm.88795	Mus musculus histocompatibility 2, Q region locus 10 (H2-Q10), mRNA [NM_010391]	chr17:33574106-33574165
71	A_51_P102789	C1qc	12262	11.56	0.641	0.541	0.009	3.205	11.575	10.998	11.236	11.393	11.145	11.224	11.027	11.835	11.797	11.78	12.168	12.169	11.921	11.416	Mm.2570	Mus musculus complement component 1, q subcomponent, C chain (C1qc), mRNA [NM_007574]	chr4:136268347-136268288
72	A_51_P514712	Parp14	547253	9.363	0.641	1	0.089	0.27	9.713	8.618	9.206	9.147	8.712	9.281	8.855	9.654	9.679	9.692	10.043	10.038	9.669	9.243	Mm.244406	Mus musculus poly (ADP-ribose) polymerase family, member 14 (Parp14), mRNA [NM_001039530]	chr16:35507178-35507119
73	A_51_P460954	Ccl6	20305	8.39	0.637	0.017	0.001	6.221	7.906	8.298	8.048	8.221	7.98	8.074	7.86	8.742	8.496	8.591	8.848	8.799	8.917	8.455	Mm.137	Mus musculus chemokine (C-C motif) ligand 6 (Ccl6), mRNA [NM_009139]	chr11:83658459-83658400
74	A_51_P129006	B2m	12010	11.029	0.635	1	0.074	0.48	11.402	10.026	10.911	10.868	10.516	10.858	10.481	11.295	11.075	11.454	11.42	11.48	11.65	11.134	Mm.163	Mus musculus beta-2 microglobulin (B2m), mRNA [NM_009735]	chr2:121893642-121893698
75	A_51_P130095	Fcgr2b	14130	8.771	0.633	1	0.015	2.556	8.257	8.35	8.626	8.991	8.354	8.647	8.397	9.497	8.841	8.895	9.276	9.152	9.225	9.169	Mm.425062	Mus musculus Fc receptor, IgG, low affinity IIb (Fcgr2b), mRNA [NM_010187]	chr1:170937392-170937333
76	A_52_P326657	BC030183	230766	7.971	0.63	1	0.015	2.535	7.584	7.688	7.681	7.485	7.648	7.646	7.63	7.964	8.902	8.047	8.348	8.458	8.091	7.963	Mm.20377	Mus musculus cDNA sequence BC030183 (BC030183), mRNA [NM_182783]	chr4:129021730-129021671
77	A_52_P295933	Eya4	14051	8.654	0.627	0.304	0.006	3.713	7.799	8.184	8.533	8.26	8.624	8.437	8.419	9.161	8.955	8.936	8.941	8.904	8.93	8.814	Mm.332128	Mus musculus 9.5 days embryo parthenogenote cDNA, RIKEN full-length enriched library, clone:B130023L16 product:unclassifiable, full insert sequence. [AK045060]	chr10:22859995-22859936
78	A_51_P246066	Slamf9	98365	8.149	0.622	0.089	0.003	4.786	7.879	7.819	7.92	8.072	7.68	7.838	7.761	8.454	8.526	8.271	8.716	8.693	8.171	8.488	Mm.150050	Mus musculus SLAM family member 9 (Slamf9), mRNA [NM_029612]	chr1:172448497-172448556
79	A_52_P428354	H2-Q10	15007	10.953	0.617	1	0.027	1.798	11.083	10.918	10.443	10.583	10.399	10.506	10.613	11.204	11.594	10.897	11.187	11.239	11.528	11.214	Mm.88795	Mus musculus histocompatibility 2, Q region locus 10 (H2-Q10), mRNA [NM_010391]	chr17:33571803-33571862
80	A_51_P256342	Anxa4	11746	8.908	0.617	1	0.023	2.054	8.445	8.523	8.915	8.841	8.594	8.814	8.498	9.219	9.714	9.214	9.501	9.316	8.824	9.158	Mm.259702	Mus musculus annexin A4 (Anxa4), mRNA [NM_013471]	chr6:86812175-86812115
81	A_51_P282930	Rorc	19885	8.464	0.616	1	0.098	0.128	7.744	8.039	8.198	8.564	8.118	8.055	8.253	8.556	9.5	8.697	8.988	8.741	8.528	8.273	Mm.4372	Mus musculus RAR-related orphan receptor gamma (Rorc), mRNA [NM_011281]	chr3:94271636-94271695
82	A_51_P128987	Akr1b8	14187	10.471	0.614	1	0.025	1.894	10.425	9.777	10.247	10.456	9.982	10.062	9.977	10.426	10.774	11.148	10.932	10.9	10.529	10.514	Mm.5378	Mus musculus aldo-keto reductase family 1, member B8 (Akr1b8), mRNA [NM_008012]	chr6:34299546-34299605
83	A_52_P112017	Tspo	12257	9.938	0.612	1	0.035	1.374	10.079	9.318	9.795	9.809	9.409	9.665	9.4	9.942	10.593	10.302	10.506	10.443	10.056	9.918	Mm.1508	Mus musculus benzodiazepine receptor, peripheral (Bzrp), mRNA [NM_009775]	chr15:83654536-83654595
84	A_51_P400752	H2-Q5	15016	12.824	0.612	0.215	0.005	4.018	12.93	12.674	12.643	12.349	12.484	12.349	12.296	13.119	13.414	12.87	13.182	13.219	13.19	13.011	Mm.195061	Mus musculus histocompatibility 2, Q region locus 5 (H2-Q5), mRNA [NM_010393]	chr17:034255511-034255077
85	A_51_P177744	Zc3hav1	78781	8.606	0.609	0.17	0.004	4.223	7.991	8.217	8.347	8.613	8.163	8.389	8.239	8.837	9.166	8.729	9.039	9.107	8.748	8.592	Mm.25243	Mus musculus zinc finger CCCH type, antiviral 1 (Zc3hav1), mRNA [NM_028864]	chr6:38246726-38246667
86	A_51_P349546	Cd109	235505	8.273	0.609	0.255	0.006	3.867	7.609	7.888	8.365	7.919	7.867	8.074	8.067	8.715	8.406	8.751	8.59	8.693	8.55	8.346	Mm.32955	Mus musculus CD109 antigen (Cd109), mRNA [NM_153098]	chr9:78790906-78790965
87	A_51_P240421	Pcdhb14	93885	9.323	0.609	0.009	0	6.769	9.127	8.991	8.989	9.082	8.956	8.866	8.948	9.66	9.521	9.784	9.735	9.723	9.444	9.352	Mm.196699	Mus musculus protocadherin beta 14 (Pcdhb14), mRNA [NM_053139]	chr18:37826568-37826627
88	A_51_P181451	C1qa	12259	11.82	0.609	0.004	0	7.385	11.372	11.594	11.659	11.529	11.54	11.634	11.624	12.314	12.247	11.946	12.385	12.267	12.023	12.029	Mm.2570	Mus musculus complement component 1, q subcomponent, alpha polypeptide (C1qa), mRNA [NM_007572]	chr4:136274990-136274931
89	A_51_P265571	Adm	11535	8.053	0.608	1	0.028	1.695	7.86	7.624	7.652	8.091	7.969	8.008	7.444	8.489	7.941	8.379	8.374	8.429	8.673	8.619	Mm.1408	Mus musculus adrenomedullin (Adm), mRNA [NM_009627]	chr7:106544845-106544904
90	A_52_P220879	Tgm2	21817	11.701	0.602	0.743	0.011	2.925	11.665	11.133	11.554	11.747	11.268	11.886	11.429	11.954	11.788	12.163	12.275	12.291	12.203	12.222	Mm.330731	Mus musculus transglutaminase 2, C polypeptide (Tgm2), mRNA [NM_009373]	chr2:157857488-157857429
91	A_51_P417612	H2-D4	14967	11.068	0.602	1	0.084	0.34	11.307	10.996	10.767	10.669	10.551	10.551	10.669	11.342	11.725	11.061	11.136	11.304	11.687	11.466	Mm.387141	Mus musculus histocompatibility 2, D region locus 4 (H2-D4), mRNA [NM_008200]	chr17:033359261-033359314
92	A_52_P87713	Timp1	21857	9.26	0.602	1	0.025	1.908	8.787	8.666	9.269	9.293	9.004	9.365	9.1	9.65	9.97	9.856	9.777	9.726	9.251	9.464	Mm.8245	Mus musculus tissue inhibitor of metalloproteinase 1 (Timp1), mRNA [NM_011593]	chrX:19307699-19307758
93	A_51_P453475	Slc1a5	20514	8.694	0.599	1	0.094	0.207	7.98	8.24	8.855	8.849	8.305	8.546	8.355	9.122	9.116	9.38	8.924	9.027	8.789	8.965	Mm.1056	Mus musculus solute carrier family 1 (neutral amino acid transporter), member 5 (Slc1a5), mRNA [NM_009201]	chr7:14562181-14562240
94	A_52_P368690		NA	7.17	0.599	1	0.033	1.455	6.742	6.981	7.035	6.967	7.081	7.203	6.821	7.478	7.259	7.789	7.579	7.985	7.581	7.351		Q80UL9 (Q80UL9) Adhesion molecule AMICA, partial (20%) [TC1537769]	chr9:45042541-45042600
95	A_51_P368171	AU020206	101757	10.347	0.598	1	0.023	2.013	10.45	9.8	10.182	9.904	9.862	10.065	10.199	10.393	10.408	10.384	10.918	11.022	10.713	10.813	Mm.200422	Mus musculus 7 days embryo whole body cDNA, RIKEN full-length enriched library, clone:C430005K08 product:unclassifiable, full insert sequence [AK049415]	chr7:71621193-71621133
96	A_51_P222657	Tspo	12257	10.113	0.598	1	0.045	1.055	10.281	9.495	9.951	9.966	9.612	9.834	9.575	10.07	10.821	10.474	10.675	10.555	10.215	10.091	Mm.1508	Mus musculus benzodiazepine receptor, peripheral (Bzrp), mRNA [NM_009775]	chr15:83654542-83654601
97	A_52_P6070	4931408A02Rik	70967	9.385	0.597	0.148	0.004	4.345	9.07	9.019	9.04	9.198	8.856	9.198	9.078	9.332	9.492	9.829	9.826	10.061	9.584	9.514	Mm.253077	Mus musculus adult male testis cDNA, RIKEN full-length enriched library, clone:4931408A02 product:hypothetical D-galactoside/L-rhamnose binding SUEL lectin domain containing protein, full insert sequence. [AK016443]	chr16:90954222-90954281
98	A_52_P474242	H2-K1	14972	10.757	0.596	1	0.048	0.956	10.984	10.611	10.296	10.434	10.143	10.571	10.424	11.151	11.337	10.853	10.87	10.927	11.322	11.177	Mm.422886	Mus musculus bone marrow macrophage cDNA, RIKEN full-length enriched library, clone:I830158M06 product:histocompatibility 2, K region, full insert sequence. [AK153419]	chr17:32078115-32077868
99	A_52_P57582		NA	11.966	0.59	1	0.098	0.125	12.421	11.76	11.483	11.62	11.294	11.611	11.59	12.215	12.479	11.895	12.286	12.317	12.396	12.321			chr17:34276045-34275870
100	A_52_P317102	2900052N01Rik	73040	8.857	0.589	1	0.028	1.7	8.603	8.662	8.342	8.605	8.643	8.727	8.453	9.395	9.078	8.694	9.124	9.225	9.545	9.098	Mm.265384	Mus musculus adult male hippocampus cDNA, RIKEN full-length enriched library, clone:C630003E24 product:unclassifiable, full insert sequence [AK049847]	chr9:46887185-46887244
101	A_51_P351860	C1qb	12260	10.477	0.588	1	0.014	2.655	10.543	10.14	10.071	10.316	9.992	10.188	10.067	10.608	10.77	10.442	11.023	11.092	10.876	10.624	Mm.2570	Mus musculus complement component 1, q subcomponent, beta polypeptide (C1qb), mRNA [NM_009777]	chr4:136259159-136259100
102	A_52_P523516	Hapln2	73940	9.855	0.588	1	0.031	1.559	9.302	8.991	9.367	9.883	9.577	9.592	9.609	10.082	9.72	9.95	10.088	10.098	10.407	10.091	Mm.294467	Mus musculus hyaluronan and proteoglycan link protein 2 (Hapln2), mRNA [NM_022031]	chr3:88136174-88136115
103	A_51_P166648	4931408A02Rik	70967	10.759	0.586	0.234	0.005	3.945	10.494	10.109	10.641	10.713	10.269	10.566	10.362	10.812	11.037	11.163	11.246	11.18	10.958	10.863	Mm.253077	Mus musculus adult male testis cDNA, RIKEN full-length enriched library, clone:4931408A02 product:hypothetical D-galactoside/L-rhamnose binding SUEL lectin domain containing protein, full insert sequence. [AK016443]	chr16:90954472-90954531
104	A_51_P120470	Cd68	12514	8.638	0.583	0.03	0.001	5.726	8.175	8.345	8.433	8.533	8.426	8.391	8.179	9.142	8.848	8.739	8.99	9.125	8.757	8.963	Mm.15819	Mus musculus CD68 antigen (Cd68), mRNA [NM_009853]	chr11:69746445-69746386
105	A_52_P529195	Pcdhb4	93875	7.554	0.582	1	0.028	1.697	6.806	7.254	7.457	6.8	7.402	7.469	7.527	7.785	7.976	8.01	7.564	7.811	7.803	7.838	Mm.196711	Mus musculus protocadherin beta 4 (Pcdhb4), mRNA [NM_053129]	chr18:37686571-37686630
106	A_51_P445574	Nags	217214	8.392	0.582	1	0.028	1.693	7.879	8.428	8.027	7.887	7.798	8.016	8.067	8.64	8.948	8.587	8.438	8.547	8.812	8.202	Mm.31686	Mus musculus N-acetylglutamate synthase (Nags), transcript variant 2, mRNA [NM_178053]	chr11:102258443-102258501
107	A_51_P256344	Anxa4	11746	7.356	0.579	1	0.046	1.009	6.642	6.963	7.387	7.148	7.187	7.323	7.14	7.835	7.918	7.847	7.646	7.69	7.301	7.604	Mm.259702	Mus musculus annexin A4 (Anxa4), mRNA [NM_013471]	chr6:86812526-86812466
108	A_51_P408506	Icam1	15894	8.934	0.575	1	0.043	1.119	8.823	8.368	8.888	9.049	8.421	9.05	8.736	9.406	8.909	9.41	9.498	9.432	9.063	9.643	Mm.155033	Mus musculus intercellular adhesion molecule, mRNA (cDNA clone MGC:6195 IMAGE:3588949), complete cds [BC008626]	chr9:20905300-20905359
109	A_51_P269546	Trem2	83433	12.476	0.575	0.029	0.001	5.748	12.291	11.979	12.396	12.246	12.312	12.165	12.059	12.707	12.777	12.524	12.99	12.891	12.742	12.843	Mm.261623	Mus musculus triggering receptor expressed on myeloid cells 2 (Trem2), mRNA [NM_031254]	chr17:46496865-46496924
110	A_51_P484020	Cd300d	140497	10.516	0.572	0.05	0.002	5.277	10.038	10.345	10.309	10.452	10.132	10.152	10.146	10.795	10.972	10.81	10.83	10.782	10.718	10.675	Mm.2699	Mus musculus Cd300D antigen (Cd300d), mRNA [NM_134158]	chr11:115105909-115105850
111	A_51_P349988	Ggta1	14594	8.784	0.571	1	0.015	2.596	8.394	8.455	8.36	8.774	8.319	8.469	8.618	9.338	8.881	9.23	9.139	9.09	8.71	8.999	Mm.281124	Mus musculus glycoprotein galactosyltransferase alpha 1, 3 (Ggta1), mRNA [NM_010283]	chr2:35408046-35407985
112	A_52_P313279	LOC56628	56628	12.932	0.571	1	0.023	2.057	13.056	12.992	12.58	12.669	12.402	12.368	12.455	13.312	13.468	12.944	13.3	13.217	13.203	13.079	Mm.33263	Mus musculus MHC (A.CA/J(H-2K-f) class I antigen (LOC56628), mRNA [NM_019909]	chr17:033361545-033361604
113	A_51_P346874	1700112E06Rik	76633	9.747	0.571	0.309	0.006	3.698	9.612	9.027	9.427	9.652	9.527	9.512	9.239	9.752	10.232	9.994	10.045	10.141	9.991	9.839	Mm.361010	Mus musculus adult male testis cDNA, RIKEN full-length enriched library, clone:1700112E06 product:hypothetical Leucine-rich repeat/Immunoglobulin/major histocompatibility complex containing protein, full insert sequence. [AK007175]	chr14:20713625-20713684
114	A_51_P405478	Fcer1g	14127	9.419	0.569	0.007	0	6.913	8.896	9.115	9.383	9.326	9.19	9.323	9.024	9.846	9.711	9.715	9.681	9.759	9.714	9.817	Mm.22673	Mouse mast cell high affinity IgE receptor (Fc-epsilon-RI) gamma subunit mRNA, complete cds. [J05020]	chr1:171199880-171199808
115	A_51_P258372	Igsf6	80719	8.171	0.564	1	0.056	0.784	8.434	8.039	7.812	7.816	7.586	7.954	7.864	8.509	8.42	8.587	8.558	8.592	8.431	8.357	Mm.160384	Mus musculus immunoglobulin superfamily, member 6 (Igsf6), mRNA [NM_030691]	chr7:116986583-116986524
116	A_51_P422300	Ms4a6b	69774	8.086	0.563	1	0.038	1.254	7.697	7.875	7.96	8.098	7.756	8.236	7.786	8.537	8.014	8.649	8.786	8.774	8.345	8.243	Mm.395441	Mus musculus membrane-spanning 4-domains, subfamily A, member 6B (Ms4a6b), mRNA [NM_027209]	chr19:11210020-11210079
117	A_52_P444628	Cybb	13058	6.779	0.552	0.17	0.004	4.224	6.541	6.541	6.732	6.466	6.602	6.861	6.515	7.226	6.924	7.128	7.214	7.301	7.128	7.202	Mm.200362	Mus musculus cytochrome b-245, beta polypeptide (Cybb), mRNA [NM_007807]	chrX:7870397-7870338
118	A_51_P330428	Eif4ebp1	13685	9.509	0.55	0.088	0.003	4.794	9.156	9.079	9.32	9.553	9.192	9.377	9.214	9.561	9.884	9.915	9.928	9.952	9.814	9.685	Mm.6700	Mus musculus eukaryotic translation initiation factor 4E binding protein 1 (Eif4ebp1), mRNA [NM_007918]	chr8:26030987-26031046
119	A_51_P425048	H2-Q1	15006	11.226	0.548	1	0.043	1.093	11.303	11.213	10.807	10.972	10.674	10.871	10.875	11.508	11.924	11.143	11.452	11.399	11.69	11.432	Mm.33263	Mus musculus histocompatibility 2, Q region locus 1 (H2-Q1), mRNA [NM_010390]	chr17:33416924-33418496
120	A_51_P251768	Emr1	13733	9.752	0.544	0.401	0.007	3.47	9.874	9.336	9.457	9.704	9.337	9.487	9.261	10.266	9.968	9.945	10.185	10.13	9.928	9.844	Mm.2254	Mus musculus EGF-like module containing, mucin-like, hormone receptor-like sequence 1 (Emr1), mRNA [NM_010130]	chr17:55686649-55686708
121	A_51_P493522	Kazald1	107250	11.732	0.543	1	0.032	1.51	11.294	10.926	11.535	11.64	11.785	11.348	11.309	11.833	12.321	11.989	11.798	11.84	11.957	11.898	Mm.24417	Mus musculus Kazal-type serine peptidase inhibitor domain 1 (Kazald1), mRNA [NM_178929]	chr19:44972930-44972989
122	A_51_P269549	Trem2	83433	10.143	0.541	0.258	0.006	3.858	9.901	9.958	9.757	9.804	9.815	9.79	9.958	10.265	10.559	10.146	10.691	10.603	10.242	10.265	Mm.261623	Mus musculus triggering receptor expressed on myeloid cells 2 (Trem2), mRNA [NM_031254]	chr17:46496563-46496699
123	A_52_P50496	H2-K1	14972	9.425	0.527	1	0.083	0.353	9.793	9.267	9.157	9.009	9.107	8.988	8.921	9.542	9.88	9.334	9.787	9.711	9.991	9.684	Mm.422886	Mus musculus bone marrow macrophage cDNA, RIKEN full-length enriched library, clone:I830158M06 product:histocompatibility 2, K region, full insert sequence. [AK153419]	chr17:32077737-32077678
124	A_51_P279841	Blnk	17060	10.891	0.526	1	0.043	1.101	10.895	10.597	10.537	10.874	10.816	10.586	10.263	11.173	10.992	10.845	11.421	11.255	11.413	11.15	Mm.9749	Mus musculus B-cell linker (Blnk), mRNA [NM_008528]	chr19:40822836-40822777
125	A_51_P455157	Mybpc2	233199	7.975	0.525	1	0.031	1.572	7.335	7.51	7.658	8	7.45	7.775	7.75	8.218	8.081	8.201	8.36	8.249	8.142	7.905	Mm.358888	Mus musculus myosin binding protein C, fast-type (Mybpc2), mRNA [NM_146189]	chr7:40676047-40675988
126	A_51_P328613	Fcgr3	14131	11.1	0.525	0.109	0.003	4.611	10.799	10.929	10.969	10.816	10.819	11.196	11.046	11.63	11.438	11.54	11.545	11.497	11.318	11.278	Mm.22119	Mus musculus Fc receptor, IgG, low affinity III (Fcgr3), mRNA [NM_010188]	chr1:171028067-171027992
127	A_52_P322141	Ccdc88	78317	11.806	0.519	0.35	0.007	3.59	11.521	11.383	11.557	11.569	11.54	11.252	11.365	11.582	11.807	12.051	12.04	12.038	12.238	12.063	Mm.329596	Mus musculus coiled-coil domain containing 88, mRNA (cDNA clone IMAGE:3369493), complete cds. [BC038890]	chr19:6664552-6664493
128	A_51_P109508	Havcr2	171285	8.589	0.513	1	0.032	1.513	8.229	8.319	8.175	8.617	8.231	8.279	8.23	8.828	8.816	8.808	9.155	8.964	8.776	8.325	Mm.72168	Mus musculus hepatitis A virus cellular receptor 2 (Havcr2), mRNA [NM_134250]	chr11:46437901-46437960
129	A_51_P349495	Mboat1	218121	9.629	0.512	1	0.026	1.844	9.185	8.995	9.46	9.357	9.54	9.621	9.545	10.081	9.927	9.94	9.648	9.845	9.735	10.113	Mm.89682	Mus musculus membrane bound O-acyltransferase domain containing 1 (Mboat1), mRNA [NM_153546]	chr13:29611931-29611990
130	A_51_P377452	Ncf4	17972	9.397	0.511	0.015	0.001	6.331	9.349	9.323	9.164	9.209	9.027	9.2	9.065	9.778	9.552	9.724	9.768	9.792	9.612	9.689	Mm.2068	Mus musculus neutrophil cytosolic factor 4 (Ncf4), mRNA [NM_008677]	chr15:78345425-78345484
131	A_52_P587738	P2ry2	18442	7.369	0.508	1	0.024	1.988	6.816	7.216	7.154	6.722	7.041	7.387	7.08	7.503	7.401	7.789	7.502	7.664	7.487	7.623	Mm.3000	Mus musculus purinergic receptor P2Y, G-protein coupled 2 (P2ry2), mRNA [NM_008773]	chr7:97043344-97043285
132	A_51_P511787	Casp4	12363	7.711	0.499	1	0.02	2.186	7.226	7.51	7.658	7.654	7.457	7.569	7.396	7.679	7.786	8.163	8.206	8.265	7.964	7.899	Mm.1569	Mus musculus caspase 4, apoptosis-related cysteine peptidase (Casp4), mRNA [NM_007609]	chr9:5253886-5253945
133	A_51_P129199	Plec1	18810	9.077	0.498	1	0.096	0.174	8.837	8.994	8.786	9.048	8.708	8.734	8.855	9.362	10.058	9.299	9.347	9.138	9.011	9.236	Mm.373750	Mus musculus plectin 1, mRNA (cDNA clone MGC:37782 IMAGE:5097449), complete cds. [BC024074]	chr15:76315816-76315757
134	A_51_P361620		NA	10.032	0.497	1	0.04	1.206	10.228	9.682	9.799	9.771	9.544	10.088	9.859	10.243	10.271	10.602	10.299	10.3	10.229	10.504	Mm.297655	Mus musculus mRNA similar to H2B histone family, member J (cDNA clone MGC:29103 IMAGE:5003093), complete cds. [BC019122]	chr3:96152781-96152840
135	A_52_P538363	Pcdhb2	93873	7.211	0.495	1	0.03	1.639	6.763	6.935	7.052	6.614	6.996	7.054	7.019	7.404	7.401	7.887	7.085	7.324	7.428	7.368	Mm.197508	Mus musculus protocadherin beta 2 (Pcdhb2), mRNA [NM_053127]	chr18:37673509-37673568
136	A_52_P635388	Ms4a11	64382	8.089	0.494	1	0.035	1.365	7.794	7.78	7.955	7.976	7.79	8.149	7.987	8.708	8.392	8.494	8.335	8.396	8.237	8.322	Mm.290390	Mus musculus membrane-spanning 4-domains, subfamily A, member 11 (Ms4a11), mRNA [NM_022431]	chr19:011270224-011270165
137	A_51_P436652	Ccl7	20306	6.667	0.492	1	0.108	0.018	6.454	6.288	6.69	6.206	6.452	6.899	6.446	7.143	6.719	7.174	6.622	7.301	6.781	7.137	Mm.341574	Mus musculus chemokine (C-C motif) ligand 7 (Ccl7), mRNA [NM_013654]	chr11:82128729-82128788
138	A_51_P452953	Rhod	11854	7.67	0.49	1	0.058	0.735	7.312	7.176	7.617	7.508	7.315	7.913	7.519	7.95	7.786	8.193	7.941	8.225	7.813	7.882	Mm.27701	Mus musculus ras homolog gene family, member D (Rhod), mRNA [NM_007485]	chr19:4320516-4320457
139	A_51_P405606	Ndrg1	17988	14.059	0.484	1	0.016	2.438	13.689	13.662	13.764	13.948	13.848	13.967	13.925	14.555	13.978	14.524	14.393	14.424	14.046	14.275	Mm.30837	Mus musculus N-myc downstream regulated gene 1 (Ndrg1), mRNA [NM_010884]	chr15:67013233-67013174
140	A_51_P405476	Fcer1g	14127	10.572	0.483	0.038	0.001	5.508	10.44	10.29	10.48	10.36	10.241	10.602	10.474	11.066	10.924	10.801	10.912	10.863	10.79	10.91	Mm.22673	Mus musculus Fc receptor, IgE, high affinity I, gamma polypeptide (Fcer1g), mRNA [NM_010185]	chr1:171199815-171199756
141	A_51_P423981	Ctss	13040	14.53	0.481	0.05	0.002	5.279	14.497	14.104	14.315	14.345	14.191	14.18	14.316	14.882	14.669	14.64	14.802	14.716	14.858	14.747	Mm.3619	Mus musculus cathepsin S (Ctss), mRNA [NM_021281]	chr3:95430189-95430248
142	A_52_P86935	Mocos	68591	7.205	0.478	1	0.09	0.252	6.669	7.165	7.278	6.54	7.041	7.098	6.982	7.516	7.589	7.548	7.205	7.534	7.186	7.539	Mm.28252	PREDICTED: Mus musculus molybdenum cofactor sulfurase, transcript variant 1 (Mocos), mRNA [XM_484710]	chr18:25073613-25073672
143	A_51_P494241	Bcl2a1b	12045	8.224	0.476	1	0.027	1.819	8.129	7.851	7.93	8.206	7.908	7.983	8.062	8.606	8.308	8.231	8.639	8.56	8.76	8.298	Mm.196770	Mus musculus B-cell leukemia/lymphoma 2 related protein A1b (Bcl2a1b), mRNA [NM_007534]	chr9:88829714-88837575
144	A_51_P432538	H2-T10	15024	11.186	0.466	1	0.031	1.557	11.267	10.652	11.006	11.134	10.89	10.877	10.619	11.554	11.337	11.364	11.385	11.34	11.468	11.259	Mm.195061	Mus musculus histocompatibility 2, T region locus 10 (H2-T10), mRNA [NM_010395]	chr17:34262362-34262303
145	A_51_P489413	Luc7l	66978	9.802	0.452	0.344	0.007	3.604	9.781	9.408	9.389	9.615	9.536	9.763	9.706	10.107	9.97	10.083	10.14	10.152	9.903	10.006	Mm.321828	Mus musculus Luc7 homolog (S. cerevisiae)-like (Luc7l), transcript variant 1, mRNA [NM_025881]	chr17:24463594-24463653
146	A_51_P186476	Slc11a1	18173	8.633	0.449	1	0.02	2.194	8.027	8.672	8.43	8.536	8.403	8.434	8.425	9.075	8.96	8.89	8.92	8.838	8.671	8.713	Mm.2913	Mus musculus solute carrier family 11 (proton-coupled divalent metal ion transporters), member 1 (Slc11a1), mRNA [NM_013612]	chr1:74625260-74625319
147	A_51_P159503	D11Ertd759e	629974	9.494	0.44	1	0.052	0.863	9.667	9.047	9.359	9.255	9.098	9.268	9.14	9.73	9.455	9.781	9.881	9.911	9.681	9.474	Mm.133342	Mus musculus DNA segment, Chr 11, ERATO Doi 759, expressed (D11Ertd759e), mRNA [NM_001040005]	chr11:119596336-119596395
148	A_51_P425284	Aldoc	11676	12.307	0.438	1	0.031	1.608	12.269	12.2	11.88	12.239	11.937	12.012	11.961	12.421	12.486	12.63	12.4	12.445	12.733	12.448	Mm.7729	Mus musculus adult male spinal cord cDNA, RIKEN full-length enriched library, clone:A330009L16 product:aldolase 3, C isoform, full insert sequence [AK039267]	chr11:78409262-78409321
149	A_51_P364600	Fyb	23880	8.466	0.432	1	0.036	1.341	8.239	8.278	8.347	8.416	8.259	8.414	8.297	8.834	8.58	8.643	8.917	9.003	8.835	8.464	Mm.170905	Mus musculus FYN binding protein (Fyb), mRNA [NM_011815]	chr15:6487702-6490196
150	A_51_P248629	Arhgap25	232201	9.233	0.431	1	0.041	1.178	9.452	8.989	8.893	9.108	8.928	8.881	8.746	9.296	9.288	9.488	9.562	9.621	9.475	9.282	Mm.119564	Mus musculus Rho GTPase activating protein 25 (Arhgap25), transcript variant 2, mRNA [NM_175476]	chr6:87534582-87534523
151	A_51_P142861	Casp1	12362	8.807	0.428	0.703	0.01	2.975	8.374	8.58	8.784	8.478	8.605	8.684	8.551	9.034	8.986	9.128	9.073	9.117	8.936	8.777	Mm.1051	Mus musculus caspase 1 (Casp1), mRNA [NM_009807]	chr9:5223467-5223969
152	A_51_P275496	BC026762	236428	7.787	0.426	1	0.076	0.444	7.335	7.632	7.771	7.422	7.611	7.538	7.703	7.753	8.417	8.122	8.016	8.035	7.85	7.803	Mm.383280	Mus musculus cDNA clone IMAGE:5065404 [BC029971]	chrUn_random:11525323-11525264
153	A_51_P109295	Pcdhb3	93874	9.246	0.422	0.389	0.007	3.496	8.871	8.994	9.276	9.049	9.039	9.132	9.053	9.529	9.436	9.661	9.465	9.387	9.391	9.496	Mm.82308	Mus musculus protocadherin beta 3 (Pcdhb3), mRNA [NM_053128]	chr18:37679911-37679970
154	A_52_P512201	5830484A20Rik	109032	8.571	0.413	1	0.097	0.155	8.73	8.29	8.421	8.433	8.194	8.409	8.23	8.826	8.602	8.899	9.006	9.041	8.682	8.54	Mm.335802	Mus musculus RIKEN cDNA 5830484A20 gene (5830484A20Rik), mRNA [NM_175397]	chr8_random:4195156-4195097
155	A_51_P386612	Pir	69656	9.714	0.409	1	0.043	1.118	9.457	9.455	9.323	9.651	9.342	9.757	9.59	9.821	9.765	10.105	9.931	10.143	9.743	9.932	Mm.293463	Mus musculus pirin (Pir), mRNA [NM_027153]	chrX:159143513-159143572
156	A_51_P191463		NA	9.735	0.408	1	0.028	1.693	9.737	9.623	9.397	9.516	9.341	9.493	9.604	9.962	10.271	9.903	9.986	9.882	9.787	9.775	Mm.329041	Mus musculus strain P/J MHC class Ib antigen (H2-M2) mRNA, complete cds. [AY302216]	chr17:35646258-35646078
157	A_51_P248666	Cd274	60533	8.641	0.405	1	0.072	0.501	8.345	8.21	8.628	8.579	8.393	8.411	8.338	8.733	8.772	8.837	9.149	8.919	8.922	8.409	Mm.245363	Mus musculus CD274 antigen (Cd274), mRNA [NM_021893]	chr19:29087711-29087770
158	A_52_P114494	Stat6	20852	8.527	0.401	1	0.054	0.815	8.139	8.302	8.509	8.567	8.21	8.607	8.268	8.614	8.738	8.963	8.845	8.94	8.739	8.572	Mm.121721	Mus musculus adult male liver tumor cDNA, RIKEN full-length enriched library, clone:C730038I05 product:signal transducer and activator of transcription 6, full insert sequence [AK149563]	chr10:127162021-127162080
159	A_51_P301804	St3gal1	20442	8.007	0.4	1	0.098	0.133	7.909	7.705	8.064	8.011	7.942	8.02	7.737	8.2	8.027	8.536	8.445	8.554	8.227	8.197	Mm.248334	Mus musculus ST3 beta-galactoside alpha-2,3-sialyltransferase 1 (St3gal1), mRNA [NM_009177]	chr15:67190070-67190011
160	A_51_P232824	Tmco4	77056	9.795	0.395	1	0.052	0.862	9.69	9.509	9.491	9.752	9.458	9.684	9.575	10.043	10.218	10.118	9.947	9.964	9.641	9.991	Mm.122336	Mus musculus transmembrane and coiled-coil domains 4 (Tmco4), mRNA [NM_029857]	chr4:138437438-138437497
161	A_51_P359603	Itgb7	16421	9.225	0.391	1	0.065	0.614	9	9.383	9.043	8.835	8.856	9.043	9.002	9.214	9.354	9.424	9.559	9.503	9.366	9.481	Mm.58	Mus musculus integrin beta 7 (Itgb7), mRNA [NM_013566]	chr15:102202235-102202176
162	A_51_P411225	Waspip	215280	10.036	0.388	1	0.087	0.3	10.045	9.77	9.615	9.868	9.661	10.17	9.969	10.379	10.023	10.382	10.216	10.361	10.266	10.191	Mm.223504	Mus musculus Wiskott-Aldrich syndrome protein interacting protein (Waspip), mRNA [NM_153138]	chr2:73274873-73274814
163	A_52_P507382	Unc93b1	54445	11.454	0.384	1	0.063	0.66	11.591	11.117	11.345	11.404	11.152	11.253	11.194	11.82	11.878	11.624	11.609	11.648	11.46	11.709	Mm.262094	Mus musculus unc-93 homolog B1 (C. elegans) (Unc93b1), mRNA [NM_019449]	chr19:3843887-3843946
164	A_51_P172853	Cd14	12475	9.344	0.367	0.41	0.007	3.45	9.074	9.246	9.198	9.213	9.215	9.381	9.293	9.706	9.591	9.57	9.61	9.64	9.537	9.534	Mm.3460	Mus musculus CD14 antigen (Cd14), mRNA [NM_009841]	chr18:37101575-37101516
165	A_51_P465350	Ly86	17084	11.876	0.342	1	0.063	0.647	11.778	11.571	11.862	11.691	11.697	11.61	11.647	11.886	12.047	12.154	12.138	12.183	11.973	11.864	Mm.2639	Mus musculus lymphocyte antigen 86 (Ly86), mRNA [NM_010745]	chr13:36840704-36840763
166	A_51_P270741	Syngr1	20972	11.46	0.336	1	0.098	0.114	11.485	11.318	11.072	11.396	11.136	11.372	11.295	11.64	11.678	11.781	11.532	11.588	11.53	11.673	Mm.230301	Mus musculus synaptogyrin 1 (Syngr1), transcript variant 1b, mRNA [NM_009303]	chr15:80197832-80197891
167	A_51_P494597	BC013712	230787	8.777	0.334	1	0.043	1.097	8.84	8.686	8.72	8.629	8.512	8.678	8.45	9.017	8.776	8.971	8.999	9.017	9.109	8.966	Mm.290912	Mus musculus adult male bone cDNA, RIKEN full-length enriched library, clone:9830006A17 product:similar to ICB-1 [Homo sapiens], full insert sequence [AK137465]	chr4:132160384-132160325
168	A_51_P416137	Slc31a2	20530	10.012	0.334	1	0.052	0.873	10.091	9.841	9.667	9.953	9.679	10.01	9.769	10.26	10.111	10.206	10.197	10.209	10.115	10.249	Mm.292539	Mus musculus solute carrier family 31, member 2 (Slc31a2), mRNA [NM_025286]	chr4:61731751-61731810
169	A_51_P509669	Uap1l1	227620	11.568	0.332	1	0.032	1.482	11.432	11.378	11.535	11.409	11.347	11.383	11.424	11.832	11.688	11.924	11.738	11.693	11.572	11.782	Mm.33797	Mus musculus UDP-N-acteylglucosamine pyrophosphorylase 1-like 1 (Uap1l1), mRNA [NM_001033293]	chr2:25369406-25369016
170	A_51_P459070	2010301N04Rik	72103	8.708	0.31	1	0.082	0.369	8.553	8.528	8.536	8.648	8.517	8.527	8.46	8.64	8.913	8.912	9.036	8.936	8.881	8.623	Mm.31770	Mus musculus RIKEN cDNA 2010301N04 gene (2010301N04Rik), mRNA [NM_024251]	chr6:87704966-87704907
171	A_51_P119429	Nckap1l	105855	9.827	0.284	1	0.095	0.184	9.788	9.684	9.769	9.691	9.787	9.735	9.607	10.015	10.201	9.867	10.02	10.036	9.831	10.077	Mm.30805	Mus musculus NCK associated protein 1 like (Nckap1l), mRNA [NM_153505]	chr15:103487487-103487546
172	A_51_P134835	Elavl2	15569	9.819	-0.319	1	0.1	0.096	9.853	9.936	10.07	10.001	9.996	10.038	10.251	9.796	9.539	9.701	9.763	9.726	9.809	9.582	Mm.318042	Mus musculus ELAV (embryonic lethal, abnormal vision, Drosophila)-like 2 (Hu antigen B) (Elavl2), transcript variant 1, mRNA [NM_207685]	chr4:90645392-90645333
173	A_51_P261428	Pdcd4	18569	10.642	-0.326	1	0.064	0.635	10.816	10.95	10.887	10.754	10.729	10.797	10.824	10.63	10.582	10.21	10.535	10.544	10.564	10.407	Mm.1605	Mus musculus programmed cell death 4 (Pdcd4), mRNA [NM_011050]	chr19:53839460-53840067
174	A_52_P124472	Kcnd2	16508	13.362	-0.331	1	0.054	0.83	13.598	13.409	13.667	13.585	13.757	13.521	13.463	13.188	13.285	13.134	13.159	13.085	13.381	13.451	Mm.320691	Mus musculus potassium voltage-gated channel, Shal-related family, member 2 (Kcnd2), mRNA [NM_019697]	chr6:21665679-21665738
175	A_51_P475523	Brca1	12189	7.938	-0.343	1	0.07	0.536	8.27	8.237	8.113	8.102	8.243	7.993	7.987	7.945	7.674	7.695	7.669	7.815	7.767	7.981	Mm.244975	Mus musculus breast cancer 1 (Brca1), mRNA [NM_009764]	chr11:101598193-101598134
176	A_51_P175018	Apcdd1	494504	12.398	-0.364	1	0.048	0.983	12.537	12.471	12.728	12.741	12.675	12.782	12.583	12.331	12.09	12.533	12.377	12.212	12.183	12.238	Mm.391102	Mus musculus activated spleen cDNA, RIKEN full-length enriched library, clone:F830213N15 product:Ethanol induced gene product, full insert sequence. [AK157407]	chr18:63343087-63343146
177	A_52_P390944	Chst3	53374	9.155	-0.407	1	0.032	1.518	9.229	9.203	9.618	9.406	9.459	9.315	9.302	9.103	8.892	9.101	8.748	8.787	8.905	9.151	Mm.12866	Mus musculus carbohydrate (chondroitin 6/keratan) sulfotransferase 3 (Chst3), mRNA [NM_016803]	chr10:59700012-59699953
178	A_52_P568235	Fstl5	213262	12.052	-0.413	1	0.032	1.528	12.167	12.228	12.361	12.162	12.134	12.329	12.363	11.978	11.793	11.845	11.951	12.025	11.809	11.454	Mm.379337	Mus musculus follistatin-like 5 (Fstl5), mRNA [NM_178673]	chr3:76815375-76815434
179	A_51_P516125		NA	11.492	-0.448	1	0.095	0.192	11.999	11.288	11.936	11.867	11.782	11.787	11.632	11.322	11.279	11.514	11.47	11.377	11.231	10.962		Mus musculus cDNA clone IMAGE:3492058, partial cds. [BC013561]	chr1:172243468-172243409
180	A_51_P170463	Gpr17	574402	13.885	-0.455	1	0.048	0.96	14.139	14.373	14.093	14.385	13.874	13.957	14.012	14.024	13.449	13.636	13.63	13.523	13.903	13.483	Mm.391108	Mus musculus G protein-coupled receptor 17 (Gpr17), mRNA [NM_001025381]	chr18:32335233-32335174
181	A_51_P482128	Krt15	16665	8.458	-0.541	1	0.016	2.496	8.976	8.925	8.744	8.571	8.431	8.394	8.71	7.945	8.03	8.331	8.125	8.144	8.323	8.063	Mm.4646	Mus musculus keratin complex 1, acidic, gene 15 (Krt1-15), mRNA [NM_008469]	chr11:100241124-100241065

## Sheet: E. BALB cerebellum DEGs
BioConductor Gene Listing
Cereb.AgdVsCereb.Yng: FDR < 0.05 & abs FC >= 3
									Cereb.AgdVsCereb.Yng
No	ID	ShortName	LongName	GenomicCoord.ENS	GeneID.ENS	RefSeq.ENS	Cereb.Agd.aveA	Cereb.Yng.aveA	M	Fold	AdjP	FDR	B
1	A_51_P198335	Gabra6	gamma-aminobutyric acid (GABA-A) receptor, subunit alpha 6	chr11:42119942-42134553	14399	NM_008068	15.091	6.629	8.462	352.518	0.5701	0.00106	3.167
2	A_51_P150302	Crtam	cytotoxic and regulatory T cell molecule	chr9:40780881-40812669	54698	NM_019465	15.529	7.612	7.918	241.837	0.01109	0.00027	6.887
3	A_51_P448677	Pcp2	Purkinje cell protein 2 (L7)	chr8:3623377-3625532	18545	NM_008790	17.129	9.889	7.24	151.212	0.23443	0.00067	4.01
4	A_51_P465449	Mybpc3	myosin binding protein C, cardiac	chr2:90958301-90976673	17868		14.672	7.864	6.808	112.076	0.29141	0.00076	3.803
5	A_52_P643832	Pcp2	Purkinje cell protein 2 (L7)	chr8:3623377-3625532	18545	NM_008790	17.1	10.606	6.494	90.136	0.07456	0.00043	5.093
6	A_51_P326826	AK090125					12.338	6.09	6.247	75.975	0.34386	0.0008	3.646
7	A_52_P355124	Gsbs	G substrate	chr6:55967491-55982679	19051	NM_011153	13.819	7.61	6.209	73.99	0.17362	0.0006	4.294
8	A_52_P301935	Il20rb	interleukin 20 receptor beta	chr9:100358138-100386892	213208	NM_001033543	13.07	6.93	6.14	70.503	0.00272	0.00018	8.202
9	A_51_P273888	Cbln3	cerebellin 3 precursor protein	chr14:56497757-56503093	56410	NM_019820	11.542	5.511	6.031	65.381	0.16659	0.00059	4.333
10	A_51_P257457	Ltbp2	latent transforming growth factor beta binding protein 2	chr12:86124163-86217482	16997		12.765	6.74	6.025	65.124	0.00379	0.00018	7.891
11	A_52_P246189	Cbln3	cerebellin 3 precursor protein	chr14:56497757-56503093	56410	NM_019820	11.512	5.542	5.97	62.665	0.0748	0.00043	5.09
12	A_52_P625118	Car8	carbonic anhydrase 8	chr4:8068640-8166188	12319, 676792	NM_007592	15.09	9.249	5.842	57.342	0.17443	0.0006	4.29
13	A_51_P318430	Gsbs	G substrate	chr6:55967491-55982679	19051	NM_011153	12.526	6.688	5.838	57.215	0.06504	0.00042	5.222
14	A_51_P483241	AI853839*	expressed sequence AI853839				12.741	7.217	5.524	46.011	0.54346	0.00104	3.212
15	A_51_P506915	Pkp3	plakophilin 3	chr7:148264223-148276408	56460	NM_019762	11.755	6.658	5.097	34.223	0.04908	0.00039	5.488
16	A_52_P510821	Cnpy1	canopy 1 homolog (zebrafish)	chr5:28529106-28536562| 5:28528989-28572328	269637		12.033	7.014	5.019	32.424	0.79092	0.00124	2.855
17	A_52_P177054	Il22 (Il22, Iltifb)	interleukin 22	chr10:117641998-117647098	116849, 50929	NM_016971	12.602	7.741	4.86	29.049	0.01258	0.00029	6.768
18	A_52_P408391	Neurod1 (Neurod5, Neurod1)	neurogenic differentiation 1	chr2:79292798-79296793	18012	NM_010894	13.344	8.5	4.844	28.716	0.09731	0.00047	4.842
19	A_51_P340003	Sycp1	synaptonemal complex protein 1	chr3:102622573-102740007	20957	NM_011516	10.425	5.638	4.787	27.604	0.07213	0.00043	5.125
20	A_51_P392005	Car8	carbonic anhydrase 8	chr4:8068640-8166188	12319, 676792	NM_007592	10.922	6.178	4.744	26.798	0.04946	0.00039	5.481
21	A_51_P232628	Il22 (Il22, Iltifb)	interleukin 22	chr10:117641998-117647098	116849, 50929	NM_016971	11.633	6.891	4.742	26.759	0.00625	0.00023	7.424
22	A_51_P242643	Lbxcor1	ladybird homeobox 1 homolog (Drosophila) corepressor 1	chr9:62985977-62996768			13.21	8.581	4.629	24.739	0.0089	0.00024	7.093
23	A_51_P185247	Gdf10	growth differentiation factor 10	chr14:34736783-34749700	14560	NM_145741	13.172	8.619	4.553	23.478	0.05299	0.0004	5.416
24	A_51_P187625	Cabp2	calcium binding protein 2	chr19:4083490-4087337	29866	NM_013878	10.831	6.284	4.547	23.384	0.4612	0.00094	3.368
25	A_51_P487404	8030451F13Rik (Mybpc1)	RIKEN cDNA 8030451F13 gene	chr10:87981024-88067897	109272		10.878	6.48	4.397	21.073	0.05161	0.00039	5.441
26	A_51_P124222	Aqp6*	aquaporin 6				12.311	7.94	4.371	20.692	0.03534	0.00038	5.798
27	A_51_P419246	5830416P10Rik	RIKEN cDNA 5830416P10 gene	chr19:53526131-53528626	381232		10.915	6.605	4.31	19.837	0.01804	0.00032	6.43
28	A_52_P558502	Il16*	interleukin 16				10.682	6.375	4.307	19.798	0.07008	0.00043	5.152
29	A_52_P555664	B3gnt5	UDP-GlcNAc:betaGal beta-1,3-N-acetylglucosaminyltransferase 5	chr16:19760301-19772393	108105	NM_054052	9.779	5.679	4.1	17.148	0.20229	0.00063	4.149
30	A_51_P309988	Gprc5c	G protein-coupled receptor, family C, group 5, member C	chr11:114713156-114733931	70355, 100044349	NM_147217	12.475	8.384	4.091	17.047	0.27739	0.00073	3.85
31	A_52_P452747	Dao1	D-amino acid oxidase 1	chr5:114453835-114475469	13142	NM_010018	11.193	7.136	4.057	16.647	0.21115	0.00064	4.109
32	A_51_P501018	Nek2	NIMA (never in mitosis gene a)-related expressed kinase 2	chr1:193645377-193656927	18005	NM_010892	10.573	6.516	4.057	16.646	0.31901	0.00078	3.718
33	A_51_P467349	Trim62*	tripartite motif-containing 62				9.755	5.741	4.014	16.151	0.00172	0.00018	8.63
34	A_51_P372702	Il16	interleukin 16	chr7:90791574-90884033	16170	NM_010551	12.756	8.784	3.971	15.687	0.02149	0.00034	6.266
35	A_51_P165135	Bclp2	chitinase like protein 2	chr3:105819883-105835732	229687	NM_001080816	9.731	5.767	3.964	15.608	0.00388	0.00018	7.87
36	A_51_P462428	Galntl2	UDP-N-acetyl-alpha-D-galactosamine:polypeptide N-acetylgalactosaminyltransferase-like 2	chr14:32842175-32875383	78754	NM_030166	12.921	8.973	3.948	15.428	0.00038	0.00011	10.02
37	A_51_P465331	Fgf7	fibroblast growth factor 7	chr2:125860520-125916257	14178	NM_008008	11.112	7.271	3.842	14.336	0.02191	0.00034	6.248
38	A_52_P647102	Svep1*	sushi, von Willebrand factor type A, EGF and pentraxin domain containing 1				9.203	5.367	3.836	14.282	0.03547	0.00038	5.794
39	A_51_P199352	2310015B20Rik	RIKEN cDNA 2310015B20 gene	chr10:69667432-69682458	69563		11.642	7.914	3.728	13.254	0.05184	0.00039	5.437
40	A_51_P206203	Mrgprf*	MAS-related GPR, member F				12.437	8.785	3.652	12.574	0.29824	0.00076	3.781
41	A_51_P332309	Eomes	eomesodermin homolog (Xenopus laevis)	chr9:118387330-118395249	13813	NM_010136	9.343	5.698	3.645	12.512	0.45526	0.00093	3.38
42	A_51_P345316	Cep76	centrosomal protein 76	chr18:67777051-67800990	225659	NM_001081073	12.102	8.483	3.618	12.281	0.06261	0.00041	5.258
43	A_51_P461005	Nrk	Nik related kinase	chrX:135448970-135545071	27206	NM_013724	8.686	5.069	3.616	12.264	0.0254	0.00036	6.109
44	A_51_P394814	Svep1	sushi, von Willebrand factor type A, EGF and pentraxin domain containing 1	chr4:58055668-58219468	64817	NM_022814	11.099	7.494	3.605	12.167	0.11706	0.00051	4.667
45	A_52_P375312	Amica1	adhesion molecule, interacts with CXADR antigen 1	chr9:44915259-44943689| 9:44887266-44915934	270152	NM_001005421	11.994	8.406	3.588	12.023	0.00085	0.00014	9.279
46	A_51_P397876	En2	engrailed 2	chr5:28492236-28498706	13799	NM_010134	14.253	10.677	3.576	11.928	1	0.00247	1.691
47	A_51_P409010	Comp	cartilage oligomeric matrix protein	chr8:72897457-72905964	12845	NM_016685	12.444	8.918	3.527	11.525	0.00193	0.00018	8.519
48	A_51_P468249	Phex	phosphate regulating gene with homologies to endopeptidases on the X chromosome (hypophosphatemia, vitamin D resistant rickets)	chrX:153596618-153853218	18675	NM_011077	10.162	6.655	3.507	11.369	1	0.00175	2.244
49	A_51_P481930	Cdh15	cadherin 15	chr8:125371866-125391297	12555	NM_007662	13.35	9.885	3.465	11.041	1	0.00588	0.291
50	A_52_P302587	Chn2*	chimerin (chimaerin) 2				14.711	11.248	3.463	11.031	0.90857	0.00135	2.724
51	A_51_P388847	AW049765 (Stap2)	expressed sequence AW049765	chr17:56136504-56144993	106766	NM_145934	11.977	8.539	3.438	10.837	0.12869	0.00052	4.578
52	A_52_P303491	Grid2*	glutamate receptor, ionotropic, delta 2				13.721	10.311	3.409	10.626	0.02927	0.00038	5.975
53	A_52_P462180	AK042740					8.268	4.862	3.406	10.6	0.15336	0.00056	4.411
54	A_52_P368690	NAP019557-001					10.056	6.665	3.391	10.492	0.00018	0.00011	10.7
55	A_52_P454531	Cbln1	cerebellin 1 precursor protein	chr8:89992760-89996491	12404, 100046314	NM_019626	11.742	8.379	3.363	10.289	0.30241	0.00077	3.768
56	A_52_P374960	Ostn	osteocrin	chr16:27307727-27351294	239790	NM_198112	8.597	5.261	3.336	10.099	0.00956	0.00025	7.026
57	A_52_P424970	Itgal	integrin alpha L	chr7:134439774-134478651	16408		9.638	6.333	3.305	9.884	0.15976	0.00057	4.373
58	A_51_P241863	Slc5a1	solute carrier family 5 (sodium/glucose cotransporter), member 1	chr5:33446883-33505346	20537	NM_019810	8.361	5.088	3.274	9.673	0.06296	0.00041	5.253
59	A_51_P350294	Slc9a3*	solute carrier family 9 (sodium/hydrogen exchanger), member 3				9.126	5.881	3.245	9.482	0.02945	0.00038	5.97
60	A_52_P802796	AK047643					11.892	8.655	3.237	9.427	0.4376	0.0009	3.417
61	A_51_P507307	Chd7	chromodomain helicase DNA binding protein 7	chr4:8618068-8794806	320790	NM_001081417	10.263	7.044	3.218	9.307	0.00812	0.00024	7.18
62	A_52_P191278	Camk4*	calcium/calmodulin-dependent protein kinase IV				11.426	8.236	3.19	9.123	0.11992	0.00051	4.644
63	A_51_P466613	Homer3	homer homolog 3 (Drosophila)	chr8:72806949-72818249	26558	NM_011984	11.935	8.758	3.177	9.047	0.10801	0.00049	4.743
64	A_51_P307721	Cbln1	cerebellin 1 precursor protein	chr8:89992760-89996491	12404, 100046314	NM_019626	16.534	13.382	3.152	8.886	0.27159	0.00073	3.87
65	A_51_P413005	Chn2	chimerin (chimaerin) 2	chr6:53990033-54250715	69993	NM_023543	14.553	11.421	3.132	8.765	0.02591	0.00037	6.09
66	A_52_P267736	C530024P05Rik (Wscd2)	RIKEN cDNA C530024P05 gene	chr5:113919467-114039679	320916	NM_177292	12.02	8.889	3.131	8.759	1	0.00393	0.927
67	A_52_P557249	3110001A13Rik	RIKEN cDNA 3110001A13 gene	chr2:3621285-3699414	66540	NM_025626	13.955	10.844	3.111	8.638	0.17628	0.00061	4.28
68	A_52_P491933	Pkib*	protein kinase inhibitor beta, cAMP dependent, testis specific				9.892	6.784	3.109	8.626	0.22117	0.00066	4.065
69	A_51_P388661	Msx2	homeo box, msh-like 2	chr13:53562250-53568149	17702, 100046255	NM_013601	9.205	6.097	3.108	8.622	0.34098	0.00079	3.654
70	A_51_P135268	Corin	corin	chr5:72691265-72895447	53419	NM_016869	8.659	5.562	3.097	8.555	0.01753	0.00032	6.457
71	A_52_P175821	Chd7	chromodomain helicase DNA binding protein 7	chr4:8618068-8794806	320790	NM_001081417	9.329	6.258	3.071	8.404	0.00384	0.00018	7.879
72	A_52_P1093579	TC1681528					9.286	6.232	3.053	8.302	0.2695	0.00073	3.878
73	A_52_P684087	Atoh7*	atonal homolog 7 (Drosophila)				12.328	9.314	3.014	8.078	0.00465	0.00019	7.7
74	A_51_P520699	LOC435145*	similar to transmembrane protein 46				11.364	8.361	3.003	8.018	0.67734	0.00115	3.003
75	A_51_P139392	9330159N05Rik*	RIKEN cDNA 9330159N05 gene				10.697	7.703	2.994	7.968	0.54072	0.00104	3.217
76	A_51_P211403	Gcgr*	glucagon receptor				10.205	7.223	2.983	7.904	0.08693	0.00046	4.949
77	A_52_P652336	Lhx1	LIM homeobox protein 1	chr11:84331477-84339037	16869	NM_008498	12.009	9.04	2.969	7.831	0.18676	0.00062	4.225
78	A_52_P378493	1700021K02Rik	RIKEN cDNA 1700021K02 gene	chr10:60634702-60651589	65971	NM_001017433, NM_001017441	9.305	6.375	2.93	7.621	0.3734	0.00084	3.568
79	A_51_P521084	3110001A13Rik	RIKEN cDNA 3110001A13 gene	chr2:3621285-3699414	66540	NM_025626	9.976	7.048	2.928	7.611	0.09682	0.00047	4.847
80	A_51_P437628	Uncx4.1*	Unc4.1 homeobox (C. elegans)				10.117	7.201	2.916	7.547	0.2297	0.00067	4.029
81	A_52_P403333	Svep1*	sushi, von Willebrand factor type A, EGF and pentraxin domain containing 1				7.746	4.857	2.89	7.41	0.10316	0.00049	4.787
82	A_52_P465064	AK089839					8.206	5.327	2.879	7.356	0.18965	0.00062	4.21
83	A_52_P645615	AK140063					11.096	8.229	2.867	7.293	0.24046	0.00069	3.986
84	A_51_P355906	Kit	kit oncogene	chr5:75971041-76052744	16590		12.959	10.118	2.841	7.163	0.72374	0.00119	2.94
85	A_52_P387717	Cep76	centrosomal protein 76	chr18:67777051-67800990	225659	NM_001081073	8.864	6.027	2.837	7.146	0.22737	0.00066	4.039
86	A_52_P514488	Exoc3l	exocyst complex component 3-like	chr8:107813824-107819998	277978	NM_177788	10.333	7.519	2.814	7.034	0.26639	0.00072	3.889
87	A_51_P381178	Btbd4*	BTB (POZ) domain containing 4				11.178	8.368	2.81	7.014	0.85545	0.00131	2.781
88	A_51_P452119	Lhx1	LIM homeobox protein 1	chr11:84331477-84339037	16869	NM_008498	12.813	10.004	2.81	7.011	0.36081	0.00082	3.601
89	A_51_P283016	Slc1a6	solute carrier family 1 (high affinity aspartate/glutamate transporter), member 6	chr10:78243247-78277510	20513	NM_009200	16.286	13.489	2.797	6.948	0.04265	0.00039	5.621
90	A_52_P319326	Svep1	sushi, von Willebrand factor type A, EGF and pentraxin domain containing 1	chr4:58055668-58219468	64817	NM_022814	9.084	6.326	2.758	6.763	0.33341	0.00079	3.676
91	A_52_P84315	Chd7	chromodomain helicase DNA binding protein 7	chr4:8618068-8794806	320790	NM_001081417	14.887	12.137	2.75	6.729	0.09177	0.00047	4.897
92	A_52_P239511	Pde1c*	phosphodiesterase 1C				9.715	6.969	2.746	6.708	0.87056	0.00132	2.764
93	A_52_P507745	Cadps2	Ca2+-dependent activator protein for secretion 2	chr6:23212773-23789420	320405	NM_153163	9.237	6.493	2.744	6.699	0.19688	0.00063	4.175
94	A_52_P698715	1500016L03Rik*	RIKEN cDNA 1500016L03 gene				14.876	12.143	2.733	6.648	0.2237	0.00066	4.054
95	A_52_P668514	Ankrd25 (Kank2)	ankyrin repeat domain 25	chr9:21571233-21602979	235041	NM_145611	13.568	10.837	2.73	6.636	0.08733	0.00046	4.944
96	A_52_P118756	Itpr1	inositol 1,4,5-triphosphate receptor 1	chr6:108163112-108501103	16438		16.731	14.003	2.728	6.624	0.50931	0.001	3.274
97	A_52_P722931	AK042659					10.803	8.077	2.726	6.615	0.65794	0.00114	3.03
98	A_52_P42175	Slc6a5	solute carrier family 6 (neurotransmitter transporter, glycine), member 5	chr7:57166139-57219226	677366, 104245	NM_148931	10.374	7.649	2.725	6.612	1	0.02651	-1.828
99	A_52_P108243	Pde1c	phosphodiesterase 1C	chr6:56022200-56312305	18575	NM_011054	9.716	7.001	2.715	6.566	0.88218	0.00133	2.752
100	A_51_P335801	Calb1	calbindin-28K	chr4:15808411-15835211	12307	NM_009788	16.714	14.037	2.677	6.393	0.02369	0.00034	6.174
101	A_51_P325318	Serinc2	serine incorporator 2	chr4:129930739-129956449	230779, 100044221		11.837	9.164	2.673	6.376	0.20238	0.00063	4.149
102	A_52_P515857	Reln*	reelin				8.18	5.519	2.662	6.328	0.33213	0.00079	3.679
103	A_52_P669128	Slc5a1	solute carrier family 5 (sodium/glucose cotransporter), member 1	chr5:33446883-33505346	20537	NM_019810	8.048	5.397	2.651	6.281	1	0.00484	0.596
104	A_51_P269663	Itpr1	inositol 1,4,5-triphosphate receptor 1	chr6:108163112-108501103	16438		17.176	14.525	2.651	6.281	0.04281	0.00039	5.617
105	A_52_P195881	Kcng4	potassium voltage-gated channel, subfamily G, member 4	chr8:122147754-122159580	66733	NM_025734	10.772	8.133	2.639	6.229	0.139	0.00053	4.504
106	A_51_P283968	Adamts18	a disintegrin-like and metallopeptidase (reprolysin type) with thrombospondin type 1 motif, 18	chr8:116221026-116372515	208936	NM_172466	9.228	6.615	2.612	6.115	1	0.00382	0.97
107	A_51_P498388	Sbk1	SH3-binding kinase 1	chr7:133416133-133438505	104175	NM_145587	14.027	11.415	2.611	6.111	1	0.00195	2.065
108	A_52_P452667	Prom2	prominin 2	chr2:127352209-127367133	192212	NM_138750	9.572	6.982	2.59	6.019	0.03343	0.00038	5.85
109	A_51_P456208	Tff3	trefoil factor 3, intestinal	chr17:31262260-31266556	21786	NM_011575	8.126	5.537	2.589	6.017	1	0.00247	1.693
110	A_51_P308279	St18	suppression of tumorigenicity 18	chr1:6720132-6851021	240690		13.3	10.714	2.586	6.004	0.0783	0.00044	5.047
111	A_52_P971150	2210008N01Rik*	RIKEN cDNA 2210008N01 gene				10.425	7.843	2.582	5.989	1	0.0015	2.548
112	A_51_P133618	Clcn1*	chloride channel 1				10.82	8.243	2.577	5.966	0.02271	0.00034	6.214
113	A_51_P483324	Ptpn22	protein tyrosine phosphatase, non-receptor type 22 (lymphoid)	chr3:103664215-103716169	19260	NM_008979	9.338	6.765	2.574	5.954	0.1946	0.00063	4.186
114	A_51_P368823	Grb7	growth factor receptor bound protein 7	chr11:98308148-98316684	14786	NM_010346	12.526	9.956	2.57	5.939	0.10906	0.00049	4.734
115	A_51_P282930	Rorc	RAR-related orphan receptor gamma	chr3:94176708-94202510	19885	NM_011281	11.649	9.128	2.521	5.739	0.11483	0.0005	4.685
116	A_51_P221677	Trim62	tripartite motif-containing 62	chr4:128561384-128588570	67525	NM_178110	13.183	10.665	2.518	5.728	1	0.00147	2.582
117	A_52_P405460	Gprc5c	G protein-coupled receptor, family C, group 5, member C	chr11:114732276-114733911| 11:114713156-114733931	70355, 100044349	NM_147217	9.24	6.735	2.505	5.675	0.03936	0.00038	5.696
118	A_51_P451428	Marveld2	MARVEL (membrane-associating) domain containing 2	chr13:101365914-101386903	218518	NM_001038602	10.812	8.311	2.501	5.662	0.05426	0.0004	5.393
119	A_51_P500156	Pvalb	parvalbumin	chr15:78021547-78036830	19293		14.799	12.31	2.489	5.613	0.00304	0.00018	8.099
120	A_51_P130115	Spink2	serine peptidase inhibitor, Kazal type 2	chr5:77634132-77640478	69982	NM_183284	7.84	5.356	2.484	5.595	0.00076	0.00014	9.385
121	A_51_P204080	Hk2	hexokinase 2	chr6:82675041-82724453	15277	NM_013820	11.31	8.826	2.483	5.591	0.28371	0.00074	3.829
122	A_52_P141417	Dact1	dapper homolog 1, antagonist of beta-catenin (xenopus)	chr12:72410971-72421077	59036	NM_021532	9.626	7.147	2.479	5.573	0.00212	0.00018	8.435
123	A_52_P66524	Ccdc63	coiled-coil domain containing 63	chr5:122558065-122588071	330188	NM_183307	7.852	5.374	2.477	5.569	0.00467	0.00019	7.697
124	A_51_P489935	Pax6	paired box gene 6	chr2:105509053-105537518	18508	NM_013627	12.269	9.796	2.474	5.554	0.18237	0.00061	4.248
125	A_51_P212012	8430419K02Rik*	RIKEN cDNA 8430419K02 gene				8.225	5.756	2.469	5.536	0.31154	0.00078	3.74
126	A_52_P762966	AK035834					11.752	9.3	2.453	5.474	1	0.00757	-0.072
127	A_52_P484925	EG329070	predicted gene, EG329070	chr19:47336657-47339548			9.223	6.771	2.451	5.47	0.16886	0.0006	4.321
128	A_52_P565559	Pax6	paired box gene 6	chr2:105509053-105537518	18508	NM_013627	10.651	8.211	2.44	5.426	0.04509	0.00039	5.568
129	A_52_P173442	4933413A10Rik (Wscd2)	RIKEN cDNA 4933413A10 gene	chr5:113919467-114039679	320916	NM_177292	15.971	13.533	2.438	5.42	0.32502	0.00079	3.7
130	A_52_P289231	S57425					11.862	9.427	2.435	5.407	0.04846	0.00039	5.5
131	A_52_P319495	Boc	biregional cell adhesion molecule-related/down-regulated by oncogenes (Cdon) binding protein	chr16:44485158-44559010	117606	NM_172506	11.648	9.216	2.432	5.397	1	0.00164	2.383
132	A_52_P239346	Pld5*	phospholipase D family, member 5				9.048	6.621	2.427	5.376	1	0.02517	-1.763
133	A_52_P1059369	1700037N05Rik*	RIKEN cDNA 1700037N05 gene				9.725	7.299	2.426	5.376	1	0.01222	-0.769
134	A_52_P394291	1190002N15Rik	RIKEN cDNA 1190002N15 gene	chr9:94418283-94438500	68861, 100044725	NM_001033145	12.721	10.294	2.426	5.375	0.63376	0.00112	3.066
135	A_51_P185897	AK039250					13.867	11.443	2.424	5.366	0.57073	0.00106	3.166
136	A_51_P119771	Il17re	interleukin 17 receptor E	chr6:113408478-113420745	57890	NM_145826, NM_001034029, NM_001034031	11.175	8.758	2.418	5.344	0.19921	0.00063	4.164
137	A_52_P349380	AK047300					7.797	5.383	2.415	5.331	1	0.00187	2.138
138	A_52_P789489	(Wiz)	widely-interspaced zinc finger motifs Gene [Source:MGI Symbol;Acc:MGI:1332638]	chr17:32491011-32526361	22404	NM_011717, NM_212438	12.275	9.866	2.409	5.312	0.02982	0.00038	5.958
139	A_51_P483159	Gchfr	GTP cyclohydrolase I feedback regulator	chr2:118993541-118998115	320415	NM_177157	13.503	11.099	2.404	5.293	1	0.00839	-0.225
140	A_51_P365369	Reln	reelin	chr5:21390272-21850523			14.199	11.802	2.397	5.269	1	0.00197	2.043
141	A_51_P214197	Stk17b	serine/threonine kinase 17b (apoptosis-inducing)	chr1:53812358-53841998	98267	NM_133810	12.103	9.709	2.394	5.257	0.39005	0.00085	3.527
142	A_52_P1028683	C230047L17Rik*	RIKEN cDNA C230047L17 gene				9.795	7.409	2.387	5.229	0.55239	0.00104	3.197
143	A_52_P330359	Agbl2	ATP/GTP binding protein-like 2	chr2:90622884-90674576	271813		9.068	6.683	2.385	5.222	0.59006	0.00108	3.134
144	A_51_P144364	Chn2	chimerin (chimaerin) 2	chr6:53990033-54250715	69993	NM_023543	7.932	5.55	2.382	5.212	1	0.00171	2.298
145	A_51_P434483	Hpn	hepsin	chr7:31883750-31900303	15451		11.231	8.849	2.382	5.212	0.20371	0.00064	4.143
146	A_52_P996664	AK080560					9.769	7.388	2.38	5.206	1	0.00372	1.023
147	A_52_P303161	Tuba8	tubulin, alpha 8	chr6:121160816-121176872	53857	NM_017379	11.935	9.555	2.38	5.206	1	0.00144	2.619
148	A_52_P8324	Tmem178	transmembrane protein 178	chr17:81343972-81401156	68027	NM_026516	14.489	12.114	2.375	5.189	0.95286	0.00139	2.678
149	A_51_P331288	Akr1b7	aldo-keto reductase family 1, member B7	chr6:34362334-34373137	11997	NM_009731	8.117	5.742	2.375	5.188	0.03705	0.00038	5.753
150	A_52_P391110	Ryr1	ryanodine receptor 1, skeletal muscle	chr7:29788363-29910170	20190	NM_009109	10.645	8.271	2.374	5.183	1	0.00183	2.175
151	A_52_P130907	Exph5	exophilin 5	chr9:53109775-53185619	320051	NM_176846	7.671	5.298	2.373	5.181	0.00696	0.00023	7.323
152	A_51_P447545	Igfbp1	insulin-like growth factor binding protein 1	chr11:7097782-7102536	16006	NM_008341	8.245	5.877	2.369	5.164	0.40181	0.00086	3.498
153	A_51_P216268	2610001A08Rik*	RIKEN cDNA 2610001A08 gene				9.241	6.882	2.358	5.127	1	0.00201	2.001
154	A_51_P174696	Casq2	calsequestrin 2	chr3:101890465-101950433	12373		11.58	9.225	2.355	5.115	0.29761	0.00076	3.783
155	A_51_P380587	Cep72	centrosomal protein 72	chr13:74173943-74199725	74470	NM_028959	10.65	8.307	2.343	5.074	1	0.00163	2.401
156	A_51_P179041	Tead4	TEA domain family member 4	chr6:128177161-128250831	21679	NM_011567, NM_001080979	8.395	6.052	2.343	5.072	0.04669	0.00039	5.535
157	A_52_P84814	Prl2c3 (OTTMUSG00000000651)	prolactin family 2, subfamily c, member 3	chr13:27941271-27949663			7.344	5.013	2.331	5.031	0.12954	0.00052	4.571
158	A_52_P727235	RP23-309K20.1*	similar to C05G5.5				9.518	7.187	2.331	5.031	1	0.00172	2.266
159	A_51_P446825	6430573F11Rik	RIKEN cDNA 6430573F11 gene	chr8:37521211-37577374	319582	NM_176952	13.771	11.443	2.328	5.023	0.62334	0.00111	3.082
160	A_52_P670612	Meis1	myeloid ecotropic viral integration site 1	chr11:18780674-18918964	17268	NM_010789	9.454	7.134	2.32	4.993	1	0.00429	0.788
161	A_51_P377557	D11Ertd636e (Cpsf4l)	DNA segment, Chr 11, ERATO Doi 636, expressed	chr11:113559486-113571331	52670	NM_029794, NM_026682	9.44	7.132	2.308	4.953	1	0.0045	0.713
162	A_52_P628445	Ptprr	protein tyrosine phosphatase, receptor type, R	chr10:115455455-115711985	19279	NM_011217	12.596	10.292	2.304	4.937	0.01638	0.00032	6.521
163	A_52_P94516	Camk4	calcium/calmodulin-dependent protein kinase IV	chr18:33098521-33346580	12326	NM_009793	13.062	10.762	2.3	4.926	1	0.00143	2.627
164	A_52_P574274	Spatc1	spermatogenesis and centriole associated 1	chr15:76098519-76123002	74281	NM_028852	8.914	6.618	2.297	4.913	1	0.01644	-1.188
165	A_52_P1155674	AK040092					10.242	7.951	2.292	4.896	1	0.00505	0.523
166	A_52_P561416	6430573F11Rik	RIKEN cDNA 6430573F11 gene	chr8:37521211-37577374	319582	NM_176952	12.724	10.433	2.292	4.896	1	0.00266	1.554
167	A_52_P779071	AK047112					10.103	7.816	2.287	4.88	1	0.00677	0.082
168	A_51_P443976	Ptprr	protein tyrosine phosphatase, receptor type, R	chr10:115455455-115711985	19279	NM_011217	13.526	11.242	2.283	4.868	0.06213	0.00041	5.266
169	A_51_P364592	Zic2	Zic finger protein of the cerebellum 2	chr14:122874606-122879550	22772	NM_009574	10.265	8.001	2.264	4.804	0.06688	0.00042	5.196
170	A_51_P342446	Gas7	growth arrest specific 7	chr11:67268939-67498476	14457		9.773	7.517	2.256	4.777	0.9573	0.00139	2.674
171	A_52_P437839	AK043453					9.16	6.906	2.255	4.773	1	0.01122	-0.651
172	A_52_P220739	9630041I06Rik*	RIKEN cDNA 9630041I06 gene				8.055	5.802	2.253	4.765	0.1325	0.00052	4.55
173	A_51_P358825	Nlrp10	NLR family, pyrin domain containing 10	chr7:116065374-116073672	244202	NM_175532	8.724	6.473	2.251	4.759	0.0384	0.00038	5.72
174	A_52_P173485	Usp3	ubiquitin specific peptidase 3	chr9:66365688-66440896	235441	NM_144937	11.302	9.054	2.247	4.748	0.00228	0.00018	8.366
175	A_51_P419439	Gnmt	glycine N-methyltransferase	chr17:46862615-46866114	14711	NM_010321	11.665	9.419	2.246	4.743	0.00041	0.00011	9.967
176	A_51_P213266	Bmp8a	bone morphogenetic protein 8a	chr4:122989896-123020156	12163	NM_007558	8.539	6.298	2.241	4.726	0.00266	0.00018	8.223
177	A_52_P236937	Pde1c*	phosphodiesterase 1C				8.35	6.112	2.238	4.719	0.33712	0.00079	3.665
178	A_52_P668442	Megf11	multiple EGF-like-domains 11	chr9:64233433-64557012	214058	NM_172522	11.722	9.485	2.237	4.713	0.84871	0.0013	2.788
179	A_52_P370727	Galnt13*	UDP-N-acetyl-alpha-D-galactosamine:polypeptide N-acetylgalactosaminyltransferase 13				10.607	8.371	2.236	4.711	1	0.00527	0.462
180	A_51_P184724	Cnksr3	Cnksr family member 3	chr10:3134304-3227479	215748	NM_172546	12.848	10.613	2.235	4.709	0.09445	0.00047	4.87
181	A_52_P262209	Atp2a3	ATPase, Ca++ transporting, ubiquitous	chr11:72774671-72806546	53313	NM_016745	11.41	9.176	2.234	4.706	0.69527	0.00116	2.978
182	A_51_P503883	Plekhg4	pleckstrin homology domain containing, family G (with RhoGef domain) member 4	chr8:107899280-107906762	102075	NM_001081333	11.007	8.774	2.233	4.702	0.56493	0.00105	3.175
183	A_51_P168960	Cnpy1	canopy 1 homolog (zebrafish)	chr5:28528989-28572328	269637		8.712	6.494	2.218	4.653	0.26239	0.00072	3.903
184	A_51_P239203	Mapk13	mitogen activated protein kinase 13	chr17:28906306-28915647	26415	NM_011950	11.483	9.271	2.212	4.633	1	0.00292	1.387
185	A_51_P312956	AK034271					13.227	11.015	2.212	4.633	1	0.00198	2.02
186	A_51_P491635	Ly6g6e	lymphocyte antigen 6 complex, locus G6E	chr17:35213887-35215749	70274	NM_027366	9.636	7.425	2.21	4.628	1	0.01189	-0.733
187	A_52_P619248	Prl2c5	prolactin family 2, subfamily c, member 5	chr13:13274982-13284106	107849	NM_181852	7.924	5.713	2.21	4.628	0.38469	0.00084	3.54
188	A_52_P311297	Als2	amyotrophic lateral sclerosis 2 (juvenile) homolog (human)	chr1:59219776-59294063	74018	NM_028717	11.074	8.878	2.196	4.583	0.37133	0.00084	3.573
189	A_52_P600471	Cnksr3	Cnksr family member 3	chr10:3134304-3227479	215748	NM_172546	11.786	9.59	2.196	4.583	1	0.00198	2.021
190	A_52_P811124	AK047019					10.535	8.34	2.195	4.58	1	0.01174	-0.715
191	A_51_P438657	A130090K04Rik	RIKEN cDNA A130090K04 gene	chr10:3294060-3460745			11.653	9.458	2.194	4.577	1	0.00845	-0.234
192	A_51_P402575	1110012J17Rik	RIKEN cDNA 1110012J17 gene	chr17:66686326-66799087	68617	NM_172963	12.927	10.735	2.192	4.569	1	0.00188	2.117
193	A_51_P184728	Cnksr3	Cnksr family member 3	chr10:3134304-3227479	215748	NM_172546	12.332	10.149	2.183	4.54	0.05914	0.00041	5.312
194	A_51_P210591	Fcer2a*	Fc receptor, IgE, low affinity II, alpha polypeptide				7.874	5.692	2.182	4.537	0.21102	0.00064	4.109
195	A_52_P459077	AK032312					12.541	10.361	2.18	4.531	1	0.00372	1.024
196	A_52_P513177	Sla	src-like adaptor	chr15:66612434-66644284	20491	NM_009192	11.263	9.085	2.178	4.525	0.10355	0.00049	4.783
197	A_51_P455416	Mapk12	mitogen-activated protein kinase 12	chr15:88961015-88970902	29857	NM_013871	14.049	11.872	2.178	4.524	0.12607	0.00052	4.597
198	A_52_P448930	A730011C13Rik*	RIKEN cDNA A730011C13 gene				9.27	7.093	2.177	4.522	1	0.00146	2.59
199	A_52_P674593	Pde5a	phosphodiesterase 5A, cGMP-specific	chr3:122432076-122559070	242202	NM_153422	10.024	7.848	2.175	4.517	1	0.00164	2.39
200	A_52_P174525	Epb4.1	erythrocyte protein band 4.1	chr4:131479328-131631207	269587	NM_183428	12.011	9.84	2.171	4.503	0.23448	0.00067	4.009
201	A_51_P391777	Lin7a	lin-7 homolog A (C. elegans)	chr10:106708917-106857364	108030	NM_001039354, NM_001033223	8.161	5.997	2.165	4.484	1	0.0018	2.196
202	A_52_P220896	Epha3*	Eph receptor A3				10.51	8.346	2.164	4.48	1	0.00418	0.826
203	A_52_P179158	4930518C23Rik (Vmn2r-ps11)	RIKEN cDNA 4930518C23 gene	chr3:64436785-64461434			7.805	5.642	2.162	4.477	0.12407	0.00052	4.612
204	A_51_P289482	6430519N07Rik*	RIKEN cDNA 6430519N07 gene				12.27	10.108	2.162	4.476	1	0.02021	-1.47
205	A_52_P322336	9630021D06Rik*	RIKEN cDNA 9630021D06 gene				11.641	9.479	2.162	4.475	1	0.0043	0.783
206	A_51_P201196	A930006D11Rik (Zfp385c)	RIKEN cDNA A930006D11Rik gene	chr11:100488860-100518938	278304	NM_177790	8.297	6.136	2.162	4.474	0.57195	0.00106	3.164
207	A_51_P123895	D0H4S114	DNA segment, human D4S114	chr18:33596676-33623088	27528	NM_053078	10.084	7.927	2.157	4.46	1	0.01072	-0.585
208	A_52_P528456	3110001A13Rik	RIKEN cDNA 3110001A13 gene	chr2:3621285-3699414	66540	NM_025626	9.072	6.92	2.152	4.445	1	0.0065	0.151
209	A_52_P566396	Rnf122	ring finger protein 122	chr8:32222318-32241943	68867	NM_175136	8.665	6.513	2.152	4.445	1	0.00172	2.268
210	A_52_P249733	Tcap	titin-cap	chr11:98245125-98246267	21393	NM_011540	11.324	9.172	2.151	4.442	1	0.00396	0.914
211	A_51_P214985	Zfp521	zinc finger protein 521	chr18:13846725-14131145	225207	NM_145492	13.008	10.861	2.147	4.429	0.18932	0.00062	4.212
212	A_52_P497134	A730090H04Rik*	RIKEN cDNA A730090H04 gene				7.769	5.632	2.137	4.399	1	0.0015	2.555
213	A_52_P306351	Asph	aspartate-beta-hydroxylase	chr4:9376226-9596491	65973	NM_023066, NM_133723	13.439	11.306	2.134	4.388	0.64774	0.00113	3.045
214	A_52_P532323	Marveld2	MARVEL (membrane-associating) domain containing 2	chr13:101365914-101386903	218518	NM_001038602	8.089	5.961	2.129	4.373	0.18482	0.00062	4.235
215	A_51_P477458	Grid2	glutamate receptor, ionotropic, delta 2	chr6:63206851-64616273	14804	NM_008167	9.751	7.63	2.121	4.35	0.11943	0.00051	4.648
216	A_51_P410361	Lin7a*	lin-7 homolog A (C. elegans)				13.433	11.313	2.12	4.347	0.04855	0.00039	5.498
217	A_52_P48762	Lin7a*	lin-7 homolog A (C. elegans)				12.869	10.751	2.118	4.341	0.13535	0.00053	4.53
218	A_52_P1012653	AK087200					10.035	7.92	2.115	4.331	1	0.00387	0.947
219	A_51_P214612	AK032608					9.148	7.039	2.109	4.313	1	0.00583	0.306
220	A_52_P57177	Cadps2*	Ca2+-dependent activator protein for secretion 2				8.714	6.61	2.104	4.299	0.40933	0.00087	3.481
221	A_51_P191700	Col18a1	procollagen, type XVIII, alpha 1	chr10:76514926-76629246	12822	NM_009929	12.776	10.674	2.102	4.293	0.46363	0.00094	3.363
222	A_51_P390785	AK033340					8.941	6.84	2.101	4.291	1	0.00259	1.616
223	A_51_P416074	Ryr1	ryanodine receptor 1, skeletal muscle	chr7:29788363-29910170	20190	NM_009109	9.908	7.81	2.099	4.283	1	0.00155	2.486
224	A_51_P418560	Lnx2	ligand of numb-protein X 2	chr5:147828680-147888105	140887	NM_080795	10.716	8.621	2.094	4.271	1	0.00398	0.906
225	A_51_P406739	St8sia5	ST8 alpha-N-acetyl-neuraminide alpha-2,8-sialyltransferase 5	chr18:77424592-77494057	225742	NM_153124	13.256	11.165	2.091	4.26	0.23763	0.00068	3.997
226	A_52_P1130990	Trim67	tripartite motif-containing 67	chr8:127316992-127358602	330863		11.644	9.554	2.09	4.259	0.10898	0.00049	4.735
227	A_51_P131526	Ppm1d	protein phosphatase 1D magnesium-dependent, delta isoform	chr11:85124777-85160567	53892, 100045551	NM_016910	11.585	9.497	2.087	4.249	0.04987	0.00039	5.473
228	A_51_P484584	AK080157					9.575	7.492	2.084	4.239	1	0.0131	-0.871
229	A_52_P252258	Mapk12	mitogen-activated protein kinase 12	chr15:88961015-88970902	29857	NM_013871	14.21	12.127	2.083	4.238	0.20844	0.00064	4.121
230	A_52_P236398	AK039631					12.685	10.603	2.082	4.235	1	0.01251	-0.803
231	A_52_P261846	Col18a1	procollagen, type XVIII, alpha 1	chr10:76514926-76629246	12822	NM_009929	11.376	9.295	2.081	4.23	0.68088	0.00115	2.998
232	A_51_P497484	AI118078	expressed sequence AI118078	chr9:55174720-55286151	244886	NM_172923	10.999	8.921	2.079	4.225	0.46689	0.00094	3.356
233	A_51_P104478	Smpx	small muscle protein, X-linked	chrX:154137059-154190521	66106		11.257	9.184	2.072	4.206	0.0872	0.00046	4.946
234	A_51_P436269	Grin2c	glutamate receptor, ionotropic, NMDA2C (epsilon 3)	chr11:115110483-115128557	14813	NM_010350	14.985	12.913	2.072	4.203	0.20703	0.00064	4.127
235	A_52_P384931	Usp3*	ubiquitin specific peptidase 3				12.695	10.625	2.07	4.198	1	0.00159	2.436
236	A_51_P245558	Scnn1g	sodium channel, nonvoltage-gated 1 gamma	chr7:128877993-128911989	20278, 100047580	NM_011326	7.786	5.716	2.07	4.198	1	0.00245	1.709
237	A_51_P303160	Arg1	arginase 1, liver	chr10:24635036-24647246	11846		7.969	5.9	2.068	4.194	1	0.01234	-0.783
238	A_51_P210143	Syne2*	synaptic nuclear envelope 2	chr12:76919305-77024005			9.682	7.617	2.065	4.185	1	0.00385	0.959
239	A_51_P115335	Trim63*	tripartite motif-containing 63				10.888	8.824	2.063	4.18	1	0.02322	-1.656
240	A_52_P483391	Kcnk10	potassium channel, subfamily K, member 10	chr12:99672204-99816150	72258	NM_029911	9.48	7.416	2.063	4.179	1	0.00175	2.242
241	A_51_P351672	AK081115					10.984	8.923	2.061	4.172	1	0.01419	-0.982
242	A_51_P406734	St8sia5	ST8 alpha-N-acetyl-neuraminide alpha-2,8-sialyltransferase 5	chr18:77424592-77494057	225742	NM_153124	15.682	13.624	2.058	4.165	0.13249	0.00052	4.55
243	A_52_P1156435	AK048977					11.791	9.735	2.056	4.159	1	0.0022	1.876
244	A_52_P747251	AK036223					7.925	5.869	2.056	4.158	1	0.01051	-0.56
245	A_51_P104418	Dusp10	dual specificity phosphatase 10	chr1:185858325-185899429	63953	NM_022019	10.799	8.744	2.055	4.155	0.82972	0.00129	2.81
246	A_52_P600417	Rgs8	regulator of G-protein signaling 8	chr1:155500167-155544797	67792	NM_026380	16.334	14.28	2.054	4.152	0.10747	0.00049	4.748
247	A_52_P237997	Negr1	neuronal growth regulator 1	chr3:156224933-156979411	320840	NM_001039094, NM_177274	12.234	10.187	2.048	4.134	1	0.00731	-0.025
248	A_52_P672960	Camk4	calcium/calmodulin-dependent protein kinase IV	chr18:33098521-33346580	12326	NM_009793	13.558	11.512	2.046	4.13	1	0.00146	2.599
249	A_52_P207194	Dgkg*	diacylglycerol kinase, gamma				9.73	7.686	2.045	4.126	1	0.00938	-0.394
250	A_52_P175099	Grid2*	glutamate receptor, ionotropic, delta 2				11.726	9.682	2.045	4.126	1	0.00483	0.599
251	A_51_P240476	Dnahc11 (Dnahc11| Cdca7l)	dynein, axonemal, heavy chain 11	chr12:119116456-119437516| 12:119103482-119117178	13411| 217946	NM_010060	9.635	7.595	2.041	4.115	0.66751	0.00115	3.017
252	A_52_P605500	Mmp24 (BC029722| Mmp24)	matrix metallopeptidase 24	chr2:155643472-155644970| 2:155601080-155644102	17391	NM_010808	11.063	9.023	2.04	4.113	0.28322	0.00074	3.83
253	A_51_P414637	Col5a1	procollagen, type V, alpha 1	chr2:27742205-27893044	12831	NM_015734	10.52	8.491	2.029	4.081	0.52836	0.00103	3.239
254	A_51_P150044	Rps6ka1	ribosomal protein S6 kinase polypeptide 1	chr4:133403209-133443665	20111		12.736	10.707	2.029	4.08	1	0.014	-0.964
255	A_51_P395695	Slc13a1	solute carrier family 13 (sodium/sulphate symporters), member 1	chr6:24038295-24118092	55961	NM_019481	7.113	5.086	2.027	4.075	1	0.00467	0.649
256	A_52_P981179	A_52_P981179					10.081	8.059	2.022	4.061	0.01345	0.00031	6.706
257	A_51_P379341	Neurod2	neurogenic differentiation 2	chr11:98187861-98190908	18013	NM_010895	14.338	12.32	2.019	4.052	1	0.00866	-0.274
258	A_51_P151564	A730036I17Rik	RIKEN cDNA A730036I17 gene	chr2:129044705-129061074			7.843	5.824	2.018	4.051	1	0.00187	2.132
259	A_52_P1027537	5830490A04Rik*	RIKEN cDNA 5830490A04 gene				10.051	8.035	2.016	4.046	1	0.01584	-1.137
260	A_52_P336585	Als2	amyotrophic lateral sclerosis 2 (juvenile) homolog (human)	chr1:59219776-59294063	74018	NM_028717	9.467	7.46	2.007	4.02	0.05876	0.00041	5.318
261	A_51_P330630	Usp3	ubiquitin specific peptidase 3	chr9:66365688-66440896	235441	NM_144937	11.985	9.983	2.003	4.008	0.22383	0.00066	4.053
262	A_52_P2632	Negr1	neuronal growth regulator 1	chr3:156224933-156979411	320840	NM_001039094, NM_177274	13.114	11.113	2.001	4.004	1	0.00245	1.708
263	A_52_P485879	Grid2*	glutamate receptor, ionotropic, delta 2				9.854	7.853	2.001	4.003	1	0.00384	0.963
264	A_51_P428297	1700084M14Rik*	RIKEN cDNA 1700084M14 gene	chrX:88820553-88821250			10.697	8.696	2.001	4.002	1	0.00324	1.236
265	A_52_P17493	NAP041487-1					8.04	6.04	2	4.001	1	0.00146	2.593
266	A_52_P576208	A930018M24Rik*	RIKEN cDNA A930018M24 gene				11.107	9.111	1.996	3.99	0.75166	0.00121	2.904
267	A_52_P827311	AK047461					11.002	9.011	1.991	3.976	1	0.00144	2.618
268	A_51_P488780	Krt28	keratin 28	chr11:99226186-99236217	70843		9.552	7.567	1.986	3.961	0.40529	0.00086	3.49
269	A_51_P441898	Krt25	keratin 25	chr11:99177160-99184265	70810	NM_133730	9.301	7.319	1.982	3.951	0.03648	0.00038	5.768
270	A_52_P201867	Lpp*	LIM domain containing preferred translocation partner in lipoma				9.144	7.162	1.982	3.95	1	0.01275	-0.827
271	A_52_P730956	5930438M14*	hypothetical protein 5930438M14				7.614	5.632	1.982	3.95	1	0.00287	1.421
272	A_51_P502132	Mmp23	matrix metallopeptidase 23	chr4:155024764-155027493	26561	NM_011985	10.173	8.192	1.981	3.948	1	0.00213	1.92
273	A_52_P440599	Rgl3	ral guanine nucleotide dissociation stimulator-like 3	chr9:21775446-21793878	71746	NM_023622	10.923	8.948	1.976	3.933	1	0.00185	2.157
274	A_51_P283464	Icmt*	isoprenylcysteine carboxyl methyltransferase	chr4:151679873-151681228			13.857	11.886	1.971	3.921	0.36052	0.00082	3.601
275	A_51_P354563	Grid2*	glutamate receptor, ionotropic, delta 2				9.244	7.277	1.968	3.911	1	0.00682	0.068
276	A_52_P332081	Negr1	neuronal growth regulator 1	chr3:156224933-156979411	320840	NM_001039094, NM_177274	12.038	10.074	1.963	3.899	1	0.00243	1.72
277	A_51_P407515	6330407A03Rik*	RIKEN cDNA 6330407A03 gene				8.296	6.333	1.963	3.899	1	0.0072	-0.005
278	A_52_P172838	Fat2	FAT tumor suppressor homolog 2 (Drosophila)	chr11:55064111-55150066	245827	NM_001029988	7.136	5.178	1.958	3.885	1	0.00322	1.242
279	A_51_P432199	Sap30	sin3 associated polypeptide	chr8:59961504-59966659	60406	NM_021788	11.457	9.501	1.956	3.879	0.04154	0.00039	5.645
280	A_51_P117752	Asgr1	asialoglycoprotein receptor 1	chr11:69867871-69871396	11889	NM_009714	11.691	9.738	1.954	3.874	1	0.01345	-0.908
281	A_51_P512205	Unc13d	unc-13 homolog D (C. elegans)	chr11:115923409-115939275	70450	NM_001009573	9.306	7.352	1.954	3.874	1	0.00267	1.547
282	A_51_P288193	Btg1	B-cell translocation gene 1, anti-proliferative	chr10:96079640-96082259	12226	NM_007569	15.242	13.29	1.953	3.871	0.94579	0.00139	2.686
283	A_51_P327831	Actg-ps1*	actin, gamma, pseudogene 1				8.668	6.718	1.95	3.864	1	0.00239	1.754
284	A_52_P86165	9430040K09Rik*	RIKEN cDNA 9430040K09 gene				9.207	7.257	1.949	3.862	1	0.00645	0.163
285	A_52_P1052029	AK031632					8.792	6.853	1.939	3.834	1	0.00172	2.274
286	A_51_P180061	Als2	amyotrophic lateral sclerosis 2 (juvenile) homolog (human)	chr1:59219776-59294063	74018	NM_028717	8.613	6.676	1.936	3.827	0.05701	0.00041	5.347
287	A_51_P300552	Neb*	nebulin				7.206	5.27	1.936	3.826	1	0.01825	-1.331
288	A_51_P124784	Acpl2	acid phosphatase-like 2	chr9:96723762-96789893	235534	NM_153420	12.542	10.607	1.935	3.824	0.51514	0.00101	3.263
289	A_52_P428654	Zic1	zinc finger protein of the cerebellum 1	chr9:91255410-91260648	100044533, 22771	NM_009573	15.883	13.949	1.934	3.821	0.55527	0.00104	3.192
290	A_52_P544274	AK033989					8.636	6.702	1.934	3.82	1	0.00494	0.565
291	A_51_P383737	Ankrd25 (Kank2)	ankyrin repeat domain 25	chr9:21571233-21602979	235041	NM_145611	9.033	7.101	1.933	3.818	0.54541	0.00104	3.209
292	A_52_P161495	Bcl6	B-cell leukemia/lymphoma 6	chr16:23965160-23988721	12053	NM_009744	14.278	12.346	1.932	3.817	0.06664	0.00042	5.2
293	A_52_P565567	Grm4	glutamate receptor, metabotropic 4	chr17:27559332-27650286	268934	NM_001013385	8.848	6.917	1.931	3.813	1	0.01356	-0.921
294	A_52_P1139491	4930588G05Rik*	RIKEN cDNA 4930588G05 gene				10.556	8.631	1.924	3.796	1	0.02501	-1.755
295	A_51_P149422	Gng13	guanine nucleotide binding protein 13, gamma	chr17:25854473-25856029	64337	NM_022422	17.371	15.453	1.919	3.781	0.08627	0.00046	4.956
296	A_51_P436491	BC072620 (Lingo3)	cDNA sequence BC072620	chr10:80295552-80306775	237403	NM_001013758	13.661	11.744	1.917	3.776	0.76132	0.00122	2.892
297	A_51_P194230	Zic1	zinc finger protein of the cerebellum 1	chr9:91255410-91260648	100044533, 22771	NM_009573	15.85	13.934	1.915	3.772	1	0.0017	2.308
298	A_52_P301821	D0H4S114	DNA segment, human D4S114	chr18:33596676-33623088	27528	NM_053078	10.574	8.662	1.913	3.765	1	0.00936	-0.389
299	A_52_P684817	5330437M03Rik*	RIKEN cDNA 5330437M03 gene				9.952	8.041	1.911	3.762	1	0.00574	0.332
300	A_51_P162313	Tssk5	testis-specific serine kinase 5	chr15:76202388-76205368	73542	NM_183099	9.394	7.489	1.905	3.746	0.02282	0.00034	6.21
301	A_52_P633719	AK035829					8.753	6.847	1.905	3.746	1	0.00168	2.328
302	A_51_P403378	Cnr1	cannabinoid receptor 1 (brain)	chr4:34011607-34035796	12801	NM_007726	11.047	9.142	1.904	3.744	0.67196	0.00115	3.01
303	A_51_P487518	Casp12	caspase 12	chr9:5345502-5373034	100044205, 12364	NM_009808	9.419	7.516	1.903	3.74	1	0.00152	2.518
304	A_52_P610965	St18	suppression of tumorigenicity 18	chr1:6720132-6851021	240690		11.083	9.184	1.898	3.727	1	0.04178	-2.429
305	A_52_P186785	BG079886		chr12:24564759-24862362			14.071	12.173	1.898	3.727	1	0.00653	0.143
306	A_51_P330749	Syt2	synaptotagmin II	chr1:136543258-136649726	20980	NM_009307	9.676	7.779	1.896	3.723	0.69457	0.00116	2.979
307	A_52_P620448	Mab21l1	mab-21-like 1 (C. elegans)	chr3:55586462-55588797	17116	NM_010750	10.552	8.657	1.895	3.718	1	0.03141	-2.055
308	A_51_P175303	Tle2*	transducin-like enhancer of split 2, homolog of Drosophila E(spl)				13.845	11.951	1.894	3.717	0.74752	0.00121	2.909
309	A_51_P197596	Afap1l2	actin filament associated protein 1-like 2	chr19:56986850-57082718	226250	NM_146102	12.236	10.342	1.894	3.716	1	0.0047	0.636
310	A_51_P200447	Pkib	protein kinase inhibitor beta, cAMP dependent, testis specific	chr10:57351887-57460918	18768	NM_008863, NM_001039050, NM_001039051, NM_001039052	11.138	9.247	1.891	3.71	1	0.00403	0.885
311	A_52_P1164184	AK038833					9.181	7.29	1.891	3.708	1	0.03435	-2.175
312	A_51_P516219	AK036773					9.958	8.068	1.89	3.706	1	0.00922	-0.367
313	A_52_P1108501	AK085530					7.62	5.737	1.883	3.688	1	0.00462	0.671
314	A_51_P425657	Pard6g	par-6 partitioning defective 6 homolog gamma (C. elegans)	chr18:80243657-80316103	93737	NM_053117	11.661	9.782	1.879	3.678	1	0.00178	2.212
315	A_52_P739765	AK087374	Putative uncharacterized protein [Source:UniProtKB/TrEMBL;Acc:Q8BN85]	chr6:104680367-104681687			9.007	7.129	1.878	3.676	1	0.0068	0.076
316	A_51_P487360	Hpcal1	hippocalcin-like 1	chr12:17697620-17798732	53602	NM_016677	15.529	13.653	1.876	3.671	1	0.00442	0.748
317	A_51_P508666	2900069M18Rik*	RIKEN cDNA 2900069M18 gene				9.332	7.462	1.87	3.656	1	0.00956	-0.421
318	A_51_P175567	Dact1	dapper homolog 1, antagonist of beta-catenin (xenopus)	chr12:72410971-72421077	59036	NM_021532	10.147	8.28	1.866	3.646	1	0.00536	0.44
319	A_52_P468683	6430571L13Rik	RIKEN cDNA 6430571L13 gene	chr9:107242971-107252014	235599	NM_175486	10.334	8.471	1.863	3.639	1	0.0019	2.099
320	A_52_P45616	Emilin3	elastin microfibril interfacer 3	chr2:160732173-160738064	280635	NM_182840	10.094	8.231	1.863	3.638	0.0155	0.00032	6.573
321	A_52_P115541	1700095G12Rik (Spem1)	RIKEN cDNA 1700095G12 gene	chr11:69634400-69635682	74288	NM_028855	8.062	6.199	1.863	3.637	1	0.00164	2.37
322	A_52_P298986	Lin7a	lin-7 homolog A (C. elegans)	chr10:106708917-106857364	108030	NM_001039354, NM_001033223	9.511	7.659	1.852	3.61	0.0295	0.00038	5.968
323	A_51_P488646	Bmp1	bone morphogenetic protein 1	chr14:70874367-70919995	12153	NM_009755	13.128	11.28	1.848	3.6	1	0.0031	1.296
324	A_52_P429364	Ccdc69	coiled-coil domain containing 69	chr11:54863240-54891633	52570	NM_177471	9.447	7.602	1.845	3.593	0.07734	0.00044	5.059
325	A_52_P441058	EG637004*	predicted gene, EG637004	chr3:63937826-63938314			6.965	5.125	1.84	3.58	0.40384	0.00086	3.494
326	A_52_P228794	Gm941 (Sos1)	gene model 941, (NCBI)	chr17:80793092-80879793	20662	NM_009231	8.545	6.706	1.838	3.576	0.3388	0.00079	3.66
327	A_52_P778559	A230106O10Rik*	RIKEN cDNA A230106O10 gene				7.693	5.858	1.834	3.566	1	0.00255	1.64
328	A_52_P690983	AK038046					7.311	5.484	1.826	3.547	1	0.00444	0.737
329	A_52_P21550	Gcnt1*	glucosaminyl (N-acetyl) transferase 1, core 2				7.595	5.77	1.826	3.544	1	0.00257	1.63
330	A_52_P600822	Prkcz	protein kinase C, zeta	chr4:154634235-154735449	18762	NM_008860, NM_001039079	10.114	8.295	1.82	3.53	0.86966	0.00132	2.765
331	A_52_P436258	Btg1	B-cell translocation gene 1, anti-proliferative	chr10:96079640-96082259	12226	NM_007569	10.541	8.722	1.819	3.529	1	0.0126	-0.813
332	A_52_P276776	Als2	amyotrophic lateral sclerosis 2 (juvenile) homolog (human)	chr1:59219776-59294063	74018	NM_028717	8.751	6.933	1.818	3.527	1	0.00257	1.629
333	A_52_P636742	Rnf122	ring finger protein 122	chr8:32222318-32241943	68867	NM_175136	10.831	9.013	1.818	3.525	1	0.00156	2.466
334	A_51_P463060	Tmem40	transmembrane protein 40	chr6:115679149-115709289	94346	NM_144805	10.16	8.342	1.817	3.524	1	0.01085	-0.603
335	A_51_P358344	Col17a1	procollagen, type XVII, alpha 1	chr19:47720852-47766584	12821	NM_007732	7.373	5.56	1.812	3.512	0.11148	0.0005	4.713
336	A_52_P210424	Cacna1a	calcium channel, voltage-dependent, P/Q type, alpha 1A subunit	chr8:86939263-87164148	12286		9.066	7.261	1.805	3.495	1	0.0024	1.748
337	A_52_P580159	1110012J17Rik*	RIKEN cDNA 1110012J17 gene				12.272	10.468	1.804	3.492	1	0.00171	2.29
338	A_52_P569023	4930544G21Rik (Sphkap)	RIKEN cDNA 4930544G21 gene	chr1:83252021-83404741	77629		10.459	8.656	1.803	3.49	0.33822	0.00079	3.662
339	A_52_P598912	Erc1	ELKS/RAB6-interacting/CAST family member 1	chr6:119520822-119798168	111173, 100048600	NM_053204, NM_178085	10.768	8.965	1.803	3.489	0.28548	0.00074	3.823
340	A_51_P437079	5730559C18Rik	RIKEN cDNA 5730559C18 gene	chr1:138110108-138130841	67313	NM_028872	11.148	9.346	1.802	3.487	1	0.0233	-1.661
341	A_52_P1059487	6330510M09Rik*	RIKEN cDNA 6330510M09 gene				10.057	8.258	1.8	3.481	1	0.01465	-1.032
342	A_52_P110052	Darc	Duffy blood group, chemokine receptor	chr1:175261942-175263575	13349	NM_010045	13.77	11.972	1.797	3.476	0.07632	0.00044	5.071
343	A_52_P415155	Wnt6	wingless-related MMTV integration site 6	chr1:74818466-74831893	22420	NM_009526	9.957	8.16	1.797	3.476	1	0.01282	-0.837
344	A_52_P646312	Plekha5	pleckstrin homology domain containing, family A member 5	chr6:140372620-140544804	109135	NM_144920	13.46	11.674	1.786	3.449	1	0.00156	2.471
345	A_51_P146560	Msln	mesothelin	chr17:25885559-25891322	56047	NM_018857	9.83	8.046	1.784	3.444	1	0.00283	1.445
346	A_51_P111950	Zic5	zinc finger protein of the cerebellum 5	chr11:56272971-56273576| 14:122858382-122864899| 11:56272851-56273576	676464, 624168, 65100	NM_022987	7.46	5.681	1.779	3.431	1	0.00213	1.924
347	A_52_P763635	AK087135					9.191	7.414	1.777	3.428	1	0.01008	-0.497
348	A_52_P130044	TC1632596					10.99	9.213	1.777	3.427	1	0.01043	-0.547
349	A_51_P364014	Inpp5a	inositol polyphosphate-5-phosphatase A	chr7:146575008-146765551	212111	NM_183144	14.158	12.382	1.777	3.426	1	0.00239	1.755
350	A_52_P592101	D6Wsu116e	DNA segment, Chr 6, Wayne State University 116, expressed	chr6:116158056-116212686	28006	NM_026585	13.851	12.081	1.769	3.409	0.00815	0.00024	7.176
351	A_51_P369224	Prdm8*	PR domain containing 8				7.767	5.999	1.768	3.406	0.12571	0.00052	4.6
352	A_52_P899611	AK047096					9.095	7.329	1.766	3.402	1	0.00264	1.577
353	A_52_P246852	Ndst3	N-deacetylase/N-sulfotransferase (heparan glucosaminyl) 3	chr3:123229087-123375310	83398		8.807	7.042	1.765	3.399	1	0.00176	2.234
354	A_51_P354994	AK138222					9.651	7.887	1.764	3.397	1	0.00481	0.605
355	A_52_P1077539	TC1666230					8.022	6.257	1.764	3.397	1	0.00222	1.861
356	A_51_P308227	Mpp7*	membrane protein, palmitoylated 7 (MAGUK p55 subfamily member 7)				8.738	6.975	1.763	3.393	1	0.00287	1.417
357	A_52_P68735	Shf	Src homology 2 domain containing F	chr2:122174629-122194568	435684	NM_001013829	11.051	9.293	1.758	3.382	1	0.00187	2.132
358	A_52_P435042	Mpp4	membrane protein, palmitoylated 4 (MAGUK p55 subfamily member 4)	chr1:59177780-59218397	227157		8.189	6.434	1.755	3.376	1	0.01036	-0.536
359	A_51_P303217	1110017I16Rik	RIKEN cDNA 1110017I16 gene	chr2:4897227-4906791	68527	NM_026754	11.421	9.665	1.755	3.376	1	0.01658	-1.199
360	A_52_P690772	AK044646					6.847	5.095	1.752	3.369	1	0.00342	1.157
361	A_51_P145404	Tuba3a	tubulin, alpha 3A	chr6:125228307-125236060	22144, 22147	NM_009446	9.504	7.758	1.746	3.354	1	0.01461	-1.025
362	A_52_P624475	Neurod2	neurogenic differentiation 2	chr11:98187861-98190908	18013	NM_010895	10.073	8.329	1.745	3.351	1	0.01512	-1.08
363	A_51_P343833	Traf1	Tnf receptor-associated factor 1	chr2:34798776-34817292	22029	NM_009421	10.886	9.143	1.743	3.347	1	0.0267	-1.84
364	A_52_P488683	Adamts18*	a disintegrin-like and metallopeptidase (reprolysin type) with thrombospondin type 1 motif, 18				6.667	4.928	1.738	3.337	0.98561	0.00141	2.646
365	A_51_P150023	1700023E05Rik	RIKEN cDNA 1700023E05 gene	chr5:77445048-77490554	71868	NM_027970	7.705	5.967	1.738	3.335	0.6061	0.00109	3.108
366	A_52_P1116185	AK051921					9.25	7.514	1.736	3.33	1	0.01898	-1.384
367	A_51_P471219	6430571L13Rik	RIKEN cDNA 6430571L13 gene	chr9:107242971-107252014	235599	NM_175486	8.466	6.73	1.736	3.33	0.89931	0.00134	2.733
368	A_52_P166860	5330427O13Rik*	RIKEN cDNA 5330427O13 gene				9.884	8.149	1.735	3.329	1	0.0378	-2.297
369	A_52_P367983	Zfp533*	zinc finger protein 533				11.429	9.693	1.735	3.329	1	0.01489	-1.059
370	A_52_P537175	Krba1*	KRAB-A domain containing 1				10.242	8.51	1.732	3.322	0.83374	0.00129	2.805
371	A_51_P153042	Psg16	pregnancy specific glycoprotein 16	chr7:17659389-17718791	26436		10.703	8.972	1.731	3.319	0.03445	0.00038	5.822
372	A_52_P1124519	AK085586					9.118	7.388	1.731	3.319	1	0.00787	-0.133
373	A_51_P181354	5330430B06Rik*	RIKEN cDNA 5330430B06 gene				9.219	7.49	1.728	3.313	1	0.02341	-1.667
374	A_52_P995564	A930018M24Rik*	RIKEN cDNA A930018M24 gene				8.164	6.436	1.728	3.312	1	0.00247	1.696
375	A_52_P301103	Tob2*	transducer of ERBB2, 2	chr15:81678700-81688756	57259	NM_020507	11.661	9.935	1.726	3.309	1	0.01615	-1.162
376	A_52_P447064	Il20rb*	interleukin 20 receptor beta				9.066	7.34	1.726	3.308	1	0.00513	0.502
377	A_51_P311362	4930449E01Rik	RIKEN cDNA 4930449E01 gene	chr14:105898005-105904839			10.621	8.895	1.726	3.308	1	0.02411	-1.707
378	A_52_P349013	9430022A07Rik*	RIKEN cDNA 9430022A07 gene				7.497	5.771	1.725	3.307	1	0.01682	-1.219
379	A_52_P384209	Syne1*	synaptic nuclear envelope 1				7.363	5.638	1.725	3.306	1	0.00164	2.368
380	A_51_P404193	Sp5	trans-acting transcription factor 5	chr2:70312980-70315783	64406	NM_022435	10.043	8.32	1.723	3.301	1	0.00401	0.894
381	A_51_P122055	D17H6S56E-3	DNA segment, Chr 17, human D6S56E 3	chr17:35153524-35163686	27762	NM_138582	8.416	6.695	1.721	3.296	1	0.01787	-1.303
382	A_51_P247625	AK038600					9.448	7.727	1.721	3.296	1	0.01998	-1.451
383	A_52_P1044262	AK051949					8.381	6.663	1.718	3.29	1	0.00846	-0.238
384	A_51_P335729	AK039370					10.997	9.281	1.716	3.284	1	0.00383	0.966
385	A_51_P452953	Rhod*	ras homolog gene family, member D				10.485	8.77	1.715	3.283	0.04786	0.00039	5.512
386	A_51_P382331	Os9*	amplified in osteosarcoma				7.369	5.66	1.709	3.27	1	0.00175	2.245
387	A_51_P104162	Gfod1*	glucose-fructose oxidoreductase domain containing 1				10.415	8.709	1.706	3.262	1	0.03206	-2.082
388	A_52_P324825	Tspan9	tetraspanin 9	chr6:127911414-128093596	109246	NM_175414	16.31	14.605	1.705	3.26	0.17121	0.0006	4.307
389	A_51_P296182	Slc43a2*	solute carrier family 43, member 2				11.289	9.585	1.705	3.26	1	0.0153	-1.095
390	A_52_P306831	Pram1	PML-RAR alpha-regulated adaptor molecule 1	chr17:33775047-33782645	378460	NM_001002842	8.549	6.845	1.703	3.256	0.16528	0.00059	4.341
391	A_52_P506217	Rhod	ras homolog gene family, member D	chr19:4425667-4439433	11854	NM_007485	11.045	9.343	1.702	3.253	0.03814	0.00038	5.726
392	A_52_P344152	Pik3ip1	phosphoinositide-3-kinase interacting protein 1	chr11:3230793-3242973	216505	NM_178149	10.808	9.109	1.699	3.248	1	0.00179	2.205
393	A_51_P141413	Mgl1	macrophage galactose N-acetyl-galactosamine specific lectin 1	chr11:69980169-69984335	17312	NM_010796	9.684	7.985	1.699	3.246	0.02364	0.00034	6.176
394	A_51_P444302	AK039273					10.618	8.921	1.697	3.242	1	0.03112	-2.043
395	A_51_P490337	4930572D21Rik (Tmem190)	RIKEN cDNA 4930572D21 gene	chr7:4734550-4735938	78052		7.218	5.522	1.696	3.24	1	0.00259	1.61
396	A_52_P545536	2310045A20Rik*	RIKEN cDNA 2310045A20 gene				7.124	5.431	1.693	3.233	1	0.00257	1.63
397	A_52_P582568	Ust	uronyl-2-sulfotransferase	chr10:7924551-8238623	338362	NM_177387	10.583	8.891	1.692	3.23	0.22552	0.00066	4.046
398	A_52_P1123773	AK046977					9.341	7.649	1.692	3.23	1	0.023	-1.642
399	A_51_P407841	Cd200r1	CD200 receptor 1	chr16:44765891-44795087	57781	NM_021325	7.705	6.015	1.689	3.225	1	0.00164	2.382
400	A_51_P325856	1810033B17Rik	RIKEN cDNA 1810033B17 gene	chr8:3665756-3669259	69189	NM_026985	8.235	6.55	1.686	3.217	0.01641	0.00032	6.519
401	A_51_P137336	Cdh1	cadherin 1	chr8:109127268-109194146	12550	NM_009864	9.461	7.78	1.681	3.207	1	0.02748	-1.879
402	A_51_P474094	AK034505					8.651	6.971	1.68	3.205	1	0.02213	-1.592
403	A_52_P980627	AK080322					8.992	7.313	1.679	3.201	1	0.01218	-0.764
404	A_52_P212025	Ror1	receptor tyrosine kinase-like orphan receptor 1	chr4:99768396-100117370	26563	NM_013845	7.297	5.622	1.675	3.193	1	0.0193	-1.405
405	A_52_P536260	NAP067549-1					8.861	7.186	1.674	3.192	1	0.00574	0.333
406	A_52_P397313	Epb4.1*	erythrocyte protein band 4.1				7.585	5.912	1.673	3.189	1	0.00787	-0.137
407	A_52_P255458	Air*	antisense Igf2r RNA				7.443	5.772	1.671	3.185	1	0.00464	0.661
408	A_51_P430833	TC1695335					10.711	9.039	1.671	3.185	1	0.00274	1.505
409	A_51_P197146	5830400J07Rik*	RIKEN cDNA 5830400J07 gene				8.142	6.471	1.671	3.184	1	0.00265	1.561
410	A_52_P87843	Aldh1a3	aldehyde dehydrogenase family 1, subfamily A3	chr7:73535781-73572363	56847	NM_053080	8.111	6.442	1.669	3.181	1	0.003	1.347
411	A_51_P501844	Cyp26b1	cytochrome P450, family 26, subfamily b, polypeptide 1	chr6:84521938-84543740	232174	NM_175475	12.126	10.457	1.669	3.18	1	0.00734	-0.03
412	A_51_P108767	Rad54l	RAD54 like (S. cerevisiae)	chr4:115769603-115796290	19366	NM_009015	7.981	6.313	1.668	3.178	0.98785	0.00141	2.644
413	A_51_P388042	Zfp238	zinc finger protein 238	chr1:179374792-179380891	30928	NM_001012330, NM_013915	15.265	13.598	1.667	3.176	1	0.0029	1.408
414	A_52_P445853	Car15	carbonic anhydrase 15	chr16:17835369-17838457	80733		9.337	7.67	1.667	3.176	1	0.0029	1.4
415	A_51_P267375	Pip5k2b*	phosphatidylinositol-4-phosphate 5-kinase, type II, beta				9.072	7.407	1.665	3.171	1	0.00787	-0.138
416	A_52_P240232	NAP052665-1					10.457	8.794	1.663	3.167	1	0.00586	0.295
417	A_52_P563860	Nck1	non-catalytic region of tyrosine kinase adaptor protein 1	chr9:100392712-100446472	17973	NM_010878	10.043	8.381	1.662	3.164	1	0.00328	1.217
418	A_52_P684798	Alms1	Alstrom syndrome 1 homolog (human)	chr6:85537525-85652636	100043493, 236266, 623273	NM_145223	10.925	9.264	1.661	3.162	1	0.00164	2.369
419	A_52_P553109	AK042731					8.631	6.971	1.66	3.16	1	0.02196	-1.582
420	A_52_P453508	Dnase2a*	deoxyribonuclease II alpha				9.109	7.449	1.66	3.16	0.54847	0.00104	3.203
421	A_51_P383194	Pde9a	phosphodiesterase 9A	chr17:31523196-31613254	18585	NM_008804	13.141	11.482	1.659	3.158	0.03713	0.00038	5.751
422	A_51_P447966	AK038765					10.553	8.897	1.656	3.152	1	0.02579	-1.792
423	A_52_P511450	Prl2c5	prolactin family 2, subfamily c, member 5	chr13:13274982-13284106	107849	NM_181852	6.571	4.919	1.652	3.143	0.63651	0.00112	3.062
424	A_51_P483436	4930404H21Rik	RIKEN cDNA 4930404H21 gene	chr7:140778707-140793841	73808	NM_028654	7.452	5.8	1.652	3.142	0.03899	0.00038	5.705
425	A_51_P246104	1700019M22Rik*	RIKEN cDNA 1700019M22 gene				8.366	6.715	1.651	3.14	1	0.00353	1.109
426	A_51_P268863	Car10	carbonic anhydrase 10	chr11:92959718-93463059	72605	NM_028296	8.823	7.175	1.648	3.135	1	0.00443	0.742
427	A_52_P891818	AK047526					8.693	7.045	1.648	3.134	1	0.02159	-1.557
428	A_51_P439711	Rif1	Rap1 interacting factor 1 homolog (yeast)	chr2:51928352-51977903	51869		12.02	10.38	1.64	3.116	1	0.01347	-0.91
429	A_52_P714908	AK035799					9.052	7.414	1.638	3.113	1	0.01993	-1.447
430	A_52_P124320	9130227C08Rik (2310014G06Rik)	RIKEN cDNA 9130227C08Rik gene	chr14:56516124-56519061	654795	NM_001082975	9.549	7.913	1.636	3.109	1	0.0049	0.573
431	A_52_P819979	AK078658					9.368	7.734	1.634	3.104	1	0.02264	-1.622
432	A_52_P552665	Fzd7	frizzled homolog 7 (Drosophila)	chr1:59539023-59543791	14369	NM_008057	10.397	8.762	1.634	3.104	1	0.01046	-0.553
433	A_51_P361022	Cdc20	cell division cycle 20 homolog (S. cerevisiae)	chr4:118105508-118109899	107995	NM_023223	10.79	9.159	1.631	3.098	0.01013	0.00026	6.972
434	A_51_P253652	A830012C17Rik*	RIKEN cDNA A830012C17 gene				7.063	5.432	1.63	3.096	1	0.00264	1.576
435	A_51_P164835	Ppl	periplakin	chr16:5086384-5132574	19041	NM_008909	9.115	7.488	1.627	3.088	0.04513	0.00039	5.567
436	A_51_P482571	Wnt6	wingless-related MMTV integration site 6	chr1:74818466-74831893	22420	NM_009526	10.882	9.256	1.626	3.086	1	0.00299	1.351
437	A_52_P522210	Epb4.1	erythrocyte protein band 4.1	chr4:131479328-131631207	269587	NM_183428	9.459	7.834	1.625	3.084	1	0.00212	1.934
438	A_51_P431025	BC027561					11.769	10.146	1.622	3.079	1	0.03377	-2.152
439	A_51_P264769	Dmp1	dentin matrix protein 1	chr5:104631632-104643121	13406	NM_016779	8.984	7.363	1.621	3.076	1	0.00277	1.482
440	A_51_P312779	Prl2c3 (Prl2c4, Prl2c3)	prolactin family 2, subfamily c, member 3	chr13:12883089-12892345	18812, 26421	NM_011118	7.497	5.877	1.62	3.074	0.09492	0.00047	4.865
441	A_51_P314186	Syne1	synaptic nuclear envelope 1	chr10:4795849-5326338	64009	NM_153399, NM_022027	12.241	10.623	1.619	3.071	1	0.00423	0.808
442	A_51_P437247	Centd2 (Arap1)	centaurin, delta 2	chr7:108496583-108561100	69710	NM_001040111, NM_027180, NM_001040112, NM_198096	9.787	8.17	1.617	3.067	1	0.00171	2.293
443	A_51_P418725	Plekhf1	pleckstrin homology domain containing, family F (with FYVE domain) member 1	chr7:39005694-39013010	72287	NM_024413	11.134	9.519	1.615	3.063	0.04748	0.00039	5.519
444	A_51_P464146	Ankrd56*	ankyrin repeat domain 56				10.861	9.247	1.614	3.062	1	0.00777	-0.111
445	A_51_P328039	Tlx3	T-cell leukemia, homeobox 3	chr11:33100752-33103588	27140	NM_019916	6.913	5.3	1.613	3.059	0.04331	0.00039	5.606
446	A_51_P166152	Spp2	secreted phosphoprotein 2	chr1:90303633-90323006	75396	NM_029269	9.184	7.572	1.612	3.056	1	0.00376	1.006
447	A_51_P363947	Cdkn1a	cyclin-dependent kinase inhibitor 1A (P21)	chr17:29227924-29237667	12575	NM_007669	11.072	9.463	1.609	3.05	1	0.04279	-2.461
448	A_51_P309307	(Bcl2l15)	BCLl2-like 15 Gene [Source:MGI (curated);Acc:Bcl2l15-002]	chr3:103636524-103658541			8.941	7.333	1.608	3.048	0.68805	0.00116	2.988
449	A_52_P161780	Galnt13	UDP-N-acetyl-alpha-D-galactosamine:polypeptide N-acetylgalactosaminyltransferase 13	chr2:54288728-54970720	271786	NM_173030	11.171	9.563	1.607	3.047	1	0.00356	1.088
450	A_52_P467588	Git2	G protein-coupled receptor kinase-interactor 2	chr5:115177417-115223501	26431	NM_019834, NM_001077360	13.118	11.51	1.607	3.047	0.05655	0.00041	5.355
451	A_52_P365491	0710005M24Rik*	RIKEN cDNA 0710005M24 gene				9.094	7.489	1.605	3.042	1	0.01018	-0.511
452	A_52_P313933	1700057H21Rik*	RIKEN cDNA 1700057H21 gene				7.075	5.473	1.602	3.035	0.00355	0.00018	7.953
453	A_52_P240447	Alms1	Alstrom syndrome 1 homolog (human)	chr6:85537525-85652636	100043493, 236266, 623273	NM_145223	9.737	8.136	1.601	3.033	1	0.02442	-1.725
454	A_52_P373852	Foxo3a*	forkhead box O3a				8.034	6.434	1.6	3.032	1	0.00932	-0.383
455	A_52_P652560	Chgb*	chromogranin B				8.002	6.404	1.598	3.027	1	0.01287	-0.845
456	A_51_P325941	Kcnj12	potassium inwardly-rectifying channel, subfamily J, member 12	chr11:60836066-60884631	16515	NM_010603	12.318	10.72	1.598	3.027	0.40498	0.00086	3.491
457	A_52_P1164452	AK048332					8.863	7.267	1.596	3.024	1	0.00429	0.787
458	A_51_P474498	Tac4	tachykinin 4	chr11:95122843-95130576	93670	NM_053093	7.322	5.727	1.596	3.022	0.10212	0.00049	4.796
459	A_52_P674467	Lin7a	lin-7 homolog A (C. elegans)	chr10:106708917-106857364	108030	NM_001039354, NM_001033223	11.962	10.367	1.595	3.022	0.32778	0.00079	3.692
460	A_52_P187820	Arhgap26*	Rho GTPase activating protein 26				8.553	6.958	1.595	3.021	1	0.00286	1.428
461	A_52_P150654	B930037P14Rik*	RIKEN cDNA B930037P14 gene				8.518	6.923	1.595	3.021	0.83456	0.00129	2.804
462	A_51_P395705	1700069L16Rik*	RIKEN cDNA 1700069L16 gene				6.969	5.375	1.595	3.021	0.08912	0.00046	4.925
463	A_51_P214360	Vgll1	vestigial like 1 homolog (Drosophila)	chrX:54341283-54359717	170828	NM_133251	10.185	8.592	1.593	3.016	1	0.01317	-0.88
464	A_52_P26195	Meis1	myeloid ecotropic viral integration site 1	chr11:18780674-18918964	17268	NM_010789	10.058	8.47	1.588	3.006	1	0.01377	-0.941
465	A_51_P196718	Adcy1	adenylate cyclase 1	chr11:6963492-7078509	432530	NM_009622	15.565	13.979	1.587	3.003	1	0.00283	1.448
466	A_51_P311611	Darc	Duffy blood group, chemokine receptor	chr1:175261942-175263575	13349	NM_010045	12.397	10.812	1.586	3.002	1	0.00269	1.535
467	A_52_P206429	Odz3	odd Oz/ten-m homolog 3 (Drosophila)	chr8:49313036-49929268	23965	NM_011857	6.288	7.873	-1.585	0.333	1	0.00263	1.586
468	A_52_P203560	Fzd10	frizzled homolog 10 (Drosophila)	chr5:129106719-129109968	93897		9.299	10.886	-1.587	0.333	1	0.00166	2.35
469	A_51_P153423	Fndc1	fibronectin type III domain containing 1	chr17:7931433-7997839	68655, 100039091	NM_001081416	8.7	10.289	-1.589	0.332	1	0.00545	0.416
470	A_52_P121502	Pllp	plasma membrane proteolipid	chr8:97199344-97220130	67801	NM_026385	11.515	13.105	-1.59	0.332	1	0.00809	-0.175
471	A_52_P883455	AK045833					6.277	7.869	-1.591	0.332	1	0.014	-0.964
472	A_51_P414047	AK047328					6.677	8.271	-1.594	0.331	1	0.00459	0.684
473	A_51_P145130	Mcpt4 (Mcpt4, Mcpt3| Cma2)	mast cell protease 4	chr14:56678584-56681147| 14:56590265-56592832	17227| 100044175, 545055	NM_010779| NM_001024714	6.041	7.635	-1.594	0.331	1	0.00219	1.882
474	A_52_P223127	Synpo2	synaptopodin 2	chr3:122779437-122939065	118449		5.929	7.524	-1.595	0.331	1	0.01873	-1.365
475	A_52_P188827	Rasgef1b	RasGEF domain family, member 1B	chr5:99646445-99681873	100044232, 320292	NM_145839	11.039	12.634	-1.595	0.331	1	0.00259	1.606
476	A_51_P451957	Cpne6	copine VI	chr14:56129456-56136266	12891	NM_009947	13.759	15.36	-1.601	0.33	1	0.02065	-1.5
477	A_51_P469688	Syt17	synaptotagmin XVII	chr7:125524234-125591704	110058	NM_138649	7.142	8.743	-1.601	0.33	1	0.00282	1.459
478	A_52_P571561	4930431J08Rik (Zdbf2)	RIKEN cDNA 4930431J08 gene	chr1:63319839-63361150			7.919	9.52	-1.601	0.33	1	0.00706	0.023
479	A_51_P257333	AK044003					6.752	8.355	-1.603	0.329	1	0.00342	1.163
480	A_52_P35384	Drd5	dopamine receptor 5	chr5:38710748-38713549	13492	NM_013503	7.093	8.696	-1.604	0.329	1	0.002	2.006
481	A_52_P481538	NAP043091-1					8.771	10.377	-1.606	0.329	1	0.01435	-1.001
482	A_51_P417998	Sytl4	synaptotagmin-like 4	chrX:130470925-130516351	27359	NM_013757	6.729	8.338	-1.609	0.328	1	0.00164	2.393
483	A_51_P279454	AK039163					7.333	8.943	-1.61	0.328	1	0.01297	-0.857
484	A_52_P1195836	AK033859					6.424	8.035	-1.611	0.327	1	0.00959	-0.427
485	A_51_P106000	C530008M17Rik	RIKEN cDNA C530008M17 gene	chr5:77181393-77302570	320827		10.132	11.744	-1.611	0.327	1	0.00164	2.394
486	A_51_P307917	Tmem179	transmembrane protein 179	chr12:113738403-113749338	100047659, 104885	NM_178915	13.151	14.764	-1.613	0.327	1	0.02309	-1.648
487	A_52_P519737	Scml4	sex comb on midleg-like 4 (Drosophila)	chr10:42580473-42680584	268297	NM_172938	6.685	8.299	-1.614	0.327	1	0.0017	2.307
488	A_52_P389324	B230215L15Rik*	RIKEN cDNA B230215L15 gene				11.361	12.976	-1.616	0.326	1	0.00186	2.147
489	A_52_P907393	AK045692					7.321	8.938	-1.617	0.326	1	0.0399	-2.369
490	A_51_P182131	5330417C22Rik	RIKEN cDNA 5330417C22 gene	chr3:108260987-108339444	229722	NM_001033304	9.217	10.835	-1.617	0.326	1	0.00212	1.933
491	A_51_P296846	Mpped1	metallophosphoesterase domain containing 1	chr15:83609897-83688914	223726	NM_172610	11.616	13.234	-1.617	0.326	1	0.04513	-2.533
492	A_51_P502713	Vwc2	von Willebrand factor C domain containing 2	chr11:11014226-11167726	319922		7.368	8.986	-1.618	0.326	1	0.00393	0.925
493	A_51_P462658	Kcnk4*	potassium channel, subfamily K, member 4				9.102	10.724	-1.621	0.325	1	0.00663	0.116
494	A_51_P330537	C130026L21Rik*	RIKEN cDNA C130026L21 gene				5.873	7.495	-1.621	0.325	0.9197	0.00136	2.712
495	A_52_P514391	Ccnd2*	cyclin D2				9.181	10.804	-1.623	0.325	1	0.00251	1.669
496	A_52_P235448	BC030500	cDNA sequence BC030500	chr8:61390552-61393093	234290	NM_173411	7.232	8.856	-1.624	0.324	1	0.00355	1.096
497	A_51_P469285	Nrp1	neuropilin 1	chr8:130883148-131027247	18186	NM_008737	7.078	8.704	-1.626	0.324	1	0.00254	1.644
498	A_52_P1197577	TC1674606					9.553	11.18	-1.627	0.324	1	0.00919	-0.361
499	A_51_P459477	Col11a1	procollagen, type XI, alpha 1	chr3:113733458-113923244	12814	NM_007729	8.724	10.352	-1.628	0.324	1	0.00851	-0.246
500	A_51_P104802	Lingo1	leucine rich repeat and Ig domain containing 1	chr9:56466282-56533060	235402	NM_181074	9.856	11.484	-1.628	0.324	1	0.00217	1.892
501	A_52_P126663	Tshz2*	teashirt zinc finger family member 2				8.019	9.648	-1.629	0.323	1	0.01947	-1.417
502	A_52_P561746	Arhgap6	Rho GTPase activating protein 6	chrX:165234153-165742367	11856	NM_009707, NM_178754	7.975	9.605	-1.63	0.323	0.69941	0.00116	2.972
503	A_52_P306608	D930044I17Rik*	RIKEN cDNA D930044I17 gene				5.862	7.492	-1.631	0.323	1	0.00769	-0.095
504	A_51_P427823	2310046A06Rik	RIKEN cDNA 2310046A06 gene	chr9:76949893-77195647	69642		10.145	11.776	-1.631	0.323	1	0.00566	0.354
505	A_51_P433228	Ccnd2	cyclin D2	chr6:127080253-127101046	12444	NM_009829	9.713	11.345	-1.632	0.323	1	0.00615	0.228
506	A_52_P248013	4833446K15Rik (Chsy3)	RIKEN cDNA 4833446K15 gene	chr18:59335331-59570100	78923	NM_001081328	6.468	8.1	-1.632	0.323	1	0.01308	-0.869
507	A_51_P135340	Panx1	pannexin 1	chr9:14810231-14849904	55991	NM_019482	11.096	12.731	-1.635	0.322	1	0.01752	-1.276
508	A_51_P367780	Adamtsl2	ADAMTS-like 2	chr2:26934899-26964495	77794	NM_029981	6.439	8.077	-1.637	0.321	1	0.00187	2.135
509	A_52_P102432	Dsg1c*	desmoglein 1 gamma				5.119	6.757	-1.638	0.321	1	0.0029	1.406
510	A_52_P358651	Chrnb3	cholinergic receptor, nicotinic, beta polypeptide 3	chr8:28479183-28510201	108043	NM_173212, NM_027454	4.815	6.453	-1.638	0.321	0.06818	0.00043	5.178
511	A_51_P230287	Sorcs2	sortilin-related VPS10 domain containing receptor 2	chr5:36359829-36740788	81840	NM_030889	10.411	12.049	-1.638	0.321	1	0.00169	2.315
512	A_51_P199041	Adcy5	adenylate cyclase 5	chr16:35154963-35305823	100047385, 224129	NM_001012765	8.855	10.494	-1.639	0.321	1	0.00784	-0.125
513	A_51_P327011	Pde1a	phosphodiesterase 1A, calmodulin-dependent	chr2:79674611-79969615	18573	NM_016744, NM_001009979, NM_001009978	7.639	9.278	-1.639	0.321	1	0.01628	-1.173
514	A_52_P520037	Rimbp2*	RIMS binding protein 2				10.312	11.952	-1.64	0.321	1	0.00172	2.266
515	A_51_P510418	Aldh1b1	aldehyde dehydrogenase 1 family, member B1	chr4:45811993-45817473	72535	NM_028270	7.984	9.624	-1.641	0.321	1	0.00371	1.033
516	A_51_P373082	Bok	Bcl-2-related ovarian killer protein	chr1:95582333-95592339	51800	NM_016778	13.58	15.223	-1.643	0.32	0.88869	0.00133	2.745
517	A_51_P339417	Heyl	hairy/enhancer-of-split related with YRPW motif-like	chr4:122910799-122927113	56198	NM_013905	7.812	9.457	-1.645	0.32	1	0.00326	1.226
518	A_51_P152623	Mas1	MAS1 oncogene	chr17:13033943-13061009	17171, 100048871	NM_008552	5.792	7.439	-1.647	0.319	1	0.0487	-2.629
519	A_51_P261544	ENSMUST00000024247	Putative uncharacterized protein Fragment [Source:UniProtKB/TrEMBL;Acc:Q9CVQ7]	chr14:80169715-80172549			6.632	8.283	-1.651	0.318	1	0.00198	2.019
520	A_51_P218345	Pak3	p21 (CDKN1A)-activated kinase 3	chrX:139953134-140232335	18481	NM_008778	11.205	12.857	-1.652	0.318	1	0.00158	2.447
521	A_52_P314370	Mgat4c	mannosyl (alpha-1,3-)-glycoprotein beta-1,4-N-acetylglucosaminyltransferase, isozyme C (putative)	chr10:101621713-101853950	67569	NM_026243	7.723	9.376	-1.653	0.318	1	0.00171	2.298
522	A_51_P460734	Prkcd	protein kinase C, delta	chr14:31408544-31439396	18753	NM_011103	12.938	14.593	-1.655	0.318	1	0.01514	-1.082
523	A_52_P686322	1600002O04Rik (Hhipl1)	RIKEN cDNA 1600002O04 gene	chr12:109544585-109567776	214305	NM_001044380	7.096	8.751	-1.656	0.317	1	0.00489	0.577
524	A_52_P493857	Kctd4	potassium channel tetramerisation domain containing 4	chr14:76354810-76365024	67516	NM_026214	7.553	9.209	-1.656	0.317	1	0.00257	1.629
525	A_51_P125607	Brunol5	bruno-like 5, RNA binding protein (Drosophila)	chr10:80921972-80945454	319586		8.131	9.787	-1.656	0.317	1	0.03072	-2.029
526	A_51_P450469	Pnoc	prepronociceptin	chr14:66019510-66044046	18155	NM_010932	11.31	12.967	-1.656	0.317	1	0.0047	0.637
527	A_51_P371034	Rgs9	regulator of G-protein signaling 9	chr11:109086669-109159443	19739	NM_011268	9.391	11.053	-1.661	0.316	1	0.03533	-2.213
528	A_51_P151316	Gabra5	gamma-aminobutyric acid (GABA-A) receptor, subunit alpha 5	chr7:64663060-64765379	110886	NM_176942	7.532	9.194	-1.662	0.316	1	0.02231	-1.602
529	A_52_P1042732	3526401B18Rik*	RIKEN cDNA 3526401B18 gene				9.357	11.02	-1.663	0.316	1	0.00461	0.676
530	A_52_P671402	Rab27b	RAB27b, member RAS oncogene family	chr18:70138785-70301259	80718	NM_030554, NM_001082553	6.825	8.488	-1.663	0.316	1	0.02818	-1.917
531	A_52_P451485	Cobl	cordon-bleu	chr11:12136679-12364862	12808	NM_172496	9.88	11.543	-1.664	0.316	1	0.00386	0.955
532	A_51_P407780	Ly6h	lymphocyte antigen 6 complex, locus H	chr15:75395177-75397289	100046207, 23934	NM_011837	11.322	12.989	-1.667	0.315	1	0.00459	0.681
533	A_51_P518600	Atp6v1c2	ATPase, H+ transporting, lysosomal V1 subunit C2	chr12:17291529-17331509	68775	NM_133699	6.904	8.571	-1.667	0.315	1	0.00608	0.248
534	A_51_P283516	Sox11	SRY-box containing gene 11	chr12:28019129-28027439	20666	NM_009234	7.643	9.31	-1.668	0.315	0.01622	0.00032	6.53
535	A_51_P108266	Actn2	actinin alpha 2	chr13:12361696-12432999	11472	NM_033268	7.119	8.788	-1.668	0.315	1	0.00749	-0.057
536	A_51_P300456	Pxdn	peroxidasin homolog (Drosophila)	chr12:30622901-30702523	69675	NM_181395	8.131	9.8	-1.669	0.315	1	0.00315	1.272
537	A_52_P38908	Tmem132b*	transmembrane protein 132B				7.857	9.527	-1.669	0.314	1	0.03905	-2.34
538	A_51_P196390	Alk	anaplastic lymphoma kinase	chr17:72218328-72953049	11682	NM_007439	8.408	10.077	-1.669	0.314	1	0.01985	-1.443
539	A_52_P167357	Rab40b	Rab40b, member RAS oncogene family	chr11:121217440-121249559	217371	NM_139147	8.89	10.56	-1.67	0.314	1	0.00393	0.928
540	A_52_P311022	Gfra1	glial cell line derived neurotrophic factor family receptor alpha 1	chr19:58310119-58529807	14585	NM_010279	7.442	9.113	-1.671	0.314	1	0.03258	-2.103
541	A_52_P747196	AK048779					6.69	8.361	-1.672	0.314	1	0.01755	-1.279
542	A_51_P221762	Epha4	Eph receptor A4	chr1:77363760-77511663	13838	NM_007936	8.143	9.814	-1.672	0.314	0.65112	0.00113	3.04
543	A_52_P553421	9330132A10Rik*	RIKEN cDNA 9330132A10 gene				8.256	9.929	-1.673	0.314	1	0.00342	1.157
544	A_51_P504438	AK043711					5.589	7.263	-1.674	0.313	1	0.00343	1.152
545	A_51_P511511	Stk33	serine/threonine kinase 33	chr7:116422735-116582595	117229		8.077	9.753	-1.677	0.313	0.61825	0.0011	3.09
546	A_52_P78439	Pcdh10*	protocadherin 10				9.159	10.837	-1.677	0.313	0.58403	0.00107	3.144
547	A_51_P111233	Drd2	dopamine receptor 2	chr9:49148732-49216282	13489	NM_010077	8.446	10.124	-1.678	0.313	1	0.00964	-0.436
548	A_51_P492707	Ptpro (Ptpro, Ptpn15)	protein tyrosine phosphatase, receptor type, O	chr6:137200986-137411751	19277	NM_011216	10.5	12.178	-1.679	0.312	1	0.00384	0.965
549	A_52_P265358	Igsf1	immunoglobulin superfamily, member 1	chrX:47135713-47150926	209268	NM_177591, NM_183336, NM_183335, NM_177915	6.883	8.562	-1.679	0.312	1	0.00225	1.842
550	A_52_P63718	Mrcl	mannose receptor-like precursor	chr8:113582820-113605988			6.112	7.794	-1.682	0.312	1	0.00253	1.653
551	A_51_P227353	Creg2	cellular repressor of E1A-stimulated genes 2	chr1:39675251-39708027	263764	NM_170597	9.401	11.083	-1.682	0.312	1	0.00907	-0.342
552	A_51_P355852	Prkch	protein kinase C, eta	chr12:74685783-74879163	18755	NM_008856	6.458	8.147	-1.688	0.31	1	0.00258	1.624
553	A_51_P509643	Snca	synuclein, alpha	chr6:60681573-60778833	20617	NM_009221, NM_001042451	13.472	15.161	-1.689	0.31	0.01501	0.00032	6.603
554	A_51_P167803	Pde1b	phosphodiesterase 1B, Ca2+-calmodulin dependent	chr15:103333729-103360483	18574	NM_008800	13.338	15.027	-1.689	0.31	1	0.0032	1.251
555	A_51_P264495	Pgam2	phosphoglycerate mutase 2	chr11:5701646-5703725	56012	NM_018870	8.616	10.307	-1.691	0.31	1	0.00808	-0.172
556	A_51_P453818	C230098O21Rik*	RIKEN cDNA C230098O21 gene				11.205	12.897	-1.693	0.309	1	0.00787	-0.137
557	A_51_P327141	Zap70	zeta-chain (TCR) associated protein kinase	chr1:36818706-36839661	22637	NM_009539	7.863	9.556	-1.693	0.309	0.44125	0.00091	3.41
558	A_52_P818	AK043184					7.956	9.649	-1.693	0.309	1	0.00522	0.474
559	A_51_P309850	Ephb6	Eph receptor B6	chr6:41555567-41570501	13848	NM_007680	8.232	9.927	-1.695	0.309	1	0.00389	0.942
560	A_51_P497295	Qpct	glutaminyl-peptide cyclotransferase (glutaminyl cyclase)	chr17:79451246-79489583	70536	NM_027455	9.987	11.682	-1.695	0.309	1	0.00219	1.878
561	A_52_P867723	AK083893					7.06	8.755	-1.695	0.309	1	0.00512	0.506
562	A_51_P384515	Indol1*	indoleamine-pyrrole 2,3 dioxygenase-like 1				7.896	9.593	-1.697	0.308	1	0.00506	0.521
563	A_52_P466615	Prkg2	protein kinase, cGMP-dependent, type II	chr5:99360287-99466098	19092	NM_008926	6.435	8.135	-1.7	0.308	1	0.00196	2.055
564	A_51_P353543	Magee2	melanoma antigen, family E, 2	chrX:102050291-102052606	272790	NM_053206	7.171	8.873	-1.702	0.307	1	0.00548	0.407
565	A_51_P237374	2900093B09Rik (Vstm2b)	RIKEN cDNA 2900093B09 gene	chr7:48154648-48185318	100045106, 58188	NM_021387	8.352	10.057	-1.704	0.307	1	0.00186	2.144
566	A_52_P365633	A830041P22Rik (Tmem91)	RIKEN cDNA A830041P22 gene	chr7:26454161-26460185	320208	NM_177102	11.052	12.758	-1.706	0.306	1	0.00701	0.033
567	A_51_P327016	Pde1a	phosphodiesterase 1A, calmodulin-dependent	chr2:79674611-79969615	18573	NM_016744, NM_001009979, NM_001009978	9.683	11.396	-1.713	0.305	1	0.04492	-2.527
568	A_51_P140237	Fhl2	four and a half LIM domains 2	chr1:43179919-43220714	14200	NM_010212	10.139	11.853	-1.714	0.305	1	0.0115	-0.682
569	A_51_P490747	AI593442*	expressed sequence AI593442				12.237	13.951	-1.715	0.305	0.19312	0.00063	4.193
570	A_51_P313925	Trhr	thyrotropin releasing hormone receptor	chr15:44027779-44067458	22045	NM_013696	6.977	8.692	-1.716	0.304	1	0.00977	-0.454
571	A_52_P213550	Chrna5	cholinergic receptor, nicotinic, alpha polypeptide 5	chr9:54828904-54854632	110835		5.544	7.26	-1.716	0.304	1	0.00696	0.042
572	A_51_P452203	Vash2	vasohibin 2	chr1:192771636-192803083	226841		6.864	8.58	-1.716	0.304	1	0.0055	0.403
573	A_52_P842949	LOC626082*	hypothetical protein LOC626082				5.196	6.913	-1.717	0.304	1	0.00497	0.553
574	A_51_P502357	A230106N23Rik	RIKEN cDNA A230106N23 gene	chr1:157923096-158135156	329274	NM_177838	9.653	11.371	-1.718	0.304	1	0.00793	-0.149
575	A_51_P148684	Pou6f2	POU domain, class 6, transcription factor 2	chr13:18216794-18473880	218030		7.795	9.514	-1.719	0.304	1	0.00395	0.916
576	A_51_P478172	Tcrb-V13	T-cell receptor beta, variable 13	chr6:41496729-41498180			7.783	9.502	-1.72	0.304	1	0.01062	-0.572
577	A_52_P1043586	ENSMUSG00000053980*	predicted gene, ENSMUSG00000053980				5.6	7.32	-1.72	0.304	1	0.00339	1.173
578	A_52_P233279	Vwc2	von Willebrand factor C domain containing 2	chr11:11014226-11167726	319922		9.945	11.665	-1.72	0.303	0.71912	0.00119	2.946
579	A_52_P964088	AK081376					6.966	8.688	-1.721	0.303	1	0.02028	-1.477
580	A_52_P843948	ENSMUSG00000045946*	predicted gene, ENSMUSG00000045946				5.714	7.437	-1.723	0.303	1	0.02943	-1.974
581	A_52_P479444	C630007B19Rik	RIKEN cDNA C630007B19 gene	chr6:96063148-96607192	320265	NM_182808	6.772	8.497	-1.725	0.302	1	0.00656	0.133
582	A_52_P287692	Stk32c	serine/threonine kinase 32C	chr7:146289538-146374372	57740	NM_021302	7.57	9.297	-1.727	0.302	1	0.00955	-0.42
583	A_52_P517470	TC1645789					6.266	7.997	-1.731	0.301	0.73986	0.0012	2.919
584	A_51_P417643	Foxa1	forkhead box A1	chr12:58641618-58647108	100047556, 15375	NM_008259	6.046	7.778	-1.732	0.301	1	0.00226	1.832
585	A_52_P47781	Slitrk3	SLIT and NTRK-like family, member 3	chr3:72852048-72860865	386750	NM_198864	9.471	11.203	-1.732	0.301	1	0.00382	0.97
586	A_52_P306236	Epha7*	Eph receptor A7				8.84	10.572	-1.732	0.301	0.27742	0.00073	3.85
587	A_51_P262563	Tmem10*	transmembrane protein 10				6.281	8.013	-1.732	0.301	0.31468	0.00078	3.731
588	A_51_P338878	P2ry12	purinergic receptor P2Y, G-protein coupled 12	chr3:59020196-59066747	70839	NM_027571	9.372	11.105	-1.732	0.301	1	0.00172	2.28
589	A_52_P963482	AK042944					6.199	7.932	-1.733	0.301	1	0.00861	-0.264
590	A_52_P116006	Gda	guanine deaminase	chr19:21465797-21547935	14544	NM_010266	6.022	7.758	-1.736	0.3	1	0.00663	0.116
591	A_52_P437792	A730017C20Rik	RIKEN cDNA A730017C20 gene	chr18:59221902-59236616	225583	NM_173759	10.79	12.527	-1.737	0.3	1	0.00766	-0.09
592	A_51_P512859	Atbf1 (Zfhx3)	AT motif binding factor 1	chr8:111238544-111485521	11906	NM_007496	8.605	10.345	-1.74	0.299	1	0.01312	-0.873
593	A_52_P509421	Kcnt2	potassium channel, subfamily T, member 2	chr1:142142793-142508640	240776		6.425	8.167	-1.743	0.299	1	0.00172	2.278
594	A_52_P629112	(Pak3)	p21 (CDKN1A)-activated kinase 3 Gene [Source:MGI (curated);Acc:Pak3-008]	chrX:139953134-140232335	18481	NM_008778	11.403	13.147	-1.744	0.299	0.21277	0.00064	4.101
595	A_51_P174264	4932409I22Rik	RIKEN cDNA 4932409I22 gene	chr10:79069602-79076745	237397	NM_198614	7.339	9.086	-1.747	0.298	0.41037	0.00087	3.478
596	A_52_P50325	Arhgdig	Rho GDP dissociation inhibitor (GDI) gamma	chr17:26336128-26338314	14570	NM_008113	11.714	13.464	-1.749	0.297	1	0.01156	-0.693
597	A_52_P519924	St6gal2*	beta galactoside alpha 2,6 sialyltransferase 2				6.044	7.796	-1.752	0.297	1	0.00254	1.648
598	A_52_P234127	Odz3*	odd Oz/ten-m homolog 3 (Drosophila)				10.279	12.032	-1.753	0.297	0.9766	0.00141	2.655
599	A_51_P343474	Krt2	keratin 2	chr15:101641121-101648600	16681	NM_010668	4.992	6.746	-1.754	0.296	1	0.01251	-0.803
600	A_52_P723367	AK044498					6.258	8.015	-1.757	0.296	1	0.00224	1.849
601	A_51_P227090	Ramp3	receptor (calcitonin) activity modifying protein 3	chr11:6558568-6577475	56089	NM_019511	12.586	14.343	-1.757	0.296	0.15747	0.00057	4.386
602	A_52_P142770	Efcab1	EF hand calcium binding domain 1	chr16:14906730-14925972	66793	NM_025769	8.025	9.784	-1.759	0.295	1	0.00195	2.058
603	A_52_P46102	Pde1a	phosphodiesterase 1A, calmodulin-dependent	chr2:79674611-79969615	18573	NM_016744, NM_001009979, NM_001009978	8.222	9.981	-1.759	0.295	1	0.02575	-1.79
604	A_51_P152073	Lrrtm1	leucine rich repeat transmembrane neuronal 1	chr6:77192684-77207787	74342	NM_028880	9.075	10.834	-1.759	0.295	1	0.01586	-1.139
605	A_51_P119387	Tm4sf5	transmembrane 4 superfamily member 5	chr11:70318779-70324674	75604	NM_029360	7.132	8.893	-1.761	0.295	1	0.00535	0.443
606	A_52_P195640	AW551984	expressed sequence AW551984	chr9:39394981-39411709	244810	NM_178737	8.186	9.949	-1.763	0.295	1	0.02816	-1.916
607	A_51_P337230	Galnt14	UDP-N-acetyl-alpha-D-galactosamine:polypeptide N-acetylgalactosaminyltransferase 14	chr17:73842568-74059736	71685	NM_027864	11.123	12.889	-1.766	0.294	1	0.00459	0.682
608	A_52_P589391	Doc2a (Ino80e| Doc2a)	double C2, alpha	chr7:133995094-134005876| 7:133991067-133996217	233875| 13446	NM_153580| NM_010069	10.257	12.025	-1.768	0.294	1	0.01639	-1.183
609	A_52_P322181	Adrb1*	adrenergic receptor, beta 1				9.33	11.099	-1.768	0.294	0.08454	0.00046	4.975
610	A_51_P407786	Ly6h	lymphocyte antigen 6 complex, locus H	chr15:75395177-75397289	100046207, 23934	NM_011837	11.981	13.749	-1.769	0.293	1	0.0032	1.25
611	A_51_P439210	Kcnh5	potassium voltage-gated channel, subfamily H (eag-related), member 5	chr12:75998207-76278319	238271	NM_172805	7.789	9.558	-1.769	0.293	1	0.00731	-0.023
612	A_51_P383369	Odz3	odd Oz/ten-m homolog 3 (Drosophila)	chr8:49313036-49929268	23965	NM_011857	10.178	11.947	-1.769	0.293	0.27652	0.00073	3.853
613	A_51_P192585	5830474E16Rik*	RIKEN cDNA 5830474E16 gene				7	8.77	-1.77	0.293	1	0.00444	0.735
614	A_52_P213722	Rnf207	ring finger protein 207	chr4:151681132-151692717	433809		7.964	9.735	-1.771	0.293	1	0.0029	1.4
615	A_51_P375987	Fign	fidgetin	chr2:63815418-63936069	60344	NM_021716	9.287	11.062	-1.775	0.292	1	0.00372	1.027
616	A_51_P114826	Cdh13	cadherin 13	chr8:120807633-121848821	12554		12.056	13.831	-1.775	0.292	1	0.01333	-0.897
617	A_52_P49518	Otof	otoferlin	chr5:30669355-30764275	83762	NM_031875	6.903	8.678	-1.775	0.292	1	0.00523	0.471
618	A_52_P947534	C77370	expressed sequence C77370	chrX:101272773-101396524	245555		9.047	10.823	-1.776	0.292	0.00542	0.00021	7.557
619	A_51_P231597	E130310K16Rik (Nkain3)	RIKEN cDNA E130310K16 gene	chr4:20046021-20705714	269513	NM_172987	8.196	9.973	-1.777	0.292	0.05751	0.00041	5.339
620	A_52_P586821	Gng4	guanine nucleotide binding protein (G protein), gamma 4 subunit	chr13:13876806-13920160	14706	NM_010317	7.083	8.869	-1.786	0.29	1	0.00434	0.771
621	A_52_P95759	Sh3md4 (Sh3rf3)	SH3 multiple domains 4	chr10:58276851-58601661	237353		7.795	9.582	-1.786	0.29	0.33898	0.00079	3.66
622	A_52_P562641	Ier5l	immediate early response 5-like	chr2:30327057-30329739	72500	NM_030244	8.279	10.068	-1.789	0.289	0.207	0.00064	4.128
623	A_51_P199494	Cacna2d4*	calcium channel, voltage-dependent, alpha 2/delta subunit 4				5.86	7.649	-1.789	0.289	0.37837	0.00084	3.556
624	A_52_P17446	TC1662444					9.28	11.07	-1.79	0.289	1	0.00372	1.026
625	A_52_P242544	Dsp*	desmoplakin	chr13:38288353-38290444	109620		7.981	9.773	-1.793	0.289	1	0.01751	-1.273
626	A_51_P114817	Ccna1	cyclin A1	chr3:54849399-54858964	12427	NM_007628	6.336	8.129	-1.793	0.289	0.03359	0.00038	5.846
627	A_52_P228899	Scn3b	sodium channel, voltage-gated, type III, beta	chr9:40076802-40099202	235281	NM_153522, NM_178227, NM_001083917	6.66	8.456	-1.797	0.288	1	0.0028	1.469
628	A_52_P398998	Gfra1	glial cell line derived neurotrophic factor family receptor alpha 1	chr19:58310119-58529807	14585	NM_010279	7.304	9.102	-1.797	0.288	1	0.00234	1.787
629	A_51_P333441	Grm5	glutamate receptor, metabotropic 5	chr7:94750952-95282640	108071	NM_001081414	7.149	8.949	-1.799	0.287	0.67679	0.00115	3.004
630	A_52_P190855	B230218L05Rik (Ankrd34c)	RIKEN cDNA B230218L05 gene	chr9:89623087-89633313	330998	NM_207260	6.965	8.764	-1.8	0.287	1	0.00604	0.256
631	A_51_P495269	Lor	loricrin	chr3:91884197-91887064	16939	NM_008508	10.188	11.99	-1.802	0.287	1	0.01424	-0.988
632	A_52_P95294	TC1685221					8.981	10.786	-1.805	0.286	1	0.00371	1.033
633	A_51_P105068	2310010M24Rik (Lypd6b)	RIKEN cDNA 2310010M24 gene	chr2:49643206-49804366	71897	NM_027990	10.629	12.434	-1.805	0.286	1	0.01469	-1.036
634	A_51_P361340	Nppa	natriuretic peptide precursor type A	chr4:147374852-147376140	230899	NM_008725	5.715	7.524	-1.809	0.285	0.06234	0.00041	5.263
635	A_51_P352216	Zfp365	zinc finger protein 365	chr10:67348855-67375410	216049	NM_178679	10.05	11.86	-1.809	0.285	1	0.00436	0.763
636	A_52_P250400	Pcdh20	protocadherin 20	chr14:88865864-88871203	219257	NM_178685	10.053	11.863	-1.81	0.285	0.0337	0.00038	5.843
637	A_51_P369998	Sntg2	syntrophin, gamma 2	chr12:30859422-31058199	268534	NM_172951	6.764	8.578	-1.814	0.284	0.01953	0.00033	6.356
638	A_52_P963665	AK049947					6.424	8.24	-1.815	0.284	1	0.00387	0.951
639	A_51_P201187	Pllp	plasma membrane proteolipid	chr8:97199344-97220130	67801	NM_026385	9.33	11.149	-1.819	0.284	1	0.0267	-1.84
640	A_52_P523399	Six6os1	Six6 opposite strand transcript 1	chr12:73982096-74018752	75801	NM_029444	7.259	9.078	-1.819	0.283	1	0.0049	0.573
641	A_51_P410772	Rhcg	Rhesus blood group-associated C glycoprotein	chr7:86738255-86762543	56315	NM_019799	6.854	8.673	-1.82	0.283	1	0.01099	-0.62
642	A_52_P494168	9630019K15Rik (Prr18)	RIKEN cDNA 9630019K15 gene	chr17:8533271-8536977	320111, 100044807	NM_178774	10.034	11.856	-1.822	0.283	0.12807	0.00052	4.582
643	A_52_P988322	AK082037					7.347	9.171	-1.824	0.282	1	0.01065	-0.576
644	A_51_P424471	Cnih3	cornichon homolog 3 (Drosophila)	chr1:183282761-183390755	72978	NM_028408	8.835	10.66	-1.825	0.282	1	0.00653	0.141
645	A_51_P132530	Cldn22	claudin 22	chr8:48909836-48910829	75677		5.92	7.749	-1.829	0.282	1	0.04468	-2.519
646	A_52_P193429	Atbf1 (Zfhx3)	AT motif binding factor 1	chr8:111238544-111485521	11906	NM_007496	9.762	11.591	-1.83	0.281	1	0.01566	-1.124
647	A_51_P504494	Dll3	delta-like 3 (Drosophila)	chr7:29076673-29086804	13389	NM_007866	8.558	10.394	-1.836	0.28	1	0.00443	0.743
648	A_52_P597696	Nin	ninein	chr12:71112422-71212947	18080	NM_001081453, NM_008697	9.067	10.905	-1.838	0.28	0.02086	0.00034	6.294
649	A_52_P467488	Slc35d3	solute carrier family 35, member D3	chr10:19567723-19571265	76157	NM_029529	7.628	9.466	-1.838	0.28	1	0.00175	2.242
650	A_52_P367017	Grin2b	glutamate receptor, ionotropic, NMDA2B (epsilon 2)	chr6:135679844-136123529	14812	NM_008171	6.011	7.853	-1.842	0.279	0.14411	0.00054	4.47
651	A_51_P255853	Tal1	T-cell acute lymphocytic leukemia 1	chr4:114729031-114744360	21349	NM_011527	9.361	11.207	-1.845	0.278	1	0.01469	-1.036
652	A_52_P102846	Tcrb-V13*	T-cell receptor beta, variable 13				8.175	10.021	-1.846	0.278	1	0.00932	-0.383
653	A_52_P305658	Ntng1	netrin G1	chr3:109584027-109938426	80883	NM_030699	6.477	8.324	-1.847	0.278	1	0.00173	2.261
654	A_51_P388819	Hpcal4	hippocalcin-like 4	chr4:122860482-122871942	170638		10.68	12.529	-1.849	0.278	1	0.00417	0.829
655	A_51_P338235	AK049941					9.452	11.301	-1.85	0.277	1	0.00496	0.556
656	A_52_P803797	AK085108					6.58	8.433	-1.853	0.277	1	0.00884	-0.306
657	A_52_P424655	AK039674					6.421	8.278	-1.857	0.276	1	0.04225	-2.444
658	A_52_P447567	5330417C22Rik*	RIKEN cDNA 5330417C22 gene				8.332	10.19	-1.858	0.276	1	0.00235	1.779
659	A_52_P100484	Epha5	Eph receptor A5	chr5:84486816-84846407	13839	NM_007937	10.477	12.338	-1.861	0.275	1	0.00434	0.772
660	A_52_P178018	Sox11	SRY-box containing gene 11	chr12:28019129-28027439	20666	NM_009234	7.391	9.255	-1.864	0.275	0.00146	0.00018	8.783
661	A_51_P199725	Arhgap24	Rho GTPase activating protein 24	chr5:102910410-103326848	231532	NM_029270, NM_146161	10.317	12.183	-1.866	0.274	1	0.00465	0.656
662	A_51_P338935	Prkcq	protein kinase C, theta	chr2:11093740-11222853	18761	NM_008859	8.136	10.005	-1.869	0.274	0.56625	0.00105	3.173
663	A_52_P216672	Klk8	kallikrein related-peptidase 8	chr7:51052947-51059192	259277	NM_008940	8.143	10.014	-1.871	0.273	1	0.00635	0.183
664	A_51_P194853	Sec14l4	SEC14-like 4 (S. cerevisiae)	chr11:3931785-3948010	103655	NM_146013	7.171	9.054	-1.883	0.271	1	0.02749	-1.881
665	A_52_P432969	Pcdh19	protocadherin 19	chrX:130122164-130221803	279653	NM_001105245	11.046	12.934	-1.888	0.27	1	0.00197	2.036
666	A_51_P181341	Efcbp2 (Necab2)	EF hand calcium binding protein 2	chr8:121970955-121996533	117148	NM_054095	13.602	15.49	-1.888	0.27	1	0.01356	-0.921
667	A_52_P132074	D0Kist2 (D0Kist4)	DNA segment, KIST 2	chr7:68234469-68366851	27493		8.301	10.189	-1.888	0.27	1	0.03254	-2.101
668	A_52_P580582	Nppa	natriuretic peptide precursor type A	chr4:147374852-147376140	230899	NM_008725	7.714	9.602	-1.889	0.27	0.11162	0.0005	4.712
669	A_51_P352303	Homer2	homer homolog 2 (Drosophila)	chr7:88754616-88851830	26557	NM_011983	9.096	10.988	-1.892	0.269	1	0.00188	2.119
670	A_51_P249286	Rgs16	regulator of G-protein signaling 16	chr1:155587478-155592594	19734	NM_011267	11.223	13.115	-1.892	0.269	1	0.00265	1.568
671	A_51_P280384	Cacna1h	calcium channel, voltage-dependent, T type, alpha 1H subunit	chr17:25511232-25570728	58226	NM_021415	7.727	9.621	-1.894	0.269	1	0.0149	-1.06
672	A_52_P181394	Grm5	glutamate receptor, metabotropic 5	chr7:94750952-95282640	108071	NM_001081414	8.243	10.136	-1.894	0.269	1	0.01303	-0.863
673	A_52_P29987	Prickle2	prickle-like 2 (Drosophila)	chr6:92320902-92656139	243548	NM_001081146	10.088	11.985	-1.897	0.269	1	0.00463	0.666
674	A_51_P266579	Kctd16	potassium channel tetramerisation domain containing 16	chr18:40418015-40690757	383348		7.346	9.248	-1.903	0.267	1	0.02069	-1.502
675	A_51_P131235	Ptpn20	protein tyrosine phosphatase, non-receptor type 20	chr14:34402456-34453940	19256	NM_008978	5.676	7.583	-1.907	0.267	0.63705	0.00112	3.061
676	A_51_P101065	Htr7	5-hydroxytryptamine (serotonin) receptor 7	chr19:36033224-36131850	15566	NM_008315	7.347	9.255	-1.908	0.266	1	0.02319	-1.654
677	A_51_P477682	Prss12	protease, serine, 12 neurotrypsin (motopsin)	chr3:123149831-123209510	19142	NM_008939	9.881	11.795	-1.914	0.265	1	0.01841	-1.341
678	A_51_P305508	Rerg	RAS-like, estrogen-regulated, growth-inhibitor	chr6:137003346-137119020	232441	NM_181988	9.467	11.388	-1.921	0.264	1	0.00558	0.375
679	A_52_P74229	(OTTMUSG00000002879)	predicted gene, OTTMUSG00000002879 Gene [Source:MGI Symbol;Acc:MGI:3650659]	chr11:102437712-102440775			8.48	10.401	-1.921	0.264	1	0.02263	-1.622
680	A_52_P301139	AK051906					7.54	9.467	-1.926	0.263	1	0.00908	-0.346
681	A_52_P400355	3110035E14Rik	RIKEN cDNA 3110035E14 gene	chr1:9591501-9617205	76982	NM_178399	10.214	12.143	-1.929	0.263	1	0.01145	-0.675
682	A_52_P405708	Dcc*	deleted in colorectal carcinoma				7.1	9.03	-1.93	0.262	1	0.00169	2.319
683	A_52_P368310	E130310K16Rik*	RIKEN cDNA E130310K16 gene				7.056	8.99	-1.934	0.262	0.0406	0.00038	5.667
684	A_52_P154877	Fgf13	fibroblast growth factor 13	chrX:56315322-56821248	14168	NM_010200	10.313	12.247	-1.934	0.262	1	0.00237	1.771
685	A_51_P471273	2900055J20Rik	RIKEN cDNA 2900055J20 gene	chr18:40416616-40417338			9.447	11.381	-1.935	0.262	1	0.00297	1.364
686	A_52_P472353	Odz2*	odd Oz/ten-m homolog 2 (Drosophila)				7.92	9.859	-1.939	0.261	1	0.01668	-1.207
687	A_52_P662179	Rorb	RAR-related orphan receptor beta	chr19:19005095-19185686	225998	NM_001043354, NM_146095	8.717	10.671	-1.954	0.258	0.66125	0.00114	3.026
688	A_52_P675611	Grm5	glutamate receptor, metabotropic 5	chr7:94750952-95282640	108071	NM_001081414	7.527	9.483	-1.956	0.258	1	0.00983	-0.463
689	A_52_P515629	Gpr83*	G protein-coupled receptor 83				7.598	9.555	-1.957	0.258	1	0.00704	0.027
690	A_51_P210350	Slc17a8	solute carrier family 17 (sodium-dependent inorganic phosphate cotransporter), member 8	chr10:89036766-89083998	216227	NM_182959	9.279	11.237	-1.957	0.257	1	0.00469	0.64
691	A_52_P1164632	AK086234					6.474	8.436	-1.962	0.257	1	0.00624	0.209
692	A_51_P124345	Cpne5	copine V	chr17:29293497-29374742	100048828, 240058	NM_153166	11.832	13.795	-1.963	0.256	1	0.0112	-0.649
693	A_51_P461416	Kcnq5	potassium voltage-gated channel, subfamily Q, member 5	chr1:21388484-21952023	226922	NM_023872	6.346	8.311	-1.965	0.256	1	0.00662	0.117
694	A_51_P442894	Aldh3b2	aldehyde dehydrogenase 3 family, member B2	chr19:3972328-3981647			6.659	8.626	-1.967	0.256	1	0.00221	1.869
695	A_52_P600600	Myo5b	myosin Vb	chr18:74602259-74931131	17919	NM_201600	7.615	9.585	-1.97	0.255	1	0.03395	-2.159
696	A_52_P1108451	AK083633					6.994	8.965	-1.971	0.255	1	0.00355	1.097
697	A_51_P179565	2010204K13Rik	RIKEN cDNA 2010204K13 gene	chrX:6989232-7000074			12.069	14.04	-1.971	0.255	1	0.00293	1.383
698	A_52_P589568	Foxo6	forkhead box O6	chr4:119939691-119959954	329934	NM_194060	9.772	11.746	-1.974	0.255	1	0.00152	2.519
699	A_52_P78291	Col25a1	procollagen, type XXV, alpha 1	chr3:129883809-130302795	77018	NM_198711, NM_029838	5.974	7.949	-1.976	0.254	1	0.00694	0.046
700	A_52_P778774	AK034056					8.51	10.493	-1.982	0.253	1	0.00907	-0.343
701	A_52_P220498	AK045858					8.096	10.078	-1.983	0.253	1	0.01029	-0.526
702	A_52_P655278	Mas1	MAS1 oncogene	chr17:13033943-13061009	17171, 100048871	NM_008552	5.525	7.51	-1.984	0.253	1	0.01896	-1.382
703	A_52_P496726	Rasd1	RAS, dexamethasone-induced 1	chr11:59776687-59778444	19416	NM_009026	8.662	10.647	-1.985	0.253	1	0.01821	-1.328
704	A_51_P110081	Dmrta2	doublesex and mab-3 related transcription factor like family A2	chr4:109650630-109656289	242620	NM_172296	6.05	8.035	-1.985	0.253	0.04914	0.00039	5.487
705	A_52_P25251	E130309F12Rik	RIKEN cDNA E130309F12 gene	chr4:49072334-49353133	272031	NM_178756	6.185	8.171	-1.985	0.253	0.13808	0.00053	4.511
706	A_52_P1171614	Pou4f1	POU domain, class 4, transcription factor 1	chr14:104861550-104867216	18996	NM_011143	5.667	7.658	-1.991	0.252	1	0.00197	2.034
707	A_51_P238165	(Sstr2)	somatostatin receptor 2 Gene [Source:MGI (curated);Acc:Sstr2-001]	chr11:113480790-113487209	20606		7.961	9.952	-1.991	0.252	1	0.00175	2.244
708	A_52_P156251	C630007B19Rik	RIKEN cDNA C630007B19 gene	chr6:96063148-96607192	320265	NM_182808	7.792	9.787	-1.995	0.251	1	0.01143	-0.673
709	A_51_P274259	Ak5	adenylate kinase 5	chr3:152125779-152331104	229949	NM_001081277	11.139	13.134	-1.995	0.251	1	0.00718	0
710	A_52_P326513	Kcna4	potassium voltage-gated channel, shaker-related subfamily, member 4	chr2:107130811-107138661	16492	NM_021275	9.359	11.355	-1.996	0.251	0.55243	0.00104	3.196
711	A_51_P167979	Kcnt2	potassium channel, subfamily T, member 2	chr1:142142793-142508640	240776		6.839	8.839	-2	0.25	1	0.0019	2.106
712	A_51_P367554	1700110M21Rik*	RIKEN cDNA 1700110M21 gene				5.166	7.167	-2	0.25	1	0.00347	1.132
713	A_51_P513311	Rxrg	retinoid X receptor gamma	chr1:169528515-169569754	20183	NM_009107	9.677	11.679	-2.001	0.25	1	0.00516	0.491
714	A_52_P387056	Creg2	cellular repressor of E1A-stimulated genes 2	chr1:39675251-39708027	263764	NM_170597	10.068	12.079	-2.011	0.248	1	0.01579	-1.134
715	A_52_P596595	Pnma2	paraneoplastic antigen MA2	chr14:67530090-67539860	239157	NM_175498	11.29	13.304	-2.014	0.248	1	0.00171	2.293
716	A_51_P323212	2700045P11Rik*	RIKEN cDNA 2700045P11 gene				8.934	10.948	-2.015	0.247	0.01484	0.00032	6.614
717	A_51_P156222	A930017N06Rik (Elfn1)	RIKEN cDNA A930017N06 gene	chr5:140383897-140450665	243312	NM_175522	9.198	11.216	-2.018	0.247	1	0.00653	0.143
718	A_52_P467398	9330168O09Rik*	RIKEN cDNA 9330168O09 gene				9.321	11.342	-2.02	0.246	1	0.00172	2.267
719	A_52_P67212	2900052N01Rik*	RIKEN cDNA 2900052N01 gene				8.915	10.936	-2.021	0.246	1	0.02251	-1.614
720	A_52_P656667	Dbpht2	DNA binding protein with his-thr domain	chr12:75398461-75401455	386753	NM_198866	6.726	8.747	-2.021	0.246	1	0.03824	-2.313
721	A_52_P401504	Thbs4	thrombospondin 4	chr13:93521546-93564713	21828	NM_011582	6.035	8.058	-2.023	0.246	1	0.00757	-0.073
722	A_51_P257541	E130309F12Rik	RIKEN cDNA E130309F12 gene	chr4:49072334-49353133	272031	NM_178756	6.697	8.721	-2.024	0.246	0.85774	0.00131	2.778
723	A_52_P460584	Tnfrsf25	tumor necrosis factor receptor superfamily, member 25	chr4:151490188-151494219	85030	NM_033042	7.814	9.839	-2.024	0.246	0.15345	0.00056	4.411
724	A_51_P259296	Lpl	lipoprotein lipase	chr8:71404454-71430831	669888, 16956	NM_008509	8.971	10.995	-2.025	0.246	1	0.02374	-1.688
725	A_52_P493854	Kctd4	potassium channel tetramerisation domain containing 4	chr14:76354810-76365024	67516	NM_026214	8.039	10.064	-2.025	0.246	1	0.00342	1.157
726	A_52_P66130	Myo5b	myosin Vb	chr18:74602259-74931131	17919	NM_201600	7.305	9.331	-2.026	0.245	1	0.031	-2.039
727	A_52_P915614	AK049042					7.539	9.566	-2.027	0.245	1	0.00407	0.874
728	A_52_P478394	Dleu7	deleted in lymphocytic leukemia, 7	chr14:62895068-62911800	239133	NM_173419	9.031	11.061	-2.03	0.245	1	0.00265	1.561
729	A_52_P53906	Ccnd2	cyclin D2	chr6:127080253-127101046	12444	NM_009829	9.562	11.592	-2.03	0.245	1	0.0025	1.674
730	A_52_P561073	Tox	thymocyte selection-associated HMG box gene	chr4:6614605-6917870	100044677, 252838	NM_145711	7.109	9.14	-2.031	0.245	0.07201	0.00043	5.126
731	A_52_P255406	Rxfp3*	relaxin family peptide receptor 3				6.86	8.896	-2.036	0.244	0.77762	0.00123	2.871
732	A_52_P425416	Pnoc	prepronociceptin	chr14:66019510-66044046	18155	NM_010932	9.044	11.086	-2.041	0.243	1	0.00206	1.973
733	A_52_P11920	Cpne5	copine V	chr17:29293497-29374742	100048828, 240058	NM_153166	7.63	9.671	-2.041	0.243	1	0.0144	-1.005
734	A_51_P170823	Ngef	neuronal guanine nucleotide exchange factor	chr1:89373415-89442633	53972		10.677	12.728	-2.051	0.241	1	0.00277	1.487
735	A_52_P157402	Ppm2c	protein phosphatase 2C, magnesium dependent, catalytic subunit	chr4:11885331-11893599	381511	NM_001033453	12.164	14.216	-2.052	0.241	0.08669	0.00046	4.951
736	A_52_P1188845	AK081277					7.02	9.073	-2.053	0.241	1	0.00242	1.727
737	A_51_P356045	Baiap3	BAI1-associated protein 3	chr17:25379605-25389080	545192		11.537	13.595	-2.058	0.24	1	0.01528	-1.094
738	A_51_P152990	Grem2	gremlin 2 homolog, cysteine knot superfamily (Xenopus laevis)	chr1:176763916-176851950	23893	NM_011825	9.703	11.773	-2.07	0.238	1	0.00515	0.496
739	A_51_P377528	Oprk1	opioid receptor, kappa 1	chr1:5578574-5592947	18387	NM_011011	7.556	9.629	-2.072	0.238	1	0.00568	0.348
740	A_52_P149545	Tacr1	tachykinin receptor 1	chr6:82352469-82510092	21336	NM_009313	7.625	9.698	-2.073	0.238	1	0.00923	-0.368
741	A_51_P224903	Rgs4	regulator of G-protein signaling 4	chr1:171671807-171677773	19736	NM_009062	7.775	9.849	-2.073	0.238	1	0.0024	1.747
742	A_51_P104487	Chrna4	cholinergic receptor, nicotinic, alpha polypeptide 4	chr2:180753085-180773892	11438	NM_015730	6.976	9.05	-2.075	0.237	0.27824	0.00073	3.847
743	A_52_P347956	Cyp2j13	cytochrome P450, family 2, subfamily j, polypeptide 13	chr4:95709351-95744231	230459	NM_145548	5.396	7.471	-2.075	0.237	0.39449	0.00085	3.516
744	A_52_P487303	Rasgrp1	RAS guanyl releasing protein 1	chr2:117105730-117168737	19419	NM_011246	12.238	14.314	-2.076	0.237	1	0.00221	1.87
745	A_51_P416080	Stxbp6	syntaxin binding protein 6 (amisyn)	chr12:45953473-46175470	217517	NM_144552	7.582	9.662	-2.08	0.237	1	0.00157	2.454
746	A_51_P317620	AI851790*	expressed sequence AI851790	chr10:122701132-123178032			10.197	12.281	-2.083	0.236	1	0.00454	0.702
747	A_52_P129624	Dgkk*	diacylglycerol kinase kappa				7.993	10.082	-2.089	0.235	1	0.01701	-1.234
748	A_51_P145948	Neto1	neuropilin (NRP) and tolloid (TLL)-like 1	chr18:86565008-86672223	246317	NM_144946	10.174	12.263	-2.09	0.235	1	0.00448	0.719
749	A_51_P172952	A830018L16Rik*	RIKEN cDNA A830018L16 gene				7.657	9.752	-2.095	0.234	0.24533	0.00069	3.966
750	A_52_P483959	C1ql2	complement component 1, q subcomponent-like 2	chr1:122237152-122239748	226359	NM_207233	6.581	8.682	-2.101	0.233	1	0.00463	0.664
751	A_52_P1044964	Grin2b	glutamate receptor, ionotropic, NMDA2B (epsilon 2)	chr6:135679844-136123529	14812	NM_008171	9.171	11.276	-2.104	0.233	1	0.03392	-2.157
752	A_52_P1019369	4833415N18Rik*	RIKEN cDNA 4833415N18 gene				5.834	7.942	-2.108	0.232	1	0.00239	1.757
753	A_51_P184171	Umodl1	uromodulin-like 1	chr17:31091624-31147653	52020	NM_177465	5.368	7.478	-2.11	0.232	0.24308	0.00069	3.975
754	A_51_P211436	Gpr83	G protein-coupled receptor 83	chr9:14664698-14673943	14608	NM_010287	10.354	12.467	-2.113	0.231	1	0.01004	-0.492
755	A_52_P288177	Epha4	Eph receptor A4	chr1:77363760-77511663	13838	NM_007936	11.034	13.148	-2.114	0.231	0.05154	0.00039	5.442
756	A_51_P482503	Tpd52l1	tumor protein D52-like 1	chr10:31052186-31165727	21987	NM_009413	10.946	13.064	-2.118	0.23	0.8511	0.0013	2.786
757	A_52_P593625	C630007B19Rik	RIKEN cDNA C630007B19 gene	chr6:96063148-96607192	320265	NM_182808	8.134	10.254	-2.12	0.23	1	0.00497	0.551
758	A_52_P676947	Tacr3	tachykinin receptor 3	chr3:134491971-134597536	21338	NM_021382	7.439	9.563	-2.124	0.229	1	0.01367	-0.932
759	A_51_P174996	Slc17a6	solute carrier family 17 (sodium-dependent inorganic phosphate cotransporter), member 6	chr7:58877437-58926489	140919	NM_080853	12.338	14.468	-2.13	0.228	1	0.00824	-0.197
760	A_51_P119039	Npy5r	neuropeptide Y receptor Y5	chr8:69203866-69211993	18168	NM_016708	7.044	9.175	-2.131	0.228	1	0.00272	1.515
761	A_51_P388517	Ldb2	LIM domain binding 2	chr5:44863372-45190946	16826	NM_010698	7.979	10.111	-2.132	0.228	1	0.00163	2.407
762	A_52_P337246	Isl1	ISL1 transcription factor, LIM/homeodomain	chr13:117088489-117099896	16392	NM_021459	5.704	7.846	-2.141	0.227	1	0.00743	-0.047
763	A_51_P393124	Gabra4	gamma-aminobutyric acid (GABA-A) receptor, subunit alpha 4	chr5:71960973-72049547	14397	NM_010251	12.015	14.16	-2.144	0.226	1	0.00217	1.898
764	A_51_P275016	Slc7a3	solute carrier family 7 (cationic amino acid transporter, y+ system), member 3	chrX:98274560-98281359	11989	NM_007515	10.477	12.624	-2.148	0.226	1	0.00416	0.832
765	A_52_P548011	D230021J17Rik*	RIKEN cDNA D230021J17 gene				8.166	10.319	-2.153	0.225	1	0.00515	0.495
766	A_52_P1098851	3110009O07Rik*	RIKEN cDNA 3110009O07 gene				6.907	9.062	-2.155	0.225	1	0.00628	0.198
767	A_52_P8197	Slc17a6	solute carrier family 17 (sodium-dependent inorganic phosphate cotransporter), member 6	chr7:58877437-58926489	140919	NM_080853	12.12	14.276	-2.156	0.224	1	0.00403	0.883
768	A_52_P273559	Kcnc2	potassium voltage gated channel, Shaw-related subfamily, member 2	chr10:111708179-111903360	268345	NM_001025581	6.815	8.979	-2.164	0.223	1	0.00147	2.578
769	A_51_P307150	Indo	indoleamine-pyrrole 2,3 dioxygenase	chr8:25694608-25707481	15930	NM_008324	6.36	8.527	-2.167	0.223	1	0.01238	-0.789
770	A_51_P173114	Pcdh21	protocadherin 21	chr14:37891049-37911435	170677	NM_130878	7.293	9.462	-2.169	0.222	1	0.00242	1.726
771	A_52_P487454	Htr2c	5-hydroxytryptamine (serotonin) receptor 2C	chrX:143397056-143631820	15560	NM_008312	10.281	12.451	-2.17	0.222	1	0.00809	-0.173
772	A_52_P113043	Kctd4	potassium channel tetramerisation domain containing 4	chr14:76354810-76365024	67516	NM_026214	7.887	10.059	-2.172	0.222	0.1018	0.00049	4.799
773	A_52_P30006	Adamts19	a disintegrin-like and metallopeptidase (reprolysin type) with thrombospondin type 1 motif, 19	chr18:58996418-59213332	240322	NM_175506	5.636	7.81	-2.174	0.222	1	0.00356	1.089
774	A_52_P679818	4833423E24Rik	RIKEN cDNA 4833423E24 gene	chr2:85323751-85359181	228151	NM_001081664	5.672	7.846	-2.174	0.222	0.12886	0.00052	4.576
775	A_52_P189707	Camk2a	calcium/calmodulin-dependent protein kinase II alpha	chr18:61085286-61147798	12322	NM_177407, NM_009792	12.379	14.556	-2.177	0.221	1	0.00434	0.771
776	A_51_P511000	C130090K23Rik	RIKEN cDNA C130090K23 gene	chr5:73797317-73844664	231293	NM_145560, NM_181323	6.749	8.926	-2.177	0.221	1	0.00577	0.322
777	A_52_P420369	Six6os1	Six6 opposite strand transcript 1	chr12:73982096-74018752	75801	NM_029444	7.944	10.122	-2.178	0.221	1	0.00281	1.465
778	A_52_P492989	Ncan	neurocan	chr8:72616984-72644709	13004, 100047888	NM_007789	12.369	14.552	-2.183	0.22	0.72137	0.00119	2.943
779	A_51_P229498	Lrfn2	leucine rich repeat and fibronectin type III domain containing 2	chr17:49071704-49236913	70530	NM_027452	9.47	11.659	-2.189	0.219	1	0.00505	0.525
780	A_51_P295131	Pax7	paired box gene 7	chr4:139294249-139388883	18509	NM_011039	5.881	8.071	-2.19	0.219	1	0.00469	0.643
781	A_51_P465591	Grm5	glutamate receptor, metabotropic 5	chr7:94750952-95282640	108071	NM_001081414	11.247	13.442	-2.196	0.218	1	0.02616	-1.811
782	A_52_P569168	AK045458					11.634	13.831	-2.196	0.218	0.20763	0.00064	4.125
783	A_51_P116239	Ptpn5	protein tyrosine phosphatase, non-receptor type 5	chr7:54333172-54389054	19259	NM_013643	9.372	11.569	-2.197	0.218	1	0.00259	1.611
784	A_51_P383399	Aldh1a7	aldehyde dehydrogenase family 1, subfamily A7	chr19:20767443-20802046	26358	NM_011921	6.672	8.873	-2.201	0.218	1	0.00283	1.452
785	A_51_P286798	Magel2	melanoma antigen, family L, 2	chr7:69524573-69526522	27385		8.131	10.34	-2.209	0.216	1	0.00259	1.618
786	A_51_P145132	Mcpt4 (Mcpt4, Mcpt3)	mast cell protease 4	chr14:56678584-56681147	17227	NM_010779	6.007	8.222	-2.215	0.215	1	0.00197	2.033
787	A_51_P122867	Syt16	synaptotagmin XVI	chr12:75098744-75368903	238266		9.682	11.896	-2.215	0.215	1	0.00171	2.29
788	A_51_P465082	Tox3	TOX high mobility group box family member 3	chr8:92770939-92872146	244579	NM_172913	9.036	11.251	-2.216	0.215	0.13065	0.00052	4.563
789	A_52_P542165	Nelf	nasal embryonic LHRH factor	chr2:24909926-24918401	56876	NM_001039386, NM_001039387, NM_020276	9.682	11.898	-2.216	0.215	0.61677	0.0011	3.092
790	A_52_P667324	Syt5	synaptotagmin V	chr7:4491370-4498169	53420	NM_016908	8.52	10.738	-2.218	0.215	1	0.00319	1.255
791	A_51_P154913	AK037524					5.992	8.214	-2.222	0.214	1	0.00426	0.796
792	A_52_P526565	Pde1a	phosphodiesterase 1A, calmodulin-dependent	chr2:79674611-79969615	18573	NM_016744, NM_001009979, NM_001009978	9.848	12.071	-2.224	0.214	1	0.01312	-0.875
793	A_51_P142421	Rspo1	R-spondin homolog (Xenopus laevis)	chr4:124663674-124686328	192199	NM_138683	9.381	11.61	-2.229	0.213	1	0.00729	-0.02
794	A_51_P216456	Tac1	tachykinin 1	chr6:7505071-7512973	21333	NM_009311	10.428	12.657	-2.229	0.213	1	0.00416	0.834
795	A_52_P639048	Adra1b	adrenergic receptor, alpha 1b	chr11:43588108-43714695	11548	NM_007416	10.809	13.044	-2.235	0.212	1	0.00167	2.336
796	A_51_P425815	AI835086*	expressed sequence AI835086				5.894	8.13	-2.235	0.212	1	0.02165	-1.562
797	A_51_P271311	Slc6a11	solute carrier family 6 (neurotransmitter transporter, GABA), member 11	chr6:114081235-114199880	243616	NM_172890	10.22	12.456	-2.236	0.212	1	0.0143	-0.994
798	A_51_P213099	Ntng1*	netrin G1				12.399	14.641	-2.242	0.211	1	0.00336	1.186
799	A_52_P143037	Gabra5	gamma-aminobutyric acid (GABA-A) receptor, subunit alpha 5	chr7:64663060-64765379	110886	NM_176942	8.917	11.164	-2.247	0.211	1	0.01161	-0.699
800	A_52_P37826	Dapk1	death associated protein kinase 1	chr13:60703308-60864546	69635	NM_029653, NM_134062	8.459	10.707	-2.248	0.211	1	0.00213	1.917
801	A_52_P455251	Emx2	empty spiracles homolog 2 (Drosophila)	chr19:59533180-59539847	13797	NM_010132	5.449	7.702	-2.252	0.21	1	0.00558	0.374
802	A_52_P409769	Mrvi1	MRV integration site 1	chr7:118011786-118125975	17540	NM_194464	8.921	11.186	-2.265	0.208	1	0.00151	2.538
803	A_51_P271417	Fibcd1	fibrinogen C domain containing 1	chr2:31668817-31701525	98970		6.194	8.464	-2.27	0.207	1	0.00277	1.484
804	A_51_P447595	Scube1	signal peptide, CUB domain, EGF-like 1	chr15:83433013-83555451	64706		9.314	11.585	-2.271	0.207	0.20578	0.00064	4.133
805	A_52_P149521	Syt16	synaptotagmin XVI	chr12:75098744-75368903	238266		9.049	11.321	-2.272	0.207	0.9678	0.0014	2.664
806	A_51_P170463	Gpr17	G protein-coupled receptor 17	chr18:32102669-32109290	574402	NM_001025381	10.247	12.521	-2.274	0.207	0.04228	0.00039	5.629
807	A_52_P455428	Glra2	glycine receptor, alpha 2 subunit	chrX:161566951-161765325	237213	NM_183427	7.601	9.875	-2.274	0.207	1	0.00421	0.816
808	A_52_P298373	Gabrg3*	gamma-aminobutyric acid (GABA-A) receptor, subunit gamma 3				7.626	9.918	-2.292	0.204	1	0.00237	1.771
809	A_52_P233664	Atbf1 (Zfhx3)	AT motif binding factor 1	chr8:111238544-111485521	11906	NM_007496	8.299	10.592	-2.293	0.204	1	0.00224	1.847
810	A_52_P876623	(Col25a1)	collagen, type XXV, alpha 1 Gene [Source:MGI (curated);Acc:Col25a1-001]	chr3:129883809-130302795	77018	NM_198711, NM_029838	6.158	8.452	-2.293	0.204	0.22575	0.00066	4.045
811	A_52_P526417	AK034079					7.351	9.656	-2.305	0.202	1	0.00168	2.327
812	A_51_P171832	Nrgn*	neurogranin				13.777	16.085	-2.308	0.202	1	0.02281	-1.631
813	A_52_P61864	Wnt2	wingless-related MMTV integration site 2	chr6:17938940-17980356	22413	NM_023653	6.522	8.836	-2.314	0.201	1	0.00542	0.423
814	A_52_P356698	Shox2	short stature homeobox 2	chr3:66777193-66785693	20429	NM_013665	6.69	9.005	-2.315	0.201	1	0.00486	0.591
815	A_51_P278653	Rprm	reprimo, TP53 dependent G2 arrest mediator candidate	chr2:53936504-53937963	67874	NM_023396	9.631	11.949	-2.318	0.201	1	0.00284	1.444
816	A_52_P63905	Ddc	dopa decarboxylase	chr11:11714104-11798047	13195	NM_016672	7.689	10.012	-2.323	0.2	1	0.02415	-1.71
817	A_52_P145628	Sstr4	somatostatin receptor 4	chr2:148221078-148226679	20608	NM_009219	8.456	10.781	-2.325	0.2	1	0.0023	1.803
818	A_52_P265051	6030405A18Rik	RIKEN cDNA 6030405A18 gene	chr3:54700993-54719809	329641	NM_177854	8.451	10.776	-2.325	0.2	1	0.0023	1.803
819	A_52_P497908	Lhx6	LIM homeobox protein 6	chr2:35937470-35960928	16874	NM_001083125, NM_001083127, NM_008500, NM_001083126	6.143	8.469	-2.327	0.199	1	0.01031	-0.53
820	A_51_P178692	Enc1	ectodermal-neural cortex 1	chr13:98011060-98022988	13803	NM_007930	9.152	11.486	-2.334	0.198	1	0.01179	-0.721
821	A_52_P571537	3110039M20Rik*	RIKEN cDNA 3110039M20 gene				6.281	8.618	-2.337	0.198	1	0.03999	-2.371
822	A_52_P627967	Rprm	reprimo, TP53 dependent G2 arrest mediator candidate	chr2:53936504-53937963	67874	NM_023396	9.154	11.492	-2.339	0.198	1	0.00208	1.96
823	A_52_P867156	AK047784					6.009	8.349	-2.34	0.197	1	0.00382	0.973
824	A_51_P422685	Zmat4	zinc finger, matrin type 4	chr8:24780135-25173575	320158	NM_177086	11.224	13.579	-2.355	0.195	1	0.00499	0.543
825	A_52_P542570	Bhlhb4	basic helix-loop-helix domain containing, class B4	chr2:180509086-180511605	140489		5.644	8.001	-2.357	0.195	0.43728	0.0009	3.418
826	A_51_P114797	Cbln2	cerebellin 2 precursor protein	chr18:86880502-86887673	12405	NM_172633	7.181	9.54	-2.359	0.195	0.60793	0.00109	3.106
827	A_52_P43326	Rgs4	regulator of G-protein signaling 4	chr1:171671807-171677773	19736	NM_009062	10.382	12.744	-2.362	0.194	1	0.00416	0.833
828	A_51_P101460	Dsp*	desmoplakin	chr13:38288353-38290444	109620		7.971	10.339	-2.367	0.194	1	0.00242	1.726
829	A_51_P330481	Lhx9	LIM homeobox protein 9	chr1:140721763-140745153	16876	NM_010714, NM_001025565, NM_001042577	8.598	10.966	-2.368	0.194	1	0.00184	2.171
830	A_52_P803471	A830036E02Rik*	RIKEN cDNA A830036E02 gene				6.282	8.655	-2.373	0.193	1	0.00353	1.107
831	A_52_P366764	Drd1a	dopamine receptor D1A	chr13:54147024-54151027	13488	NM_010076	6.533	8.906	-2.373	0.193	1	0.00344	1.148
832	A_51_P366306	Zcchc12	zinc finger, CCHC domain containing 12	chrX:33735941-33739153	72693	NM_028325	12.091	14.466	-2.375	0.193	1	0.00402	0.889
833	A_52_P470150	Ddc	dopa decarboxylase	chr11:11714104-11798047	13195	NM_016672	11.495	13.871	-2.376	0.193	1	0.02046	-1.489
834	A_52_P112463	Dlx6os1*	Dlx6 opposite strand transcript 1				5.116	7.496	-2.38	0.192	1	0.00213	1.919
835	A_51_P486223	Th	tyrosine hydroxylase	chr7:150078681-150116528	21823	NM_009377	9.397	11.777	-2.38	0.192	1	0.00777	-0.11
836	A_51_P501145	Lef1	lymphoid enhancer binding factor 1	chr3:130813239-130927274	16842	NM_010703	9.425	11.81	-2.385	0.191	0.03296	0.00038	5.864
837	A_51_P375453	Wnt9a	wingless-type MMTV integration site 9A	chr11:59120430-59147054	216795	NM_139298	7.627	10.014	-2.386	0.191	0.00357	0.00018	7.946
838	A_52_P350750	Chrna4	cholinergic receptor, nicotinic, alpha polypeptide 4	chr2:180753085-180773892	11438	NM_015730	9.019	11.415	-2.396	0.19	1	0.00418	0.825
839	A_51_P354609	Lrrc3	leucine rich repeat containing 3	chr10:77362592-77365255	237387	NM_145152	7.025	9.422	-2.397	0.19	0.01123	0.00027	6.875
840	A_52_P146043	Tcf7l2	transcription factor 7-like 2, T-cell specific, HMG-box	chr19:55816310-56008144	21416	NM_009333	7.864	10.267	-2.403	0.189	0.58095	0.00106	3.149
841	A_51_P253263	(OTTMUSG00000017459)	zinc finger protein 831 Gene [Source:MGI Symbol;Acc:MGI:3641861]	chr2:174469035-174536333	100043757, 100046804	NM_001099328	5.955	8.358	-2.403	0.189	1	0.00774	-0.103
842	A_51_P273433	Prkg2	protein kinase, cGMP-dependent, type II	chr5:99360287-99466098	19092	NM_008926	8.478	10.883	-2.405	0.189	1	0.00318	1.26
843	A_51_P421912	Tox	thymocyte selection-associated HMG box gene	chr4:6614605-6917870	100044677, 252838	NM_145711	8.152	10.566	-2.415	0.188	0.072	0.00043	5.126
844	A_52_P1016836	EG639426*	predicted gene, EG639426	chr12:58797921-58838785			5.719	8.141	-2.422	0.187	1	0.00265	1.563
845	A_51_P229869	Grin2b	glutamate receptor, ionotropic, NMDA2B (epsilon 2)	chr6:135679844-136123529	14812	NM_008171	9.946	12.368	-2.422	0.187	1	0.0025	1.68
846	A_52_P172126	AK045384					7.508	9.942	-2.434	0.185	1	0.00167	2.339
847	A_52_P187058	Nptx2*	neuronal pentraxin 2				7.208	9.655	-2.447	0.183	1	0.00164	2.369
848	A_52_P150436	1700086L19Rik	RIKEN cDNA 1700086L19 gene	chr12:75389722-75396932			8.856	11.305	-2.449	0.183	0.48484	0.00097	3.32
849	A_52_P1013846	(Igsf1)	immunoglobulin superfamily, member 1 Gene [Source:MGI (curated);Acc:Igsf1-001]	chrX:47135713-47150926	209268	NM_177591, NM_183336, NM_183335, NM_177915	10.28	12.73	-2.45	0.183	1	0.00208	1.956
850	A_52_P233703	Cbln2	cerebellin 2 precursor protein	chr18:86880502-86887673	12405	NM_172633	10.428	12.888	-2.46	0.182	1	0.0126	-0.812
851	A_52_P432245	Cbln4	cerebellin 4 precursor protein	chr2:171861729-171868869	228942	NM_175631	7.427	9.893	-2.466	0.181	1	0.00824	-0.197
852	A_51_P442993	Npas1	neuronal PAS domain protein 1	chr7:17041071-17062129	100048697, 18142	NM_008718	10.2	12.682	-2.482	0.179	1	0.04826	-2.617
853	A_51_P485756	Nts	neurotensin	chr10:101944392-101953069	67405	NM_024435	8.937	11.427	-2.49	0.178	1	0.00346	1.139
854	A_51_P452533	D1Ertd471e*	DNA segment, Chr 1, ERATO Doi 471, expressed	chr1:168184270-168246954	100048175, 100039795		11.253	13.747	-2.495	0.177	1	0.0024	1.746
855	A_51_P184331	Scn3b	sodium channel, voltage-gated, type III, beta	chr9:40076802-40099202	235281	NM_153522, NM_178227, NM_001083917	11.825	14.32	-2.495	0.177	1	0.00609	0.245
856	A_52_P699664	AK079569					7.72	10.218	-2.498	0.177	1	0.00434	0.771
857	A_51_P448478	Slc10a4	solute carrier family 10 (sodium/bile acid cotransporter family), member 4	chr5:73398143-73405905	231290	NM_173403	7.257	9.767	-2.51	0.176	1	0.02387	-1.695
858	A_52_P26794	Basp1	brain abundant, membrane attached signal protein 1	chr15:25293243-25343472	70350	NM_027395	10.19	12.708	-2.518	0.175	1	0.00711	0.014
859	A_52_P233701	Cbln2	cerebellin 2 precursor protein	chr18:86880502-86887673	12405	NM_172633	10.257	12.776	-2.519	0.174	1	0.00863	-0.27
860	A_52_P566741	Tcf7l2	transcription factor 7-like 2, T-cell specific, HMG-box	chr19:55816310-56008144	21416	NM_009333	11.504	14.045	-2.54	0.172	0.63293	0.00112	3.067
861	A_51_P366157	Igsf1	immunoglobulin superfamily, member 1	chrX:47135713-47150926	209268	NM_177591, NM_183336, NM_183335, NM_177915	10.203	12.744	-2.541	0.172	0.6646	0.00114	3.021
862	A_52_P859742	B230208B08Rik*	RIKEN cDNA B230208B08 gene				6.98	9.522	-2.542	0.172	1	0.00187	2.132
863	A_51_P184340	Scn3b	sodium channel, voltage-gated, type III, beta	chr9:40076802-40099202	235281	NM_153522, NM_178227, NM_001083917	7.351	9.901	-2.55	0.171	1	0.00225	1.837
864	A_52_P622850	Hes5	hairy and enhancer of split 5 (Drosophila)	chr4:154335030-154336477	15208	NM_010419	11.296	13.848	-2.552	0.171	0.30838	0.00078	3.75
865	A_52_P395280	Lrrc55	leucine rich repeat containing 55	chr2:85002491-85036856	241528	NM_001033346	7.994	10.558	-2.564	0.169	0.01681	0.00032	6.497
866	A_52_P546363	Gata3*	GATA binding protein 3				7.507	10.083	-2.576	0.168	1	0.01181	-0.724
867	A_51_P126437	Enc1	ectodermal-neural cortex 1	chr13:98011060-98022988	13803	NM_007930	12.472	15.062	-2.59	0.166	1	0.00151	2.541
868	A_52_P345229	Foxb1	forkhead box B1	chr9:69605559-69608634	64290	NM_022378	7.312	9.906	-2.594	0.166	0.12927	0.00052	4.573
869	A_51_P322115	Htr5b	5-hydroxytryptamine (serotonin) receptor 5B	chr1:123406352-123425012	15564	NM_010483	6.84	9.441	-2.601	0.165	1	0.00545	0.414
870	A_52_P624415	Tmem10 (Opalin)	transmembrane protein 10	chr19:41137910-41151603	226115	NM_153520	8.679	11.286	-2.607	0.164	1	0.00211	1.942
871	A_51_P513000	Ntng1	netrin G1	chr3:109584027-109938426	80883	NM_030699	11.575	14.182	-2.607	0.164	0.08478	0.00046	4.972
872	A_51_P439311	1810041L15Rik	RIKEN cDNA 1810041L15 gene	chr15:84210477-84277527	72301		6.941	9.551	-2.61	0.164	0.32776	0.00079	3.692
873	A_52_P686130	Atp2a1	ATPase, Ca++ transporting, cardiac muscle, fast twitch 1	chr7:133589374-133606618	11937	NM_007504	6.361	8.971	-2.611	0.164	0.31324	0.00078	3.735
874	A_51_P206197	Gtf2a1lf (Gtf2a1l)	general transcription factor II A, 1-like factor	chr17:89068017-89114489	71828	NM_023630	5.918	8.529	-2.611	0.164	0.10847	0.00049	4.739
875	A_51_P274488	Pcdh8	protocadherin 8	chr14:80166592-80171107	18530	NM_021543	9.549	12.177	-2.628	0.162	1	0.00143	2.628
876	A_52_P164797	Lct	lactase	chr1:130181341-130224895	226413	NM_001081078	7.996	10.641	-2.645	0.16	1	0.02073	-1.505
877	A_51_P171772	Bcl11b	B-cell leukemia/lymphoma 11B	chr12:109148613-109241624	58208	NM_001079883, NM_021399	8.847	11.501	-2.654	0.159	1	0.00283	1.453
878	A_52_P1189049	(Hs3st4)	heparan sulfate (glucosamine) 3-O-sulfotransferase 4 Gene [Source:MGI (curated);Acc:Hs3st4-001]	chr7:131126383-131542503	628779		10.699	13.358	-2.659	0.158	1	0.00907	-0.345
879	A_52_P93479	Lmo3*	LIM domain only 3				7.643	10.305	-2.662	0.158	1	0.00249	1.681
880	A_51_P103054	Adamts19	a disintegrin-like and metallopeptidase (reprolysin type) with thrombospondin type 1 motif, 19	chr18:58996418-59213332	240322	NM_175506	6.169	8.833	-2.664	0.158	1	0.00186	2.15
881	A_52_P407263	Lrrc7	leucine rich repeat containing 7	chr3:157745859-158225185			6.976	9.641	-2.665	0.158	0.305	0.00077	3.76
882	A_51_P182728	Stx1a	syntaxin 1A (brain)	chr5:135499407-135526968	20907	NM_016801	9.271	11.943	-2.673	0.157	1	0.00283	1.448
883	A_52_P497208	Camkv	CaM kinase-like vesicle-associated	chr9:107838251-107852021	235604	NM_145621	11.735	14.417	-2.682	0.156	1	0.00323	1.238
884	A_52_P684647	Ptk2b	PTK2 protein tyrosine kinase 2 beta	chr14:66772099-66899889	19229	NM_172498	7.662	10.348	-2.687	0.155	1	0.03718	-2.278
885	A_51_P206489	Fezf2	Fez family zinc finger 2	chr14:13174616-13178342	54713	NM_080433	6.029	8.734	-2.705	0.153	1	0.02985	-1.993
886	A_51_P311919	Npy2r	neuropeptide Y receptor Y2	chr3:82342325-82351994	18167		6.573	9.291	-2.718	0.152	1	0.00372	1.025
887	A_51_P353252	Mal2	mal, T-cell differentiation protein 2	chr15:54403040-54434393	105853	NM_178920	11.122	13.868	-2.745	0.149	1	0.00152	2.526
888	A_51_P225427	Pkp2	plakophilin 2	chr16:16213438-16272805	67451	NM_026163	8.383	11.128	-2.746	0.149	0.97769	0.00141	2.654
889	A_52_P464831	Dlx1	distal-less homeobox 1	chr2:71367502-71372037	13390	NM_010053	5.839	8.603	-2.764	0.147	1	0.00366	1.048
890	A_52_P558843	Efcbp1 (Necab1)	EF hand calcium binding protein 1	chr4:14879396-15076941	69352	NM_178617	9.074	11.87	-2.796	0.144	1	0.0119	-0.734
891	A_51_P448479	Slc10a4	solute carrier family 10 (sodium/bile acid cotransporter family), member 4	chr5:73398143-73405905	231290	NM_173403	9.293	12.092	-2.799	0.144	1	0.03312	-2.124
892	A_52_P100156	A830036E02Rik (Krt12)	RIKEN cDNA A830036E02 gene	chr11:99276978-99283573	268482	NM_010661	6.117	8.93	-2.812	0.142	0.73433	0.0012	2.926
893	A_52_P680870	Ctxn1	cortexin 1	chr8:4257661-4259210	330695	NM_183315	9.84	12.674	-2.833	0.14	1	0.00375	1.011
894	A_52_P1132525	AK082545					7.891	10.734	-2.843	0.139	0.17473	0.0006	4.288
895	A_52_P316355	Tcf7l2	transcription factor 7-like 2, T-cell specific, HMG-box	chr19:55816310-56008144	21416	NM_009333	8.825	11.674	-2.848	0.139	0.76835	0.00122	2.883
896	A_51_P224164	Slc26a4	solute carrier family 26, member 4	chr12:32204692-32244834	23985	NM_011867	7.192	10.041	-2.849	0.139	1	0.01357	-0.923
897	A_51_P515046	A_51_P515046					8.4	11.27	-2.87	0.137	1	0.00186	2.154
898	A_51_P480202	Dlx2	distal-less homeobox 2	chr2:71381466-71384811	13392	NM_010054	5.147	8.02	-2.873	0.137	1	0.00212	1.935
899	A_52_P545132	Kcnc2	potassium voltage gated channel, Shaw-related subfamily, member 2	chr10:111708179-111903360	268345	NM_001025581	10.679	13.566	-2.887	0.135	1	0.00164	2.385
900	A_52_P198898	E130306M17Rik (Samd5)	RIKEN cDNA E130306M17 gene	chr10:9347057-9395006	320825	NM_177271	8.909	11.813	-2.903	0.134	1	0.00149	2.563
901	A_52_P515572	Slc18a2	solute carrier family 18 (vesicular monoamine), member 2	chr19:59335386-59370501	214084	NM_172523	9.532	12.436	-2.904	0.134	1	0.0198	-1.437
902	A_51_P507333	Kcnc2	potassium voltage gated channel, Shaw-related subfamily, member 2	chr10:111708179-111903360	268345	NM_001025581	10.601	13.513	-2.912	0.133	0.89638	0.00134	2.736
903	A_52_P1149183	BB345768					10.379	13.295	-2.916	0.132	1	0.00151	2.532
904	A_51_P481494	(Robo3)	roundabout homolog 3 (Drosophila) Gene [Source:MGI (curated);Acc:Robo3-001]	chr9:37223630-37240748	19649		8.246	11.167	-2.921	0.132	0.27754	0.00073	3.85
905	A_52_P97699	D430019H16Rik*	RIKEN cDNA D430019H16 gene				10.888	13.822	-2.934	0.131	1	0.0027	1.53
906	A_51_P161793	Chrnb3	cholinergic receptor, nicotinic, beta polypeptide 3	chr8:28479183-28510201	108043	NM_173212, NM_027454	5.739	8.678	-2.94	0.13	0.06749	0.00042	5.188
907	A_51_P257419	Lhx2	LIM homeobox protein 2	chr2:38206828-38225248	16870	NM_010710	9.865	12.817	-2.952	0.129	1	0.00679	0.079
908	A_51_P481489	(Robo3)	roundabout homolog 3 (Drosophila) Gene [Source:MGI (curated);Acc:Robo3-001]	chr9:37223630-37240748	19649		7.598	10.557	-2.96	0.129	0.09946	0.00048	4.821
909	A_52_P440836	Egr3*	early growth response 3				6.532	9.517	-2.984	0.126	1	0.00329	1.215
910	A_51_P240136	Gng8	guanine nucleotide binding protein (G protein), gamma 8 subunit	chr7:17477135-17480784	14709	NM_010320	9.281	12.267	-2.986	0.126	0.38039	0.00084	3.55
911	A_51_P118188	Lmo3	LIM domain only 3	chr6:138313002-138530489	109593	NM_207222	8.184	11.18	-2.996	0.125	0.73998	0.0012	2.919
912	A_51_P469550	Slc18a2	solute carrier family 18 (vesicular monoamine), member 2	chr19:59335386-59370501	214084	NM_172523	8.607	11.622	-3.015	0.124	1	0.01562	-1.121
913	A_52_P176405	Arx	aristaless related homeobox gene (Drosophila)	chrX:90531861-90543696	11878	NM_007492	5.442	8.472	-3.029	0.122	1	0.00251	1.667
914	A_51_P240703	Gpr151	G protein-coupled receptor 151	chr18:42737997-42739265	240239	NM_181543	5.432	8.484	-3.052	0.121	0.03611	0.00038	5.778
915	A_52_P113611	Scn5a	sodium channel, voltage-gated, type V, alpha	chr9:119392528-119488134	20271		7.179	10.259	-3.08	0.118	1	0.00337	1.179
916	A_51_P237307	Plekhg1	pleckstrin homology domain containing, family G (with RhoGef domain) member 1	chr10:6379238-6606177	213783	NM_001033253	9.518	12.599	-3.081	0.118	0.20695	0.00064	4.128
917	A_51_P201873	Gpr88	G-protein coupled receptor 88	chr3:115952574-115956372	64378	NM_022427	7.989	11.082	-3.093	0.117	1	0.01855	-1.351
918	A_51_P311904	Ptk2b	PTK2 protein tyrosine kinase 2 beta	chr14:66772099-66899889	19229	NM_172498	9.878	13.01	-3.132	0.114	1	0.00416	0.835
919	A_52_P54770	C130034I18Rik*	RIKEN cDNA C130034I18 gene				5.451	8.59	-3.138	0.114	0.26548	0.00072	3.892
920	A_51_P212666	Ntsr1	neurotensin receptor 1	chr2:180234681-180279684	18216, 100047803	NM_018766	7.359	10.501	-3.142	0.113	1	0.00822	-0.194
921	A_51_P501897	Pitx2	paired-like homeodomain transcription factor 2	chr3:128902842-128922504	18741	NM_011098, NM_001042504, NM_001042502	5.347	8.495	-3.147	0.113	0.15499	0.00056	4.401
922	A_51_P458638	Spink8	serine peptidase inhibitor, Kazal type 8	chr9:109719141-109729142	78709	NM_183136	6.676	9.859	-3.184	0.11	1	0.01705	-1.239
923	A_52_P101487	Ddn	dendrin	chr15:98634216-98638356	13199		7.719	10.921	-3.202	0.109	1	0.01357	-0.922
924	A_52_P925277	Bcl11b	B-cell leukemia/lymphoma 11B	chr12:109148613-109241624	58208	NM_001079883, NM_021399	7.677	10.886	-3.209	0.108	1	0.00171	2.29
925	A_51_P302942	Rasl10a	RAS-like, family 10, member A	chr11:4958131-4960388	75668	NM_145216	7.726	10.965	-3.239	0.106	1	0.00457	0.69
926	A_51_P421724	St6galnac5	ST6 (alpha-N-acetyl-neuraminyl-2,3-beta-galactosyl-1,3)-N-acetylgalactosaminide alpha-2,6-sialyltransferase 5	chr3:152482850-152645174	26938	NM_012028	8.471	11.71	-3.239	0.106	0.37541	0.00084	3.563
927	A_51_P136508	Avp	arginine vasopressin	chr2:130406366-130408309	11998	NM_009732	8.461	11.753	-3.292	0.102	1	0.01027	-0.523
928	A_52_P208649	Cartpt	CART prepropeptide	chr13:100668439-100670638	27220	NM_013732	10.032	13.355	-3.323	0.1	1	0.00783	-0.123
929	A_52_P643674	A630043P06*	hypothetical protein A630043P06				6.428	9.793	-3.365	0.097	0.33435	0.00079	3.673
930	A_52_P203316	Kcnf1*	potassium voltage-gated channel, subfamily F, member 1				7.14	10.512	-3.372	0.097	1	0.00431	0.78
931	A_51_P232868	C230078M08Rik	RIKEN cDNA C230078M08 gene	chr17:26580489-26583258	319749		9.077	12.46	-3.383	0.096	0.48598	0.00097	3.318
932	A_52_P309166	St6galnac5	ST6 (alpha-N-acetyl-neuraminyl-2,3-beta-galactosyl-1,3)-N-acetylgalactosaminide alpha-2,6-sialyltransferase 5	chr3:152482850-152645174	26938	NM_012028	8.027	11.456	-3.43	0.093	0.64241	0.00113	3.053
933	A_52_P1051779	ENSMUSG00000056615*	predicted gene, ENSMUSG00000056615				9.352	12.784	-3.432	0.093	0.08075	0.00045	5.018
934	A_52_P392314	Cpne4	copine IV	chr9:104449616-104935266	74020	NM_028719	8.809	12.247	-3.439	0.092	1	0.00444	0.734
935	A_51_P416152	Cartpt	CART prepropeptide	chr13:100668439-100670638	27220	NM_013732	9.526	13.054	-3.528	0.087	1	0.00743	-0.048
936	A_51_P105161	Cpne4*	copine IV				9.338	12.867	-3.529	0.087	0.73254	0.0012	2.928
937	A_51_P222773	Foxa2	forkhead box A2	chr2:147868613-147872705	15376	NM_010446	5.44	9.04	-3.6	0.082	1	0.00225	1.836
938	A_51_P353914	Icam5	intercellular adhesion molecule 5, telencephalin	chr9:20836534-20843480	15898	NM_008319	9.358	13.005	-3.647	0.08	1	0.00939	-0.398
939	A_52_P47566	Nr2e1	nuclear receptor subfamily 2, group E, member 1	chr10:42281776-42303438	21907	NM_152229	6.628	10.28	-3.652	0.08	0.0936	0.00047	4.879
940	A_51_P389957	Rgs14	regulator of G-protein signaling 14	chr13:55471132-55486047	51791	NM_016758	8.27	12.023	-3.754	0.074	1	0.00196	2.055
941	A_51_P415087	Tac2	tachykinin 2	chr10:127161534-127168823	21334	NM_009312	8.522	12.294	-3.772	0.073	0.13662	0.00053	4.521
942	A_51_P503004	Cpne7	copine VII	chr8:125641274-125659082	102278	NM_170684	10.378	14.172	-3.795	0.072	1	0.00866	-0.274
943	A_51_P432567	Foxg1	forkhead box G1	chr12:50483994-50495114	15228	NM_008241	8.166	12.131	-3.965	0.064	1	0.01411	-0.974
944	A_51_P509997	Cox6a2	cytochrome c oxidase, subunit VI a, polypeptide 2	chr7:135349128-135349830	12862	NM_009943	8.766	12.739	-3.974	0.064	0.19125	0.00062	4.203
945	A_51_P179578	Gbx2	gastrulation brain homeobox 2	chr1:91824559-91827751	14472	NM_010262	6.361	10.52	-4.159	0.056	0.35883	0.00082	3.606
946	A_51_P503822	Slitrk6	SLIT and NTRK-like family, member 6	chr14:111147807-111154293	239250	NM_175499	7.506	11.869	-4.363	0.049	0.09178	0.00047	4.897
947	A_51_P119776	Synpo2*	synaptopodin 2				9.049	13.617	-4.568	0.042	0.05828	0.00041	5.326
948	A_51_P308931	Hcrt	hypocretin	chr11:100622484-100624245	15171	NM_010410	7.714	12.53	-4.816	0.035	1	0.00337	1.181
949	A_51_P362627	Tnnt1*	troponin T1, skeletal, slow	chr7:4456172-4467577	21955		9.212	14.092	-4.881	0.034	1	0.00164	2.385
950	A_52_P418814	Pmch (4930547N16Rik| Pmch)	pro-melanin-concentrating hormone	chr10:87554790-87609649| 10:87553817-87555119	75317| 110312	NM_029249| NM_029971	7.12	13.633	-6.513	0.011	0.43414	0.0009	3.425
951	A_51_P214187	Slc6a3	solute carrier family 6 (neurotransmitter transporter, dopamine), member 3	chr13:73674195-73716120	13162	NM_010020	7.326	14.106	-6.781	0.009	1	0.00465	0.657

## Sheet: G. C57BL6 hypothalamic DEGs
BioConductor Gene Listing
WT.AgedVsYoung: RawP < 0.001
								WT.AgedVsYoung
No	ID	Symbol	Name	GenomicCoord	GeneID	Aged.WT.aveA	Young.WT.aveA	M	Fold	AdjP	FDR	B	RawP
1	A_51_P362627	Tnnt1	troponin T1, skeletal, slow	chr7:4111630-4111571	21955	12.184	9.796	2.388	5.234	1	0.17204	0.936	0.00011
2	A_51_P227090	Ramp3	receptor (calcitonin) activity modifying protein 3	chr11:6577299-6577358	56089	12.795	10.492	2.303	4.934	1	0.14436	1.644	4e-05
3	A_51_P460734	Prkcd	protein kinase C, delta	chr14:29424917-29424858	18753	12.957	10.678	2.279	4.853	1	0.1907	0.618	0.00017
4	A_52_P197498	Prkcd	protein kinase C, delta	chr14:29430793-29430206	18753	11.622	9.422	2.199	4.592	1	0.22308	0.099	0.00033
5	A_51_P119776	Synpo2	synaptopodin 2	chr3:123103133-123103074	118449	12.915	10.985	1.929	3.809	1	0.14436	1.634	4e-05
6	A_51_P177965	Pp11r	placental protein 11 related	chr15:97539294-97539235	19011	9.478	7.554	1.924	3.794	1	0.19861	0.46	0.00021
7	A_52_P356698	Shox2	short stature homeobox 2	chr3:67063821-67063442	20429	7.417	5.494	1.923	3.792	1	0.18024	0.853	0.00013
8	A_51_P435410	Grid2ip	glutamate receptor, ionotropic, delta 2 (Grid2) interacting protein 1	chr5:143656306-143656556	170935	8.315	6.538	1.777	3.428	0.68414	0.14436	2.374	2e-05
9	A_52_P686130	Atp2a1	ATPase, Ca++ transporting, cardiac muscle, fast twitch 1	chr7:126238075-126237732	11937	6.848	5.179	1.669	3.181	1	0.14436	1.428	6e-05
10	A_52_P223127	Synpo2	synaptopodin 2	chr3:123104661-123104602	118449	8.286	6.765	1.521	2.87	1	0.19861	0.428	0.00022
11	A_52_P316355	Tcf7l2	transcription factor 7-like 2, T-cell specific, HMG-box	chr19:55985220-55985279	21416	8.855	7.364	1.49	2.81	1	0.14436	1.297	7e-05
12	A_52_P643674	A630043P06	hypothetical protein A630043P06	chr13:12527093-12527034	328187	9.077	7.613	1.465	2.76	1	0.26937	-0.439	0.00066
13	A_52_P75298	Cd247	CD247 antigen	chr1:167698399-167698458	12503	6.767	5.342	1.425	2.684	1	0.30103	-0.645	0.00086
14	A_52_P448648	Rab37	RAB37, member of RAS oncogene family	chr11:114978066-114978125	58222	10.112	8.692	1.42	2.677	1	0.14436	1.192	8e-05
15	A_51_P237307	Plekhg1	pleckstrin homology domain containing, family G (with RhoGef domain) member 1	chr10:6379679-6379620	213783	11.327	9.976	1.351	2.551	1	0.14916	1.101	9e-05
16	A_51_P198694	Gckr	glucokinase regulatory protein	chr5:31603791-31603850	231103	9.976	8.642	1.335	2.523	1	0.24715	-0.113	0.00044
17	A_51_P497768	A530057A03Rik	RIKEN cDNA A530057A03 gene	chr2:127127411-127127470	215456	9.735	8.412	1.323	2.501	1	0.2609	-0.37	0.00061
18	A_51_P214269	Epha1	Eph receptor A1	chr6:42288250-42288191	13835	8.608	7.304	1.304	2.468	1	0.26636	-0.412	0.00064
19	A_52_P409769	Mrvi1	MRV integration site 1	chr7:110659801-110659742	17540	10.338	9.037	1.301	2.464	1	0.20068	0.358	0.00024
20	A_52_P361534	Wnt3	wingless-related MMTV integration site 3	chr11:103633814-103633873	22415	9.593	8.347	1.247	2.373	0.80143	0.14436	2.257	2e-05
21	A_52_P566741	Tcf7l2	transcription factor 7-like 2, T-cell specific, HMG-box	chr19:55986346-55986405	21416	13.062	11.846	1.216	2.324	1	0.14436	1.218	8e-05
22	A_52_P15377	Wnt9b	wingless-type MMTV integration site 9B	chr11:103543717-103543658	22412	8.596	7.384	1.213	2.318	1	0.14436	1.35	7e-05
23	A_52_P652950	Rora	RAR-related orphan receptor alpha	chr9:69184462-69184521	19883	7.732	6.538	1.193	2.287	1	0.14436	1.727	4e-05
24	A_52_P613596	Vav3	vav 3 oncogene	chr3:109813123-109813182	57257	10.729	9.561	1.167	2.246	1	0.14916	1.089	9e-05
25	A_51_P451498			chr3:109801572-109801631	NA	7.454	6.308	1.146	2.213	1	0.18501	0.798	0.00013
26	A_51_P477779	Rora	RAR-related orphan receptor alpha	chr9:69178068-69178127	19883	12.005	10.878	1.127	2.184	1	0.14436	1.875	3e-05
27	A_51_P163031	Ptpn3	protein tyrosine phosphatase, non-receptor type 3	chr4:57299036-57298977	545622	6.432	5.326	1.106	2.153	1	0.19415	0.503	0.0002
28	A_52_P305658	Ntng1	netrin G1	chr3:110062785-110062726	80883	7.908	6.803	1.106	2.152	1	0.2609	-0.359	0.0006
29	A_52_P558843	Efcbp1	EF hand calcium binding protein 1	chr4:14880407-14880348	69352	11.72	10.633	1.087	2.125	1	0.21871	0.255	0.00027
30	A_51_P137322	Cck	cholecystokinin	chr9:121338670-121338611	12424	14.001	12.915	1.086	2.122	1	0.22308	0.083	0.00034
31	A_52_P652442	Rora	RAR-related orphan receptor alpha	chr9:69177968-69178027	19883	12.431	11.36	1.072	2.102	1	0.14436	2.03	3e-05
32	A_51_P509997	Cox6a2	cytochrome c oxidase, subunit VI a, polypeptide 2	chr7:127996853-127996794	12862	11.886	10.833	1.053	2.075	1	0.22308	0.078	0.00034
33	A_51_P513000	Ntng1	netrin G1	chr3:109909407-109909348	80883	14.018	12.974	1.043	2.061	1	0.14436	1.511	5e-05
34	A_52_P146043	Tcf7l2	transcription factor 7-like 2, T-cell specific, HMG-box	chr19:55961735-55961794	21416	8.43	7.397	1.033	2.046	1	0.2609	-0.37	0.00061
35	A_52_P368690			chr9:44859191-44859250	NA	6.629	5.614	1.014	2.02	1	0.19861	0.384	0.00023
36	A_52_P258116	Wnt3	wingless-related MMTV integration site 3	chr11:103632185-103632244	22415	10.31	9.308	1.002	2.003	1	0.1907	0.687	0.00016
37	A_51_P349673	Rab37	RAB37, member of RAS oncogene family	chr11:114976595-114976774	58222	7.657	6.709	0.948	1.929	1	0.19415	0.547	0.00019
38	A_52_P128691	Gpr4	G protein-coupled receptor 4	chr7:18381145-18381204	319197	8.551	7.615	0.936	1.913	1	0.2609	-0.367	0.00061
39	A_51_P213099	Ntng1	netrin G1	chr3:110271545-110271486	80883	14.177	13.246	0.931	1.906	1	0.1907	0.594	0.00018
40	A_51_P192397	Scube2	signal peptide, CUB domain, EGF-like 2	chr7:109591756-109590529	56788	8.627	7.714	0.913	1.883	1	0.14436	1.417	6e-05
41	A_52_P370031			chr7:109588800-109588741	NA	7.195	6.291	0.904	1.871	1	0.22308	0.133	0.00032
42	A_51_P494751	Mael	maelstrom homolog (Drosophila)	chr1:168038186-168038127	98558	6.383	5.513	0.871	1.828	1	0.24715	-0.121	0.00044
43	A_51_P393124	Gabra4	gamma-aminobutyric acid (GABA-A) receptor, subunit alpha 4	chr5:71850578-71850519	14397	11.9	11.043	0.857	1.811	1	0.22308	0.085	0.00034
44	A_52_P333529	Slco2a1	solute carrier organic anion transporter family, member 2a1	chr9:102945854-102945913	24059	8.151	7.31	0.841	1.791	1	0.22308	0.081	0.00034
45	A_51_P235088	Dusp27	dual specificity phosphatase 27 (putative)	chr1:167935575-167935516	240892	6.779	5.95	0.828	1.776	1	0.19861	0.387	0.00023
46	A_51_P133936	Kitl	kit ligand	chr10:99529535-99529594	17311	10.327	9.5	0.827	1.774	1	0.2823	-0.54	0.00076
47	A_52_P94401	Rtn4rl1	reticulon 4 receptor-like 1	chr11:75082907-75082966	237847	10.556	9.73	0.826	1.773	1	0.22444	0.028	0.00037
48	A_52_P351116			chr10:87363621-87363680	NA	7.846	7.049	0.797	1.737	1	0.14436	1.235	8e-05
49	A_51_P154913			chr7:72098987-72098928	NA	6.538	5.742	0.796	1.736	1	0.2609	-0.278	0.00054
50	A_51_P173162	Edaradd	EDAR (ectodysplasin-A receptor)-associated death domain	chr13:12532215-12532156	171211	5.635	4.844	0.791	1.73	1	0.23047	-0.009	0.00038
51	A_52_P261322	Tanc1	tetratricopeptide repeat, ankyrin repeat and coiled-coil containing 1	chr2:59644408-59644467	66860	8.355	7.569	0.786	1.724	1	0.31199	-0.713	0.00094
52	A_52_P402960			chr1:121480488-121480429	NA	12.122	11.339	0.782	1.72	1	0.14436	1.544	5e-05
53	A_51_P438905	Inadl	InaD-like (Drosophila)	chr4:98211132-98211191	12695	11.831	11.054	0.777	1.713	1	0.25962	-0.214	0.0005
54	A_52_P549166	Arsj	arylsulfatase J	chr3:126431668-126431727	271970	8.141	7.366	0.775	1.712	1	0.14436	1.932	3e-05
55	A_51_P170987	Rgs7bp	regulator of G-protein signalling 7 binding protein	chr13:106069864-106069805	52882	10.503	9.749	0.754	1.687	1	0.2609	-0.361	0.0006
56	A_51_P476618	Slc12a8	solute carrier family 12 (potassium/chloride transporters), member 8	chr16:33582959-33583018	171286	8.997	8.245	0.752	1.684	1	0.23179	-0.042	0.0004
57	A_51_P409408	Nkx3-1	NK-3 transcription factor, locus 1 (Drosophila)	chr14:68147577-68147636	18095	5.711	4.983	0.728	1.656	1	0.26636	-0.416	0.00064
58	A_52_P184322	Trpm6	transient receptor potential cation channel, subfamily M, member 6	chr19:18944659-18944718	225997	6.222	5.495	0.727	1.656	1	0.1907	0.594	0.00018
59	A_51_P511000	C130090K23Rik	RIKEN cDNA C130090K23 gene	chr5:73732324-73732383	231293	7.771	7.051	0.72	1.647	1	0.14436	1.34	7e-05
60	A_51_P325941	Kcnj12	potassium inwardly-rectifying channel, subfamily J, member 12	chr11:60886778-60886836	16515	10.9	10.182	0.718	1.645	1	0.30975	-0.684	0.00091
61	A_52_P360308	Osbpl3	oxysterol binding protein-like 3	chr6:50223596-50223537	71720	8.527	7.813	0.714	1.64	1	0.30975	-0.687	0.00091
62	A_51_P462533			chr19:10518180-10518239	NA	14.061	13.349	0.712	1.639	1	0.14436	1.649	4e-05
63	A_51_P223583	Rgs3	regulator of G-protein signaling 3	chr4:62187519-62188437	50780	9.913	9.202	0.711	1.637	1	0.2609	-0.357	0.0006
64	A_52_P52703	Sh3d19	SH3 domain protein D19	chr3:86179693-86184101	27059	6.531	5.833	0.698	1.622	1	0.22308	0.07	0.00035
65	A_52_P261868	Rgs3	regulator of G-protein signaling 3	chr4:62186737-62187414	50780	10.933	10.243	0.69	1.613	1	0.24735	-0.146	0.00046
66	A_52_P295893	C130083B21Rik	RIKEN cDNA C130083B21 gene	chr3:109582569-109582628	320783	5.504	4.815	0.689	1.612	1	0.14436	1.954	3e-05
67	A_52_P325372	Ntng1	netrin G1	chr3:109959899-109959840	80883	5.988	5.3	0.688	1.611	1	0.14436	1.369	6e-05
68	A_51_P233304	6330406I15Rik	RIKEN cDNA 6330406I15 gene	chr5:149698501-149698560	70717	9.227	8.544	0.683	1.605	1	0.20091	0.342	0.00024
69	A_51_P243667	Aox4	aldehyde oxidase 4	chr1:58212566-58212625	71872	5.554	4.876	0.678	1.6	1	0.19861	0.382	0.00023
70	A_51_P422685	Zmat4	zinc finger, matrin type 4	chr8:25528122-25528181	320158	13.319	12.645	0.674	1.596	1	0.23179	-0.034	0.0004
71	A_52_P3276	6330406I15Rik	RIKEN cDNA 6330406I15 gene	chr5:149699249-149699308	70717	9.944	9.277	0.667	1.587	1	0.19415	0.504	0.0002
72	A_51_P253320	Rgs3	regulator of G-protein signaling 3	chr4:62188468-62188527	50780	11.406	10.743	0.662	1.583	1	0.31094	-0.697	0.00092
73	A_52_P203560	Fzd10	frizzled homolog 10 (Drosophila)	chr5:128918631-128918690	93897	9.541	8.896	0.645	1.563	1	0.22308	0.066	0.00035
74	A_51_P286106	5033430I15Rik	RIKEN cDNA 5033430I15 gene	chr13:45977368-45977427	76000	11.346	10.709	0.637	1.556	1	0.21871	0.216	0.00029
75	A_51_P464558	Chst9	carbohydrate (N-acetylgalactosamine 4-0) sulfotransferase 9	chr18:15595277-15595218	71367	6.297	5.687	0.611	1.527	1	0.2823	-0.553	0.00077
76	A_52_P592828	Adarb1	adenosine deaminase, RNA-specific, B1	chr10:76734611-76734552	110532	14.085	13.475	0.61	1.526	1	0.1907	0.609	0.00017
77	A_52_P155708	Creg1	cellular repressor of E1A-stimulated genes 1	chr1:167611137-167611196	433375	9.137	8.543	0.594	1.509	1	0.1907	0.6	0.00017
78	A_51_P212592	E430002G05Rik	RIKEN cDNA E430002G05 gene	chr2:102443710-102443769	210622	10.766	10.177	0.589	1.505	1	0.18501	0.774	0.00014
79	A_52_P215176	Opn3	opsin (encephalopsin)	chr1:177499426-177499367	13603	9.452	8.866	0.585	1.5	1	0.31199	-0.718	0.00095
80	A_52_P545132	Kcnc2	potassium voltage gated channel, Shaw-related subfamily, member 2	chr10:111869752-111869811	268345	12.53	11.948	0.582	1.497	1	0.2609	-0.24	0.00051
81	A_51_P342773			chr12:116587998-116588057	NA	10.343	9.767	0.575	1.49	1	0.2609	-0.272	0.00054
82	A_51_P131235	Ptpn20	protein tyrosine phosphatase, non-receptor type 20	chr14:32469401-32469460	19256	7.083	6.513	0.571	1.486	1	0.26937	-0.443	0.00067
83	A_51_P135732	4921511K06Rik	RIKEN cDNA 4921511K06 gene	chr6:29368146-29376676	232664	13.891	13.322	0.569	1.484	1	0.14916	1.073	9e-05
84	A_52_P649276	1110032A04Rik	RIKEN cDNA 1110032A04 gene	chr3:69908790-69908731	66183	8.538	7.974	0.565	1.479	1	0.2609	-0.307	0.00056
85	A_51_P507333	Kcnc2	potassium voltage gated channel, Shaw-related subfamily, member 2	chr10:111869832-111869891	268345	12.512	11.952	0.561	1.475	1	0.24715	-0.132	0.00045
86	A_51_P289836	Slc29a1	solute carrier family 29 (nucleoside transporters), member 1	chr17:45049059-45049000	63959	12.924	12.367	0.556	1.47	1	0.2609	-0.299	0.00056
87	A_52_P449417	Vangl1	vang-like 1 (van gogh, Drosophila)	chr3:102285917-102285858	229658	11.837	11.287	0.55	1.464	1	0.22444	0.033	0.00036
88	A_51_P311038	Adamts15	a disintegrin-like and metallopeptidase (reprolysin type) with thrombospondin type 1 motif, 15	chr9:30649072-30649013	235130	10.71	10.161	0.548	1.462	1	0.22308	0.146	0.00031
89	A_52_P946362	2900064K03Rik	RIKEN cDNA 2900064K03 gene	chr5:49806138-49806079	72976	5.614	5.071	0.544	1.458	1	0.30242	-0.655	0.00087
90	A_52_P348031	Syt9	synaptotagmin IX	chr7:107339241-107339300	60510	10.865	10.366	0.499	1.414	1	0.1907	0.614	0.00017
91	A_51_P347312	Ogfrl1	opioid growth factor receptor-like 1	chr1:23324524-23324465	70155	13.838	13.344	0.494	1.408	1	0.14436	1.278	7e-05
92	A_51_P206644			chr9:67555923-67555864	NA	7.432	6.939	0.493	1.407	1	0.2823	-0.533	0.00075
93	A_51_P134228	Hlf	hepatic leukemia factor	chr11:90154813-90154754	217082	12.878	12.387	0.491	1.405	1	0.21871	0.226	0.00028
94	A_51_P200667	Clmn	calmin	chr12:105164520-105164461	94040	13.041	12.564	0.477	1.391	1	0.22308	0.15	0.00031
95	A_51_P466781	Ropn1	ropporin, rhophilin associated protein 1	chr16:34596967-34597026	76378	5.897	5.424	0.474	1.389	1	0.27979	-0.518	0.00073
96	A_52_P370133	Vav3	vav 3 oncogene	chr3:109786046-109792399	57257	5.368	4.898	0.47	1.385	1	0.21871	0.243	0.00028
97	A_51_P373082	Bok	Bcl-2-related ovarian killer protein	chr1:95526078-95526137	51800	13.952	13.497	0.454	1.37	1	0.30103	-0.623	0.00084
98	A_52_P755306			chr13:78742272-78742331	NA	5.712	5.266	0.447	1.363	1	0.26636	-0.403	0.00063
99	A_52_P1061635			chr11:6551128-6550882	NA	5.14	4.698	0.442	1.358	1	0.18024	0.845	0.00013
100	A_52_P1068320	Tnfrsf11a	tumor necrosis factor receptor superfamily, member 11a	chr1:107674722-107674781	21934	7.894	7.452	0.441	1.358	1	0.2609	-0.312	0.00056
101	A_51_P120388	4631426E05Rik	RIKEN cDNA 4631426E05 gene	chr15:36448947-36448888	66696	5.02	4.583	0.438	1.354	1	0.2609	-0.284	0.00054
102	A_51_P299243	Msra	methionine sulfoxide reductase A	chr14:63077088-63077029	110265	11.35	10.915	0.435	1.352	1	0.27667	-0.502	0.00072
103	A_51_P318123				NA	5.241	4.814	0.427	1.345	1	0.31199	-0.719	0.00095
104	A_51_P138744	Ptpn4	protein tyrosine phosphatase, non-receptor type 4	chr1:121506306-121503190	19258	7.3	6.876	0.424	1.342	1	0.31199	-0.725	0.00095
105	A_52_P292853	AB112350	cDNA sequence AB112350	chr5:21177166-21177107	242864	7.761	7.351	0.41	1.329	1	0.2609	-0.313	0.00057
106	A_51_P452533	D1Ertd471e	DNA segment, Chr 1, ERATO Doi 471, expressed	chr1:168153186-168153245	27877	13.904	13.513	0.391	1.311	1	0.30103	-0.644	0.00086
107	A_52_P414645	Gpr126	G protein-coupled receptor 126	chr10:14094980-14094921	215798	6.306	5.935	0.372	1.294	1	0.26636	-0.419	0.00065
108	A_52_P61505			chr3:126372414-126372473	NA	5.497	5.147	0.35	1.275	1	0.27204	-0.481	0.0007
109	A_52_P210101	E430024P14Rik	RIKEN cDNA E430024P14 gene	chr17:7768842-7768783	320936	8.433	8.806	-0.373	0.772	1	0.28624	-0.571	0.00079
110	A_52_P920158	Rbm24	RNA binding motif protein 24	chr13:46441878-46441937	666794	10.478	10.852	-0.374	0.772	1	0.2823	-0.549	0.00076
111	A_51_P466857	Vstm2	V-set and transmembrane domain containing 2	chr11:16184054-16184113	211739	13.776	14.171	-0.395	0.76	1	0.27009	-0.46	0.00068
112	A_52_P1101125			chr17:68751320-68751379	NA	6.812	7.231	-0.42	0.748	1	0.27009	-0.459	0.00068
113	A_51_P171832	Nrgn	neurogranin	chr9:37294246-37294187	64011	14.095	14.523	-0.428	0.743	1	0.24715	-0.135	0.00045
114	A_51_P399653	Crhr2	corticotropin releasing hormone receptor 2	chr6:55019736-55019677	12922	11.343	11.8	-0.457	0.729	1	0.23047	-0.015	0.00039
115	A_51_P417077	Vill	villin-like	chr9:118919920-118919979	22351	9.15	9.617	-0.467	0.723	1	0.30103	-0.628	0.00084
116	A_51_P448127	2410004A20Rik	RIKEN cDNA 2410004A20 gene	chr9:72901482-72901541	66991	7.344	7.83	-0.486	0.714	1	0.27069	-0.47	0.00069
117	A_52_P405655	Sall3	sal-like 3 (Drosophila)	chr18:81130723-81130664	20689	9.549	10.053	-0.504	0.705	1	0.22308	0.057	0.00035
118	A_51_P374878	D330045A20Rik	RIKEN cDNA D330045A20 gene	chrX:134900751-134900810	102871	7.727	8.244	-0.517	0.699	1	0.2609	-0.27	0.00054
119	A_51_P145380	Zar1	zygote arrest 1	chr5:72857570-72857432	317755	8.841	9.364	-0.523	0.696	1	0.25266	-0.183	0.00048
120	A_52_P113611	Scn5a	sodium channel, voltage-gated, type V, alpha	chr9:119332217-119332158	20271	13.335	13.89	-0.555	0.681	1	0.14436	1.812	4e-05
121	A_51_P480202	Dlx2	distal-less homeobox 2	chr2:71344394-71344335	13392	10.416	10.975	-0.559	0.679	1	0.19861	0.445	0.00021
122	A_52_P589568	Foxo6	forkhead box O6	chr4:119764777-119764718	329934	12.046	12.611	-0.565	0.676	1	0.30103	-0.643	0.00086
123	A_52_P843274			chr7:115795113-115795054	NA	6.982	7.558	-0.575	0.671	1	0.31416	-0.736	0.00097
124	A_51_P246345	Myl7	myosin, light polypeptide 7, regulatory	chr11:5796699-5796640	17898	8.603	9.265	-0.662	0.632	1	0.2609	-0.234	0.00051
125	A_51_P518600	Atp6v1c2	ATPase, H+ transporting, lysosomal V1 subunit C2	chr12:17310299-17310240	68775	8.846	9.544	-0.699	0.616	1	0.2609	-0.361	0.0006
126	A_52_P158476	Prok2	prokineticin 2	chr6:99677023-99676964	50501	7.741	8.5	-0.758	0.591	1	0.19415	0.512	0.0002
127	A_51_P429252	Prok2	prokineticin 2	chr6:99676927-99676868	50501	7.811	8.693	-0.881	0.543	1	0.25266	-0.175	0.00047

## Sheet: I. C57BL6 cerebellum DEGs
BioConductor Gene Listing
YoungVsOld: B > 0
									YoungVsOld
No	ProbeID	ShortName	LongName	GenomicCoord.ENS	GeneID	RefSeq	Young.aveA	Old.aveA	M	Fold	AdjP	FDR	B
1	A_51_P170463	Gpr17	G protein-coupled receptor 17	chr18:32102669-32109290	574402	NM_001025381	11.813	10.984	0.828	1.776	1	0.06386	1.541
2	A_52_P51078	Ctsh	cathepsin H	chr9:89949375-89970925	13036	NM_007801	12.51	12.914	-0.404	0.756	1	0.16549	0.165
3	A_51_P262079	H2-Q7 (H2-Q7, H2-Q9)	histocompatibility 2, Q region locus 7	chr17:35576100-35580588	15018	NM_010394	12.458	12.899	-0.441	0.737	1	0.11107	0.747
4	A_52_P326657	BC030183 (Fam167b)	cDNA sequence BC030183	chr4:129254113-129255791	230766	NM_182783	7.466	7.908	-0.443	0.736	1	0.13933	0.434
5	A_52_P313279	H2-D1 (H2-D1, H2-L, H2-Q2)	histocompatibility 2, D region locus 1	chr17:35400039-35404440	14964	NM_010380	13.379	13.823	-0.444	0.735	1	0.11815	0.654
6	A_51_P193146	Ms4a6c	membrane-spanning 4-domains, subfamily A, member 6C	chr19:11543962-11555203	73656	NM_028595	6.066	6.539	-0.473	0.72	1	0.0867	1.149
7	A_51_P444565	EG630499*	predicted gene, EG630499	chr17:36245531-36248633	630499 (100046736, 667803)	NM_001081015	12.685	13.159	-0.474	0.72	1	0.13953	0.421
8	A_51_P496996	H2-D1 (H2-D1, H2-L, H2-Q2)	histocompatibility 2, D region locus 1	chr17:35400039-35404440	14964	NM_010380	12.725	13.21	-0.485	0.715	1	0.15355	0.315
9	A_51_P250590	Sbf2*	SET binding factor 2		319934*		9.831	10.317	-0.486	0.714	1	0.17005	0.126
10	A_51_P484027	Cd300d (AF251705)	Cd300D antigen	chr11:114858083-114863194	140497	NM_134158	7.8	8.315	-0.515	0.7	1	0.15926	0.242
11	A_52_P47846	Fcgr1	Fc receptor, IgG, high affinity I	chr3:96086832-96098179	14129		7.373	7.898	-0.525	0.695	1	0.05976	1.715
12	A_51_P129006	B2m	beta-2 microglobulin	chr2:121973422-121978610	12010	NM_009735	12.217	12.758	-0.541	0.687	1	0.06545	1.49
13	A_51_P273921	Capg	capping protein (actin filament), gelsolin-like	chr6:72494385-72512977	12332	NM_007599	9.678	10.222	-0.544	0.686	1	0.16186	0.202
14	A_51_P357606	Phyhd1	phytanoyl-CoA dioxygenase domain containing 1	chr2:30121723-30137668	227696	NM_172267	13.768	14.313	-0.545	0.685	1	0.11685	0.674
15	A_52_P50496	H2-K1	histocompatibility 2, K1, K region	chr17:34132973-34137229	14972	NM_001001892	10.519	11.069	-0.55	0.683	1	0.13367	0.486
16	A_51_P166648	4931408A02Rik	RIKEN cDNA 4931408A02 gene	chr16:90826964-90905130	70967 (630876, 70967)	NM_027627	10.773	11.331	-0.558	0.679	1	0.16186	0.2
17	A_51_P494597	BC013712	cDNA sequence BC013712	chr4:132337765-132352297	230787		7.951	8.513	-0.562	0.677	1	0.09801	0.887
18	A_52_P582814	H2-Q1 (H2-Q1, H2-Q6, Ms10t)	histocompatibility 2, Q region locus 1	chr17:35561795-35566998| 17:35516576-35521559	15006 (68395, 110557)	XM_903697	12.564	13.13	-0.566	0.676	1	0.0617	1.584
19	A_52_P354823	Irf8	interferon regulatory factor 8	chr8:123260258-123280590	15900	NM_008320	9.765	10.342	-0.577	0.67	1	0.12403	0.569
20	A_52_P180373	Mpeg1	macrophage expressed gene 1	chr19:12535546-12538291	17476	NM_010821	6.604	7.192	-0.588	0.665	1	0.08943	1.085
21	A_52_P338956	A530050D06Rik	RIKEN cDNA A530050D06 gene	chr12:113344894-113365784	104816	NM_001081169	10.327	10.917	-0.59	0.664	1	0.17679	0.067
22	A_51_P177744	Zc3hav1	zinc finger CCCH type, antiviral 1	chr6:38255286-38304603	78781	NM_028864	8.708	9.307	-0.599	0.66	1	0.12403	0.572
23	A_51_P130095	Fcgr2b	Fc receptor, IgG, low affinity IIb	chr1:172890698-172906202	14130	NM_010187	7.519	8.12	-0.6	0.66	1	0.09691	0.958
24	A_51_P369803	Psmb9	proteosome (prosome, macropain) subunit, beta type 9 (large multifunctional peptidase 2)	chr17:34318933-34324318	16912	NM_013585	9.898	10.509	-0.611	0.655	1	0.04172	2.13
25	A_52_P722931	AK042659					10.217	10.83	-0.613	0.654	1	0.16549	0.161
26	A_51_P351860	C1qb	complement component 1, q subcomponent, beta polypeptide	chr4:136436048-136442028	12260	NM_009777	12.047	12.662	-0.615	0.653	1	0.11107	0.753
27	A_51_P172853	Cd14	CD14 antigen	chr18:36884728-36886390	12475	NM_009841	9.161	9.777	-0.616	0.653	1	0.06483	1.513
28	A_51_P251768	Emr1	EGF-like module containing, mucin-like, hormone receptor-like sequence 1	chr17:57498114-57628671	13733	NM_010130	8.969	9.585	-0.616	0.652	1	0.18066	0.034
29	A_51_P104897	Itpr3	inositol 1,4,5-triphosphate receptor 3	chr17:27194481-27259167	16440	NM_080553	11.864	12.483	-0.619	0.651	1	0.17005	0.119
30	A_51_P190499	H2-K1*	histocompatibility 2, K1, K region		14972*		11.576	12.199	-0.624	0.649	1	0.1509	0.338
31	A_52_P674331	3222401L13Rik	RIKEN cDNA 3222401L13 gene	chr18:37815561-37818391	320513*		8.254	8.888	-0.635	0.644	1	0.16186	0.196
32	A_51_P449325	H2-Oa	histocompatibility 2, O region alpha locus	chr17:34229333-34232176	15001	NM_008206	7.639	8.277	-0.638	0.643	1	0.17968	0.046
33	A_51_P108459	Gpr65	G-protein coupled receptor 65	chr12:99506845-99514834	14744	NM_008152	6.329	6.969	-0.64	0.642	0.81341	0.03538	2.65
34	A_52_P70255	Stat1	signal transducer and activator of transcription 1	chr1:52176282-52218704	20846	NM_009283	10.407	11.05	-0.643	0.64	1	0.0946	1.002
35	A_51_P371710	Tlr7	toll-like receptor 7	chrX:163742861-163768460	170743	NM_133211	7.196	7.84	-0.644	0.64	1	0.17005	0.115
36	A_51_P174176	Serpinf2	serine (or cysteine) peptidase inhibitor, clade F, member 2	chr11:75245234-75253005	18816	NM_008878	6.056	6.704	-0.648	0.638	0.80229	0.03538	2.661
37	A_51_P236118	Ptpn18	protein tyrosine phosphatase, non-receptor type 18	chr1:34516591-34530620	19253		10.788	11.436	-0.648	0.638	1	0.04172	2.16
38	A_52_P306831	Pram1	PML-RAR alpha-regulated adaptor molecule 1	chr17:33775047-33782645	378460	NM_001002842	7.501	8.153	-0.651	0.637	1	0.09691	0.943
39	A_52_P670026	Rsad2	radical S-adenosyl methionine domain containing 2	chr12:27127608-27141298	58185	NM_021384	8.151	8.804	-0.653	0.636	1	0.06754	1.424
40	A_52_P170188	Hcst	hematopoietic cell signal transducer	chr7:31202736-31204873	23900	NM_011827	7.39	8.054	-0.663	0.631	1	0.04514	2.048
41	A_51_P438820	Pycard	PYD and CARD domain containing	chr7:135136148-135137250	66824	NM_023258	9.37	10.041	-0.67	0.628	1	0.0946	0.99
42	A_52_P114722	Ptpn6	protein tyrosine phosphatase, non-receptor type 6	chr6:124670735-124683584	15170	NM_013545	8.696	9.373	-0.678	0.625	1	0.09801	0.901
43	A_51_P235835	(D12Ertd647e)	ISG12a proteinPutative uncharacterized protein ; [Source:UniProtKB/TrEMBL;Acc:Q9D1E1]	chr12:104672461-104678449			11.024	11.703	-0.679	0.625	1	0.08992	1.068
44	A_52_P460230	Cd48	CD48 antigen	chr1:173612141-173635380	12506	NM_007649	6.089	6.77	-0.681	0.624	1	0.09801	0.882
45	A_51_P296755	Fcgr1	Fc receptor, IgG, high affinity I	chr3:96086832-96098179	14129	NM_010186	9.705	10.395	-0.69	0.62	1	0.04172	2.182
46	A_52_P14600	Cd72	CD72 antigen	chr4:43460596-43467456	12517	XM_973150	6.822	7.517	-0.695	0.618	1	0.04172	2.206
47	A_51_P102789	C1qc	complement component 1, q subcomponent, C chain	chr4:136445724-136448808	12262	NM_007574	12.381	13.084	-0.703	0.614	1	0.13933	0.432
48	A_52_P207194	Dgkg*	diacylglycerol kinase, gamma		110197*		8.452	9.16	-0.709	0.612	1	0.15931	0.233
49	A_51_P241457	Lilrb4 (Gp49a, Lilrb4)	leukocyte immunoglobulin-like receptor, subfamily B, member 4	chr10:51200446-51216419	14728	NM_013532	5.885	6.597	-0.713	0.61	1	0.08792	1.125
50	A_52_P87713	Timp1	tissue inhibitor of metalloproteinase 1	chrX:20447347-20451861	21857	NM_011593	9.226	9.94	-0.713	0.61	1	0.07295	1.331
51	A_51_P405476	Fcer1g	Fc receptor, IgE, high affinity I, gamma polypeptide	chr1:173159709-173164436	14127	NM_010185	11.754	12.468	-0.715	0.609	1	0.1703	0.106
52	A_51_P262171	Irgm (Irgm1)	immunity-related GTPase family, M	chr11:48678752-48684922	15944	NM_008326	10.379	11.112	-0.733	0.602	1	0.05976	1.676
53	A_51_P105078	S100a4	S100 calcium binding protein A4	chr3:90407692-90409967	20198	NM_011311	10.144	10.879	-0.735	0.601	1	0.08994	1.056
54	A_51_P345366	Psmb8	proteosome (prosome, macropain) subunit, beta type 8 (large multifunctional peptidase 7)	chr17:34335313-34338399	16913	NM_010724	10.677	11.427	-0.75	0.595	1	0.11616	0.689
55	A_51_P377833	Cmtm7	CKLF-like MARVEL transmembrane domain containing 7	chr9:114665958-114690964	102545*	NM_133978	10.619	11.37	-0.75	0.594	1	0.06131	1.605
56	A_51_P262515	Phf11	PHD finger protein 11	chr14:59895751-59916353	219131 (219131, 236451, 628693)	NM_172603	7.273	8.025	-0.752	0.594	1	0.12403	0.598
57	A_51_P383032	Clec4d	C-type lectin domain family 4, member d	chr6:123212135-123225283	17474	NM_010819	5.425	6.177	-0.752	0.594	0.27172	0.02471	3.478
58	A_52_P467389	Slc15a3	solute carrier family 15, member 3	chr19:10917034-10932393	65221	NM_023044	7.15	7.904	-0.754	0.593	1	0.15738	0.268
59	A_51_P377620	Ifi205 (Ifi205| Mnda)	interferon activated gene 205	chr1:175942129-175961886| 1:175826481-175843177	226695 (226695| 381308)	NM_172648	8.609	9.37	-0.76	0.59	1	0.06754	1.431
60	A_51_P286737	Ccl2	chemokine (C-C motif) ligand 2	chr11:81849079-81850954	20296	NM_011333	6.953	7.713	-0.761	0.59	1	0.04172	2.154
61	A_51_P345367	Psmb8	proteosome (prosome, macropain) subunit, beta type 8 (large multifunctional peptidase 7)	chr17:34335313-34338399	16913	NM_010724	10.734	11.496	-0.762	0.59	1	0.09701	0.923
62	A_51_P331831	Hvcn1	hydrogen voltage-gated channel 1	chr5:122659902-122692306	74096	NM_028752	8.177	8.942	-0.765	0.588	1	0.15738	0.274
63	A_51_P423578	Slfn2	schlafen 2	chr11:82878614-82884176	20556	NM_011408	7.826	8.593	-0.767	0.588	1	0.06131	1.612
64	A_51_P369550	Cd84*	CD84 antigen		12523*	NM_013489	7.361	8.15	-0.789	0.579	0.04471	0.00787	4.758
65	A_51_P445726	Lilrb3	leukocyte immunoglobulin-like receptor, subfamily B (with TM and ITIM domains), member 3	chr7:3663046-3671954	18733 (18733, 100044531)	NM_011095	7.798	8.604	-0.806	0.572	1	0.05183	1.867
66	A_51_P120470	Cd68	CD68 antigen	chr11:69477715-69479655	12514	NM_009853	9.278	10.093	-0.815	0.568	0.71183	0.03538	2.753
67	A_51_P154842	Oas1f	2'-5' oligoadenylate synthetase 1F	chr5:121297376-121307991	243262	NM_145153	8.352	9.179	-0.827	0.564	1	0.08422	1.186
68	A_51_P452629	Tlr2	toll-like receptor 2	chr3:83640195-83645485	24088	NM_011905	8.277	9.111	-0.834	0.561	1	0.06754	1.407
69	A_52_P700056	OTTMUSG00000000971	predicted gene, OTTMUSG00000000971	chr11:83517558-83519771	100034251	NM_001081957	7.719	8.557	-0.838	0.559	0.20797	0.02471	3.675
70	A_51_P460954	Ccl6	chemokine (C-C motif) ligand 6	chr11:83401388-83406589	20305	NM_009139	8.864	9.726	-0.863	0.55	0.07491	0.0107	4.403
71	A_51_P304170	Rtp4	receptor transporter protein 4	chr16:23610028-23613819	67775	NM_023386	10.362	11.23	-0.868	0.548	1	0.05183	1.887
72	A_51_P142861	Casp1	caspase 1	chr9:5298517-5307265	12362 (12362, 100044207)	NM_009807	9.415	10.286	-0.871	0.547	0.44048	0.02938	3.118
73	A_51_P261517	Tyrobp	TYRO protein tyrosine kinase binding protein	chr7:31198809-31202596	22177	NM_011662	12.669	13.55	-0.881	0.543	1	0.05183	1.86
74	A_52_P24447	Nkg7	natural killer cell group 7 sequence	chr7:50692443-50693616	72310	NM_024253	6.941	7.824	-0.883	0.542	0.56959	0.03508	2.923
75	A_52_P86693	D12Ertd647e	DNA segment, Chr 12, ERATO Doi 647, expressed	chr12:104672461-104678449	52668	NM_026790	14.001	14.891	-0.89	0.54	1	0.1509	0.344
76	A_51_P269549	Trem2	triggering receptor expressed on myeloid cells 2	chr17:48485837-48491596	83433	NM_031254	10.262	11.154	-0.892	0.539	1	0.11261	0.725
77	A_51_P484020	Cd300d (AF251705)	Cd300D antigen	chr11:114858083-114863194	140497	NM_134158	9.96	10.854	-0.894	0.538	0.99964	0.03705	2.491
78	A_52_P337357	Oas1a	2'-5' oligoadenylate synthetase 1A	chr5:121346729-121357494	246730	NM_145211	7.906	8.806	-0.9	0.536	0.70927	0.03538	2.756
79	A_51_P390538	Mpeg1*	macrophage expressed gene 1		17476*	NM_010821	11.437	12.341	-0.903	0.535	1	0.12403	0.571
80	A_51_P445728	Lilrb3	leukocyte immunoglobulin-like receptor, subfamily B (with TM and ITIM domains), member 3	chr7:3663046-3671954	18733 (18733, 100044531)	NM_011095	8.074	8.986	-0.912	0.532	1	0.04015	2.388
81	A_51_P327751	Ifit1	interferon-induced protein with tetratricopeptide repeats 1	chr19:34715375-34724454	15957	NM_008331	8.178	9.095	-0.916	0.53	1	0.08881	1.104
82	A_52_P152133	H2-Q8*	histocompatibility 2, Q region locus 8		15019*	NM_023124	8.257	9.2	-0.943	0.52	1	0.05976	1.675
83	A_51_P362029	Cd48	CD48 antigen	chr1:173612141-173635380	12506	NM_007649	7.776	8.737	-0.961	0.514	1	0.05183	1.884
84	A_51_P387123	Oasl2	2'-5' oligoadenylate synthetase-like 2	chr5:115347516-115362233	23962	NM_011854	9.661	10.649	-0.988	0.504	1	0.12403	0.566
85	A_51_P494241	Bcl2a1b (Bcl2a1b, Bcl2a1d)	B-cell leukemia/lymphoma 2 related protein A1b	chr9:89094047-89102664	12045	NM_007534	8.607	9.599	-0.992	0.503	0.04721	0.00787	4.721
86	A_51_P359636	Lgals3bp	lectin, galactoside-binding, soluble, 3 binding protein	chr11:118254066-118263262	19039	NM_011150	12.363	13.358	-0.995	0.502	1	0.05976	1.696
87	A_51_P269546	Trem2	triggering receptor expressed on myeloid cells 2	chr17:48485837-48491596	83433	NM_031254	12.273	13.274	-1.001	0.5	0.59621	0.03508	2.888
88	A_51_P520639	BC052484	cDNA sequence BC052484	chr17:25872985-25885275	328783	NM_177822	6.916	7.925	-1.009	0.497	1	0.15738	0.279
89	A_51_P246066	Slamf9	SLAM family member 9	chr1:174405505-174408706	98365	NM_029612	8.527	9.541	-1.014	0.495	0.3304	0.02601	3.333
90	A_51_P464703	Ccl8	chemokine (C-C motif) ligand 8	chr11:81928694-81930297	20307	NM_021443	6.116	7.153	-1.038	0.487	1	0.10328	0.828
91	A_51_P169693	Bst2	bone marrow stromal cell antigen 2	chr8:74058163-74061328	69550	NM_198095	10.957	12.011	-1.054	0.481	0.42489	0.02938	3.145
92	A_51_P321150	Lyzs (Lyz2)	lysozyme	chr10:116714390-116719343	17105	NM_017372	8.336	9.396	-1.06	0.48	1	0.04172	2.218
93	A_51_P438967	Gpnmb	glycoprotein (transmembrane) nmb	chr6:48986612-49006778	93695	NM_053110	7.825	8.905	-1.08	0.473	0.92787	0.03571	2.548
94	A_52_P249514	Ccl12	chemokine (C-C motif) ligand 12	chr11:81915347-81916901	20293 (100048556, 20293)	NM_011331	7.846	8.931	-1.085	0.471	1	0.07892	1.253
95	A_51_P164219	Usp18	ubiquitin specific peptidase 18	chr6:121195925-121220934	24110 (24110, 100048346)	NM_011909	8.532	9.623	-1.09	0.47	1	0.04172	2.144
96	A_52_P638459	Ccl5	chemokine (C-C motif) ligand 5	chr11:83339285-83344020	20304		8.792	9.904	-1.112	0.463	1	0.13367	0.484
97	A_51_P485312	Ccl5	chemokine (C-C motif) ligand 5	chr11:83339285-83344020	20304	NM_013653	7.404	8.553	-1.149	0.451	1	0.09691	0.936
98	A_52_P238027	Lyzs (Lyz2)	lysozyme	chr10:116714390-116719343	17105	NM_017372	12.796	13.965	-1.169	0.445	0.67621	0.03538	2.792
99	A_51_P112966	Ch25h*	cholesterol 25-hydroxylase		12642*	NM_009890	7.014	8.19	-1.176	0.443	0.22268	0.02471	3.625
100	A_51_P408343	Ifi204	interferon activated gene 204	chr1:175677427-175697050	15951	NM_008329	7.725	8.924	-1.199	0.436	1	0.04015	2.368
101	A_52_P582059	Lyz (Lyz1)	lysozyme	chr10:116724853-116729939	17110	NM_013590	10.519	11.73	-1.211	0.432	0.90365	0.03571	2.569
102	A_51_P101929	Lgals3	lectin, galactose binding, soluble 3	chr14:47993590-48005473	16854	NM_010705	9.084	10.344	-1.26	0.418	0.74691	0.03538	2.716
103	A_52_P654624	4933439C20Rik*	RIKEN cDNA 4933439C20 gene		66776*		13.705	14.994	-1.289	0.409	1	0.06131	1.605
104	A_51_P428708	C4b (C4a| C4b)	complement component 4B (Childo blood group)	chr17:34946039-34960399| 17:34865329-34880827	12268 (625018| 675521, 12268, 100045680)	NM_009780	10.733	12.032	-1.298	0.407	1	0.06754	1.407
105	A_52_P374960	Ostn	osteocrin	chr16:27307727-27351294	239790	NM_198112	7.36	8.682	-1.322	0.4	1	0.15926	0.243
106	A_51_P140710	Ccl3	chemokine (C-C motif) ligand 3	chr11:83461346-83462880	20302	NM_011337	6.28	7.681	-1.401	0.379	0.00747	0.00187	5.914
107	A_51_P151126	Cd52	CD52 antigen	chr4:133649455-133650988	23833	NM_013706	11.015	12.496	-1.481	0.358	0.26316	0.02471	3.502
108	A_51_P303424	Itgax	integrin alpha X	chr7:135273061-135294170	16411	NM_021334	6.572	8.233	-1.66	0.316	1	0.04051	2.313
109	A_52_P90364	Ifi27	interferon, alpha-inducible protein 27	chr12:104680379-104681870	76933	NM_029803	9.982	11.863	-1.881	0.272	0.00058	0.00029	7.354
110	A_51_P358233	Ifi27	interferon, alpha-inducible protein 27	chr12:104680379-104681870	76933		10.589	12.56	-1.971	0.255	0.00082	0.00029	7.17
111	A_52_P90363	Ifi27	interferon, alpha-inducible protein 27	chr12:104680379-104681870	76933	NM_029803	10.684	12.683	-1.999	0.25	0.00086	0.00029	7.149
112	A_51_P246653	Clec7a	C-type lectin domain family 7, member a	chr6:129411611-129422790	56644	NM_020008	8.025	10.038	-2.013	0.248	0.33802	0.02601	3.316
113	A_51_P326826	AK090125					9.795	11.931	-2.136	0.228	1	0.04015	2.346
114	A_51_P137419	Cst7	cystatin F (leukocystatin)	chr2:150396151-150404672	13011	NM_009977	6.643	8.942	-2.3	0.203	0.89237	0.03571	2.579
